# Supplementary material for: Potential emerging chemical risks in the food chain associated with substances registered under REACH
Source: Royal Society of Chemistry journal article supplement (doi:10.1039/c9em00369j), 2019-12-02
Supplement: c9em00369j1.xlsx [file c9em00369j1.xlsx]

## Sheet: INFO
Columns	Explanation
A-D	Substance identification information and outcome of the prioritisation
E-V	Scoring results, Pivot table and weighting scenario results and important additional information (e.g. whether toxicity classification is impacted by impurities)
W-Y	Additional toxicity information
W	Basis of the toxicity score classification based on the hierarchical evaluation
	HARMON - Harmonised classification
	IARC - IARC classification for carcinogenicity
	JOINT - Joint classification from REACH registration dossiers
	INDIV - Individual classification from REACH registration dossiers
	OTH-YES - Other classification assessed as more reliable (>2 notifications per endpoint)
	OTH-NO - Other classifications asssessed as less reliable (<= 2 notificaions per endpoint)
	not classified - no classification for any of the four endpoints in any source
Y	Endpoint for classifications
	CARC - Carcinogenicity
	MUTA - Mutagenicity
	REPR - Reprotoxicity
	STOT RE - Systemic target organ toxicity - repeated exposure
Z-AO	Details of scores in food/feed items (block C)
AP-AW	Physico-chemical properties details
AX-BA	Additional use information
BB-BF	Addition information on substance type and structure representativeness (if assessed)
Only in sheet '212_substances':
BG	Indication whether in-depth evaluation was performed

## Sheet: 2336_substances
CAS No.	Name	Final priority substance	In-depth evaluation performed	Score A	Default Tonnage Score	Default ERC Score	Score B	Score A > 5 OR Score B > 5	Score C	Final Tox Score	Reliability of Tox Score	Total Score and Ranking ->	Pivot Table selection	Total Score (WS1)	Total Score (WS2)	Priority WS1	Priority WS2	Priority WS1 AND WS2	Priority WS1 OR WS2	Ranking WS 1	Ranking WS 2	Toxicity classification ->	Basis	Endpoint for basis of scoring (including OTH-NO)	Scores in food/ feed items (block C) ->	Score C 10 in FISH	Score C 10 in F&V	Score C 10 in M&M	Fish 1	Fish 2	Beef Cattle	Dairy cattle	Milk	Dairy Products	Apple	Grain	Potato	Lettuce	Carrot	Grass	Physico-chemical properties ->	SMILES	Molecular formula	MW	log Kow	log Koa	log Kaw	Biotransformation half-life [d]	Additional use information ->
64741-45-3	residues (petroleum), atm. tower;residues, petroleum, atm. tower;residues, petroleum, atmospheric tower;residues(petroleum),atm.tower;64741453;residues (petroleum), atm. tower residues, petroleum, atm. tower residues, petroleum, atmospheric tower residues(petroleum),atm.tower 64741453	Excluded (petroleum product)	NO	10	NO	NO	10	TRUE	10	10	High		TRUE	300	100	YES	YES	TRUE	TRUE	1	1		HARMON	CARC		x		x	10	10	10	10	6	10	6	6	6	6	6	6		c1cccc2cc3ccc4cccc5ccc(c12)c3c45	C20H12	252.29	6.13	10.859	-4.729	0.904
64741-57-7	gas oils (petroleum), heavy vacuum;gas oils, petroleum, heavy vacuum;gasoils(petroleum),heavyvacuum;gas oils (petroleum), heavy vacuum gas oils, petroleum, heavy vacuum gasoils(petroleum),heavyvacuum	Excluded (petroleum product)	NO	10	NO	NO	10	TRUE	10	10	High		TRUE	300	100	YES	YES	TRUE	TRUE	1	1		HARMON	CARC		x		x	10	10	10	10	6	10	6	6	6	6	6	6		c1cccc2cc3ccc4cccc5ccc(c12)c3c45	C20H12	252.29	6.13	10.859	-4.729	0.904
64741-61-3	distillates (petroleum), heavy catalytic cracked;distillates, petroleum, heavy catalytic cracked;distillates(petroleum),heavycatalytic cracked;distillates (petroleum), heavy catalytic cracked distillates, petroleum, heavy catalytic cracked distillates(petroleum),heavycatalytic cracked	Excluded (petroleum product)	NO	10	NO	NO	10	TRUE	10	10	High		TRUE	300	100	YES	YES	TRUE	TRUE	1	1		HARMON	CARC		x		x	10	10	10	10	6	10	6	6	6	6	6	6		c1cccc2cc3ccc4cccc5ccc(c12)c3c45	C20H12	252.29	6.13	10.859	-4.729	0.904
64741-62-4	clarified oils (petroleum), catalytic cracked;clarified oils, petroleum, catalytic cracked;clarifiedoils(petroleum),catalyticcracked;clarified slurry oil;catalytic cracked clarified oil;clarified oils (petroleum), catalytic cracked clarified oils, petroleum, catalytic cracked clarifiedoils(petroleum),catalyticcracked clarified slurry oil catalytic cracked clarified oil	Excluded (petroleum product)	NO	10	NO	NO	10	TRUE	10	10	High		TRUE	300	100	YES	YES	TRUE	TRUE	1	1		HARMON	CARC		x		x	10	10	10	10	6	10	6	6	6	6	6	6		c1cccc2cc3ccc4cccc5ccc(c12)c3c45	C20H12	252.29	6.13	10.859	-4.729	0.904
64741-75-9	residues (petroleum), hydrocracked;residues, petroleum, hydrocracked;residues(petroleum),hydrocracked;residues (petroleum), hydrocracked residues, petroleum, hydrocracked residues(petroleum),hydrocracked	Excluded (petroleum product)	NO	10	NO	NO	10	TRUE	10	10	High		TRUE	300	100	YES	YES	TRUE	TRUE	1	1		HARMON	CARC		x		x	10	10	10	10	6	10	6	6	6	6	6	6		c1cccc2cc3ccc4cccc5ccc(c12)c3c45	C20H12	252.29	6.13	10.859	-4.729	0.904
64741-80-6	residues (petroleum), thermal cracked;residues, petroleum, thermal cracked;residues(petroleum),thermalcracked;residues (petroleum), thermal cracked residues, petroleum, thermal cracked residues(petroleum),thermalcracked	Excluded (petroleum product)	NO	10	NO	NO	10	TRUE	10	10	High		TRUE	300	100	YES	YES	TRUE	TRUE	1	1		HARMON	CARC		x		x	10	10	10	10	6	10	6	6	6	6	6	6		c1cccc2cc3ccc4cccc5ccc(c12)c3c45	C20H12	252.29	6.13	10.859	-4.729	0.904
64741-81-7	distillates (petroleum), heavy thermal cracked;distillates, petroleum, heavy thermal cracked;distillates(petroleum),heavythermal cracked;distillates (petroleum), heavy thermal cracked distillates, petroleum, heavy thermal cracked distillates(petroleum),heavythermal cracked	Excluded (petroleum product)	NO	10	NO	NO	10	TRUE	10	10	High		TRUE	300	100	YES	YES	TRUE	TRUE	1	1		HARMON	CARC		x		x	10	10	10	10	6	10	6	6	6	6	6	6		c1cccc2cc3ccc4cccc5ccc(c12)c3c45	C20H12	252.29	6.13	10.859	-4.729	0.904
64742-04-7	extracts (petroleum), heavy paraffinic distillate solvent;extracts, petroleum, heavy paraffinic distillate solvent;extracts(petroleum),heavy paraffinic distillatesolvent;distillate aromatic extract;extracts (petroleum), heavy paraffinic distillate solvent extracts, petroleum, heavy paraffinic distillate solvent extracts(petroleum),heavy paraffinic distillatesolvent distillate aromatic extract	Excluded (petroleum product)	NO	10	NO	NO	10	TRUE	10	10	High		TRUE	300	100	YES	YES	TRUE	TRUE	1	1		HARMON	CARC		x		x	10	10	10	10	6	10	6	6	6	6	6	6		c1cccc2cc3ccc4cccc5ccc(c12)c3c45	C20H12	252.29	6.13	10.859	-4.729	0.904
64742-59-2	gas oils (petroleum), hydrotreated vacuum;gas oils, petroleum, hydrotreated vacuum;gas oils, petroleum, hydrotreated, vacuum;gasoils(petroleum),hydrotreatedvacuum;gas oils (petroleum), hydrotreated vacuum gas oils, petroleum, hydrotreated vacuum gas oils, petroleum, hydrotreated, vacuum gasoils(petroleum),hydrotreatedvacuum	Excluded (petroleum product)	NO	10	NO	NO	10	TRUE	10	10	High		TRUE	300	100	YES	YES	TRUE	TRUE	1	1		HARMON	CARC		x		x	10	10	10	10	6	10	6	6	6	6	6	6		c1cccc2cc3ccc4cccc5ccc(c12)c3c45	C20H12	252.29	6.13	10.859	-4.729	0.904
64742-65-0	distillates (petroleum), solvent-dewaxed heavy paraffinic;distillates, petroleum, solvent-dewaxed heavy paraffinic;distillates, petroleum, solvent dewaxed heavy paraffinic;distillates(petroleum),solventdewaxedheavy paraffinic,ifthey contain>3%w/w dmsoextract;distillates (petroleum), solvent-dewaxed heavy paraffinic distillates, petroleum, solvent-dewaxed heavy paraffinic distillates, petroleum, s…	Excluded (petroleum product)	NO	10	NO	NO	10	TRUE	10	10	High		TRUE	300	100	YES	YES	TRUE	TRUE	1	1		HARMON	CARC		x		x	10	10	10	10	6	10	6	6	6	6	6	6		c1cccc2cc3ccc4cccc5ccc(c12)c3c45	C20H12	252.29	6.13	10.859	-4.729	0.904
64742-78-5	residues (petroleum), hydrodesulfurized atmospheric tower;residues, petroleum, hydrodesulfurized atmospheric tower;residues(petroleum),hydrodesulfurisedatmospherictower;residues (petroleum), hydrodesulfurized atmospheric tower residues, petroleum, hydrodesulfurized atmospheric tower residues(petroleum),hydrodesulfurisedatmospherictower	Excluded (petroleum product)	NO	10	NO	NO	10	TRUE	10	10	High		TRUE	300	100	YES	YES	TRUE	TRUE	1	1		HARMON	CARC		x		x	10	10	10	10	6	10	6	6	6	6	6	6		c1cccc2cc3ccc4cccc5ccc(c12)c3c45	C20H12	252.29	6.13	10.859	-4.729	0.904
64742-86-5	gas oils (petroleum), hydrodesulfurized heavy vacuum;gas oils, petroleum, hydrodesulfurized heavy vacuum;gas oils, petroleum, hydrodesulfurized, heavy vacuum;gasoils(petroleum),hydrodesulfurisedheavy vacuum;gas oils (petroleum), hydrodesulfurized heavy vacuum gas oils, petroleum, hydrodesulfurized heavy vacuum gas oils, petroleum, hydrodesulfurized, heavy vacuum gasoils(petroleum),hydrodesulfuris…	Excluded (petroleum product)	NO	10	NO	NO	10	TRUE	10	10	High		TRUE	300	100	YES	YES	TRUE	TRUE	1	1		HARMON	CARC		x		x	10	10	10	10	6	10	6	6	6	6	6	6		c1cccc2cc3ccc4cccc5ccc(c12)c3c45	C20H12	252.29	6.13	10.859	-4.729	0.904
80-05-7	phenol, 4,4'-(1-methylethylidene)bis-;2,2-bis (4'-hydroxyphenyl) propane;bisphenol a;diphenylolpropane;bis-phenol a;bisphenol;phenol, 4,4 -(1-methylethylidene)bis-;phenol, 4,4’-(1-methylethylidene)bis-;4,4'-isopropylidenediphenol;bisphenol a (bpa);4,4'-propane-2,2-diyldiphenol;bisphenola(4,4?isopropylidenediphenol);4,4'-(1-methylethylidene)bisphenol;phenol, 4,4'-isopropylidenedi-;2,2-bis(4-hydrox…	YES (Step 1)	NO	10	NO	NO	10	TRUE	10	10	High		TRUE	300	100	YES	YES	TRUE	TRUE	1	1		HARMON	REPR		x	x	x	10	10	10	10	10	10	10	10	10	10	10	10		CC(C)(c1ccc(O)cc1)c1ccc(O)cc1	C15H16O2	228.27	3.32	12	-8.68	0.263
51-03-6	piperonyl butoxide;piperonyl butoxide in solvent;pyrenone 606;1,3-benzodioxole, 5-[[2-(2-butoxyethoxy)ethoxy]methyl]-6-propyl-;2-(2-butoxyethoxy)ethyl 6-propylpiperonyl ether;piperonylbutoxide;5-{[2-(2-butoxyethoxy)ethoxy]methyl}-6-propyl-1,3-benzodioxole;1,3-benzodioxole, 5- 2-(2-butoxyethoxy)ethoxy methyl -6-propyl-;1,3-benzodioxole, 5-((2-(2-butoxyethoxy)ethoxy)methyl)-6-propyl-;toluene, .alph…	YES (Step 1)	NO	10	YES	NO	10	TRUE	10	10	High (Carc. Cat 2 proposed by BPC)		TRUE	300	100	YES	YES	TRUE	TRUE	1	1		OTH-NO	REPR		x	x	x	10	10	10	10	10	10	10	10	10	10	10	10		CCCCOCCOCCOCc1cc2c(cc1CCC)OCO2	C19H30O5	338.42	4.75	12	-7.25	0.619
108-78-1	2,4,6-triamino-1,3,5-triazine;melamine;1,3,5-triazine-2,4,6-triamine;[1,3,5]triazine-2,4,6-triamine;s-triazine, 4,6-diamino-1,2-dihydro-2-imino-;2,4,6-triamino-1,3,5-triazine melamine 1,3,5-triazine-2,4,6-triamine [1,3,5]triazine-2,4,6-triamine s-triazine, 4,6-diamino-1,2-dihydro-2-imino-	YES (Step 1)	YES	9	NO	NO	10	TRUE	10	10	High		TRUE	290	95	YES	YES	TRUE	TRUE	15	15		IARC	CARC		x	x	x	6	10	10	10	10	10	10	10	10	10	10	10		Nc1nc(N)nc(N)n1	C3H6N6	126.12	-1.37	10.754	-12.124	0.000691
64742-05-8	extracts (petroleum), light paraffinic distillate solvent;extracts, petroleum, light paraffinic distillate solvent;extracts(petroleum),light paraffinicdistillate solvent;extracts (petroleum), light paraffinic distillate solvent extracts, petroleum, light paraffinic distillate solvent extracts(petroleum),light paraffinicdistillate solvent	Excluded (petroleum product)	NO	9	NO	NO	10	TRUE	10	10	High		TRUE	290	95	YES	YES	TRUE	TRUE	15	15		HARMON	CARC		x		x	10	10	10	10	6	10	6	6	6	6	6	6		c1cccc2cc3ccc4cccc5ccc(c12)c3c45	C20H12	252.29	6.13	10.859	-4.729	0.904
64742-10-5	extracts (petroleum), residual oil solvent;extracts, petroleum, residual oil solvent;extracts (petroleum), residual oil solvent extracts, petroleum, residual oil solvent	Excluded (petroleum product)	NO	9	NO	NO	10	TRUE	10	10	High		TRUE	290	95	YES	YES	TRUE	TRUE	15	15		JOINT	CARC		x	x		10	10	6	6	6	6	6	6	6	10	6	6		CCCc1cccc2c1cc1cc(CCC)c3cccc4ccc2c1c34	C26H24	336.45	9.17	12	-2.83	2.31
64742-56-9	distillates (petroleum), solvent-dewaxed light paraffinic;distillates, petroleum, solvent-dewaxed light paraffinic;distillates, petroleum, solvent dewaxed light paraffinic;distillates(petroleum),solventdewaxedlight paraffinic,iftheycontain>3%w/wdmso extract;solvent-dewaxed light paraffinic distillates (petroleum);distillates (petroleum), solvent-dewaxed light paraffinic distillates, petroleum, so…	Excluded (petroleum product)	NO	9	NO	NO	10	TRUE	10	10	High		TRUE	290	95	YES	YES	TRUE	TRUE	15	15		HARMON	CARC		x		x	10	10	10	10	6	10	6	6	6	6	6	6		c1cccc2cc3ccc4cccc5ccc(c12)c3c45	C20H12	252.29	6.13	10.859	-4.729	0.904
25637-99-4	hexabromocyclododecane;1,1,2,2,3,3-hexabromocyclododecane;cyclododecane, hexabromo-;hexabromocyclododecane 1,1,2,2,3,3-hexabromocyclododecane cyclododecane, hexabromo-	YES (Step 1)	NO	8	NO	NO	10	TRUE	10	10	High		TRUE	280	90	YES	YES	TRUE	TRUE	19	19		HARMON	REPR		x	x	x	10	10	10	10	10	10	10	10	10	10	10	10		BrC1(Br)CCCCCCCCCC(Br)(Br)C1(Br)Br	C12H18Br6	641.72	7.86	12	-4.14	7.01
64741-96-4	distillates (petroleum), solvent-refined heavy naphthenic;distillates, petroleum, solvent-refined heavy naphthenic;distillates, petroleum, solvent refined heavy naphthenic;distillates(petroleum),solventrefinedheavy naphthenic,iftheycontain>3%w/wdmso extract;distillates (petroleum), solvent-refined (mild) heavy naphthenic (9ci);distillates (petroleum), solvent-refined heavy naphthenic distillates,…	Excluded (petroleum product)	NO	8	NO	NO	10	TRUE	10	10	High		TRUE	280	90	YES	YES	TRUE	TRUE	19	19		HARMON	CARC		x		x	10	10	10	10	6	10	6	6	6	6	6	6		c1cccc2cc3ccc4cccc5ccc(c12)c3c45	C20H12	252.29	6.13	10.859	-4.729	0.904
63449-39-8	chlorinated paraffins (c23, 43% chlorine)	YES (Step 1)	NO	8	NO	NO	10	TRUE	10	10	Low		TRUE	280	90	YES	YES	TRUE	TRUE	19	19		OTH-NO	CARC-STOT RE		x	x		10	6	6	6	6	6	10	10	3	10	3	10		CCCC(Cl)CCC(Cl)CCC(Cl)CCC(Cl)CCC(Cl)CCC(Cl)CCC(C)Cl	C23H41Cl7	565.72	12	12	0	983
101-02-0	triphenyl phosphite;phosphorous acid, triphenyl ester;triphenyl ester, phosphorous acid;phenyl phosphite, ((c6h5o)3p);tpp;phenyl phosphite ((c6h5o)3p) (6ci,7ci);triphenyl phosphite phosphorous acid, triphenyl ester triphenyl ester, phosphorous acid phenyl phosphite, ((c6h5o)3p) tpp phenyl phosphite ((c6h5o)3p) (6ci,7ci)	YES (Step 1)	NO	7	NO	NO	10	TRUE	10	10	High		TRUE	270	85	YES	YES	TRUE	TRUE	22	22		JOINT	STOT RE		x	x	x	10	10	10	10	10	10	6	6	10	6	10	6		c1ccccc1OP(Oc1ccccc1)Oc1ccccc1	C18H15O3P	310.27	6.62	11.275	-4.655	4.04
119-47-1	2,2'-methylenebis(6-t-butyl-4-methylphenol);phenol, 2,2'-methylenebis[6-(1,1-dimethylethyl)-4-methyl-;2,2'-methylenebis(4-methyl-6-tert-butylphenol);anti oxidant 2246;phenol, 2,2 -methylenebis[6-(1,1-dimethylethyl)-4-methyl-;bis (2-hydroxy-3tert-butyl-5-methylphenyl) metha;6,6’-di-tert-butyl-2,2’-methylenedi-p-cresol;2,2'-methylenebis(6-tert-butyl-p-cresol);phenol, 2,2’-methylenebis[6-(1,1-dimeth…	YES (Step 1)	YES	7	NO	NO	10	TRUE	10	10	High		TRUE	270	85	YES	YES	TRUE	TRUE	22	22		JOINT	REPR		x	x	x	10	10	10	10	10	10	6	6	10	6	10	6		Cc1cc(Cc2cc(C)cc(C(C)(C)C)c2O)c(O)c(C(C)(C)C)c1	C23H32O2	340.48	6.25	12	-5.75	0.47
64741-97-5	distillates (petroleum), solvent-refined light naphthenic;distillates, petroleum, solvent-refined light naphthenic;distillates, petroleum, solvent refined light naphthenic;distillates(petroleum),solventrefinedlight naphthenic,iftheycontain>3%w/wdmso extract;distillates (petroleum), solvent-refined (mild) light naphthenic (9ci);distillates (petroleum), solvent-refined light naphthenic distillates,…	Excluded (petroleum product)	NO	7	NO	NO	10	TRUE	10	10	High		TRUE	270	85	YES	YES	TRUE	TRUE	22	22		HARMON	CARC		x		x	10	10	10	10	6	10	6	6	6	6	6	6		c1cccc2cc3ccc4cccc5ccc(c12)c3c45	C20H12	252.29	6.13	10.859	-4.729	0.904
68937-41-7	phenol, isopropylated, phosphate (3:1);reaction products of phosphorus oxychloride, phenol and isopropylated phenol.;phenol, isopropylated, phosphate (3:1) reaction products of phosphorus oxychloride, phenol and isopropylated phenol.	YES (Step 1)	YES	7	NO	NO	10	TRUE	10	10	High		TRUE	270	85	YES	YES	TRUE	TRUE	22	22		JOINT	REPR-STOT RE		x	x	x	10	10	10	10	10	10	10	10	6	10	6	10		CC(C)c1ccc(OP(=O)(Oc2ccc(C(C)C)cc2)Oc2ccc(C(C)C)cc2)cc1	C27H33O4P	452.5	9.07	12	-2.93	104
79-94-7	tetrabromobisphenol-a;2,2-bis(4-hydroxy-3,5-dibromophenyl)propane;phenol, 4,4'-(1-methylethylidene)bis[2,6-dibromo-;3,3',5,5'-tetrabromobisphenol a;4,4'-isopropylidenebis (2,6-dibromophenol);4,4'-isopropylidenebis(2,6-dibromophenol);phenol, 4,4 -(1-methylethylidene)bis[2,6-dibromo-;phenol, 4,4’-(1-methylethylidene)bis[2,6-dibromo-;2,2',6,6'-tetrabromo-4,4'-isopropylidenediphenol;4,4'-propane-2,2-…	YES (Step 1)	NO	7	NO	NO	10	TRUE	10	10	High		TRUE	270	85	YES	YES	TRUE	TRUE	22	22		IARC	CARC		x	x	x	10	10	10	10	10	10	6	6	10	10	10	10		CC(C)(c1cc(Br)c(O)c(Br)c1)c1cc(Br)c(O)c(Br)c1	C15H12Br4O2	543.88	7.2	12	-4.8	2.11
92-84-2	phenothiazine;10h-phenothiazine;phenothiazine(inn)anditscompounds;phenothiazine (10h-phenothiazine);contaverm;danikoropa;dibenzo-1,4-thiazine;dibenzothiazine;early bird wormer;ent 38;feeno;fenoverm;nemazene;nexarbol;nsc 2037;orimon;padophene;penthazine;phenegic;phenoverm;phenovis;phenoxur;phenthiazine;phenzeen;reconox;thiodiphenylamine;phenothiazine 10h-phenothiazine phenothiazine(inn)anditscompo…	Excluded - impurity	NO	7	NO	NO	10	TRUE	10	10	Low (affected by impurity)		TRUE	270	85	YES	YES	TRUE	TRUE	22	22		JOINT	STOT RE		x	x	x	6	10	10	10	10	10	6	6	10	6	10	6		c1cccc2c1Nc1ccccc1S2	C12H9NS	199.26	4.15	10.094	-5.944	0.82
101-68-8	benzene, 1,1'-methylenebis[4-isocyanato-;4,4'-methylenediphenyl diisocyanate;diphenyl methane diisocyanate;diphenylmethane diisocyanate (mdi);benzene, 1,1'-methylenebis 4-isocyanato-;benzene, 1,1’-methylenebis[4-isocyanato-;1,1'-methanediylbis(4-isocyanatobenzene);isocyanic acid, methylenedi-p-phenylene ester;benzene, 1,1'-methylenebisХ4-isocyanato-;4,4'-diphenylmethane diisocyanate;1,1'-methylen…	YES (Step 1)	NO	6.5	NO	NO	10	TRUE	10	10	High		TRUE	265	82.5	YES	YES	TRUE	TRUE	28	28		HARMON	CARC-STOT RE			x		6	6	6	6	6	6	6	6	6	6	10	6		O=C=Nc1ccc(Cc2ccc(N=C=O)cc2)cc1	C15H10N2O2	250.24	5.22	9.657	-4.437	3.48
100-01-6	4-nitroaniline;nitroaniline, 4-;nitroaniline, p-;benzenamine, 4-nitro-;p-nitroaniline;4-nitro-phenylamine;4-nitro-aniline;aniline, p-nitro-;4-nitrobenzenamine;4-nitroaniline nitroaniline, 4- nitroaniline, p- benzenamine, 4-nitro- p-nitroaniline 4-nitro-phenylamine 4-nitro-aniline aniline, p-nitro- 4-nitrobenzenamine	YES (Step 1)	NO	6	NO	NO	10	TRUE	10	10	High		TRUE	260	80	YES	YES	TRUE	TRUE	29	29		HARMON	STOT RE			x	x	6	6	10	10	10	10	6	6	10	10	10	10		Nc1ccc(N(=O)=O)cc1	C6H6N2O2	138.12	1.39	8.678	-7.288	0.0729
101-96-2	n,n'-di-sec-butyl-p-phenylenediamine;n,n'-di-s-butyl-p-phenylenediamine;1,4-benzenediamine, n,n’-bis(1-methylpropyl)-;1,4-benzenediamine, n,n'-bis(1-methylpropyl)-;n,n'-di(butan-2-yl)benzene-1,4-diamine;p-phenylenediamine, n,n'-di-sec-butyl-;n,n'-di-sec-butyl-p-phenylene;n,n'-di-sec-butylbenzene-1,4-diamine;n,n'-di-sec-butyl-p-phenylenediamine n,n'-di-s-butyl-p-phenylenediamine 1,4-benzenediamine…	YES (Step 1)	NO	6	NO	NO	10	TRUE	10	10	High		TRUE	260	80	YES	YES	TRUE	TRUE	29	29		JOINT	STOT RE		x	x	x	6	10	10	10	10	10	6	6	10	6	10	6		CCC(C)Nc1ccc(NC(C)CC)cc1	C14H24N2	220.34	3.5	9.638	-6.138	0.479
112-49-2	2,5,8,11-tetraoxadodecane;1,2-bis(2-methoxyethoxy)ethane;triethylene glycol dimethyl ether;1,2bis(2methoxyethoxy)ethane;triethylene glycoldimethylether (tegdme);2,5,8,11-tetraoxadodecane 1,2-bis(2-methoxyethoxy)ethane triethylene glycol dimethyl ether 1,2bis(2methoxyethoxy)ethane triethylene glycoldimethylether (tegdme)	YES (Step 1)	NO	6	NO	NO	10	TRUE	10	10	High		TRUE	260	80	YES	YES	TRUE	TRUE	29	29		HARMON	REPR			x		3	3	6	6	6	6	6	6	10	6	10	6		COCCOCCOCCOC	C8H18O4	178.22	-0.76	6.118	-6.878	0.023
119313-12-1	1-butanone, 2-(dimethylamino)-1-[4-(4-morpholinyl)phenyl]-2-(phenylmethyl)-;2-benzyl-2-dimethylamino-4’-morpholinobutyrophenone;2-benzyl-2-dimethylamino-4'-morpholinobutyrophenone;2-benzyl-2-(dimethylamino)-1-(4-morpholinophenyl)-1-butanone;2-benzyl-2-(dimethylamino)-1-(4-morpholinophenyl)butanone-1;2-benzyl-2-(dimethylamino)-1-[4-(4-morpholinyl)phenyl]-1-butanone;2-benzyl-2-n,n-dimethylamino-1-(…	YES (Toxicity Score of 10 confirmed)	NO	6	NO	NO	10	TRUE	10	10	High (Repr. Cat 2 proposed harmonised classification)		TRUE	260	80	YES	YES	TRUE	TRUE	29	29		OTH-YES	REPR		x	x	x	10	10	10	10	10	10	10	10	10	6	10	6		CCC(Cc1ccccc1)(C(=O)c1ccc(N2CCOCC2)cc1)N(C)C	C23H30N2O2	366.48	4.5	12	-7.5	0.0581
123-30-8	4-aminophenol (4-hydroxyaniline);phenol, 4-amino-;p-aminophenol;4-amino-phenol;4-hydroxy-aniline;4-aminophenol;aminophenol, p-;phenol, p-amino-;4-aminophenol (4-hydroxyaniline) phenol, 4-amino- p-aminophenol 4-amino-phenol 4-hydroxy-aniline 4-aminophenol aminophenol, p- phenol, p-amino-	YES (Step 1)	NO	6	NO	NO	10	TRUE	10	10	High		TRUE	260	80	YES	YES	TRUE	TRUE	29	29		HARMON	MUTA			x	x	6	6	6	6	10	6	6	6	10	6	10	6		Nc1ccc(O)cc1	C6H7NO	109.12	0.04	7.873	-7.833	0.0118
127-47-9	retinol acetate;retinol, acetate;retinyl acetate;o~15~-acetylretinoic acid;[(2e,4e,6e,8e)-3,7-dimethyl-9-(2,6,6-trimethylcyclohexen-1-yl)nona-2,4,6,8-tetraenyl] acetate;retinol acetate retinol, acetate retinyl acetate o~15~-acetylretinoic acid [(2e,4e,6e,8e)-3,7-dimethyl-9-(2,6,6-trimethylcyclohexen-1-yl)nona-2,4,6,8-tetraenyl] acetate	YES (Step 1)	NO	6	NO	NO	10	TRUE	10	10	High		TRUE	260	80	YES	YES	TRUE	TRUE	29	29		JOINT	REPR		x	x	x	6	10	10	10	10	10	10	10	3	10	6	10		CC1CCCC(C)(C)C=1C=CC(C)=CC=CC(C)=CC(=O)OC(C)=O	C22H30O3	342.45	7.19	8.787	-1.597	70.5
131538-00-6	1-propanethiol, 2,3-bis[(2-mercaptoethyl)thio]-;2,3-bis((2-mercaptoethyl)thio)-1-propanethiol;1-propanethiol, 2,3-bis[(2-mercaptoethyl)thio]- 2,3-bis((2-mercaptoethyl)thio)-1-propanethiol	YES (Step 1)	NO	6	NO	YES	10	TRUE	10	10	High		TRUE	260	80	YES	YES	TRUE	TRUE	29	29		HARMON	STOT RE		x	x	x	6	10	10	10	10	10	6	6	10	6	10	6		SCCSCC(CS)SCCS	C7H16S5	260.52	2.73	10.054	-7.324	0.0386
131-56-6	2,4-dihydroxybenzophenone;(2,4-dihydroxyphenyl)(phenyl)methanone;benzophenone, 2,4-hydroxy;methanone, (2,4-dihydroxyphenyl)phenyl-;benzophenone, 2,4-dihydroxy-;2,4-dihydroxybenzophenone (methanone, (2,4-dihydroxyphenyl)phenyl-) (4-benzoylbenzene-1,3-diol);(2,4-dihydroxyphenyl)phenylmethanone;2,4-dihydroxybenzophenone (2,4-dihydroxyphenyl)(phenyl)methanone benzophenone, 2,4-hydroxy methanone, (2,4…	YES (Step 1)	NO	6	NO	NO	10	TRUE	10	10	High		TRUE	260	80	YES	YES	TRUE	TRUE	29	29		INDIV	REPR		x	x	x	10	10	10	10	10	10	10	10	10	10	10	10		Oc1ccc(C(=O)c2ccccc2)c(O)c1	C13H10O3	214.21	2.96	11.925	-8.965	0.0235
143-24-8	2,5,8,11,14-pentaoxapentadecane;bis(2-(2-methoxyethoxy)ethyl) ether;2,5,8,11,14-pentaoxapentadecane bis(2-(2-methoxyethoxy)ethyl) ether	YES (Step 1)	NO	6	NO	NO	10	TRUE	10	10	High		TRUE	260	80	YES	YES	TRUE	TRUE	29	29		JOINT	REPR			x	x	6	6	10	10	10	10	10	10	10	10	10	10		COCCOCCOCCOCCOC	C10H22O5	222.27	-1.03	7.657	-8.687	0.0163
18600-59-4	4h-3,1-benzoxazin-4-one, 2,2'- (1,4-phenylene)bis-;4h-3,1-benzoxazin-4-one, 2,2'-(1,4-phenylene)bis-;2,2-(1,4-phenylene)bis((4h-3,1-benzoxazine-4-one);2,2'-(1,4-phenylene)bis-(4h-3,1-benzoxazin-4-one);4h-3,1-benzoxazin-4-one, 2,2'- (1,4-phenylene)bis- 4h-3,1-benzoxazin-4-one, 2,2'-(1,4-phenylene)bis- 2,2-(1,4-phenylene)bis((4h-3,1-benzoxazine-4-one) 2,2'-(1,4-phenylene)bis-(4h-3,1-benzoxazin-4-on…	YES (Step 1)	NO	6	NO	NO	10	TRUE	10	10	High		TRUE	260	80	YES	YES	TRUE	TRUE	29	29		JOINT	STOT RE		x	x	x	10	10	10	10	10	10	10	10	10	10	10	10		O=C1c2ccccc2N=C(c2ccc(C3=Nc4ccccc4C(=O)O3)cc2)O1	C22H12N2O4	368.32	2.09	11.563	-9.473	0.354
192268-65-8	phosphorothioic acid, o,o,o-triphenyl esters, tert-bu derivs;phosphorothioic acid, o,o,o-triphenyl esters, tert-bu derivs.;a mixture of: triphenylthiophosphate and tertiary butylated phenyl derivatives;reaction mass of: triphenylthiophosphate and tertiary butylated phenyl derivatives;tka 40116;phosphorothioic acid, o,o,o-triphenyl esters, tert-bu derivs phosphorothioic acid, o,o,o-triphenyl ester…	YES (Step 1)	NO	6	NO	NO	10	TRUE	10	10	High		TRUE	260	80	YES	YES	TRUE	TRUE	29	29		JOINT	REPR		x	x	x	10	10	10	10	10	10	10	10	6	10	6	10		CC(C)(C)c1cccc(OP(=S)(Oc2ccccc2)Oc2ccccc2)c1	C22H23O3PS	398.44	8.38	11.592	-3.212	77.6
25013-16-5	phenol, (1,1-dimethylethyl)-4-methoxy-;butylated hydroxyanisole;2-tert-butyl-4-methoxyphenol;butylated hydroxyanisol (bha);tert-butyl-4-methoxyphenol;1,1-dimethylethyl-4-methoxyphenol;phenol, (1,1-dimethylethyl)-4-methoxy- butylated hydroxyanisole 2-tert-butyl-4-methoxyphenol butylated hydroxyanisol (bha) tert-butyl-4-methoxyphenol 1,1-dimethylethyl-4-methoxyphenol	YES (Step 1)	NO	6	NO	NO	10	TRUE	10	10	High		TRUE	260	80	YES	YES	TRUE	TRUE	29	29		IARC	CARC			x		6	6	6	6	6	6	6	6	10	6	10	6		CC(C)(C)c1cc(OC)ccc1O	C11H16O2	180.23	3.5	8.956	-5.456	0.388
25155-23-1	phenol, dimethyl-, 1,1',1''-phosphate;dimethylphenol phosphate (3:1);phenol, dimethyl-, phosphate (3:1);2,3-dimethylphenyl 2,4-dimethylphenyl 3,5-dimethylphenyl phosphate;phenol, dimethyl-, 1,1',1''-phosphate dimethylphenol phosphate (3:1) phenol, dimethyl-, phosphate (3:1) 2,3-dimethylphenyl 2,4-dimethylphenyl 3,5-dimethylphenyl phosphate	YES (Step 1)	NO	6	NO	NO	10	TRUE	10	10	High		TRUE	260	80	YES	YES	TRUE	TRUE	29	29		HARMON	REPR		x	x	x	10	10	10	10	10	10	10	10	10	10	10	10		Cc1cccc(OP(=O)(Oc2ccc(C)cc2C)Oc2cc(C)cc(C)c2)c1C	C24H27O4P	410.42	7.98	12	-4.02	8.33
302-17-0	chloral hydrate;2,2,2-trichloro-1,1-ethanediol;1,1-ethanediol, 2,2,2-trichloro-;choral hydrate;2,2,2-trichloroethane-1,1-diol;2,2,2trichloroethane1,1diol	YES (Step 1)	NO	6	NO	NO	10	TRUE	10	10	High		TRUE	260	80	YES	YES	TRUE	TRUE	29	29		IARC	CARC			x		6	6	6	6	6	6	6	6	10	6	10	6		OC(O)C(Cl)(Cl)Cl	C2H3Cl3O2	165.4	0.99	7.622	-6.632	0.0649
330-54-1	diuron;urea, n'-(3,4-dichlorophenyl)-n,n-dimethyl-;3-(3,4-dichlorophenyl)-1,1-dimethylurea;urea, n-(3,4-dichlorophenyl)-n,n-dimethyl-;urea, n’-(3,4-dichlorophenyl)-n,n-dimethyl-;diuron(iso);n'-(3,4-dichlorophenyl)-n,n-dimethylurea;urea, 3-(3,4-dichlorophenyl)-1,1-dimethyl-;diuron (95);diuron (80);diuron (98.6);diuron (96.8);diuron (urea, n'-(3,4-dichlorophenyl)-n,n-dimethyl-) (3-(3,4-dichlorophen…	YES (Step 1)	NO	6	NO	NO	10	TRUE	10	10	High		TRUE	260	80	YES	YES	TRUE	TRUE	29	29		HARMON	CARC-STOT RE		x	x	x	10	10	10	10	10	10	10	10	10	10	10	10		CN(C)C(=O)Nc1ccc(Cl)c(Cl)c1	C9H10Cl2N2O	233.09	2.68	10.366	-7.686	0.113
34432-92-3	n-ethyl-n-[2-[1-(2-methylpropoxy)ethoxy]ethyl]-4-(phenylazo)aniline;n-ethyl-n-{2-[1-(2-methylpropoxy)ethoxy]ethyl}-4-(phenyldiazenyl)aniline;benzenamine, n-ethyl-n-[2-[1-(2-methylpropoxy)ethoxy]ethyl]-4-(phenylazo)-;n-ethyl-n-[2-(1-isobutoxyethoxy)ethyl]-4-(phenyldiazenyl)aniline;n-ethyl-n-[2-[1-(2-methylpropoxy)ethoxy]ethyl]-4-(phenylazo)aniline n-ethyl-n-{2-[1-(2-methylpropoxy)ethoxy]ethyl}-4-(…	YES (Step 1)	NO	6	NO	NO	10	TRUE	10	10	High		TRUE	260	80	YES	YES	TRUE	TRUE	29	29		JOINT	STOT RE		x	x	x	10	10	10	10	10	10	10	10	10	10	10	6		CCN(CCOC(C)OCC(C)C)c1ccc(N=Nc2ccccc2)cc1	C22H31N3O2	369.48	6.06	12	-5.94	1.52
4433-79-8	butanamide, n-(4-chloro-2,5-dimethoxyphenyl)-3-oxo-;4'-chloro-2',5'-dimethoxyacetoacetanilide;n-(4-chloro-2,5-dimethoxyphenyl)-3-oxobutanamide;acetoacetanilide, 4'-chloro-2',5'-dimethoxy-;naphtol as irg;butanamide, n-(4-chloro-2,5-dimethoxyphenyl)-3-oxo;butanamide, n-(4-chloro-2,5-dimethoxyphenyl)-3-oxo- 4'-chloro-2',5'-dimethoxyacetoacetanilide n-(4-chloro-2,5-dimethoxyphenyl)-3-oxobutanamide ac…	YES (Toxicity Score of 10 confirmed)	NO	6	NO	NO	10	TRUE	10	10	Low		TRUE	260	80	YES	YES	TRUE	TRUE	29	29		OTH-YES	STOT RE		x	x	x	10	10	10	10	10	10	10	10	10	10	10	10		CC(=O)CC(=O)Nc1cc(OC)c(Cl)cc1OC	C12H14ClNO4	271.69	1.25	12	-10.75	0.183
561-41-1	4,4'-bis(dimethylamino)-4''-(methylamino)trityl alcohol;bis[4-(dimethylamino)phenyl][4-(methylamino)phenyl]methanol;4,4'-bis(dimethylamino)-4''-(methylamino)trityl alcohol bis[4-(dimethylamino)phenyl][4-(methylamino)phenyl]methanol	YES (Step 1)	NO	6	NO	NO	10	TRUE	10	10	High		TRUE	260	80	YES	YES	TRUE	TRUE	29	29		JOINT	CARC		x	x	x	10	10	10	10	10	10	10	10	10	10	10	10		CNc1ccc(C(O)(c2ccc(N(C)C)cc2)c2ccc(N(C)C)cc2)cc1	C24H29N3O	375.49	4.37	12	-7.63	0.672
56358-09-9	2-naphthalenamine, n-(2-ethylhexyl)-1-[[2-methyl-4-[(2-methylphenyl)azo]phenyl]azo]-;n-(2-ethylhexyl)-1-[[2-methyl-4-[(2-methylphenyl)azo]phenyl]azo]naphthalen-1-amine;n-(2-ethylhexyl)-1-({2-methyl-4-[(2-methylphenyl)diazenyl]phenyl}diazenyl)-1,2-dihydronaphthalen-1-amine;2-naphthalenamine, n-(2-ethylhexyl)-1-[[2-methyl-4-[(2-methylphenyl)azo]phenyl]azo]- n-(2-ethylhexyl)-1-[[2-methyl-4-[(2-methy…	YES (Step 1)	NO	6	NO	NO	10	TRUE	10	10	High		TRUE	260	80	YES	YES	TRUE	TRUE	29	29		JOINT	STOT RE		x	x		10	10	3	6	6	6	10	10	3	10	3	10		CCCCC(CC)CNC1(N=Nc2ccc(N=Nc3ccccc3C)cc2C)CC=Cc2ccccc12	C32H39N5	493.66	11.97	12	-0.03	11400
603-35-0	triphenylphosphine;phosphine, triphenyl-;triphenylphosphane;triphenyl phosphine;triphenylphosphine phosphine, triphenyl- triphenylphosphane triphenyl phosphine	YES (Step 1)	NO	6	NO	NO	10	TRUE	10	10	High		TRUE	260	80	YES	YES	TRUE	TRUE	29	29		JOINT	STOT RE		x	x	x	10	10	10	10	10	10	10	10	10	10	10	6		c1ccccc1P(c1ccccc1)c1ccccc1	C18H15P	262.27	5.69	11.724	-6.034	2.77
615-50-9	2 5-diaminotoluene sulphate (ptd)	YES (Step 1)	NO	6	NO	NO	10	TRUE	10	10	High		TRUE	260	80	YES	YES	TRUE	TRUE	29	29		JOINT	STOT RE			x	x	6	6	6	6	10	6	6	6	10	6	10	6		Cc1cc(N)ccc1N	C7H10N2	122.16	0.16	7.677	-7.517	0.0121
6364-17-6	2,3-dihydro-2,2-dimethyl-1h-perimidine;perimidine, 2,3-dihydro-2,2-dimethyl;2,3-dihydro-2,2-dimethyl-1h-perimidine perimidine, 2,3-dihydro-2,2-dimethyl	YES (Step 1)	NO	6	NO	YES	10	TRUE	10	10	High		TRUE	260	80	YES	YES	TRUE	TRUE	29	29		HARMON	STOT RE			x		6	6	6	6	6	6	6	6	10	6	10	6		CC1(C)Nc2cccc3cccc(c23)N1	C13H14N2	198.25	3.4	9.021	-5.621	0.506
64741-52-2	distillates (petroleum), light naphthenic;distillates, petroleum, light naphthenic;distillates(petroleum),lightnaphthenic;distillates (petroleum), light naphthenic distillates, petroleum, light naphthenic distillates(petroleum),lightnaphthenic	Excluded (petroleum product)	NO	6	NO	NO	10	TRUE	10	10	High		TRUE	260	80	YES	YES	TRUE	TRUE	29	29		HARMON	CARC		x		x	10	10	10	10	6	10	6	6	6	6	6	6		c1cccc2cc3ccc4cccc5ccc(c12)c3c45	C20H12	252.29	6.13	10.859	-4.729	0.904
64741-53-3	distillates (petroleum), heavy naphthenic;distillates, petroleum, heavy naphthenic;distillates(petroleum),heavynaphthenic;distillates (petroleum), heavy naphthenic distillates, petroleum, heavy naphthenic distillates(petroleum),heavynaphthenic	Excluded (petroleum product)	NO	6	NO	NO	10	TRUE	10	10	High		TRUE	260	80	YES	YES	TRUE	TRUE	29	29		HARMON	CARC		x		x	10	10	10	10	6	10	6	6	6	6	6	6		c1cccc2cc3ccc4cccc5ccc(c12)c3c45	C20H12	252.29	6.13	10.859	-4.729	0.904
64742-11-6	extracts (petroleum), heavy naphthenic distillate solvent;extracts, petroleum, heavy naphthenic distillate solvent;extracts(petroleum),heavynaphthenic distillatesolvent;extracts (petroleum), heavy naphthenic distillate solvent extracts, petroleum, heavy naphthenic distillate solvent extracts(petroleum),heavynaphthenic distillatesolvent	Excluded (petroleum product)	NO	6	NO	NO	10	TRUE	10	10	High		TRUE	260	80	YES	YES	TRUE	TRUE	29	29		HARMON	CARC		x		x	10	10	10	10	6	10	6	6	6	6	6	6		c1cccc2cc3ccc4cccc5ccc(c12)c3c45	C20H12	252.29	6.13	10.859	-4.729	0.904
6786-83-0	1-naphthalenemethanol, ?,?-bis[4-(dimethylamino)phenyl]-4-(phenylamino)-;±,±-bis[4-(dimethylamino)phenyl]-4-(phenylamino)naphthalene-1-methanol;bis[4-(dimethylamino)phenyl][4-(phenylamino)naphthalen-1-yl]methanol;1-naphthalenemethanol, .alpha.,.alpha.-bis[4-(dimethylamino)phenyl]-4-(phenylamino)-;?,?-bis[4-(dimethylamino)phenyl]-4-(phenylamino)naphthalene-1-methanol;1-naphthalenamine, 4- bis 4-(d…	YES (Toxicity Score of 10 confirmed)	NO	6	NO	NO	10	TRUE	10	10	Low		TRUE	260	80	YES	YES	TRUE	TRUE	29	29		OTH-YES	CARC-MUTA		x	x	x	10	10	10	10	10	10	10	10	10	10	10	10		CN(C)c1ccc(C(O)(c2ccc(N(C)C)cc2)c2ccc(Nc3ccccc3)c3ccccc23)cc1	C33H33N3O	487.61	7.21	12	-4.79	5.09
68-26-8	retinol;retinol, all-trans-;(2e,4e,6e,8e)-3,7-dimethyl-9-(2,6,6-trimethylcyclohexen-1-yl)nona-2,4,6,8-tetraen-1-ol;retinol (all-trans retinol) (vitamin a);3,7-dimethyl-9-(2,6,6-trimethyl-1-cyclohexen-1-yl)-2,4,6,8-nonate-traen-1-ol;retinol retinol, all-trans- (2e,4e,6e,8e)-3,7-dimethyl-9-(2,6,6-trimethylcyclohexen-1-yl)nona-2,4,6,8-tetraen-1-ol retinol (all-trans retinol) (vitamin a) 3,7-dimethyl…	YES (Step 1)	NO	6	NO	YES	10	TRUE	10	10	High		TRUE	260	80	YES	YES	TRUE	TRUE	29	29		JOINT	REPR				x	6	6	10	10	10	10	6	6	6	6	6	6		CC1CCCC(C)(C)C=1C=CC(C)=CC=CC(C)=CCO	C20H30O	286.44	5.68	8.004	-2.324	17.6
7069-42-3	retinol, propanoate;retinyl propionate;o~15~-propanoylretinoic acid;[(2e,4e,6e,8e)-3,7-dimethyl-9-(2,6,6-trimethylcyclohexen-1-yl)nona-2,4,6,8-tetraenyl] propionate;retinol, propanoate retinyl propionate o~15~-propanoylretinoic acid [(2e,4e,6e,8e)-3,7-dimethyl-9-(2,6,6-trimethylcyclohexen-1-yl)nona-2,4,6,8-tetraenyl] propionate	YES (Step 1)	NO	6	NO	YES	10	TRUE	10	10	High		TRUE	260	80	YES	YES	TRUE	TRUE	29	29		INDIV	REPR		x	x	x	10	10	10	10	10	10	10	10	3	10	6	10		CCC(=O)OC(=O)C=C(C)C=CC=C(C)C=CC1=C(C)CCCC1(C)C	C23H32O3	356.48	7.68	9.154	-1.474	97.1
71868-10-5	1-propanone, 2-methyl-1-[4-(methylthio)phenyl]-2-(4-morpholinyl)-;1-propanone, 2-methyl-1-[4-(methylthio)phenyl]-2-(4-4-morpholinyl)-;2-methyl-1-(4-methylthiophenyl)-2-morpholinopropan-1-one;2-methyl-1-[4-(methylthio)phenyl]-2-(4-morpholinyl)-1-propanone;2-methyl-1-[4-(methylthio)phenyl]-2-morpholino-1-propanone;2-methyl-1-[4-(methylthio)phenyl]-2-(morpholin-4-yl)propan-1-one;1-propanone, 2-methy…	YES (Step 1)	NO	6	NO	NO	10	TRUE	10	10	High		TRUE	260	80	YES	YES	TRUE	TRUE	29	29		JOINT	REPR		x	x	x	10	10	10	10	10	10	10	10	10	10	10	10		CC(C)(C(=O)c1ccc(SC)cc1)N1CCOCC1	C15H21NO2S	279.38	2.73	11.584	-8.854	0.114
77-09-8	phenolphthalein;phenolpthalein;phenolphthlein;3,3-bis-(4-hydroxy-phenyl)-3h-isobenzofuran-1-one;1(3h)-isobenzofuranone, 3,3-bis(4-hydroxyphenyl)-;3,3-bis(4-hydroxyphenyl)-2-benzofuran-1(3h)-one;3,3bis(4hydroxyphenyl)phthalide (phenolphthalein(inn));van;van ;phenolphtalein;3,3-bis(4-hydroxyphenyl)-1(3h)-isobenzofuranone;phenolphthalein (3,3-bis(4-hydroxyphenyl)-2-benzofuran-1(3h)-one);phenolphthal…	YES (Step 1)	NO	6	NO	NO	10	TRUE	10	10	High		TRUE	260	80	YES	YES	TRUE	TRUE	29	29		HARMON	CARC-MUTA-REPR		x	x	x	10	10	10	10	10	10	10	10	10	10	10	10		Oc1ccc(C2(c3ccc(O)cc3)c3ccccc3C(=O)O2)cc1	C20H14O4	318.31	2.41	12	-9.59	0.0622
79-81-2	o~15~-hexadecanoylretinoic acid	YES (Step 1)	NO	6	NO	NO	10	TRUE	10	10	High		TRUE	260	80	YES	YES	TRUE	TRUE	29	29		JOINT	REPR		x	x		10	10	6	6	6	6	10	10	3	10	3	10		CCCCCCCCCCCCCCCC(=O)OC(=O)C=C(C)C=CC=C(C)C=CC1=C(C)CCCC1(C)C	C36H58O3	538.82	12	12	0	6770
84-65-1	9,10-anthraquinone;9,10-anthracenedione;anthraquinone;anthracene-9,10-dione;9,10-anthraquinone 9,10-anthracenedione anthraquinone anthracene-9,10-dione	YES (Step 1)	NO	6	NO	NO	10	TRUE	10	10	High		TRUE	260	80	YES	YES	TRUE	TRUE	29	29		IARC	CARC			x	x	6	6	6	10	6	10	6	6	10	6	10	6		O=C1c2ccccc2C(=O)c2ccccc12	C14H8O2	208.2	3.39	9.407	-6.017	0.386
90-30-2	1-(n-phenylamino) naphthalene;1-naphthalenamine, n-phenyl-;n-phenyl-1-naphthylamine;phenyl-alpha-naphthylamine;n-1-naphthylaniline;n-phenylnaphthalen-1-amine;1-naphthylamine, n-phenyl-;1-(n-phenylamino) naphthalene 1-naphthalenamine, n-phenyl- n-phenyl-1-naphthylamine phenyl-alpha-naphthylamine n-1-naphthylaniline n-phenylnaphthalen-1-amine 1-naphthylamine, n-phenyl-	YES (Step 1)	NO	6	NO	NO	10	TRUE	10	10	High		TRUE	260	80	YES	YES	TRUE	TRUE	29	29		JOINT	STOT RE		x	x	x	6	10	10	10	10	10	6	6	10	6	10	6		c1ccccc1Nc1cccc2ccccc12	C16H13N	219.27	4.2	9.576	-5.376	2.21
90529-77-4	1,2,3-propanetriol, glycidyl ethers;glycerol, polymer with 1-chloro-2,3-epoxypropane;ge 100;1,2,3-propanetriol, glycidyl ethers glycerol, polymer with 1-chloro-2,3-epoxypropane ge 100	YES (Step 1)	NO	6	NO	NO	10	TRUE	10	10	High		TRUE	260	80	YES	YES	TRUE	TRUE	29	29		JOINT	MUTA-REPR		x	x	x	10	10	10	10	10	10	10	10	10	10	10	10		C(C1CO1)OCC(COCC1CO1)OCC1CO1	C12H20O6	260.27	-1.94	10.122	-12.062	0.00257
93924-32-4	foots oil (petroleum), clay-treated;footsoil(petroleum),claytreated,ifit contains>3%w/wdmsoextract;foots oil (petroleum), clay-treated footsoil(petroleum),claytreated,ifit contains>3%w/wdmsoextract	Excluded (petroleum product)	NO	6	NO	NO	10	TRUE	10	10	High		TRUE	260	80	YES	YES	TRUE	TRUE	29	29		HARMON	CARC			x		6	3	6	6	6	6	10	10	1	10	1	10		CCCCC(CC)CC(CCC)CCC(CCC)CC(C)CCC(C)CCC	C28H58	394.74	12	9.169	2.831	707
94-91-7	phenol, 2,2'-((1-methyl-1,2-ethanediyl)bis(nitri;phenol, 2,2’-[(1-methyl-1,2-ethanediyl)bis(nitrilomethylidyne)]bis-;±,±'-propylenedinitrilodi-o-cresol;2,2'-[propane-1,2-diylbis(nitrilomethylylidene)]diphenol;phenol, 2,2'-[(1-methyl-1,2-ethanediyl)bis(nitrilomethylidyne)]bis-;?,?'-propylenedinitrilodi-o-cresol;phenol, 2,2'- (1-methyl-1,2-ethanediyl)bis(nitrilomethylidyne) bis-;o-cresol, .alpha.,.…	YES (Step 1)	NO	6	NO	NO	10	TRUE	10	10	High		TRUE	260	80	YES	YES	TRUE	TRUE	29	29		JOINT	REPR		x	x	x	10	10	10	10	10	10	10	10	10	10	10	10		CC(CN=Cc1ccccc1O)N=Cc1ccccc1O	C17H18N2O2	282.32	2.52	12	-9.48	0.00988
95-70-5	2,5-diaminotoluene;2-methyl-p-phenylenediamine;toluene-2,5-diamine;1,4-benzenediamine, 2-methyl-;2-methylbenzene-1,4-diamine;2-methyl-1,4-benzenediamine;toluylendiamine;2-methyl-benzene-1,4-diamine;2,5-diaminotoluene 2-methyl-p-phenylenediamine toluene-2,5-diamine 1,4-benzenediamine, 2-methyl- 2-methylbenzene-1,4-diamine 2-methyl-1,4-benzenediamine toluylendiamine 2-methyl-benzene-1,4-diamine	YES (Step 1)	NO	6	NO	NO	10	TRUE	10	10	High		TRUE	260	80	YES	YES	TRUE	TRUE	29	29		JOINT	STOT RE			x	x	6	6	6	6	10	6	6	6	10	6	10	6		Cc1cc(N)ccc1N	C7H10N2	122.16	0.16	7.677	-7.517	0.0121
68915-96-8	distillates (petroleum), heavy straight-run;distillates, petroleum, heavy straight-run;distillates, petroleum, heavy straight run;distillates (petroleum), heavy straight-run distillates, petroleum, heavy straight-run distillates, petroleum, heavy straight run	Excluded (petroleum product)	NO	10	NO	NO	6	TRUE	10	10	High		TRUE	260	80	YES	YES	TRUE	TRUE	29	29		JOINT	STOT RE		x	x		10	10	6	6	6	6	10	10	3	10	3	10		CCCCCCCCCCCCCCCCCCCCCCCCCCCCCCCCCCCC	C36H74	506.94	12	12	0	12100
17354-14-2	9,10-anthracenedione, 1,4-bis(butylamino)-;1,4-bis(butylamino)anthraquinone;1,4-bis(butylamino)anthracene-9,10-dione;colouringagentci61554(solventblue35);anthraquinone, 1,4-bis(butylamino)-	YES (Step 1)	NO	6	NO	YES	10	TRUE	10	10	Low		TRUE	260	80	YES	YES	TRUE	TRUE	29	29		OTH-NO	MUTA		x	x	x	10	10	10	10	10	10	6	6	10	6	10	6		CCCCNc1ccc(NCCCC)c2c1C(=O)c1ccccc1C2=O	C22H26N2O2	350.44	7.2	12	-4.8	0.968
37640-57-6	1,3,5-triazine-2,4,6(1h,3h,5h)-trione, compd. with 1,3,5-triazine-2,4,6-triamine (1:1)	YES (Step 1)	YES	5.5	NO	NO	10	TRUE	10	10	High		TRUE	255	77.5	YES	YES	TRUE	TRUE	68	68		JOINT	STOT RE		x	x	x	6	10	10	10	10	10	10	10	10	10	10	10		Nc1nc(N)nc(N)n1	C3H6N6	126.12	-1.37	10.754	-12.124	0.000691
5873-54-1	2,4'-methylenediphenyl diisocyanate;benzene, 1-isocyanato-2-[(4-isocyanatophenyl)methyl]-;o-(p-isocyanatobenzyl)phenyl isocyanate;1-isocyanato-2-(4-isocyanatobenzyl)benzene;benzene, 1-isocyanato-2- (4-isocyanatophenyl)methyl -;isocyanic acid, diester with 2,4'-methylenediphenol;benzene, 1-isocyanato-2-Х(4-isocyanatophenyl)methylе-;2,4'-methylenediphenyl diisocyanate benzene, 1-isocyanato-2-[(4-is…	YES (Step 1)	NO	5.5	NO	NO	10	TRUE	10	10	High		TRUE	255	77.5	YES	YES	TRUE	TRUE	68	68		HARMON	CARC-STOT RE			x		6	6	6	6	6	6	6	6	6	6	10	6		O=C=Nc1ccccc1Cc1ccc(N=C=O)cc1	C15H10N2O2	250.24	5.22	9.657	-4.437	3.48
103-90-2	4-acetamidophenol (4-hydroxyacetanilide);paracetamol;acetaminophen;acetaminophen [paracetamol];n-(4-hydroxy-phenyl)-acetamide;acetamide, n-(4-hydroxyphenyl);acetamide, n-(4-hydroxyphenyl)-;n-(4-hydroxyphenyl)acetamide;acetanilide, 4'-hydroxy-;4-acetamidophenol;4-hydroxyacetanilide;apap;4-acetamidophenol (4-hydroxyacetanilide) paracetamol acetaminophen acetaminophen [paracetamol] n-(4-hydroxy-phen…	YES (Toxicity Score of 10 confirmed)	NO	6	NO	NO	8	TRUE	10	10	Low		TRUE	248	74	YES	YES	TRUE	TRUE	70	70		OTH-YES	CARC-MUTA-STOT RE		x	x	x	10	10	10	10	10	10	10	10	10	10	10	10		CC(=O)Nc1ccc(O)cc1	C8H9NO2	151.16	0.46	11.041	-10.581	0.0108
2536-05-2	benzene, 1,1’-methylenebis[2-isocyanato-;2,2'-methylenediphenyl diisocyanate;1,1'-methanediylbis(2-isocyanatobenzene);benzene, 1,1'-methylenebis[2-isocyanato-;benzene, 1,1'-methylenebis 2-isocyanato-;isocyanic acid, methylenedi-o-phenylene ester;benzene, 1,1'-methylenebisХ2-isocyanato-;benzene, 1,1'-methylenebis(2-isocyanato-;1,1'-methylenebis(2-isocyanatobenzene);2,2'-diphenylmethane diisocyanat…	YES (Step 1)	NO	4.5	NO	NO	10	TRUE	10	10	High		TRUE	245	72.5	YES	YES	TRUE	TRUE	71	71		JOINT	CARC-STOT RE			x		6	6	6	6	6	6	6	6	6	6	10	6		O=C=Nc1ccccc1Cc1ccccc1N=C=O	C15H10N2O2	250.24	5.22	9.657	-4.437	3.48
101-14-4	2-chloroaniline;3,3'-dichloro-4,4'-diaminodiphenylmethane;4,4'-methylenebis(2-chloroaniline);benzenamine, 4,4'-methylenebis[2-chloro-;4,4'-methylene-bis(2-chloroaniline);4,4'-methylenebis(2-chlorobenzenamine);benzenamine, 4,4-methylenebis[2-chloro-;benzenamine, 4,4’-methylenebis[2-chloro-;4,4'-methylenebis[2-chloroaniline];benzenamine, 4,4'-methylenebis 2-chloro-;aniline, 4,4'-methylenebisХ2-chlo…	YES (Step 1)	NO	4.5	NO	NO	10	TRUE	10	10	High		TRUE	245	72.5	YES	YES	TRUE	TRUE	71	71		HARMON	CARC		x	x	x	10	10	10	10	10	10	10	10	10	10	10	10		Nc1ccc(Cc2ccc(N)c(Cl)c2)cc1Cl	C13H12Cl2N2	267.14	3.91	12	-8.09	0.552
121-82-4	hexahydro-1,3,5-trinitro-1,3,5-triazine (rdx);hexahydro-1,3,5-trinitro-1,3,5-triazine;1,3,5-triazine, hexahydro-1,3,5-trinitro- (rdx);1,3,5,-trinitrohexahydro-1,3,5-triazine;1,3,5-triazine, hexahydro-1,3,5-trinitro-;perhydro-1,3,5-trinitro-1,3,5-triazine;rdx;1,3,5-trinitro-1,3,5-triazinane;hexahydro-1,3,5-trinitro-1,2,3-triazine;s-triazine, hexahydro-1,3,5-trinitro-;cyclonite;1,3,5-trinitro-1,3,5…	YES (Step 1)	YES	4.5	NO	NO	10	TRUE	10	10	High		TRUE	245	72.5	YES	YES	TRUE	TRUE	71	71		JOINT	STOT RE		x	x	x	10	10	10	10	10	10	10	10	10	10	10	10		O=N(=O)N1CN(N(=O)=O)CN(N(=O)=O)C1	C3H6N6O6	222.11	0.87	9.955	-9.085	0.0282
482-89-3	2-(3-oxo-1,3-dihydro-2h-indol-2-ylidene)-1,2-dihydro-3h-indol-3-one	Excluded - impurity	NO	4.5	NO	NO	10	TRUE	10	10	Low (affected by impurity)		TRUE	245	72.5	YES	YES	TRUE	TRUE	71	71		JOINT	STOT RE		x	x	x	10	10	10	10	10	10	10	10	10	10	10	10		OC1=C(C2C(=O)c3ccccc3N=2)Nc2ccccc12	C16H10N2O2	262.25	2.53	12	-9.47	0.345
68610-51-5	phenol, 4-methyl-, reaction products with dicyclopentadiene and isobutylene;phenol, 4-methyl-, reaction products with dicyclopentadieneand isobutylene;4-methylphenol reaction products with dicyclopentadiene and isobutylene;butylated reaction product of p-cresol and dicyclopentadiene;p-cresol, dicyclopentadiene, isobutylene reaction products;polymeric hindered phenol;santowhite ml;vulkanox skf;win…	Excluded (structure not representative)	NO	4.5	NO	NO	10	TRUE	10	10	High		TRUE	245	72.5	YES	YES	TRUE	TRUE	71	71		JOINT	REPR		x	x		10	10	6	6	6	6	10	10	6	10	6	10		Cc1cc(C2CC3CC2C2C3C3CC2C2C3CC3C2C2CC3C=C2)c(O)c(C(C)(C)C)c1	C31H40O	428.63	10.36	12	-1.64	11400
80-51-3	benzenesulfonic acid, 4,4'-oxybis-, 1,1'-dihydrazide;4,4'-oxybis(benzenesulfonylhydrazide);benzenesulfonic acid, 4,4’-oxybis-, dihydrazide;4,4'-oxydi(benzenesulphonohydrazide);benzenesulfonic acid, 4,4'-oxybis-, dihydrazide;4,4'-oxydibenzenesulfonohydrazide;benzenesulfonic acid, 4,4'-oxydi-, dihydrazide;p,p'-oxybis(benzenesulfonyl hydrazide);benzenesulfonic acid, 4,4'-oxybis-, 1,1'-dihydrazide 4,…	YES (Step 1)	NO	4.5	NO	NO	10	TRUE	10	10	High		TRUE	245	72.5	YES	YES	TRUE	TRUE	71	71		JOINT	MUTA		x	x	x	10	10	10	10	10	10	10	10	10	10	10	10		NNS(=O)(=O)c1ccc(Oc2ccc(S(=O)(=O)NN)cc2)cc1	C12H14N4O5S2	358.38	0.08	12	-11.92	0.0594
115-27-5	chlorendic anhydride;4,7-methanoisobenzofuran-1,3-dione, 4,5,6,7,8,8-hexachloro-3a,4,7,7a-tetrahydro-;1,4,5,6,7,7-hexachloro-8,9,10-trinorborn-5-ene-2,3-dicarboxylic anhydride;4,5,6,7,8,8-hexachloro-3a,4,7,7a-tetrahydro-4,7-methano-2-benzofuran-1,3-dione;5-norbornene-2,3-dicarboxylic anhydride, 1,4,5,6,7,7-hexachloro-;chlorendic anhydride 4,7-methanoisobenzofuran-1,3-dione, 4,5,6,7,8,8-hexachloro…	Excluded - impurity	NO	3.75	NO	NO	10	TRUE	10	10	Low (affected by impurity)		TRUE	237.5	68.75	YES	YES	TRUE	TRUE	77	77		JOINT	CARC-STOT RE		x	x	x	10	10	10	10	10	10	10	10	10	10	10	10		O=C1C2C(C(=O)O1)C1(Cl)C(Cl)=C(Cl)C2(Cl)C1(Cl)Cl	C9H2Cl6O3	370.82	4.37	9.812	-5.442	6.25
133-14-2	peroxide, bis(2,4-dichlorobenzoyl);bis(2,4-dichlorobenzoyl) peroxide;bis(2,4-dichlorophenyl)peroxyanhydride;peroxide, bis(2,4-dichlorobenzoyl) bis(2,4-dichlorobenzoyl) peroxide bis(2,4-dichlorophenyl)peroxyanhydride	YES (Step 1)	NO	3.75	NO	NO	10	TRUE	10	10	High		TRUE	237.5	68.75	YES	YES	TRUE	TRUE	77	77		JOINT	REPR		x	x	x	10	10	10	10	10	10	10	10	10	10	10	10		O=C(c1ccc(Cl)cc1Cl)OOC(=O)c1ccc(Cl)cc1Cl	C14H6Cl4O4	380	6.01	10.369	-4.359	38.9
13811-50-2	1,3-divinylimidazolidin-2-one;1,3-diethenylimidazolidin-2-one;1,3-divinylimidazolidin-2-one 1,3-diethenylimidazolidin-2-one	YES (Step 1)	NO	10	YES	NO	10	TRUE	6	10	High		TRUE	236	68	YES	YES	TRUE	TRUE	79	79		JOINT	REPR-STOT RE					3	3	3	3	6	3	3	3	6	3	6	3		C=CN1CCN(C=C)C1=O	C7H10N2O	138.16	0.4	6.728	-6.328	0.00577
64742-90-1	residues (petroleum), steam-cracked;residues, petroleum, steam-cracked;residues, petroleum, steam cracked;residues(petroleum),steamcracked;residues (petroleum), steam-cracked residues, petroleum, steam-cracked residues, petroleum, steam cracked residues(petroleum),steamcracked	Excluded (petroleum product)	NO	10	NO	NO	10	TRUE	6	10	High		TRUE	236	68	YES	YES	TRUE	TRUE	79	79		HARMON	CARC					6	6	6	6	6	6	6	6	6	6	6	6		c1cccc2ccc3c4ccccc4ccc3c12	C18H12	228.27	5.81	9.48	-3.67	3.14
7226-23-5	dimethylpropyleneurea;tetrahydro-1,3-dimethyl-1h-pyrimidin-2-one;1,3-dimethyltetrahydropyrimidin-2(1h)-one;2(1h)-pyrimidinone, tetrahydro-1,3-dimethyl-;1,3-dimethyl-tetrahydro-pyrimidin-2-one ;1,3-dimethyl-tetrahydro-pyrimidin-2-one ;1,3-dimethyl-2-oxohexahydropyrimidine;1,3-dimethyl-3,4,5,6-tetrahydro-2(1h)-pyrimidinone;1,3-dimethyl-3,4,5,6-tetrahydro-2(1h)-pyrimidone;1,3-dimethyl-3,4,5,6-tetrah…	YES (Step 1)	NO	10	YES	NO	10	TRUE	6	10	High		TRUE	236	68	YES	YES	TRUE	TRUE	79	79		HARMON	REPR					3	3	6	6	6	3	3	3	6	3	6	3		CN1CCCN(C)C1=O	C6H12N2O	128.17	0.18	6.873	-6.693	0.00516
74869-22-0	lubricating oils;lubricatingoils,ifthey contain>3%w/w dmsoextract;lubricating oils lubricatingoils,ifthey contain>3%w/w dmsoextract	Excluded (petroleum product)	NO	10	NO	NO	10	TRUE	6	10	High		TRUE	236	68	YES	YES	TRUE	TRUE	79	79		HARMON	CARC					3	1	3	3	3	3	6	6	1	6	1	3		CCC(C)CCCC(C)CCCC(C)CCCC(C)C	C20H42	282.53	9.87	6.303	3.567	52.4
2386-87-0	7-oxabicyclo[4.1.0]heptane-3-carboxylic;ut-632;7-oxabicyclo[4.1.0]heptane-3-carboxylic acid, 7-oxabicyclo[4.1.0]hept-3-ylmethyl ester;7-oxabicyclo[4.1.0]hept-3-ylmethyl 7-oxabicyclo[4.1.0]heptane-3-carboxylate;7-oxabicyclo 4.1.0 heptane-3-carboxylic acid, 7-oxabicyclo 4.1.0 hept-3-ylmethyl ester;7-oxabicycloХ4.1.0еheptane-3-carboxylic acid, 7-oxabicycloХ4.1.0еhept-3-ylmethyl ester;3,4-epoxycycloh…	YES (Toxicity Score of 10 confirmed)	NO	4.5	NO	NO	8	TRUE	10	10	High (Muta Cat. 2 proposed in Substance evaluation)		TRUE	236	68	YES	YES	TRUE	TRUE	79	79		OTH-YES	MUTA-STOT RE		x	x	x	6	10	10	10	10	10	10	10	10	10	10	10		O=C(C1CCC2C(C1)O2)OCC1CCC2C(C1)O2	C14H20O4	252.29	2.37	9.193	-6.823	0.513
84-61-7	dicyclohexyl phthalate;1,2-benzenedicarboxylic acid, 1,2-dicyclohexyl ester;1,2-benzenedicarboxylic acid, dicyclohexyl ester;dicyclohexyl benzene-1,2-dicarboxylate;phthalic acid, dicyclohexyl ester;dicyclohexyl phthalate (1,2-benzenedicarboxylic acid, dicyclohexyl ester);dicyclohexyl phthalate 1,2-benzenedicarboxylic acid, 1,2-dicyclohexyl ester 1,2-benzenedicarboxylic acid, dicyclohexyl ester di…	YES (Step 1)	NO	6	NO	NO	6	TRUE	10	10	High		TRUE	236	68	YES	YES	TRUE	TRUE	79	79		HARMON	REPR		x	x	x	10	10	10	10	10	10	6	6	10	6	10	6		O=C(c1ccccc1C(=O)OC1CCCCC1)OC1CCCCC1	C20H26O4	330.4	6.2	11.588	-5.388	0.423
119462-56-5	1h-pyrolle-2,5-dione, 1,1'-[1,3-phenylenebis(methylene)]bis[3-methyl-;1h-pyrrole-2,5-dione, 1,1'-[1,3-phenylenebis(methylene)]bis[3-methyl-;1,3-bis(3-methyl-2,5-dioxo-1h-pyrrolinylmethyl)benzene;1,1'-[1,3-phenylenebis(methylene)]bis[3-methyl-1h-pyrrole-2,5-dione];1,3-bis(citraconimidomethyl)benzene;1,3-bis(citraconimidomethylene)benzene;n,n'-(m-xylylene)biscitraconimide;n,n'-bis(citraconimido)-m-…	YES (Step 1)	NO	3.5	NO	NO	10	TRUE	10	10	High		TRUE	235	67.5	YES	YES	TRUE	TRUE	85	85		HARMON	STOT RE		x	x	x	10	10	10	10	10	10	10	10	10	10	10	10		CC1=CC(=O)N(Cc2cccc(CN3C(=O)C=C(C)C3=O)c2)C1=O	C18H16N2O4	324.32	2.69	12	-9.31	0.129
13674-87-8	tris (1,3-dichloro-2-propyl) phosphate;tris(1,3-dichloroisopropyl) phosphate;2-propanol, 1,3-dichloro-, phosphate (3:1);tris(1,3-dichloro-2-propyl)phosphate;tris-(1,3-dichloro-2-propyl)phosphate;tris[2-chloro-1-(chloromethyl)ethyl] phosphate;tris(1,3-dichloropropan-2-yl) phosphate;1,3-dichloro-2-propanol phosphate (3:1);tdcpp;tris(2-chloro-1-(chloromethyl)ethyl) phosphate;tris (1,3-dichloro-2-pro…	YES (Step 1)	YES	3.5	NO	NO	10	TRUE	10	10	High		TRUE	235	67.5	YES	YES	TRUE	TRUE	85	85		HARMON	CARC		x	x	x	10	10	10	10	10	10	10	10	10	10	10	10		O=P(OC(CCl)CCl)(OC(CCl)CCl)OC(CCl)CCl	C9H15Cl6O4P	430.9	3.65	10.622	-6.972	0.41
149850-30-6	methyl n-[3-acetylamino)-4-(2-cyano-4-nitrophenylazo)phenyl]-n-[(1-methoxy)acetyl]glycinate;methyl n-[3-(acetylamino)-4-(2-cyano-4-nitrophenylazo)phenyl]-n-(2-methoxy-2-oxoethyl)glycinate;methyl n-[3-acetylamino)-4-(2-cyano-4-nitrophenylazo)phenyl]-n-[(1-methoxy)acetyl]glycinate methyl n-[3-(acetylamino)-4-(2-cyano-4-nitrophenylazo)phenyl]-n-(2-methoxy-2-oxoethyl)glycinate	YES (Step 1)	NO	3.5	NO	NO	10	TRUE	10	10	High		TRUE	235	67.5	YES	YES	TRUE	TRUE	85	85		JOINT	STOT RE		x	x	x	10	10	10	10	10	10	10	10	10	3	10	6		CC(=O)Nc1cc(N(CC(=O)OC)CC(=O)OC)ccc1N=Nc1ccc(N(=O)=O)cc1C#N	C21H20N6O7	468.4	2.82	12	-9.18	0.000772
2162-74-5	benzenamine, n,n’-methanetetraylbis[2,6-bis(1-methylethyl)-;bis(2,6-diisopropylphenyl)carbodiimide;n,n'-bis[2,6-di(propan-2-yl)phenyl]carbodiimide;benzenamine, n,n'-methanetetraylbis[2,6-bis(1-methylethyl)-;benzenamine, n,n'-methanetetraylbis 2,6-bis(1-methylethyl)-;carbodiimide, bis(2,6-diisopropylphenyl)-;benzenamine, n,n'-methanetetraylbisХ2,6-bis(1-methylethyl)-;n,n'-bis(2,6-diisopropylphenyl…	YES (Step 1)	NO	3.5	NO	NO	10	TRUE	10	10	High		TRUE	235	67.5	YES	YES	TRUE	TRUE	85	85		JOINT	REPR-STOT RE		x	x	x	10	10	6	10	10	10	10	10	6	10	6	10		CC(C)c1cccc(C(C)C)c1N=C=Nc1c(C(C)C)cccc1C(C)C	C25H34N2	362.53	8.72	10.648	-1.928	59.9
2226-96-2	4-hydroxy-2,2,6,6-tetramethylpiperidine-1-oxyl;4-hydroxy-2,2,6,6-tetramethylpiperidinoxyl;2,2,6,6-tetramethylpiperidine-1,4-diol;1-piperidinyloxy, 4-hydroxy-2,2,6,6-tetramethyl-;piperidinooxy, 4-hydroxy-2,2,6,6-tetramethyl-;1-λ1-oxidanyl-2,2,6,6-tetramethylpiperidin-4-ol;4-hydroxy-tempo;4-hydroxy-2,2,6,6-tetramethylpiperidine-n-oxyl;4-hydroxy-2,2,6,6-tetramethyl-1-piperidinyloxy;1-oxyl-2,2,6,6-te…	YES (Step 1)	NO	3.5	NO	NO	10	TRUE	10	10	High		TRUE	235	67.5	YES	YES	TRUE	TRUE	85	85		JOINT	STOT RE		x	x	x	10	10	10	10	10	10	10	10	10	10	10	10		CC1(C)CC(O)CC(C)(C)N1O	C9H19NO2	173.25	0.56	10.357	-9.797	0.0523
2451-62-9	tris(2,3-epoxypropyl)isocyanurate;1,3,5-triazine-2,4,6(1h,3h,5h)-trione, 1,3,5-tris(2-oxiranylmethyl)-;1,3,5-triazine-2,4,6(1h,3h,5h)-trione, 1,3,5-tris(oxiranylmethyl)-;1,3,5-tris(oxiranylmethyl)-1,3,5-triazine-2,4,6(1h,3h,5h)-trione;1,3,5-tris(oxiran-2-ylmethyl)-1,3,5-triazinane-2,4,6-trione;1,3,5tris(oxiranylmethyl)1,3,5triazine2,4,6(1h,3h,5h)trione(tgic);s-triazine-2,4,6(1h,3h,5h)-trione, 1,3…	YES (Step 1)	NO	3.5	NO	NO	10	TRUE	10	10	High		TRUE	235	67.5	YES	YES	TRUE	TRUE	85	85		HARMON	MUTA-STOT RE			x	x	6	6	10	10	10	10	6	6	10	1	10	3		O=C1N(CC2CO2)C(=O)N(CC2CO2)C(=O)N1CC1CO1	C12H15N3O6	297.25	1.21	12	-10.79	4.56e-06
25973-55-1	phenol, 2-(2h-benzotriazol-2-yl)-4,6-bis(1,1-dimethylpropyl)-;2-(2h-benzotriazol-2-yl)-4,6-ditertpentylphenol;2-(2h-benzotriazol-2-yl)-4,6-bis(2-methylbutan-2-yl)phenol;2-(2h-benzotriazol-2-yl)-4,6-bis(1,1-dimethylpropyl)phenol;phenol, 2-(2h-benzotriazol-2-yl)-4,6-bis(1,1-dimethylpropyl)- 2-(2h-benzotriazol-2-yl)-4,6-ditertpentylphenol 2-(2h-benzotriazol-2-yl)-4,6-bis(2-methylbutan-2-yl)phenol 2-…	YES (Step 1)	NO	3.5	NO	NO	10	TRUE	10	10	High		TRUE	235	67.5	YES	YES	TRUE	TRUE	85	85		JOINT	STOT RE		x	x	x	10	10	10	10	10	10	10	10	10	10	10	10		CCC(C)(C)c1cc(C(C)(C)CC)cc(N2Nc3ccccc3N2)c1O	C22H31N3O	353.48	6.79	12	-5.21	45.2
28768-32-3	2-oxiranemethanamine, n,n'-(methylenedi-4,1-phenylene)bis[n-(2-oxiranylmethyl)-;oxiranemethanamine, n,n’-(methylenedi-4,1-phenylene)bis[n-(oxiranylmethyl)-;4,4'-methylenebis[n,n-bis(2,3-epoxypropyl)aniline];4,4'-methanediylbis[n,n-bis(oxiran-2-ylmethyl)aniline];oxiranemethanamine, n,n'-(methylenedi-4,1-phenylene)bis[n-(oxiranylmethyl)-;oxiranemethanamine, n,n'-(methylenedi-4,1-phenylene)bis n-(ox…	YES (Toxicity Score of 10 confirmed)	NO	3.5	NO	NO	10	TRUE	10	10	Low		TRUE	235	67.5	YES	YES	TRUE	TRUE	85	85		OTH-YES	MUTA		x	x	x	10	10	10	10	10	10	10	10	10	10	10	10		C1C(CN(CC2CO2)c2ccc(Cc3ccc(N(CC4CO4)CC4CO4)cc3)cc2)O1	C25H30N2O4	422.5	2.53	12	-9.47	0.0156
30499-70-8	1,3-propanediol, 2-ethyl-2-(hydroxymethyl)-, polymer with (chloromethyl)oxirane;1,3-propanediol, 2-ethyl-2-(hydroxymethyl)-, polymer with 2-(chloromethyl)oxirane;reaction mass of 1-(2,3-epoxypropoxy)-2,2-bis ((2,3-epoxypropoxy)methyl) butane and 1-(2,3-epoxypropoxy)-2-((2,3-epoxypropoxy)methyl)-2-hydroxymethyl butane;1,3-propanediol, 2-ethyl-2-(hydroxymethyl)-, polymer with (chloromethyl)oxirane …	YES (Step 1)	NO	3.5	NO	NO	10	TRUE	10	10	High		TRUE	235	67.5	YES	YES	TRUE	TRUE	85	85		JOINT	REPR		x	x	x	10	10	10	10	10	10	10	10	10	10	10	10		CCC(COCC1CO1)(COCC1CO1)COCC1CO1	C15H26O6	302.35	-0.5	11.194	-11.694	0.00851
474510-57-1	1-propanone, 1,1'-(methylene-di-4,1-phenylene)bis[2-hydroxy-2-methyl-;2-hydroxy-1-(4-(4-(2-hydroxy-2-methylpropionyl) benzyl) phenyl)-2-methylpropan-1-one;1-propanone, 1,1'-(methylene-di-4,1-phenylene)bis[2-hydroxy-2-methyl- 2-hydroxy-1-(4-(4-(2-hydroxy-2-methylpropionyl) benzyl) phenyl)-2-methylpropan-1-one	YES (Step 1)	NO	3.5	NO	NO	10	TRUE	10	10	High		TRUE	235	67.5	YES	YES	TRUE	TRUE	85	85		HARMON	STOT RE			x		6	6	6	6	6	6	6	6	6	6	10	6		CC(C)(O)C(=O)c1ccc(Cc2ccc(C(=O)C(C)(C)O)cc2)cc1	C21H24O4	340.4	2.6	7.909	-5.309	0.338
495-54-5	2,4-diaminoazobenzene;4-phenylazo-benzene-1,3-diamine;1,3-benzenediamine, 4-(phenylazo)-;4-(phenylazo)benzene-1,3-diamine;4-(phenyldiazenyl)benzene-1,3-diamine;mphenylenediamine,4(phenylazo),andits salts,whenusedasasubstanceinhair dye products;chrysoidine free base;4-(phenylazo)-m-phenylenediamine	YES (Step 1)	NO	3.5	NO	NO	10	TRUE	10	10	High		TRUE	235	67.5	YES	YES	TRUE	TRUE	85	85		HARMON	MUTA		x	x	x	10	10	10	10	10	10	10	10	10	10	10	10		Nc1ccc(N=Nc2ccccc2)c(N)c1	C12H12N4	212.24	2.13	12	-9.87	0.0464
548-62-9	crystal violet (basic violet 3)	YES (Step 1)	NO	3.5	NO	NO	10	TRUE	10	10	High		TRUE	235	67.5	YES	YES	TRUE	TRUE	85	85		HARMON	CARC		x	x	x	10	10	10	10	10	10	10	10	10	10	10	10		CN(C)c1ccc(C(=C2C=CC(=N(C)(C)Cl)C=C2)c2ccc(N(C)C)cc2)cc1	C25H30ClN3	407.96	0.51	12	-11.49	0.141
69563-51-5	benzenesulfonamide, n-(4-amino-9,10-dihydro-3-methoxy-9,10-dioxo-1-anthracenyl)-;n-(4-amino-9,10-dihydro-3-methoxy-9,10-dioxo-1-anthryl)benzenesulphonamide;n-(4-amino-3-methoxy-9,10-dioxo-9,10-dihydroanthracen-1-yl)benzenesulfonamide;benzenesulfonamide, n-(4-amino-3-methoxy-1-anthraquinonyl)-;benzenesulfonamide, n-(4-amino-9,10-dihydro-3- methoxy-9,10-dioxo-1-anthracenyl)-;benzenesulfonamide, n-(…	YES (Step 1)	NO	3.5	NO	NO	10	TRUE	10	10	High		TRUE	235	67.5	YES	YES	TRUE	TRUE	85	85		JOINT	STOT RE		x	x	x	10	10	10	10	10	10	10	10	10	6	10	6		COc1cc(NS(=O)(=O)c2ccccc2)c2c(c1N)C(=O)c1ccccc1C2=O	C21H16N2O5S	408.41	4.25	12	-7.75	0.0531
75980-60-8	phosphine oxide, diphenyl(2,4,6-trimethylbenzoyl)-;diphenyl(2,4,6-trimethylbenzoyl)phosphine oxide;(diphenylphosphoryl)(2,4,6-trimethylphenyl)methanone;(diphenylphosphinyl)-(2,4,6-trimethylphenyl)methanone;chivacure tpo;darocur tpo;darocure tpo;genocure tpo;irgacure tpo;l-tpo;lucirin 8893x;lucirin lr 8953;lucirin tpo solid;lucirin tpo-x;photocure tpo;speedcure tpo;tpo-x;phosphine oxide, diphenyl(…	YES (Step 1)	NO	3.5	NO	NO	10	TRUE	10	10	High		TRUE	235	67.5	YES	YES	TRUE	TRUE	85	85		HARMON	REPR		x	x	x	10	10	10	10	10	10	10	10	10	10	10	10		Cc1cc(C)cc(C)c1C(=O)P(=O)(c1ccccc1)c1ccccc1	C22H21O2P	348.36	3.87	12	-8.13	0.549
80-08-0	dapsone;4,4'-sulfonylbisbenzenamine;di(p-aminophenyl)sulfone;benzenamine, 4,4’-sulfonylbis-;4,4'-sulfonyldianiline;benzenamine, 4,4'-sulfonylbis-;aniline, 4,4'-sulfonyldi-; 4,4'-sulfonylbisbenzenamine ;dapsone (4,4'-sulfonyldianiline);dapsone 4,4'-sulfonylbisbenzenamine di(p-aminophenyl)sulfone benzenamine, 4,4’-sulfonylbis- 4,4'-sulfonyldianiline benzenamine, 4,4'-sulfonylbis- aniline, 4,4'-sulf…	YES (Step 1)	NO	3.5	NO	NO	10	TRUE	10	10	High		TRUE	235	67.5	YES	YES	TRUE	TRUE	85	85		JOINT	STOT RE		x	x	x	10	10	10	10	10	10	10	10	10	10	10	10		Nc1ccc(S(=O)(=O)c2ccc(N)cc2)cc1	C12H12N2O2S	248.29	0.97	12	-11.03	0.0664
81-68-5	benzenesulfonamide, n-(4-amino-9,10-dihydro-3-methoxy-9,10-dioxo-1-anthracenyl)-4-methyl-;n-(4-amino-9,10-dihydro-3-methoxy-9,10-dioxo-1-anthryl)-4-methylbenzenesulphonamide;n-(4-amino-3-methoxy-9,10-dioxo-9,10-dihydroanthracen-1-yl)-4-methylbenzenesulfonamide;p-toluenesulfonamide, n-(4-amino-3-methoxy-1-anthraquinonyl)-;benzenesulfonamide, n-(4-amino-9,10-dihydro-3-methoxy-9,10-dioxo-1-anthracen…	YES (Step 1)	NO	3.5	NO	NO	10	TRUE	10	10	High		TRUE	235	67.5	YES	YES	TRUE	TRUE	85	85		JOINT	STOT RE		x	x	x	10	10	10	10	10	10	10	10	10	6	10	6		Cc1ccc(S(=O)(=O)Nc2cc(OC)c(N)c3c2C(=O)c2ccccc2C3=O)cc1	C22H18N2O5S	422.44	4.79	12	-7.21	0.193
90-41-5	2-aminobiphenyl (2-phenylaniline);o-aminobiphenyl;[1,1'-biphenyl]-2-amine;2-aminobiphenyl;2-biphenylamine hydrochloride;biphenyl-2-ylamine;2-biphenylamine;biphenyl-2-amine;biphenyl2ylamine;1,1'-biphenyl -2-amine;Х1,1'-biphenylе-2-amine;(1,1'-biphenyl)-2-amine;?1,1'-biphenyl?-2-amine;o1,1'-biphenyla-2-amine	YES (Step 1)	NO	3.5	NO	NO	10	TRUE	10	10	High		TRUE	235	67.5	YES	YES	TRUE	TRUE	85	85		HARMON	CARC			x		6	6	6	6	6	6	6	6	10	6	10	6		Nc1ccccc1-c1ccccc1	C12H11N	169.21	2.84	8.064	-5.224	0.75
101-77-9	4,4'-diaminodiphenylmethane;di-(p-aminophenyl)methane;benzenamine, 4,4'-methylenebis-;4,4'-methylenebis(aniline);4,4'-methylenedianiline dihydrochloride;4,4'-methylenedianiline;benzenamine, 4,4 -methylenebis-;methylene dianiline;4,4’-methylenedianiline;benzenamine, 4,4’-methylenebis-;4,4?methylenedianiline;aniline, 4,4'-methylenedi-;4,4'-methylene dianaline;4,4´-methylenedianiline;4,4'-methylened…	YES (Step 1)	NO	3.3	NO	NO	10	TRUE	10	10	High		TRUE	233	66.5	YES	YES	TRUE	TRUE	102	102		HARMON	CARC-MUTA-STOT RE		x	x	x	10	10	10	10	10	10	10	10	10	10	10	10		Nc1ccc(Cc2ccc(N)cc2)cc1	C13H14N2	198.25	1.59	10.201	-8.611	0.096
20120-33-6	phosphonic acid, [3-[(hydroxymethyl)amino]-3-oxopropyl]-, dimethyl ester;dimethyl [3-[(hydroxymethyl)amino]-3-oxopropyl]phosphonate;dimethyl {3-[(hydroxymethyl)amino]-3-oxopropyl}phosphonate;[3-[(hydroxymethyl)amino]-3-oxopropyl]phosphonic acid, dimethyl ester;phosphonic acid, 3- (hydroxymethyl)amino -3-oxopropyl -, dimethyl ester;phosphonic acid, (2-((hydroxymethyl)carbamoyl)ethyl)-, dimethyl es…	Excluded - impurity	NO	3.5	NO	NO	8	TRUE	10	10	Low (affected by impurity)		TRUE	228	64	YES	YES	TRUE	TRUE	103	103		JOINT	CARC		x	x	x	10	10	10	10	10	10	10	10	10	10	10	10		COP(=O)(CCC(=O)NCO)OC	C6H14NO5P	211.15	-2	10.693	-12.693	0.000756
606-28-0	2-benzoyl benzoic acid methyl ester;benzoic acid, 2-benzoyl-, methyl ester;methyl 2-benzoylbenzoate;methyl 2-(phenylcarbonyl)benzoate;benzoic acid, o-benzoyl-, methyl ester;2-benzoyl benzoic acid methyl ester benzoic acid, 2-benzoyl-, methyl ester methyl 2-benzoylbenzoate methyl 2-(phenylcarbonyl)benzoate benzoic acid, o-benzoyl-, methyl ester	YES (Step 1)	NO	3.5	NO	NO	8	TRUE	10	10	High		TRUE	228	64	YES	YES	TRUE	TRUE	103	103		JOINT	STOT RE			x		6	6	6	6	6	6	6	6	10	6	10	6		COC(=O)c1ccccc1C(=O)c1ccccc1	C15H12O3	240.24	2.7	8.992	-6.292	0.0832
133-06-2	captan;1h-isoindole-1,3(2h)-dione, 3a,4,7,7a-tetrahydro-2-[(trichloromethyl)thio]-;captan 90-concentrate (solid);2-[(trichloromethyl)sulfanyl]-3a,4,7,7a-tetrahydro-1h-isoindole-1,3(2h)-dione;n(trichloromethylthio)4cyclohexene1,2dicarboximide(captaniso);3a,4,7,7a-tetrahydro-2-[(trichloromethyl)thio]-1h-isoindole-1,3-(2h)-dione;merpan;1h-isoindole-1,3(2h)-dione, 3a,4,7,7a-tetrahydro-2-((trichlorome…	YES (Step 1)	NO	2.75	NO	NO	10	TRUE	10	10	High		TRUE	227.5	63.75	YES	YES	TRUE	TRUE	105	105		HARMON	CARC		x	x	x	6	10	10	10	10	10	10	10	10	10	10	10		O=C1C2CC=CCC2C(=O)N1SC(Cl)(Cl)Cl	C9H8Cl3NO2S	300.58	2.8	9.343	-6.543	2.51
13676-54-5	bismaleimide;1h-pyrrole-2,5-dione, 1,1'-(methylenedi-4,1-phenylene)bis-;1h-pyrrole-2,5-dione, 1,1’-(methylenedi-4,1-phenylene)bis-;1,1'-(methylenedi-p-phenylene)bismaleimide;1,1'-(methanediyldibenzene-4,1-diyl)bis(1h-pyrrole-2,5-dione);maleimide, n,n'-(methylenedi-p-phenylene)di-;1,1'-(methylenedi-4,1-phenylene)bis(1h-pyrrole-2,5-dione);bismaleimide 1h-pyrrole-2,5-dione, 1,1'-(methylenedi-4,1-phe…	YES (Step 1)	NO	2.75	NO	NO	10	TRUE	10	10	High		TRUE	227.5	63.75	YES	YES	TRUE	TRUE	105	105		JOINT	MUTA		x	x	x	10	10	10	10	10	10	10	10	10	10	10	10		O=C1C=CC(=O)N1c1ccc(Cc2ccc(N3C(=O)C=CC3=O)cc2)cc1	C21H14N2O4	358.33	1.8	12	-10.2	0.407
13752-51-7	n-oxydiethylene thiocarbamyl- n-oxydiethylene sulfenamide;n-oxydiethylene thiocarbamyl-n'-oxydiethylene sulfenamide;morpholine, 4-[(4-morpholinylthio)thioxomethyl]-;4-[(morpholinothio)thioxomethyl]morpholine;4-[(morpholin-4-ylcarbonothioyl)sulfanyl]morpholine;morpholine, 4- (4-morpholinylthio)thioxomethyl -;morpholine, 4-Х(morpholinothiocarbonyl)thioе-;morpholine, 4-Х(4-morpholinylthio)thioxometh…	YES (Step 1)	NO	2.75	NO	NO	10	TRUE	10	10	High		TRUE	227.5	63.75	YES	YES	TRUE	TRUE	105	105		JOINT	CARC			x	x	6	6	10	10	10	6	6	6	10	6	10	10		S=C(N1CCOCC1)SN1CCOCC1	C9H16N2O2S2	248.36	-0.84	6.946	-7.786	0.0196
5026-74-4	oxiranemethanamine, n-[4-(oxiranylmethoxy)phenyl]-n-(oxiranylmethyl)-;p-(2,3-epoxypropoxy)-n,n-bis(2,3-epoxypropyl)aniline;4-(oxiran-2-ylmethoxy)-n,n-bis(oxiran-2-ylmethyl)aniline;oxiranemethanamine, n- 4-(oxiranylmethoxy)phenyl -n-(oxiranylmethyl)-;aniline, p-(2,3-epoxypropoxy)-n,n-bis(2,3-epoxypropyl)-;oxiranemethanamine, n-Х4-(oxiranylmethoxy)phenylе-n-(oxiranylmethyl)-;oxiranemethanamine, n-[…	YES (Step 1)	NO	2.75	NO	NO	10	TRUE	10	10	High		TRUE	227.5	63.75	YES	YES	TRUE	TRUE	105	105		JOINT	MUTA-STOT RE		x	x	x	10	10	10	10	10	10	10	10	10	10	10	10		C1C(CN(CC2CO2)c2ccc(OCC3CO3)cc2)O1	C15H19NO4	277.3	0.87	11.547	-10.677	0.0144
599-61-1	benzenamine, 3,3'-sulfonylbis-;3,3'-sulphonyldianiline;3,3'-sulfonyldianiline;aniline, 3,3'-sulfonyldi-;benzenamine, 3,3'-sulfonylbis- 3,3'-sulphonyldianiline 3,3'-sulfonyldianiline aniline, 3,3'-sulfonyldi-	YES (Step 1)	NO	2.75	NO	NO	10	TRUE	10	10	High		TRUE	227.5	63.75	YES	YES	TRUE	TRUE	105	105		JOINT	STOT RE		x	x	x	10	10	10	10	10	10	10	10	10	10	10	10		Nc1cccc(S(=O)(=O)c2cccc(N)c2)c1	C12H12N2O2S	248.29	0.77	12	-11.23	0.0577
68479-98-1	benzenediamine, ar,ar-diethyl-ar-methyl-;diethylmethylbenzenediamine;3-(pentan-3-yl)benzene-1,2-diamine;benzenediamine, ar,ar-diethyl-ar-methyl- diethylmethylbenzenediamine 3-(pentan-3-yl)benzene-1,2-diamine	YES (Step 1)	YES	2.75	NO	NO	10	TRUE	10	10	High		TRUE	227.5	63.75	YES	YES	TRUE	TRUE	105	105		HARMON	STOT RE		x	x	x	6	10	10	10	10	10	6	6	10	6	10	6		CCC(CC)c1cccc(N)c1N	C11H18N2	178.27	2.6	9.625	-7.025	0.071
71604-74-5	m-(2,3-epoxypropoxy)-n,n-bis(2,3-epoxypropyl)aniline;3-(oxiran-2-ylmethoxy)-n,n-bis(oxiran-2-ylmethyl)aniline;oxiranemethanamine, n-[3-(oxiranylmethoxy)phenyl]-n-(oxiranylmethyl)-;m-(2,3-epoxypropoxy)-n,n-bis(2,3-epoxypropyl)aniline 3-(oxiran-2-ylmethoxy)-n,n-bis(oxiran-2-ylmethyl)aniline oxiranemethanamine, n-[3-(oxiranylmethoxy)phenyl]-n-(oxiranylmethyl)-	YES (Step 1)	NO	2.75	NO	NO	10	TRUE	10	10	High		TRUE	227.5	63.75	YES	YES	TRUE	TRUE	105	105		JOINT	MUTA-STOT RE		x	x	x	10	10	10	10	10	10	10	10	10	10	10	10		C1C(CN(CC2CO2)c2cccc(OCC3CO3)c2)O1	C15H19NO4	277.3	0.87	11.547	-10.677	0.0144
121158-58-5	phenol, dodecyl-, branched	Excluded (structure not representative)	NO	3.3	NO	NO	8	TRUE	10	10	High		TRUE	226.4	63.2	YES	YES	TRUE	TRUE	112	112		HARMON	REPR		x		x	10	10	10	10	6	10	6	6	6	6	6	6		CCCCCCCCCCCCc1cccc(O)c1	C18H30O	262.42	7.46	10.702	-3.242	4.08
26471-62-5	toluene diisocyanate;toluene diisocyanate, commercial grade (2,4 (80%)- and 2,6 (20%)-);2,4/2,6-toluenediisocyanate;isocyanic acid, methyl-m-phenylene ester;tolylene diisocyanate;benzene, 1,3-diisocyanatomethyl-;m-tolylidene diisocyanate;2,4-diisocyanato-1-methylbenzene;mtolylidenediisocyanate(toluene diisocyanate);2,4/2,6-toluenediisocyanate mixture;reaction mass of 4-methyl-m-phenylene diisocya…	YES (Step 1)	NO	9	NO	NO	10	TRUE	6	10	High		TRUE	226	63	YES	YES	TRUE	TRUE	113	113		HARMON	CARC					3	3	3	3	3	3	3	3	6	3	6	3		Cc1ccc(N=C=O)cc1N=C=O	C9H6N2O2	174.15	3.74	7.083	-3.343	0.425
64741-60-2	distillates (petroleum), intermediate catalytic cracked;distillates, petroleum, intermediate catalytic cracked;distillates(petroleum),intermediatecatalytic cracked;distillates (petroleum), intermediate catalytic cracked distillates, petroleum, intermediate catalytic cracked distillates(petroleum),intermediatecatalytic cracked	Excluded (petroleum product)	NO	9	NO	NO	10	TRUE	6	10	High		TRUE	226	63	YES	YES	TRUE	TRUE	113	113		HARMON	CARC					6	6	6	6	6	6	6	6	6	6	6	6		c1cccc2ccc3ccccc3c12	C14H10	178.22	4.46	7.222	-2.762	2.55
64742-52-5	petroleum distillates, hydrotreated heavy naphthenic;distillates (petroleum), hydrotreated heavy naphthenic;distillates, petroleum, hydrotreated heavy naphthenic;distillates(petroleum),hydrotreatedheavy naphthenic,iftheycontain>3%w/wdmso extract;distillates (petroleum), hydrotreated (mild) heavy naphthenic (9ci);petroleum distillates, hydrotreated heavy naphthenic distillates (petroleum), hydrotr…	Excluded (petroleum product)	NO	9	NO	NO	10	TRUE	6	10	High		TRUE	226	63	YES	YES	TRUE	TRUE	113	113		HARMON	CARC					3	3	3	6	6	6	6	6	1	6	1	6		CCCCCCC1CCCC(CC(CC)CCCCC)C1	C21H42	294.54	10.32	7.456	2.864	147
64742-57-0	residual oils (petroleum), hydrotreated;residual oils, petroleum, hydrotreated;residualoils(petroleum),hydrotreated,if they contain> 3%w/w dmsoextract;residual oils (petroleum), hydrotreated residual oils, petroleum, hydrotreated residualoils(petroleum),hydrotreated,if they contain> 3%w/w dmsoextract	Excluded (petroleum product)	NO	9	NO	NO	10	TRUE	6	10	High		TRUE	226	63	YES	YES	TRUE	TRUE	113	113		HARMON	CARC					6	6	3	6	6	6	6	6	1	6	1	6		CCCC1CC(CC)C2C(C1)CC(CCC)CC2CC	C20H38	278.5	8.81	6.425	2.385	491
64742-67-2	foots oil (petroleum);foots oil, petroleum;footsoil(petroleum),ifitcontains>3% w/wdmsoextract;foots oil (petroleum) foots oil, petroleum footsoil(petroleum),ifitcontains>3% w/wdmsoextract	Excluded (petroleum product)	NO	9	NO	NO	10	TRUE	6	10	High		TRUE	226	63	YES	YES	TRUE	TRUE	113	113		HARMON	CARC					3	1	3	3	3	3	6	6	1	6	1	3		CCCCCC(CCC(C)CC)CC(CCC)CCC	C20H42	282.53	9.94	6.373	3.567	58.9
72623-87-1	lubricating oils (petroleum), c20-50, hydrotreated neutral oil-based;lubricating oils, petroleum, c20-50, hydrotreated neutral oil-based;lubricating oils, petroleum, c20-50, hydrotreated neutral oil based;lubricatingoils(petroleum),c2050,hydrotreatedneutraloilbased,iftheycontain>3%w/wdmsoextract;lubricating oils (petroleum), c20-50, hydrotreated neutral oil-based lubricating oils, petroleum, c20-…	Excluded (petroleum product)	NO	9	NO	NO	10	TRUE	6	10	High		TRUE	226	63	YES	YES	TRUE	TRUE	113	113		HARMON	CARC					3	6	3	6	3	6	6	3	1	3	1	3		CC(C)C1CCC2C(C1)CCC1C2(C)CCCC1(C)C	C20H36	276.48	7.87	5.84	2.03	120
108-45-2	1,3-phenylenediamine (3-aminoaniline);1,3-benzenediamine;m-phenylenediamine;benzene-1,3-diamine;3-amino-aniline;phenylenediamine, m-;3-phenylenediamine;mphenylenediamine anditssalts;m-phenylenediamin;1,3-benzenediamine (m-phenylenediamine);1,3-phenylenediamine;1,3-phenylenediamine *;1,3-phenylenediamine (3-aminoaniline) 1,3-benzenediamine m-phenylenediamine benzene-1,3-diamine 3-amino-aniline phe…	YES (Step 1)	YES	2.3	NO	NO	10	TRUE	10	10	High		TRUE	223	61.5	YES	YES	TRUE	TRUE	119	119		HARMON	MUTA			x		6	6	6	6	6	6	6	6	10	6	10	6		Nc1cccc(N)c1	C6H8N2	108.14	-0.33	6.962	-7.292	0.0139
64741-67-9	residues (petroleum), catalytic reformer fractionator;residues, petroleum, catalytic reformer fractionator;residues(petroleum),catalyticreformer fractionator;residues (petroleum), catalytic reformer fractionator residues, petroleum, catalytic reformer fractionator residues(petroleum),catalyticreformer fractionator	Excluded (petroleum product)	NO	8	NO	NO	10	TRUE	6	10	High		TRUE	216	58	YES	YES	TRUE	TRUE	120	120		HARMON	CARC					6	6	6	6	6	6	6	6	6	6	6	6		c1cccc2ccc3ccccc3c12	C14H10	178.22	4.46	7.222	-2.762	2.55
68187-58-6	pitch, petroleum, arom.;pitch, petroleum;aromatic petroleum pitch;pitch, petroleum, arom. pitch, petroleum aromatic petroleum pitch	Excluded (petroleum product)	NO	8	NO	NO	10	TRUE	6	10	High		TRUE	216	58	YES	YES	TRUE	TRUE	120	120		JOINT	CARC-MUTA-REPR					3	3	6	6	6	6	6	3	6	6	6	6		c1cccc2cc3ccccc3cc12	C14H10	178.22	4.45	7.093	-2.643	2.54
84852-15-3	phenol, 4-nonyl-, branched;phenol, 4-nonyl-, branched,;p-nonylphenol;4nonylphenol,branched[2];4-nonylphenol, branched;4-nonylphenol branched;4-(2,4-dimethylheptan-3-yl)phenol;phenol, 4-nonyl-, branched phenol, 4-nonyl-, branched, p-nonylphenol 4nonylphenol,branched[2] 4-nonylphenol, branched 4-nonylphenol branched 4-(2,4-dimethylheptan-3-yl)phenol	YES (Step 1)	NO	8	NO	NO	10	TRUE	6	10	High		TRUE	216	58	YES	YES	TRUE	TRUE	120	120		HARMON	REPR					6	6	6	6	6	6	6	6	6	6	6	6		CC(C)CCCCCCc1ccc(O)cc1	C15H24O	220.34	5.92	9.532	-3.612	1.39
98-54-4	4-tert-butylphenol;4-(tert.)butylphenol;p-t-butylyphenol;phenol, 4-(1,1-dimethylethyl)-;p-tert-butylphenol;4-tert-butyl-phenol;p-tert-butyl phenol;4-(1,1-dimethylethyl)phenol;4tertbutylphenol;phenol, p-tert-butyl-;butylphen;4-(1,1-dimethylethyl) phenol;4-tert-butylphenol (phenol, 4-(1,1-dimethylethyl)-) (p-tert-butylphenol);4-tert-butylphenol 4-(tert.)butylphenol p-t-butylyphenol phenol, 4-(1,1-d…	YES (Step 1)	NO	8	NO	NO	10	TRUE	6	10	High		TRUE	216	58	YES	YES	TRUE	TRUE	120	120		HARMON	REPR					6	6	6	6	3	6	3	3	6	6	6	6		CC(C)(C)c1ccc(O)cc1	C10H14O	150.21	3.31	7.623	-4.313	0.498
2873-97-4	diacetone acrylamide;n-(1,1-dimethyl-3-oxobutyl)acrylamide;n-(2-methyl-4-oxopentan-2-yl)prop-2-enamide;2-propenamide, n-(1,1-dimethyl-3-oxobutyl)-;acrylamide, n-(1,1-dimethyl-3-oxobutyl)-;diactone acrylamide;diacetone acrylamide n-(1,1-dimethyl-3-oxobutyl)acrylamide n-(2-methyl-4-oxopentan-2-yl)prop-2-enamide 2-propenamide, n-(1,1-dimethyl-3-oxobutyl)- acrylamide, n-(1,1-dimethyl-3-oxobutyl)- dia…	YES (Step 1)	NO	2.3	NO	NO	6	TRUE	10	10	High		TRUE	213.8	56.9	YES	YES	TRUE	TRUE	124	124		JOINT	REPR			x	x	6	6	10	10	10	10	10	10	10	10	10	10		CC(=O)CC(C)(C)NC(=O)C=C	C9H15NO2	169.21	-0.05	9.029	-9.079	0.00993
114798-26-4	losartan;1h-imidazole-5-methanol, 2-butyl-4-chloro-1-[[2'-(2h-tetrazol-5-yl)[1,1'-biphenyl]-4-yl]methyl]-;[2-butyl-4-chloro-1-({4-[2-(2h-1,2,3,4-tetrazol-5-yl)phenyl]phenyl}methyl)-1h-imidazol-5-yl]methanol;dup89 free acid;mk-0954 free acid;losartan free acid;lfa;-imidazole-5-methanol, 2-butyl-4-chloro-1-((2'-(1h-tetrazol-5-yl)(1,1'- biphenyl)-4-yl)methyl)-;(1-((2-(1h-tetrazol-5-yl)biphenyl-4-yl)…	YES (Step 1)	NO	1.3	NO	NO	10	TRUE	10	10	High		TRUE	213	56.5	YES	YES	TRUE	TRUE	125	125		INDIV	REPR		x	x	x	10	10	10	10	10	10	10	10	10	10	10	10		CCCCC1=NC(Cl)=C(CO)N1Cc1ccc(-c2ccccc2C2=NNN=N2)cc1	C22H23ClN6O	422.9	4.01	12	-7.99	1.06
119302-19-1	androstan-17-ol, 2,3-epoxy-16-(1-pyrrolidinyl)-, (2±,3±,5±,16?,17?)-;androstan-17-ol, 2,3-epoxy-16-(1-pyrrolidinyl)-, (2?,3?,5?,16?,17?)-;2,3-epoxy-1h-cyclopenta[a]phenanthrene,androstan-17-ol;androstan-17-ol, 2,3-epoxy-16-(1-pyrrolidinyl)-, (2±,3±,5±,16?,17?)- androstan-17-ol, 2,3-epoxy-16-(1-pyrrolidinyl)-, (2?,3?,5?,16?,17?)- 2,3-epoxy-1h-cyclopenta[a]phenanthrene,androstan-17-ol	YES (Step 1)	NO	1.3	NO	NO	10	TRUE	10	10	High		TRUE	213	56.5	YES	YES	TRUE	TRUE	125	125		INDIV	MUTA-REPR-STOT RE		x	x	x	10	10	10	10	10	10	10	10	10	10	10	10		CC12CCC3C(CCC4CC5C(CC34C)O5)C1CC(N1CCCC1)C2O	C23H37NO2	359.53	3.6	12	-8.4	2.21
134605-64-4	butafenacil;benzoic acid, 2-chloro-5-[3,6-dihydro-3-methyl-2,6-dioxo-4-(trifluoromethyl)-1(2h)-pyrimidinyl]-, 1,1-dimethyl-2-oxo-2-(2-propen-1-yloxy)ethyl ester;2-chloro-5-[3,6-dihydro-3-methyl-2,6-dioxo-4-(trifluoromethyl)-1(2h)-pyrimidinyl]benzoic acid 1,1-dimethyl-2-oxo-2-(2-propenyloxy)ethyl ester;(2-allyloxy-1,1-dimethyl-2-oxo-ethyl) 2-chloro-5-[3,6-dihydro-3-methyl-2,6-dioxo-4-(trifluoromet…	YES (Step 1)	NO	1.3	NO	NO	10	TRUE	10	10	High		TRUE	213	56.5	YES	YES	TRUE	TRUE	125	125		INDIV	STOT RE		x	x	x	10	10	10	10	10	10	10	10	10	6	10	10		CC(C)(C(=O)OCC=C)OC(=O)c1cc(N2C(=O)C=C(C(F)(F)F)N(C)C2=O)ccc1Cl	C20H18ClF3N2O6	474.8	2.45	12	-9.55	0.00293
13595-25-0	4,4'-(1,3-phenylenediisopropylidene)bisphenol;phenol, 4,4'-[1,3-phenylenebis(1-methylethylidene)]bis-;4,4'-(1,3-phenylene-bis(1-methylethylidene))bisphenol;4,4'-(1,3-phenylenediisopropylidene)bisphenol phenol, 4,4'-[1,3-phenylenebis(1-methylethylidene)]bis- 4,4'-(1,3-phenylene-bis(1-methylethylidene))bisphenol	YES (Step 1)	NO	1.3	NO	NO	10	TRUE	10	10	High		TRUE	213	56.5	YES	YES	TRUE	TRUE	125	125		HARMON	REPR		x	x	x	10	10	10	10	10	10	10	10	10	10	10	10		CC(C)(c1cccc(C(C)(C)c2ccc(O)cc2)c1)c1ccc(O)cc1	C24H26O2	346.44	6.25	12	-5.75	7.04
13951-70-7	11?,16±,17,21-tetrahydroxypregna-1,4-diene-3,20-dione;(11beta,16alpha)-11,16,17,21-tetrahydroxypregna-1,4-diene-3,20-dione;11?,16?,17,21-tetrahydroxypregna-1,4-diene-3,20-dione;11β,16α,17,21-tetrahydroxypregna-1,4-diene-3,20-dione;16alpha-hydroxyprednisolone;11?,16±,17,21-tetrahydroxypregna-1,4-diene-3,20-dione (11beta,16alpha)-11,16,17,21-tetrahydroxypregna-1,4-diene-3,20-dione 11?,16?,17,21-tet…	YES (Step 1)	NO	1.3	NO	NO	10	TRUE	10	10	High		TRUE	213	56.5	YES	YES	TRUE	TRUE	125	125		INDIV	REPR-STOT RE			x	x	6	6	10	10	10	10	6	6	10	6	10	10		CC12CC(O)C3C(CCC4=CC(=O)C=CC34C)C1CC(O)C2(O)C(=O)CO	C21H28O6	376.43	1.06	8.453	-7.393	0.032
2312-35-8	propargite;2-(4-tert-butylphenoxy)cyclohexyl prop-2-yn-1-yl sulfite;sulfurous acid, 2-[4-(1,1-dimethylethyl)phenoxy]cyclohexyl 2-propynyl ester;propargite(iso);2-[4-(1,1-dimethylethyl)phenoxy]cyclohexyl-2-propynyl ester sulfurous acid;2-(4-tert-butylphenoxy)cyclohexyl prop-2-ynyl sulphite;propargite (omite technical);sulfurous acid, 2-(4-(1,1-dimethylethyl)phenoxy)cyclohexyl 2-propynyl ester;prop…	YES (Step 1)	NO	1.3	NO	NO	10	TRUE	10	10	High		TRUE	213	56.5	YES	YES	TRUE	TRUE	125	125		HARMON	CARC		x	x	x	6	10	10	10	6	10	6	6	10	6	10	6		CC(C)(C)c1ccc(OC2CCCCC2OS(=O)OCC#C)cc1	C19H26O4S	350.46	5	9.582	-4.582	3.47
25092-32-4	pregna-1,4-diene-3,20-dione, 21-(acetyloxy)-9,11-epoxy-16,17-[(1-methylethylidene)bis(oxy)]-, (9?,11?,16?)-;(9,11)ß-epoxide-16α,17α,21-trihydroxypregna-1,4-diene-3,20-dione, 21-acetate, 16,17-acetonide;pregna-1,4-diene-3,20-dione, 21-(acetyloxy)-9,11-epoxy-16,17-[(1-methylethylidene)bis(oxy)]-, (9β,11β,16α)-;pregna-1,4-diene-3,20-dione, 21-(acetyloxy)-9,11-epoxy-16,17-[(1-methylethylidene)bis(oxy…	YES (Step 1)	NO	1.3	NO	NO	10	TRUE	10	10	High		TRUE	213	56.5	YES	YES	TRUE	TRUE	125	125		JOINT	REPR		x	x	x	10	10	10	10	10	10	10	10	10	10	10	10		CC(=O)OCC(=O)C12C(CC3C4CCC5=CC(=O)C=CC5(C)C44C(CC13C)O4)OC(C)(C)O2	C26H32O7	456.51	3.06	12	-8.94	0.517
284461-73-0	2-pyridinecarboxamide, 4-[4-[[[[4-chloro-3-(trifluoromethyl)phenyl]amino]carbonyl]amino]phenoxy]-n-methyl-;sorafenib;4-(4-((((4-chloro-3-(trifluoromethyl)phenyl)amino)carbonyl)amino)phenoxy)-n-methyl-2-pyridinecarboxamide;2-pyridinecarboxamide, 4-[4-[[[[4-chloro-3-(trifluoromethyl)phenyl]amino]carbonyl]amino]phenoxy]-n-methyl- sorafenib 4-(4-((((4-chloro-3-(trifluoromethyl)phenyl)amino)carbonyl)a…	YES (Step 1)	NO	1.3	NO	NO	10	TRUE	10	10	High		TRUE	213	56.5	YES	YES	TRUE	TRUE	125	125		INDIV	REPR-STOT RE		x	x	x	10	10	10	10	10	10	6	6	10	6	10	6		CNC(=O)c1cc(Oc2ccc(NC(=O)Nc3ccc(Cl)c(C(F)(F)F)c3)cc2)ccn1	C21H16ClF3N4O3	464.81	5.3	12	-6.7	0.141
33125-90-5	6ß-chloro-17α-hydroxypregna-4-ene-3,20-dione, 17-acetate	YES (Step 1)	NO	1.3	NO	NO	10	TRUE	10	10	High		TRUE	213	56.5	YES	YES	TRUE	TRUE	125	125		INDIV	REPR		x	x	x	10	10	10	10	10	10	10	10	10	10	10	10		CC(=O)C1(OC(C)=O)CCC2C3CC(Cl)C4=CC(=O)CCC4(C)C3CCC12C	C23H31ClO4	406.92	3.85	11.653	-7.803	0.411
38680-83-0	9?,11?-epoxy-17,21-dihydroxypregna-1,4-diene-3,20-dione 21-acetate;(9beta,11beta)-17-hydroxy-3,20-dioxo-9,11-epoxypregna-1,4-dien-21-yl acetate;9β,11β-epoxy-17,21-dihydroxypregna-1,4-diene-3,20-dione 21-acetate;9?,11?-epoxy-17,21-dihydroxypregna-1,4-diene-3,20-dione 21-acetate (9beta,11beta)-17-hydroxy-3,20-dioxo-9,11-epoxypregna-1,4-dien-21-yl acetate 9β,11β-epoxy-17,21-dihydroxypregna-1,4-diene…	YES (Step 1)	NO	1.3	NO	NO	10	TRUE	10	10	High		TRUE	213	56.5	YES	YES	TRUE	TRUE	125	125		JOINT	REPR		x	x	x	10	10	10	10	10	10	10	10	10	10	10	10		CC(=O)OCC(=O)C1(O)CCC2C3CCC4=CC(=O)C=CC4(C)C33C(CC12C)O3	C23H28O6	400.45	1.79	12	-10.21	0.0543
50-24-8	prednisolone;pregna-1,4-diene-3,20-dione, 11,17,21-trihydroxy-, (11?)-;(11beta)-11,17,21-trihydroxypregna-1,4-diene-3,20-dione;pregna-1,4-diene-3,20-dione, 11,17,21-trihydroxy-, (11.beta.)-;pregna-1,4-diene-3,20-dione, 11,17,21-trihydroxy-, (11 )-;pregna-1,4-diene-3,20-dione, 11.beta.,17,21-trihydroxy-;pregna-1,4-diene-3,20-dione, 11,17,21-trihydroxy-, (11.beta.);11,17,21-trihydroxypregna-1,4-die…	YES (Step 1)	NO	1.3	NO	NO	10	TRUE	10	10	High		TRUE	213	56.5	YES	YES	TRUE	TRUE	125	125		JOINT	REPR			x		6	6	6	6	6	6	6	6	10	6	10	6		CC12CC(O)C3C(CCC4=CC(=O)C=CC34C)C1CCC2(O)C(=O)CO	C21H28O5	360.43	1.62	7.575	-5.955	0.073
53-16-7	estrone;ethrone;3-hydroxyestra-1(10),2,4-trien-17-one;estra-1,3,5(10)-trien-17-one, 3-hydroxy-;3-hydroxyestra-1,3,5(10)trien-17-one;3-hydroxyestra-1,3,5(10)-trien-17-one;3-hydroxy-13-methyl- 6,7,8,9,11,12,13,14,15,16- decahydrocyclopenta[a]phenanthren- 17- one;estrone (e1);estrone ethrone 3-hydroxyestra-1(10),2,4-trien-17-one estra-1,3,5(10)-trien-17-one, 3-hydroxy- 3-hydroxyestra-1,3,5(10)trien-…	YES (Step 1)	NO	1.3	NO	NO	10	TRUE	10	10	High		TRUE	213	56.5	YES	YES	TRUE	TRUE	125	125		JOINT	CARC-REPR		x	x	x	10	10	10	10	10	10	10	10	10	6	10	10		CC12CCC3C(CCc4cc(O)ccc34)C1CCC2=O	C18H22O2	270.35	3.13	10.939	-7.809	0.0335
5534-13-4	9-fluoro-11?,17,21-trihydroxy-16?-methylpregna-1,4-diene-3,20-dione 17-propionate;(11beta,16beta)-9-fluoro-11,21-dihydroxy-16-methyl-3,20-dioxopregna-1,4-dien-17-yl propanoate;9-fluoro-11β,17,21-trihydroxy-16β-methylpregna-1,4-diene-3,20-dione 17-propionate;9-fluoro-11?,17,21-trihydroxy-16?-methylpregna-1,4-diene-3,20-dione 17-propionate (11beta,16beta)-9-fluoro-11,21-dihydroxy-16-methyl-3,20-dio…	YES (Step 1)	NO	1.3	NO	NO	10	TRUE	10	10	High		TRUE	213	56.5	YES	YES	TRUE	TRUE	125	125		JOINT	REPR		x	x	x	10	10	10	10	10	10	10	10	10	10	10	10		CCC(=O)OC1(C(=O)CO)C(C)CC2C3CCC4=CC(=O)C=CC4(C)C3(F)C(O)CC12C	C25H33FO6	448.5	2.95	12	-9.05	0.0481
63-05-8	androstenedione;androst-4-ene-3,17-dione;4-androstene-3,17-dione (androstenedione);androstenedione androst-4-ene-3,17-dione 4-androstene-3,17-dione (androstenedione)	YES (Step 1)	NO	1.3	NO	NO	10	TRUE	10	10	High		TRUE	213	56.5	YES	YES	TRUE	TRUE	125	125		JOINT	CARC-REPR			x	x	6	6	10	10	10	10	6	6	10	10	10	10		CC12CCC3C(CCC4=CC(=O)CCC34C)C1CCC2=O	C19H26O2	286.39	2.75	8.573	-5.823	0.752
72498-89-6	9?,11?-epoxy-6?-fluoro-17,21-dihydroxypregna-1,4-diene-3,20-dione 17,21-di(acetate);9?,11?-epoxy-6±-fluoro-17,21-dihydroxypregna-1,4-diene-3,20-dione 17,21-di(acetate);(6alpha,9beta,11beta)-6-fluoro-3,20-dioxo-9,11-epoxypregna-1,4-diene-17,21-diyl diacetate;9?,11?-epoxy-6?-fluoro-17,21-dihydroxypregna-1,4-diene-3,20-dione 17,21-di(acetate) 9?,11?-epoxy-6±-fluoro-17,21-dihydroxypregna-1,4-diene-3,…	YES (Step 1)	NO	1.3	NO	NO	10	TRUE	10	10	High		TRUE	213	56.5	YES	YES	TRUE	TRUE	125	125		JOINT	REPR		x	x	x	10	10	10	10	10	10	10	10	10	10	10	10		CC(=O)OCC(=O)C1(OC(C)=O)CCC2C3CC(F)C4=CC(=O)C=CC4(C)C33C(CC12C)O3	C25H29FO7	460.47	2.28	12	-9.72	0.0256
77017-20-0	16±,17,21-trihydroxypregna-1,4,9(11)-triene-3,20-dione 21-acetate;(16alpha)-16,17-dihydroxy-3,20-dioxopregna-1,4,9(11)-trien-21-yl acetate;16?,17,21-trihydroxypregna-1,4,9(11)-triene-3,20-dione 21-acetate;16α,17,21-trihydroxypregna-1,4,9(11)-triene-3,20-dione 21-acetate;(8s,10s,13s,14s,16r,17s)-16,17,21-trihydroxypregna-1,4,9(11)-triene-3,20-dione 21-acetate;16±,17,21-trihydroxypregna-1,4,9(11)-t…	YES (Step 1)	NO	1.3	NO	NO	10	TRUE	10	10	High		TRUE	213	56.5	YES	YES	TRUE	TRUE	125	125		JOINT	REPR		x	x	x	10	10	10	10	10	10	10	10	10	10	10	10		CC(=O)OCC(=O)C1(O)C(O)CC2C3CCC4=CC(=O)C=CC4(C)C3=CCC12C	C23H28O6	400.45	3.26	12	-8.74	0.0631
96-96-8	2-nitro-p-anisidine;benzenamine, 4-methoxy-2-nitro-;4-methoxy-2-nitroaniline;p-anisidine, 2-nitro-;2-nitro-p-anisidine benzenamine, 4-methoxy-2-nitro- 4-methoxy-2-nitroaniline p-anisidine, 2-nitro-	YES (Step 1)	NO	1.3	NO	NO	10	TRUE	10	10	High		TRUE	213	56.5	YES	YES	TRUE	TRUE	125	125		HARMON	STOT RE			x		6	6	6	6	6	6	6	6	10	6	10	6		COc1ccc(N)c(N(=O)=O)c1	C7H8N2O3	168.14	1.94	8.341	-6.401	0.0732
101-80-4	4,4'-oxydianiline;4,4’-oxydianiline;4-aminophenyl ether;4,4'-diaminodiphenyl ether;benzenamine, 4,4'-oxybis-;4,4?oxydianiline(paminophenyl ether) anditssalts;aniline, 4,4'-oxydi-;4,4´-diaminodiphenylether;4,4'-diaminodiphenyl ether (4,4'-oxydianiline);4,4'-oxydianiline 4,4’-oxydianiline 4-aminophenyl ether 4,4'-diaminodiphenyl ether benzenamine, 4,4'-oxybis- 4,4?oxydianiline(paminophenyl ether) a…	YES (Step 1)	NO	1.25	NO	NO	10	TRUE	10	10	High		TRUE	212.5	56.25	YES	YES	TRUE	TRUE	142	142		HARMON	CARC-MUTA-REPR		x	x	x	10	10	10	10	10	10	10	10	10	10	10	10		Nc1ccc(Oc2ccc(N)cc2)cc1	C12H12N2O	200.23	1.36	10.581	-9.221	0.099
117704-25-3	avermectin a1a, 25-cyclohexyl-5-o-demethyl-25-de(1-methylpropyl)-;25-cyclohexyl-5-o-demethyl-25-de(1-methylpropyl)avermectin a1a;avermectin a1a, 25-cyclohexyl-5-o-demethyl-25-de(1-methylpropyl)- 25-cyclohexyl-5-o-demethyl-25-de(1-methylpropyl)avermectin a1a	YES (Step 1)	NO	1.25	NO	NO	10	TRUE	10	10	High		TRUE	212.5	56.25	YES	YES	TRUE	TRUE	142	142		JOINT	REPR		x	x	x	10	10	10	10	10	10	10	10	10	10	10	10		CC1C=CC=C2COC3C(O)C(C)=CC(C(=O)OC4CC(CC=C(C)C1OC1CC(OC)C(OC5CC(OC)C(O)C(C)O5)C(C)O1)OC1(C4)C=CC(C)C(C4CCCCC4)O1)C23O	C50H74O14	899.07	5.26	12	-6.74	49.7
14531-84-1	17b-hydroxyestra-4,6-diene-3-one;d6n;delta-6-nandrolone;6-dehydronandrolone;17-hydroxyestra-4,6-dien-3-one;4,6-estradien-17beta-ol-3-one;17b-hydroxyestra-4,6-diene-3-one d6n delta-6-nandrolone 6-dehydronandrolone 17-hydroxyestra-4,6-dien-3-one 4,6-estradien-17beta-ol-3-one	YES (Step 1)	NO	1.25	NO	NO	10	TRUE	10	10	High		TRUE	212.5	56.25	YES	YES	TRUE	TRUE	142	142		INDIV	CARC-REPR		x	x	x	10	10	10	10	10	10	10	10	10	10	10	10		CC12CCC3C4CCC(=O)C=C4C=CC3C1CCC2O	C18H24O2	272.37	2.6	9.71	-7.11	1.17
1671-49-4	benzene, 1-methyl-4-(methylsulfonyl)-2-nitro-;4-mesyl-2-nitrotoluene;1-methyl-4-(methylsulfonyl)-2-nitrobenzene;sulfone, methyl 3-nitro-p-tolyl;methyl 4-methyl-3-nitrophenyl sulfone;benzene, 1-methyl-4-(methylsulfonyl)-2-nitro- 4-mesyl-2-nitrotoluene 1-methyl-4-(methylsulfonyl)-2-nitrobenzene sulfone, methyl 3-nitro-p-tolyl methyl 4-methyl-3-nitrophenyl sulfone	YES (Step 1)	NO	1.25	NO	NO	10	TRUE	10	10	High		TRUE	212.5	56.25	YES	YES	TRUE	TRUE	142	142		HARMON	REPR			x	x	6	6	6	6	10	6	6	6	10	6	10	6		Cc1ccc(S(C)(=O)=O)cc1N(=O)=O	C8H9NO4S	215.22	0.93	7.584	-6.654	0.0762
24650-42-8	ethanone, 2,2-dimethoxy-1,2-diphenyl-;2,2-dimethoxy-1,2-diphenylethan-1-one;2,2-dimethoxy-1,2-diphenylethanone;benzil dimethyl acetal;ethanone, 2,2-dimethoxy-1,2-diphenyl- 2,2-dimethoxy-1,2-diphenylethan-1-one 2,2-dimethoxy-1,2-diphenylethanone benzil dimethyl acetal	YES (Step 1)	NO	1.25	NO	NO	10	TRUE	10	10	High		TRUE	212.5	56.25	YES	YES	TRUE	TRUE	142	142		INDIV	STOT RE		x	x	x	6	10	10	10	10	10	6	6	10	6	10	10		COC(c1ccccc1)(C(=O)c1ccccc1)OC	C16H16O3	256.28	2.95	9.753	-6.803	0.19
58-22-0	testosterone;testosterone [ban:inn];androst-4-en-3-one, 17-hydroxy-, (17?)-;(17beta)-17-hydroxyandrost-4-en-3-one;androst-4-en-3-one, 17-hydroxy-, (17.beta.)-;17-hydroxyandrost-4-en-3-one;androst-4-en-3-one, 17-hydroxy-, (17ß)-;testosterone testosterone [ban:inn] androst-4-en-3-one, 17-hydroxy-, (17?)- (17beta)-17-hydroxyandrost-4-en-3-one androst-4-en-3-one, 17-hydroxy-, (17.beta.)- 17-hydroxyan…	YES (Step 1)	NO	1.25	NO	NO	10	TRUE	10	10	High		TRUE	212.5	56.25	YES	YES	TRUE	TRUE	142	142		INDIV	CARC-REPR		x	x	x	10	10	10	10	10	10	10	10	10	10	10	10		CC12CCC3C(CCC4=CC(=O)CCC34C)C1CCC2O	C19H28O2	288.41	3.32	10.161	-6.841	1.5
75-87-6	chloral;acetaldehyde, 2,2,2-trichloro-;trichloroethanal;trichloroacetaldehyde;acetaldehyde, trichloro-;chloral, anhydrous	YES (Step 1)	NO	1.25	NO	NO	10	TRUE	10	10	High		TRUE	212.5	56.25	YES	YES	TRUE	TRUE	142	142		IARC	CARC			x	x	6	6	10	10	10	10	6	6	10	10	10	10		O=CC(Cl)(Cl)Cl	C2HCl3O	147.39	0.99	7.915	-6.925	0.263
84-51-5	2-ethylanthraquinone;9,10-anthracenedione, 2-ethyl-;2-ethylanthracene-9,10-dione;anthraquinone, 2-ethyl-;2-ethyl-9,10-anthraquinone;2-ethylanthraquinone 9,10-anthracenedione, 2-ethyl- 2-ethylanthracene-9,10-dione anthraquinone, 2-ethyl- 2-ethyl-9,10-anthraquinone	YES (Step 1)	NO	1.25	NO	NO	10	TRUE	10	10	High		TRUE	212.5	56.25	YES	YES	TRUE	TRUE	142	142		JOINT	STOT RE		x	x	x	10	10	10	10	10	10	10	10	10	6	10	10		CCc1ccc2c(c1)C(=O)c1ccccc1C2=O	C16H12O2	236.25	4.37	11.09	-6.72	0.432
3296-90-0	1,3-propanediol, 2,2-bis(brme)-;1,3-propanediol, 2,2-bis(bromomethyl)-;2,2-bis(bromomethyl)-1,3-propanediol;2,2-bis(bromomethyl)-1,3-propanediol, technical grade;2,2-bis(bromomethyl)propane-1,3-diol;2,2-bis(bromomethyl)-1,3-propandiol;2,2-bis(bromomethyl)-1,3-propanediol (1,3-propanediol, 2,2-bis(bromomethyl)-);1,3-propanediol, 2,2-bis(brme)- 1,3-propanediol, 2,2-bis(bromomethyl)- 2,2-bis(bromome…	YES (Step 1)	NO	1.25	NO	NO	8	TRUE	10	10	High		TRUE	210	55	YES	YES	TRUE	TRUE	150	150		IARC	CARC			x		6	6	6	6	6	6	6	6	10	6	10	6		OCC(CO)(CBr)CBr	C5H10Br2O2	261.95	1.06	7.84	-6.78	0.0218
1696-20-4	morpholine, 4-acetyl-;4-acetylmorpholine;1-(morpholin-4-yl)ethanone;morpholine, 4-acetyl- 4-acetylmorpholine 1-(morpholin-4-yl)ethanone	YES (Step 1)	NO	10	YES	NO	1	TRUE	10	10	High		TRUE	210	55	YES	YES	TRUE	TRUE	150	150		JOINT	REPR			x	x	6	6	6	6	10	6	6	6	10	6	10	6		CC(=O)N1CCOCC1	C6H11NO2	129.15	-0.87	6.951	-7.821	0.00751
64741-51-1	distillates (petroleum), heavy paraffinic;distillates, petroleum, heavy paraffinic;distillates(petroleum),heavy paraffinic;distillates (petroleum), heavy paraffinic distillates, petroleum, heavy paraffinic distillates(petroleum),heavy paraffinic	Excluded (petroleum product)	NO	10	NO	NO	1	TRUE	10	10	High		TRUE	210	55	YES	YES	TRUE	TRUE	150	150		HARMON	CARC			x		6	6	3	6	6	6	10	10	1	10	1	10		CCCCCCCCCCCCCCCC(CCC)CCCCCCCCCCC	C30H62	422.79	12	10.204	1.796	1700
64741-56-6	residues (petroleum), vacuum;residues, petroleum, vacuum;residues (petroleum), vacuum residues, petroleum, vacuum	Excluded (petroleum product)	NO	10	NO	NO	1	TRUE	10	10	High		TRUE	210	55	YES	YES	TRUE	TRUE	150	150		IARC	CARC		x	x		10	10	6	6	6	6	10	10	3	10	3	10		CCCCCCCCCCC(CCCCCCCCC)CCCCCC(CCCC)CCCCCC	C36H74	506.94	12	12	0	13100
64741-76-0	distillates (petroleum), heavy hydrocracked;distillates, petroleum, heavy hydrocracked;distillates(petroleum),heavyhydrocracked,ifthey contain> 3% w/wdmsoextract;distillates (petroleum), heavy hydrocracked distillates, petroleum, heavy hydrocracked distillates(petroleum),heavyhydrocracked,ifthey contain> 3% w/wdmsoextract	Excluded (petroleum product)	NO	10	NO	NO	1	TRUE	10	10	High		TRUE	210	55	YES	YES	TRUE	TRUE	150	150		HARMON	CARC			x		6	6	3	6	6	6	10	10	1	10	1	10		CCCCCCCC(CCCCCCC)CCCCCCCC(CCC)CCCC	C30H62	422.79	12	10.134	1.866	1770
64741-88-4	distillates (petroleum), solvent-refined heavy paraffinic;distillates, petroleum, solvent-refined heavy paraffinic;distillates, petroleum, solvent refined heavy paraffinic;distillates(petroleum),solventrefinedheavy paraffinic,iftheycontain>3%w/wdmso extract;distillates (petroleum), solvent-refined (mild) heavy paraffinic (9ci);distillates (petroleum), solvent-refined heavy paraffinic distillates,…	Excluded (petroleum product)	NO	10	NO	NO	1	TRUE	10	10	High		TRUE	210	55	YES	YES	TRUE	TRUE	150	150		HARMON	CARC			x		6	6	3	6	6	6	10	10	1	10	1	10		CCCCCCCC(CCCCCCC)CCCCCCCC(CCC)CCCC	C30H62	422.79	12	10.134	1.866	1770
107-06-2	ethane, 1,2-dichloro-;1,2-dichloroethane;methylene chloride;dichloroethane, 1,2-;ethylene dichloride;dichloroethanes (ethylenechlorides) e.g.1,2dichloroethane;1,2-dichloro-ethane;ethane, 1,2-dichloro- 1,2-dichloroethane methylene chloride dichloroethane, 1,2- ethylene dichloride dichloroethanes (ethylenechlorides) e.g.1,2dichloroethane 1,2-dichloro-ethane	NO	NO	10	NO	NO	10	TRUE	3	10	High		FALSE	209	54.5	YES	YES	TRUE	TRUE	156	156		HARMON	CARC					1	1	1	1	1	1	1	1	3	1	3	1		ClCCCl	C2H4Cl2	98.958	1.48	4	-2.52	0.272
64741-59-9	distillates (petroleum), light catalytic cracked;distillates, petroleum, light catalytic cracked;distillates(petroleum),lightcatalytic cracked;distillates (petroleum), light catalytic cracked distillates, petroleum, light catalytic cracked distillates(petroleum),lightcatalytic cracked	NO	NO	10	NO	NO	10	TRUE	3	10	High		FALSE	209	54.5	YES	YES	TRUE	TRUE	156	156		HARMON	CARC					3	3	3	3	3	3	3	3	3	3	3	3		c1cccc2ccccc12	C10H8	128.16	3.3	5.045	-1.745	4.53
64741-68-0	naphtha (petroleum), heavy catalytic reformed;naphtha, petroleum, heavy catalytic reformed;heavy catalytic reformed naphtha;naphtha (petroleum), heavy catalytic reformed naphtha, petroleum, heavy catalytic reformed heavy catalytic reformed naphtha	NO	NO	10	NO	NO	10	TRUE	3	10	High		FALSE	209	54.5	YES	YES	TRUE	TRUE	156	156		HARMON	CARC-MUTA					3	3	3	3	3	3	3	3	3	3	3	3		c1cccc2ccccc12	C10H8	128.16	3.3	5.045	-1.745	4.53
64742-95-6	high-flash aromatic naphtha, type 1;solvent naphtha (petroleum), light arom.;solvent naphtha, petroleum, light arom.;solvent naphtha, petroleum, light aromatic;aromatic naphtha, type i;high-flash aromatic naphtha, type 1 solvent naphtha (petroleum), light arom. solvent naphtha, petroleum, light arom. solvent naphtha, petroleum, light aromatic aromatic naphtha, type i	NO	NO	10	NO	NO	10	TRUE	3	10	High		FALSE	209	54.5	YES	YES	TRUE	TRUE	156	156		HARMON	CARC-MUTA					3	3	3	3	3	3	3	3	3	3	3	3		c1cccc2ccccc12	C10H8	128.16	3.3	5.045	-1.745	4.53
68333-25-5	distillates (petroleum), hydrodesulfurized light catalytic cracked;distillates, petroleum, hydrodesulfurized light catalytic cracked;distillates(petroleum),hydrodesulfurisedlightcatalyticcracked;distillates (petroleum), hydrodesulfurized light catalytic cracked distillates, petroleum, hydrodesulfurized light catalytic cracked distillates(petroleum),hydrodesulfurisedlightcatalyticcracked	NO	NO	10	NO	NO	10	TRUE	3	10	High		FALSE	209	54.5	YES	YES	TRUE	TRUE	156	156		HARMON	CARC					3	3	3	3	3	3	3	3	3	3	3	3		c1cccc2ccccc12	C10H8	128.16	3.3	5.045	-1.745	4.53
68391-11-7	pyridine, alkyl derivs.;pyridine, alkyl derivatives;pyridine, alkyl derivs. pyridine, alkyl derivatives	NO	NO	10	YES	NO	10	TRUE	3	10	High		FALSE	209	54.5	YES	YES	TRUE	TRUE	156	156		HARMON	CARC-MUTA					3	3	1	1	1	1	1	1	3	3	3	3		CCc1cc(C)ccn1	C8H11N	121.17	2.39	5.722	-3.332	0.0915
68527-27-5	naphtha (petroleum), full-range alkylate, butane-contg.;naphtha, petroleum, full-range alkylate, butane-contg.;naphtha, petroleum, full range alkylate, butane containing;naphtha (petroleum), full-range alkylate, butane-contg. naphtha, petroleum, full-range alkylate, butane-contg. naphtha, petroleum, full range alkylate, butane containing	NO	NO	10	NO	NO	10	TRUE	3	10	High		FALSE	209	54.5	YES	YES	TRUE	TRUE	156	156		HARMON	CARC-MUTA					1	1	1	1	1	1	3	1	1	1	1	1		CCC(C)CC(C)CC	C9H20	128.25	4.61	4	0.61	1.67
72623-86-0	lubricating oils (petroleum), c15-30, hydrotreated neutral oil-based;lubricating oils, petroleum, c15-30, hydrotreated neutral oil-based;lubricating oils, petroleum, c15-30, hydrotreated neutral oil based;lubricatingoils(petroleum),c1530,hydrotreatedneutraloilbased,iftheycontain>3%w/wdmsoextract;lubricating oils (petroleum), c15-30, hydrotreated neutral oil-based lubricating oils, petroleum, c15-…	NO	NO	10	NO	NO	10	TRUE	3	10	High		FALSE	209	54.5	YES	YES	TRUE	TRUE	156	156		HARMON	CARC					3	3	3	3	3	3	3	3	1	1	1	1		CCC1CCC2C(C1)CC(C)CC2CC	C15H28	208.37	6.43	4.66	1.77	76
8009-03-8	petrolatum;petrolatum,exceptifthefullrefininghistory isknownanditcanbeshownthatthe substancefromwhichitis producedisnota carcinogen;petrolatum petrolatum,exceptifthefullrefininghistory isknownanditcanbeshownthatthe substancefromwhichitis producedisnota carcinogen	Excluded (petroleum product)	NO	9	NO	NO	1	TRUE	10	10	High		TRUE	209	54.5	YES	YES	TRUE	TRUE	156	156		JOINT	CARC-REPR-STOT RE			x		3	3	3	6	3	6	10	10	1	10	1	10		CCCCCCCCCCCCC(CCCC)CCCCCCC	C24H50	338.63	12	7.991	4.009	269
64742-01-4	residual oils (petroleum), solvent-refined;residual oils, petroleum, solvent-refined;residual oils, petroleum, solvent, refined;residualoils(petroleum),solventrefined,if they contain> 3%w/w dmsoextract;residual oils (petroleum), solvent-refined residual oils, petroleum, solvent-refined residual oils, petroleum, solvent, refined residualoils(petroleum),solventrefined,if they contain> 3%w/w dmsoext…	Excluded (petroleum product)	NO	9	NO	NO	1	TRUE	10	10	High		TRUE	209	54.5	YES	YES	TRUE	TRUE	156	156		HARMON	CARC			x		6	6	3	6	6	6	10	10	1	10	1	10		CCCCCCCC(CCCCCCC)CCCCCCCC(CCC)CCCC	C30H62	422.79	12	10.134	1.866	1770
64741-89-5	distillates (petroleum), solvent-refined light paraffinic;distillates, petroleum, solvent-refined light paraffinic;distillates, petroleum, solvent refined light paraffinic;distillates(petroleum),solventrefinedlight paraffinic,iftheycontain>3%w/wdmso extract;distillates (petroleum), solvent-refined (mild) light paraffinic (9ci);distillates (petroleum), solvent-refined light paraffinic distillates,…	Excluded (petroleum product)	NO	9	NO	NO	8	TRUE	6	10	High		TRUE	208	54	YES	YES	TRUE	TRUE	166	166		HARMON	CARC					3	1	3	3	3	3	6	6	1	6	1	6		CCCCC(CCC)CCCCC(CCCC)CCCC	C21H44	296.56	10.51	6.819	3.691	98.8
111-77-3	diethylene glycol monomethyl ether;ethanol, 2-(2-methoxyethoxy)-;2-(2-methoxyethoxy)ethanol;2(2methoxyethoxy)ethanol(diethylene glycolmonomethylether;degme);diethyleneglycolmonomethyl ether;diethylene glycol methyl ether;diethylene glycol monomethyl ether (ethanol, 2-(2-methoxyethoxy)-);diethylene glycol monomethyl ether ethanol, 2-(2-methoxyethoxy)- 2-(2-methoxyethoxy)ethanol 2(2methoxyethoxy)et…	YES (Step 1)	NO	8	NO	NO	1	TRUE	10	10	High		TRUE	208	54	YES	YES	TRUE	TRUE	166	166		HARMON	REPR			x	x	3	3	6	6	10	6	6	6	10	6	10	6		COCCOCCO	C5H12O3	120.14	-1.18	6.396	-7.576	0.0106
117-81-7	diethylhexyl phthalate;phthalic acid, di-2-ethylhexylester (dehp);di-(2-ethylhexyl) phthalate;bis(2-ethylhexyl)phthalate;1,2-benzenedicarboxylic acid, 1,2-bis(2-ethylhexyl) ester;di(2-ethylhexyl) phthalate;di(2-ethylhexyl)phthalate;bis(2-ethylhexyl) phthlate;di (2-ethylhexyl) phthalate (dehp);1,2-benzenedicarboxylic acid, bis(2-ethylhexyl) ester;diethylhexyl phthalate (dehp);bis(2-ethylhexyl) pht…	YES (Step 1)	NO	8	NO	NO	1	TRUE	10	10	High		TRUE	208	54	YES	YES	TRUE	TRUE	166	166		HARMON	REPR		x		x	10	10	10	10	10	10	6	6	6	6	6	6		CCCCC(CC)COC(=O)c1ccccc1C(=O)OCC(CC)CCCC	C24H38O4	390.54	7.6	12	-4.4	0.664
64741-95-3	residual oils (petroleum), solvent deasphalted;residual oils, petroleum, solvent deasphalted;residualoils(petroleum),solvent deasphalted,ifthey contain>3%w/w dmsoextract;residual oils (petroleum), solvent deasphalted residual oils, petroleum, solvent deasphalted residualoils(petroleum),solvent deasphalted,ifthey contain>3%w/w dmsoextract	Excluded (petroleum product)	NO	8	NO	NO	1	TRUE	10	10	High		TRUE	208	54	YES	YES	TRUE	TRUE	166	166		HARMON	CARC			x		6	6	3	6	6	6	10	10	1	10	1	10		CCCCCCCC(CCCCCCC)CCCCCCCC(CCC)CCCC	C30H62	422.79	12	10.134	1.866	1770
118-96-7	trinitrotoluene;trinitrotoluene, 2,4,6-;2,4,6-trinitrotoluene;benzene, 2-methyl-1,3,5-trinitro-;2,4,6-trinitrotoluene (tnt);2-methyl-1,3,5-trinitrobenzene;toluene, 2,4,6-trinitro-;trinitrotoluene trinitrotoluene, 2,4,6- 2,4,6-trinitrotoluene benzene, 2-methyl-1,3,5-trinitro- 2,4,6-trinitrotoluene (tnt) 2-methyl-1,3,5-trinitrobenzene toluene, 2,4,6-trinitro-	YES (Step 1)	NO	7	NO	NO	10	TRUE	6	10	High		TRUE	206	53	YES	YES	TRUE	TRUE	170	170		HARMON	STOT RE					6	6	6	6	6	6	3	3	6	6	6	6		Cc1c(N(=O)=O)cc(N(=O)=O)cc1N(=O)=O	C7H5N3O6	227.12	1.6	7.67	-6.07	0.0318
119-61-9	benzophenone;methanone, diphenyl-;diphenylmethanone;diphenyl methanone;diphenyl ketone;benzophenone (methanone, diphenyl-);benzophenone methanone, diphenyl- diphenylmethanone diphenyl methanone diphenyl ketone benzophenone (methanone, diphenyl-)	YES (Step 1)	NO	7	NO	NO	10	TRUE	6	10	High		TRUE	206	53	YES	YES	TRUE	TRUE	170	170		IARC	CARC					6	6	3	3	3	3	3	3	6	3	6	3		O=C(c1ccccc1)c1ccccc1	C13H10O	182.21	3.18	7.281	-4.101	0.248
149-30-4	2-mercaptobenzothiazole;2(3h)-benzothiazolethione;2-mercaptobenzothiazol;2-mercaptobenzothiazole (mbt);benzothiazole-2-thiol;1,3-benzothiazole-2(3h)-thione;2-benzothiazolethiolvan;2-benzothiazolinethione;captax;1,3-benzothiazole-2-thiol;name 1,3-benzothiazole-2(3h)-thione;2-mercaptobenzothiazole (2(3h)-benzothiazolethione);2-mercaptobenzothiazole 2(3h)-benzothiazolethione 2-mercaptobenzothiazol 2…	YES (Step 1)	NO	7	NO	NO	10	TRUE	6	10	High		TRUE	206	53	YES	YES	TRUE	TRUE	170	170		IARC	CARC					6	6	6	6	6	6	6	6	6	6	6	6		SC1=Nc2ccccc2S1	C7H5NS2	167.24	2.42	8.249	-5.829	0.0668
64742-44-5	distillates (petroleum), clay-treated heavy naphthenic;paraffin waxes, petroleum, clay-treated;distillates, petroleum, clay-treated heavy naphthenic;distillates, petroleum, clay treated heavy naphthenic;distillates(petroleum),claytreatedheavy naphthenic,iftheycontain>3%w/wdmso extract;distillates (petroleum), clay-treated heavy naphthenic paraffin waxes, petroleum, clay-treated distillates, petro…	Excluded (petroleum product)	NO	7	NO	NO	10	TRUE	6	10	High		TRUE	206	53	YES	YES	TRUE	TRUE	170	170		HARMON	CARC					6	6	3	6	6	6	6	6	1	6	1	6		CCCC1CC(CC)C2C(C1)CC(CCC)CC2CC	C20H38	278.5	8.81	6.425	2.385	491
72623-85-9	lubricating oils (petroleum), c20-50, hydrotreated neutral oil-based, high-viscosity;lubricating oils, petroleum, c15-30, hydrotreated neutral oil-based, contg. solvent deasphalted residual oil;lubricating oils, petroleum, c20-50, hydrotreated neutral oil-based, high-viscosity;lubricating oils, petroleum, c20-50, hydrotreated neutral oil based, high viscosity;lubricatingoils(petroleum),c2050,hydr…	Excluded (petroleum product)	NO	7	NO	NO	10	TRUE	6	10	High		TRUE	206	53	YES	YES	TRUE	TRUE	170	170		HARMON	CARC					3	6	3	6	3	6	3	3	1	3	1	3		CC(C)C1CCC2C(C1)CC(C)C1CC(C)C(C)CC21	C20H36	276.48	7.8	5.77	2.03	324
78-50-2	phosphine oxide, trioctyl-;trioctylphosphine oxide;trioctylphosphane oxide;phosphine oxide, trioctyl- trioctylphosphine oxide trioctylphosphane oxide	YES (Step 1)	NO	6	NO	NO	1	TRUE	10	10	High		TRUE	206	53	YES	YES	TRUE	TRUE	170	170		JOINT	REPR			x		6	6	6	6	6	6	10	10	3	10	3	10		CCCCCCCCP(=O)(CCCCCCCC)CCCCCCCC	C24H51OP	386.62	9.54	9.849	-0.309	55.9
97-99-4	tetrahydrofurfuryl alcohol;2-furanmethanol, tetrahydro-;2-furanmethanol, tetrahydro;tetrahydrofuran-2-ylmethanol;furfuryl alcohol, tetrahydro-;tetrahydro-2-furanylmethanol;thfa;tetrahydrofurfuryl alcohol (2-furanmethanol, tetrahydro-);furfuryl alcohol, tetrahydro- (8ci);tetrahydrofurfuryl alcohol 2-furanmethanol, tetrahydro- 2-furanmethanol, tetrahydro tetrahydrofuran-2-ylmethanol furfuryl alcoho…	YES (Step 1)	NO	6	NO	NO	1	TRUE	10	10	High		TRUE	206	53	YES	YES	TRUE	TRUE	170	170		HARMON	REPR			x		6	6	6	6	6	6	6	6	10	6	6	6		OCC1CCCO1	C5H10O2	102.13	-0.11	6.667	-6.777	0.0256
120-80-9	catechol;catechol (1,2-dihydroxybenzene);1,2-benzenediol;benzene-1,2-diol;pyrocatechine;pyrocatechol;pyrocatechol(catechol);1,2-dihydroxybenzene;catechol (1,2-benzenediol) (pyrocatechol);catechol (lot 1);catechol (lot 2);catechol catechol (1,2-dihydroxybenzene) 1,2-benzenediol benzene-1,2-diol pyrocatechine pyrocatechol pyrocatechol(catechol) 1,2-dihydroxybenzene catechol (1,2-benzenediol) (pyroc…	YES (Step 1)	NO	5.5	NO	NO	1	TRUE	10	10	High		TRUE	205.5	52.75	YES	YES	TRUE	TRUE	177	177		IARC	CARC			x		6	6	6	6	6	6	6	6	10	6	10	6		Oc1ccccc1O	C6H6O2	110.11	0.88	8.189	-7.309	0.0139
924-42-5	n-methylolacrylamide;2-propenamide, n-(hydroxymethyl)-;acrylamide, n-(hydroxymethyl)-;methylolacrylamide, n-;n-(hydroxymethyl)acrylamide;n-(hydroxymethyl)prop-2-enamide;n-(hydroxymethyl)-2-propenamide n-methanolacrylamide n-methylolacrylamide monomethylolacrylamide nci-c60333 2-propenamide, n-(hydroxymethyl)- uramine t 80 nma;n-hydroxymethylacrylamide;n-methylolacrylamide 2-propenamide, n-(hydrox…	NO (evaluated)	NO	3.75	NO	NO	1	FALSE	10	10	High		FALSE	203.75	51.875	YES	YES	TRUE	TRUE	178	178		JOINT	CARC-MUTA-REPR-STOT RE			x	x	6	6	10	10	10	10	6	6	10	6	10	6		C=CC(=O)NCO	C4H7NO2	101.1	-1.81	7.603	-9.413	0.00205
123-31-9	hydroquinone (1,4-dihydroxybenzene);hydroquinone;1,4-benzenediol;benzene-1,4-diol;hydrquinone;1,4-dihydroquinone;1,4-hydroquinone;hydroquinone (1,4-benzenediol);1,4-hydrochinone;1,4-dihydroquinone (contam w/ benzoquinone);hydroquinone (1,4-dihydroxybenzene) hydroquinone 1,4-benzenediol benzene-1,4-diol hydrquinone 1,4-dihydroquinone 1,4-hydroquinone hydroquinone (1,4-benzenediol) 1,4-hydrochinone…	YES (Step 2)	NO	3.3	NO	NO	1	FALSE	10	10	High		FALSE	203.3	51.65	YES	YES	TRUE	TRUE	179	179		HARMON	CARC-MUTA			x	x	6	6	10	10	10	10	10	10	10	6	10	10		Oc1ccc(O)cc1	C6H6O2	110.11	0.59	9.304	-8.714	0.0113
5117-12-4	2-propen-1-one, 1-(4-morpholinyl)-;morpholine, 4-(1-oxo-2-propenyl)-;4-(1-oxo-2-propenyl)-morpholine;2-propen-1-one, 1-(4-morpholinyl)- morpholine, 4-(1-oxo-2-propenyl)- 4-(1-oxo-2-propenyl)-morpholine	NO (evaluated)	NO	2.75	NO	NO	1	FALSE	10	10	High		FALSE	202.75	51.375	YES	YES	TRUE	TRUE	180	180		JOINT	STOT RE			x	x	6	6	10	10	10	6	6	6	10	6	10	6		C=CC(=O)N1CCOCC1	C7H11NO2	141.16	-0.52	7.578	-8.098	0.0101
142-16-5	2-butenedioic acid (z)-, bis(2-ethylhexyl) ester;bis(2-ethylhexyl) maleate;2-butenedioic acid (2z)-, bis(2-ethylhexyl) ester;bis(2-ethylhexyl) (2z)-but-2-enedioate;2-butenedioic acid, (z)-, bis(2-ethylhexyl) ester;2-butenedioic acid (e)-, bis(2-ethylhexyl) ester;maleic acid, bis(2-ethylhexyl) ester;di-2-ethylhexyl maleate;bis(2-ethylhexyl) but-2-enedioate;2-butenedioic acid (z)-, bis(2-ethylhexyl…	NO (evaluated)	NO	2.3	NO	NO	1	FALSE	10	10	High		FALSE	202.3	51.15	YES	YES	TRUE	TRUE	181	181		JOINT	STOT RE		x			10	6	6	6	6	6	6	6	6	6	6	6		CCCCC(CC)COC(=O)C=CC(=O)OCC(CC)CCCC	C20H36O4	340.48	7.94	11.464	-3.524	0.412
420-04-2	cyanamide	NO (evaluated)	NO	2.3	NO	NO	1	FALSE	10	10	High		FALSE	202.3	51.15	YES	YES	TRUE	TRUE	181	181		JOINT	REPR-STOT RE			x	x	3	3	6	6	10	6	6	6	10	6	10	6		NC#N	CH2N2	42.04	-0.82	7.155	-7.975	0.0127
923-02-4	n-methylolmethacrylamide;2-propenamide, n-(hydroxymethyl)-2-methyl-;n-(hydroxymethyl)methacrylamide;n-(hydroxymethyl)-2-methylprop-2-enamide;n-(hydroxymethyl)-2-methylacrylamide;acrylamide, n-(hydroxymethyl)-2-methyl- (6ci,8ci);n-methylolmethacrylamide 2-propenamide, n-(hydroxymethyl)-2-methyl- n-(hydroxymethyl)methacrylamide n-(hydroxymethyl)-2-methylprop-2-enamide n-(hydroxymethyl)-2-methylacry…	NO (evaluated)	NO	2.3	NO	NO	1	FALSE	10	10	High		FALSE	202.3	51.15	YES	YES	TRUE	TRUE	181	181		JOINT	STOT RE			x	x	6	6	10	10	10	10	10	10	10	6	10	10		CC(=C)C(=O)NCO	C5H9NO2	115.13	-1.26	7.958	-9.218	0.0039
1416808-92-8	(3e)-2-chloro-3-(hydroxymethylene)cyclohexene-1-carbaldehyde	NO (evaluated)	NO	1.3	NO	NO	1	FALSE	10	10	High		FALSE	201.3	50.65	YES	YES	TRUE	TRUE	184	184		JOINT	MUTA			x	x	6	6	10	10	10	10	6	6	10	10	10	6		OC=C1CCCC(C=O)=C1Cl	C8H9ClO2	172.6	1.9	8.155	-6.255	0.345
584-84-9	toluene, 2-, diisocyanate;toluene-2,4-diisocyanate;benzene, 2,4-diisocyanato-1-methyl-;2,4-toluene diisocyanate;toluene diisocyanate (tdi);4-methyl-m-phenylene diisocyanate;2,4-diisocyanato-1-methylbenzene;4methylmphenylenediisocyanate(toluene 2,4diisocyanate);isocyanic acid, 4-methyl-m-phenylene ester;toluene 2,4-diisocyanate;2,4-diisocyanate-1-methylbenzene;toluene-2,4-diisocyanate (2,4-toluene…	YES (Step 1)	NO	6.5	NO	NO	10	TRUE	6	10	High		TRUE	201	50.5	YES	YES	TRUE	TRUE	185	185		HARMON	CARC					3	3	3	3	3	3	3	3	6	3	6	3		Cc1ccc(N=C=O)cc1N=C=O	C9H6N2O2	174.15	3.74	7.083	-3.343	0.425
100-41-4	ethylbenzene;benzene, ethyl-;ethyl benzene;ethylbenzene benzene, ethyl- ethyl benzene	NO	NO	10	NO	NO	10	TRUE	1	10	High		FALSE	201	50.5	YES	YES	TRUE	TRUE	185	185		HARMON	STOT RE					1	1	1	1	1	1	1	1	1	1	1	1		CCc1ccccc1	C8H10	106.16	3.15	4	-0.85	0.352
98-82-8	isopropylbenzene;cumene (isopropylbenzene);fenthion;cumene;benzene, (1-methylethyl)-;cumene or isopropyl benzene;propan-2-ylbenzene;isopropyl benzene;cumeme;isopropylbenzene cumene (isopropylbenzene) fenthion cumene benzene, (1-methylethyl)- cumene or isopropyl benzene propan-2-ylbenzene isopropyl benzene cumeme	NO	NO	10	NO	NO	10	TRUE	1	10	High		FALSE	201	50.5	YES	YES	TRUE	TRUE	185	185		IARC	CARC					1	1	1	1	1	1	1	1	1	1	1	1		CC(C)c1ccccc1	C9H12	120.18	3.66	4	-0.34	0.611
521284-22-0	(1r)-2-{[2-(4-aminophenyl)ethyl]amino}-1-phenylethanol hydrochloride	NO	NO	10	YES	YES	10	TRUE	10	1	High		FALSE	201	10	YES	YES	TRUE	TRUE	185	378		not classified	not applicable		x	x	x	10	10	10	10	10	10	10	10	10	10	10	10		Nc1ccc(CCNCC(O)c2ccccc2)cc1	C16H20N2O	256.33	1.32	12	-10.68	0.0431
127-18-4	tetrachloroethene;tetrachloroethylene;perchloroethylene;ethene, 1,1,2,2-tetrachloro-;1,1,2,2-tetrachloroethylene;tetrachlorethylene;ethene, tetrachloro-;perchlorethylene;tetrachloroethene (aka tetrachlorethylene);tetrachloroethylene (tce);ethylene, tetrachloro-;tetrachloroethene tetrachloroethylene perchloroethylene ethene, 1,1,2,2-tetrachloro- 1,1,2,2-tetrachloroethylene tetrachlorethylene ethen…	NO	NO	9	NO	NO	10	TRUE	3	10	High		FALSE	199	49.5	YES	YES	TRUE	TRUE	189	188		HARMON	CARC					1	1	3	3	1	3	3	1	1	1	1	1		ClC(Cl)=C(Cl)Cl	C2Cl4	165.83	3.4	4	-0.6	3.35
64741-83-9	naphtha (petroleum), heavy thermal cracked;naphtha, petroleum, heavy thermal cracked;naphtha (petroleum), thermal cracked;naphtha (petroleum), heavy thermal cracked naphtha, petroleum, heavy thermal cracked naphtha (petroleum), thermal cracked	NO	NO	9	NO	NO	10	TRUE	3	10	High		FALSE	199	49.5	YES	YES	TRUE	TRUE	189	188		HARMON	CARC-MUTA					3	3	3	3	3	3	3	3	3	3	3	3		c1cccc2ccccc12	C10H8	128.16	3.3	5.045	-1.745	4.53
64742-94-5	solvent naphtha (petroleum), heavy arom.;solvent naphtha, petroleum, heavy arom.;solvent naphtha, petroleum, heavy aromatic;solvent naphtha (petroleum), heavy arom. solvent naphtha, petroleum, heavy arom. solvent naphtha, petroleum, heavy aromatic	NO	NO	9	NO	NO	10	TRUE	3	10	High		FALSE	199	49.5	YES	YES	TRUE	TRUE	189	188		JOINT	CARC-MUTA-REPR-STOT RE					3	3	3	3	3	3	3	3	3	3	3	3		c1cccc2ccccc12	C10H8	128.16	3.3	5.045	-1.745	4.53
67-66-3	chloroform;trichloromethane;methane, trichloro-;chloroform ;chloroform trichloromethane methane, trichloro- chloroform	NO	NO	9	NO	NO	10	TRUE	3	10	High		FALSE	199	49.5	YES	YES	TRUE	TRUE	189	188		HARMON	CARC-REPR-STOT RE					1	1	1	1	1	1	1	1	3	1	3	1		ClC(Cl)Cl	CHCl3	119.38	1.97	4	-2.03	0.45
75-09-2	dichloromethane;methylene chloride;methane, dichloro-;methylene chloride [usan];methylene chloride/dichlorom;dichloromethane methylene chloride methane, dichloro- methylene chloride [usan] methylene chloride/dichlorom	NO	NO	9	NO	NO	10	TRUE	3	10	High		FALSE	199	49.5	YES	YES	TRUE	TRUE	189	188		HARMON	CARC					1	1	1	1	1	1	1	1	3	1	3	1		ClCCl	CH2Cl2	84.932	1.25	4	-2.75	0.237
77-73-6	dicyclopentadiene;4,7-methano-1h-indene, 3a,4,7,7a-tetrahydro-;3a,4,7,7a-tetrahydro-4,7-methanoindene;3a,4,7,7a-tetrahydro-1h-4,7-methanoindene;3a,4,7,7a-tetrahydro-4,7-methano-1h-indene;4,7-methanoindene, 3a,4,7,7a-tetrahydro-;dicyclopentadiene (4,7-methano-1h-indene, 3a,4,7,7a-tetrahydro-);dicyclopentadiene 4,7-methano-1h-indene, 3a,4,7,7a-tetrahydro- 3a,4,7,7a-tetrahydro-4,7-methanoindene 3a,4…	NO	NO	9	NO	NO	10	TRUE	3	10	High		FALSE	199	49.5	YES	YES	TRUE	TRUE	189	188		JOINT	REPR					1	1	1	1	1	1	3	1	1	1	1	1		C1C=CC2C1C1CC2C=C1	C10H12	132.19	3.16	4	-0.84	2.41
91-20-3	naphthalene;napthalene;naphthalene, pure;naphthalene napthalene naphthalene, pure	NO	NO	9	NO	NO	10	TRUE	3	10	High		FALSE	199	49.5	YES	YES	TRUE	TRUE	189	188		HARMON	CARC					3	3	3	3	3	3	3	3	3	3	3	3		c1cccc2ccccc12	C10H8	128.16	3.3	5.045	-1.745	4.53
98-83-9	a-methylstyrene;alpha-methylstyrene;benzene, (1-methylethenyl)-;2-phenyl-1-propene (a-methyl styrene);1-methylethenylbenzene;2-phenylpropene;prop-1-en-2-ylbenzene;styrene, .alpha.-methyl-;benzene, isopropenyl-;alpha-methylstyrol;alpha-methyl styrene;isopropenylbenzene;(alpha)-methylstyrene;a-methylstyrene alpha-methylstyrene benzene, (1-methylethenyl)- 2-phenyl-1-propene (a-methyl styrene) 1-meth…	NO	NO	9	NO	NO	10	TRUE	3	10	High		FALSE	199	49.5	YES	YES	TRUE	TRUE	189	188		IARC	CARC					1	1	1	1	1	1	3	1	1	1	1	1		CC(=C)c1ccccc1	C9H10	118.17	3.48	4.462	-0.982	0.94
104-94-9	4-methoxyaniline (p-anisidine);p-anisidine;benzenamine, 4-methoxy-;4-methoxy-phenylamine;4-methoxy-aniline;4-methoxyaniline;anisidine;4-methoxybenzenamine;4-anisidine;p-methoxyaniline	YES (Step 1)	NO	6	NO	NO	10	TRUE	6	10	High		TRUE	196	48	YES	YES	TRUE	TRUE	197	196		HARMON	STOT RE					3	6	6	6	6	6	3	3	6	6	6	6		COc1ccc(N)cc1	C7H9NO	123.15	0.95	6.519	-5.569	0.092
10591-84-1	n,n'-dimethyldiphenylthiuram disulphide;[methyl({[methyl(phenyl)carbamothioyl]disulfanyl}carbonothioyl)amino]benzene;n,n'-dimethyldiphenylthiuram disulphide [methyl({[methyl(phenyl)carbamothioyl]disulfanyl}carbonothioyl)amino]benzene	YES (Step 1)	NO	6	NO	NO	10	TRUE	6	10	High		TRUE	196	48	YES	YES	TRUE	TRUE	197	196		JOINT	STOT RE					6	6	6	6	6	6	6	6	6	6	6	6		CN(c1ccccc1)C(=S)SSC(=S)N(C)c1ccccc1	C16H16N2S4	364.56	5.97	8.191	-2.221	2.85
108-42-9	3-chloroaniline;chloroaniline, 3-;m-chloroaniline;benzenamine, 3-chloro-;3-chloro-phenylamine;3-chloro-aniline;3-chloroaniline chloroaniline, 3- m-chloroaniline benzenamine, 3-chloro- 3-chloro-phenylamine 3-chloro-aniline	YES (Step 1)	NO	6	NO	NO	10	TRUE	6	10	High		TRUE	196	48	YES	YES	TRUE	TRUE	197	196		JOINT	STOT RE					3	3	3	3	3	3	3	3	6	3	6	3		Nc1cccc(Cl)c1	C6H6ClN	127.57	1.88	6.268	-4.388	0.276
18755-43-6	dimethyl propylphosphonate;phosphonic acid, propyl-, dimethyl ester;dimethyl propylphosphonate phosphonic acid, propyl-, dimethyl ester	YES (Step 1)	NO	6	NO	NO	10	TRUE	6	10	High		TRUE	196	48	YES	YES	TRUE	TRUE	197	196		JOINT	REPR					3	3	3	3	3	3	3	3	6	3	6	3		CCCP(=O)(OC)OC	C5H13O3P	152.12	0.4	4.446	-4.046	0.0952
1879-09-0	6-tert-butyl-2,4-dimethylphenol;phenol, 2-(1,1-dimethylethyl)-4,6-dimethyl-;2-tert-butyl-4,6-dimethyl-phenol;2-(1,1-dimethylethyl)-4,6-dimethylphenol;6-tert-butyl-2,4-xylenol;2-tert-butyl-4,6-dimethylphenol;2,4-xylenol, 6-tert-butyl-;6-tert-butyl-2,4-dimethylphenol phenol, 2-(1,1-dimethylethyl)-4,6-dimethyl- 2-tert-butyl-4,6-dimethyl-phenol 2-(1,1-dimethylethyl)-4,6-dimethylphenol 6-tert-butyl-2,…	YES (Step 1)	NO	6	NO	NO	10	TRUE	6	10	High		TRUE	196	48	YES	YES	TRUE	TRUE	197	196		JOINT	STOT RE					6	6	6	6	3	6	6	6	6	6	6	6		Cc1cc(C)cc(C(C)(C)C)c1O	C12H18O	178.26	4.52	8.663	-4.143	0.442
33704-61-9	cashmeran;4h-inden-4-one, 1,2,3,5,6,7-hexahydro-1,1,2,3,3-pentamethyl-;1,2,3,5,6,7-hexahydro-1,1,2,3,3-pentamethyl-4h-inden-4-one;1,1,2,3,3-pentamethyl-1,2,3,5,6,7-hexahydro-4h-inden-4-one;4(5h)-indanone, 6,7-dihydro-1,1,2,3,3-pentamethyl-;cashmeran 4h-inden-4-one, 1,2,3,5,6,7-hexahydro-1,1,2,3,3-pentamethyl- 1,2,3,5,6,7-hexahydro-1,1,2,3,3-pentamethyl-4h-inden-4-one 1,1,2,3,3-pentamethyl-1,2,3,5…	YES (Toxicity Score of 10 confirmed)	NO	6	NO	NO	10	TRUE	6	10	Low		TRUE	196	48	YES	YES	TRUE	TRUE	197	196		OTH-YES	STOT RE					3	3	6	6	6	6	3	3	3	6	6	6		CC1C(C)(C)C2CCCC(=O)C=2C1(C)C	C14H22O	206.31	4.49	6.726	-2.236	5.15
53988-10-6	2h-benzimidazole-2-thione, 1,3-dihydro-4(or 5)-methyl-;1,3-dihydro-4(or 5)-methyl-2h-benzimidazole-2-thione;4-methyl-1,3-dihydro-2h-benzimidazole-2-thione;2h-benzimidazole-2-thione, 1,3-dihydro-4(or 5)-methyl- 1,3-dihydro-4(or 5)-methyl-2h-benzimidazole-2-thione 4-methyl-1,3-dihydro-2h-benzimidazole-2-thione	YES (Step 1)	NO	6	NO	NO	10	TRUE	6	10	High		TRUE	196	48	YES	YES	TRUE	TRUE	197	196		JOINT	REPR-STOT RE					6	6	6	6	6	6	6	6	6	6	6	6		Cc1cccc2c1N=C(S)N2	C8H8N2S	164.22	2.47	8.265	-5.795	0.13
6362-80-7	benzene, 1,1'-(1,1-dimethyl-3-methylene-1,3-propanediyl)bis-;４‐Ｍｅｔｈｙｌ‐２，４‐ｄｉｐｈｅｎｙｌ‐１‐ｐｅｎｔｅｎｅ;benzene, 1,1’-(1,1-dimethyl-3-methylene-1,3-propanediyl)bis-;1,1'-(1,1-dimethyl-3-methylene-1,3-propanediyl)bisbenzene;1,1'-(4-methylpent-1-ene-2,4-diyl)dibenzene;1-pentene, 4-methyl-2,4-diphenyl-;benzene, 1,1'-(1,1-dimethyl-3-methylene- 1,3-propanediyl)bis-;2,4-diphenyl-4-methyl-1-pentene;benzene, 1,1'-(…	YES (Step 1)	NO	6	NO	NO	10	TRUE	6	10	High		TRUE	196	48	YES	YES	TRUE	TRUE	197	196		JOINT	STOT RE					6	6	6	6	6	6	6	6	3	6	3	6		CC(C)(CC(=C)c1ccccc1)c1ccccc1	C18H20	236.34	6.51	7.986	-1.476	7.48
80-73-9	1,3-dimethyl-2-imidazolidinone;1,3-dimethylimidazolidin-2-one;2-imidazolidinone, 1,3-dimethyl-;1,3-dimethyl-2-imidazolidinone 1,3-dimethylimidazolidin-2-one 2-imidazolidinone, 1,3-dimethyl-	YES (Step 1)	NO	6	NO	NO	10	TRUE	6	10	High		TRUE	196	48	YES	YES	TRUE	TRUE	197	196		JOINT	REPR-STOT RE					3	3	6	3	6	3	3	3	6	3	6	3		CN1CCN(C)C1=O	C5H10N2O	114.14	-0.31	6.506	-6.816	0.00317
91-22-5	quinoline	YES (Step 1)	NO	6	NO	NO	10	TRUE	6	10	High		TRUE	196	48	YES	YES	TRUE	TRUE	197	196		HARMON	CARC-MUTA					3	3	3	3	3	3	3	3	6	3	6	3		c1cccc2cccnc12	C9H7N	129.15	2.03	6.196	-4.166	0.291
95-16-9	benzothiazole;1,3-benzothiazole;benzothiazole 1,3-benzothiazole	Excluded - impurity	NO	6	NO	NO	10	TRUE	6	10	Low (affected by impurity)		TRUE	196	48	YES	YES	TRUE	TRUE	197	196		JOINT	STOT RE					3	6	3	3	3	3	3	3	6	3	6	3		c1cccc2c1N=CS2	C7H5NS	135.18	2.01	6.826	-4.816	0.112
126-33-0	tetrahydrothiophene-1,1-dioxide;thiophene, tetrahydro-, 1,1-dioxide;tetramethylene sulfone;tetrahydrothiophene 1,1-dioxide;2,3,4,5-tetrahydrothiophene-1,1-dioxide;sulfolane;sulfolane (sulfone);tetrahydrothiophene-1,1-dioxide thiophene, tetrahydro-, 1,1-dioxide tetramethylene sulfone tetrahydrothiophene 1,1-dioxide 2,3,4,5-tetrahydrothiophene-1,1-dioxide sulfolane sulfolane (sulfone)	YES (Step 1)	YES	7	NO	NO	8	TRUE	6	10	High		TRUE	192	46	YES	YES	TRUE	TRUE	208	207		JOINT	REPR					1	1	3	3	3	1	3	3	6	3	6	3		O=S1(=O)CCCC1	C4H8O2S	120.17	-0.77	4	-4.77	0.0201
126-73-8	phosphoric-acid-tributyl-ester-;tributyl phosphate;phosphoric acid, tributylester;tributylphosphate;phosphoric acid tributyl ester;phosphoric acid, tributyl ester;butyl phosphate, ((buo)3po);phosphoric-acid-tributyl-ester- tributyl phosphate phosphoric acid, tributylester tributylphosphate phosphoric acid tributyl ester phosphoric acid, tributyl ester butyl phosphate, ((buo)3po)	YES (Step 1)	NO	7	NO	NO	8	TRUE	6	10	High		TRUE	192	46	YES	YES	TRUE	TRUE	208	207		HARMON	CARC					6	6	6	3	3	6	6	6	6	6	6	6		CCCCOP(=O)(OCCCC)OCCCC	C12H27O4P	266.3	4	8.239	-4.239	0.289
68516-20-1	naphtha (petroleum), steam-cracked middle arom.;naphtha, petroleum, steam-cracked middle arom.;naphtha, petroleum, steam cracked middle aromatic;naphtha (petroleum), steam-cracked middle arom. naphtha, petroleum, steam-cracked middle arom. naphtha, petroleum, steam cracked middle aromatic	NO	NO	9	NO	NO	10	TRUE	1	10	High		FALSE	191	45.5	YES	YES	TRUE	TRUE	210	209		HARMON	CARC-MUTA					1	1	1	1	1	1	1	1	1	1	1	1		CCc1ccccc1	C8H10	106.16	3.15	4	-0.85	0.352
64742-85-4	residues (petroleum), hydrodesulfurized vacuum;residues, petroleum, hydrodesulfurized vacuum;residues (petroleum), hydrodesulfurized vacuum residues, petroleum, hydrodesulfurized vacuum	NO	NO	9	NO	NO	10	TRUE	10	1	High		FALSE	191	9.5	YES	YES	TRUE	TRUE	210	380		not classified	not applicable			x		6	6	3	6	6	6	10	10	1	10	1	10		CCCCCC(CCCCC)CCCCC(CCCCC)CCCCCC(CCC)CCCC	C34H70	478.89	12	11.531	0.469	6620
85-44-9	phthalic anhydride;1,3-isobenzofurandione;2-benzofuran-1,3-dione;phthalic anhydride 1,3-isobenzofurandione 2-benzofuran-1,3-dione	NO	NO	9	NO	NO	10	TRUE	10	1	High		FALSE	191	9.5	YES	YES	TRUE	TRUE	210	380		not classified	not applicable			x	x	6	6	10	10	10	10	6	6	10	10	10	6		O=C1c2ccccc2C(=O)O1	C8H4O3	148.11	1.6	7.776	-6.176	0.513
106-46-7	1,4-dichlorobenzene;dichlorobenzene, 1,4-;dichlorobenzene, p-;benzene, 1,4-dichloro-;para-dichlorobenzene;p-dichlorobenzene;1,4dichlorobenzene;(pdichlorobenzene);benzene, p-dichloro-;1,4-dichlorobenzene (p-dichlorobenzene);1,4-dichlorobenzene (p-dichlorobenzene) (benzene, 1,4-dichloro-);1,4-dichlorobenzene dichlorobenzene, 1,4- dichlorobenzene, p- benzene, 1,4-dichloro- para-dichlorobenzene p-dic…	NO	NO	8	NO	NO	10	TRUE	3	10	High		FALSE	189	44.5	YES	YES	TRUE	TRUE	213	210		HARMON	CARC					1	1	3	3	3	3	3	3	1	1	1	1		Clc1ccc(Cl)cc1	C6H4Cl2	147	3.44	4.446	-1.006	3.44
64741-98-6	extracts (petroleum), heavy naphtha solvent;extracts, petroleum, heavy naphtha solvent;extracts (petroleum), heavy naphtha solvent extracts, petroleum, heavy naphtha solvent	NO	NO	8	NO	YES	10	TRUE	3	10	High		FALSE	189	44.5	YES	YES	TRUE	TRUE	213	210		JOINT	REPR-STOT RE					3	3	3	3	3	3	3	3	3	3	3	3		c1cccc2ccccc12	C10H8	128.16	3.3	5.045	-1.745	4.53
64742-91-2	distillates (petroleum), steam-cracked;distillates, petroleum, steam-cracked;distillates, petroleum, steam cracked;distillates (petroleum), steam-cracked distillates, petroleum, steam-cracked distillates, petroleum, steam cracked	NO	NO	8	NO	NO	10	TRUE	3	10	High		FALSE	189	44.5	YES	YES	TRUE	TRUE	213	210		JOINT	CARC-MUTA-REPR-STOT RE					3	3	3	3	3	3	3	3	3	3	3	3		c1cccc2ccccc12	C10H8	128.16	3.3	5.045	-1.745	4.53
98-88-4	benzoyl chloride	NO	NO	8	NO	NO	10	TRUE	3	10	High		FALSE	189	44.5	YES	YES	TRUE	TRUE	213	210		IARC	CARC					1	1	1	1	1	1	1	1	3	1	1	1		O=C(Cl)c1ccccc1	C7H5ClO	140.56	1.44	4	-2.56	0.07
1072-63-5	1h-imidazole, 1-ethenyl-;1-vinylimidazole;1-ethenyl-1h-imidazole;1-vinyl-1h-imidazole;1h-imidazole, 1-ethenyl- 1-vinylimidazole 1-ethenyl-1h-imidazole 1-vinyl-1h-imidazole	NO	NO	10	YES	NO	8	TRUE	3	10	High		FALSE	189	44.5	YES	YES	TRUE	TRUE	213	210		JOINT	REPR					1	1	1	1	3	1	1	3	3	3	3	3		C=CN1C=CN=C1	C5H6N2	94.111	0.96	4	-3.04	0.41
64741-82-8	distillates (petroleum), light thermal cracked;distillates, petroleum, light thermal cracked;distillates(petroleum),lightthermal cracked;distillates (petroleum), light thermal cracked distillates, petroleum, light thermal cracked distillates(petroleum),lightthermal cracked	NO	NO	10	NO	NO	8	TRUE	3	10	High		FALSE	189	44.5	YES	YES	TRUE	TRUE	213	210		HARMON	CARC					1	1	3	1	1	3	3	1	1	1	1	1		C1CCCC2CCCCC12	C10H18	138.24	4.2	4	0.2	6.93
75-02-5	vinyl fluoride;vinylfluoride;fluoroethylene;fluoroethene;ethene, fluoro-;ethylene, fluoro-;vinyl fluoride vinylfluoride fluoroethylene fluoroethene ethene, fluoro- ethylene, fluoro-	NO	NO	10	YES	YES	8	TRUE	3	10	High		FALSE	189	44.5	YES	YES	TRUE	TRUE	213	210		IARC	CARC					1	1	1	1	1	1	1	1	3	1	3	1		C=CF	C2H3F	46.042	1.19	4	-2.81	0.191
8030-30-6	naphtha	NO	NO	10	NO	NO	8	TRUE	3	10	High		FALSE	189	44.5	YES	YES	TRUE	TRUE	213	210		HARMON	CARC-MUTA					1	1	1	1	1	1	3	1	1	1	1	1		CCCCC(C)CC(C)C	C10H22	142.27	5.11	4	1.11	2.49
100-64-1	cyclohexanone oxime;cyclohexanone, oxime;n-hydroxycyclohexanimine;cyclohexanone oxime cyclohexanone, oxime n-hydroxycyclohexanimine	YES (Step 1)	NO	6	NO	NO	8	TRUE	6	10	High		TRUE	184	42	YES	YES	TRUE	TRUE	221	218		INDIV	STOT RE					3	3	3	3	3	3	3	3	6	3	6	3		ON=C1CCCCC1	C6H11NO	113.15	0.84	5.863	-5.023	0.0817
104-40-5	4-nonylphenol;nonylphenol;nonylphenol, 4-;p-n-nonylphenol (lancaster);phenol, 4-nonyl-;p-nonylphenol;para-nonylphenol (ppt);4-nonylphenol (4-np) (para-nonylphenol) (ppt)	YES (Toxicity Score of 10 confirmed)	NO	6	NO	NO	8	TRUE	6	10	Low		TRUE	184	42	YES	YES	TRUE	TRUE	221	218		OTH-YES	REPR					6	6	6	6	6	6	6	6	6	6	6	6		CCCCCCCCCc1ccc(O)cc1	C15H24O	220.34	5.76	8.617	-2.857	1.33
55066-48-3	benzenepentanol, ?-methyl-;3-methyl-5-phenylpentanol;3-methyl-5-phenylpentan-1-ol;benzenepentanol, .gamma.-methyl-;3-methyl-5-phenyl pentanol;gamma- methyl benzene pentanol;3-methyl-5-phenyl-1-pentanol;3-methyl-5-phenyl-n-pentanol;phenylhexanol;phenyxol;rose absolute pentanol;phenyl isohexanol;benzenepentanol, ?-methyl- 3-methyl-5-phenylpentanol 3-methyl-5-phenylpentan-1-ol benzenepentanol, .gamm…	YES (Step 1)	NO	6	NO	NO	8	TRUE	6	10	High		TRUE	184	42	YES	YES	TRUE	TRUE	221	218		JOINT	STOT RE					6	6	3	3	3	3	3	3	6	3	6	3		CC(CCc1ccccc1)CCO	C12H18O	178.26	3.46	7.896	-4.436	0.189
3622-84-2	benzenesulfonamide, n-butyl-;n-butylbenzenesulfonamide;n-butylbenzenesulphonamide;benzenesulfonamide, n-butyl- n-butylbenzenesulfonamide n-butylbenzenesulphonamide	YES (Step 1)	YES	4.5	NO	NO	10	TRUE	6	10	High		TRUE	181	40.5	YES	YES	TRUE	TRUE	224	221		JOINT	STOT RE					3	3	3	3	3	3	3	3	6	3	6	3		CCCCNS(=O)(=O)c1ccccc1	C10H15NO2S	213.29	2.31	6.362	-4.052	0.19
55-63-0	nitroglycerine;nitroglycerin;trinitroglycerin;1,2,3-propanetriol trinitrate;1,2,3-propanetriol, trinitrate;glycerol trinitrate;propane-1,2,3-triyl trinitrate;propane1,2,3triyltrinitrate;nitroglycerin [usan:jan];nitroglycerin ;1,2,3-propanetriol, 1,2,3-trinitrate;nitroglycerine nitroglycerin trinitroglycerin 1,2,3-propanetriol trinitrate 1,2,3-propanetriol, trinitrate glycerol trinitrate propane-1…	YES (Step 1)	NO	4.5	NO	NO	10	TRUE	6	10	High		TRUE	181	40.5	YES	YES	TRUE	TRUE	224	221		HARMON	STOT RE					6	6	3	3	3	3	3	3	6	3	6	3		O=N(=O)OCC(CON(=O)=O)ON(=O)=O	C3H5N3O9	227.08	1.62	7.071	-5.451	0.0172
4719-04-4	hexahydro-1,3,5-tris(hydroxyethyl)triazine;1,3,5-triazine-1,3,5(2h,4h,6h)-triethanol;grotan bk;2,2',2''-(hexahydro-1,3,5-triazine-1,3,5-triyl)triethanol;2,2',2''-(1,3,5-triazinane-1,3,5-triyl)triethanol;s-triazine-1,3,5(2h,4h,6h)-triethanol;triazinetriethanol;grotan (83.8);grotan;hexahydro-1,3,5-tris(hydroxyethyl)triazine 1,3,5-triazine-1,3,5(2h,4h,6h)-triethanol grotan bk 2,2',2''-(hexahydro-1,3…	NO	NO	8	NO	NO	10	TRUE	1	10	High		FALSE	181	40.5	YES	YES	TRUE	TRUE	224	221		JOINT	STOT RE					1	1	1	1	1	1	1	1	1	1	1	1		OCCN1CN(CCO)CN(CCO)C1	C9H21N3O3	219.27	-2	4.685	-6.685	2.33e-06
68603-08-7	naphtha (petroleum), arom.-contg.;naphtha, petroleum, arom.-contg.;naphtha, petroleum, aromatic containing;naphtha (petroleum), arom;naphtha, petroleum, arom-contg.;naphtha (petroleum), arom.-contg. naphtha, petroleum, arom.-contg. naphtha, petroleum, aromatic containing naphtha (petroleum), arom naphtha, petroleum, arom-contg.	NO	NO	8	NO	NO	10	TRUE	1	10	High		FALSE	181	40.5	YES	YES	TRUE	TRUE	224	221		HARMON	CARC-MUTA					1	1	1	1	1	1	1	1	1	1	1	1		CCc1ccccc1	C8H10	106.16	3.15	4	-0.85	0.352
75-35-4	1,1-dichloroethylene,;dichloroethylene,1,1-;1,1-dichloroethene;vinylidene chloride;dichloroethylene, 1,1-;ethene, 1,1-dichloro-;1,1-dichloroethylene;vinylidene dichloride;dichloroethylenes(acetylenechlorides) e.g.vinylidene chloride(1,1dichloroethylene);ethylene, 1,1-dichloro-;1,1-dichloroethene (9ci);1,1-dichloroethylene, dichloroethylene,1,1- 1,1-dichloroethene vinylidene chloride dichloroethyl…	NO	NO	8	NO	NO	10	TRUE	1	10	High		FALSE	181	40.5	YES	YES	TRUE	TRUE	224	221		HARMON	CARC					1	1	1	1	1	1	1	1	1	1	1	1		C=C(Cl)Cl	C2H2Cl2	96.942	2.13	4	-1.87	0.614
79-01-6	trichloroethene;trichloroethylene;ethene, 1,1,2-trichloro-;1,1,2-trichloroethylene;trichloroethylene (without epichlorohydrin);trichloroethylene, 1,1,2-;ethene, trichloro-;trichloroethene (aka trichloroethylene);1,1,2-trichloroethene;ethylene, trichloro-;trichloroethene trichloroethylene ethene, 1,1,2-trichloro- 1,1,2-trichloroethylene trichloroethylene (without epichlorohydrin) trichloroethylene…	NO	NO	8	NO	NO	10	TRUE	1	10	High		FALSE	181	40.5	YES	YES	TRUE	TRUE	224	221		HARMON	CARC-MUTA					1	1	1	1	1	1	1	1	1	1	1	1		ClC=C(Cl)Cl	C2HCl3	131.39	2.42	4	-1.58	1.12
106-89-8	epichlorohydrin;oxirane, 2-(chloromethyl)-;epichlorhydrin;1-chloro-2,3-epoxypropane;(chloromethyl)oxirane;(chloromethyl) oxirane;oxirane, (chloromethyl)-;2-(chloromethyl)oxirane;1chloro2,3epoxypropane (epichlorohydrin);propane, 1-chloro-2,3-epoxy-;epichlorohydrin oxirane, 2-(chloromethyl)- epichlorhydrin 1-chloro-2,3-epoxypropane (chloromethyl)oxirane (chloromethyl) oxirane oxirane, (chloromethyl…	NO	NO	9	NO	NO	8	TRUE	3	10	High		FALSE	181	40.5	YES	YES	TRUE	TRUE	224	221		HARMON	CARC					1	1	1	1	1	1	1	1	3	1	3	1		ClCC1CO1	C3H5ClO	92.521	0.45	4	-3.55	0.0683
100-42-5	styrene;benzene, ethenyl-;ethenylbenzene;styrene benzene, ethenyl- ethenylbenzene	NO	NO	10	NO	NO	8	TRUE	1	10	High		FALSE	181	40.5	YES	YES	TRUE	TRUE	224	221		HARMON	REPR-STOT RE					1	1	1	1	1	1	1	1	1	1	1	1		C=Cc1ccccc1	C8H8	104.14	2.95	4	-1.05	0.501
75-28-5	2-methylpropane;isobutane;propane, 2-methyl-;isobutane,ifitcontains ?0,1%w/w butadiene;2-methylpropane isobutane propane, 2-methyl- isobutane,ifitcontains ?0,1%w/w butadiene	NO	NO	10	NO	NO	8	TRUE	1	10	Low (affected by impurity)		FALSE	181	40.5	YES	YES	TRUE	TRUE	224	221		HARMON	CARC-MUTA					1	1	1	1	1	1	1	1	1	1	1	1		CC(C)C	C4H10	58.119	2.76	4	-1.24	0.508
8013-07-8	soybean oil, epoxidized;epoxidized soybean oil;fatty acid, soybean oil, epoxidized;soybean oil, epoxidized epoxidized soybean oil fatty acid, soybean oil, epoxidized	NO	NO	8	NO	NO	10	TRUE	10	1	High		FALSE	181	9	YES	YES	TRUE	TRUE	224	403		not classified	not applicable			x		6	6	3	3	3	3	6	6	1	10	1	10		CCCCCC1C(CC2C(CCCCCCCC(=O)OCC(COC(=O)CCCCCCCC3C(CC4C(CCCCC)O4)O3)OC(=O)CCCCCCCC3C(CC4C(CCCCC)O4)O3)O2)O1	C57H98O12	975.33	12	12	0	0.815
10543-57-4	n,n'-ethylenebis[n-acetylacetamide];n,n'-ethane-1,2-diylbis(n-acetylacetamide);acetamide, n,n'-1,2-ethanediylbis[n-acetyl-;acetamide, n,n'-1,2-ethanediylbis n-acetyl-;acetamide, n,n'-1,2-ethanediylbis(n-acetyl-;diacetamide, n,n'-ethylenebis-;n,n'-1,2-ethanediylbis n-acetylacetamide;n,n'-ethylenebis[n-acetylacetamide] n,n'-ethane-1,2-diylbis(n-acetylacetamide) acetamide, n,n'-1,2-ethanediylbis[n-a…	NO	NO	8	NO	NO	10	TRUE	10	1	High		FALSE	181	9	YES	YES	TRUE	TRUE	224	403		not classified	not applicable		x	x	x	10	10	10	10	10	10	10	10	10	10	10	10		CC(=O)N(CCN(C(C)=O)C(C)=O)C(C)=O	C10H16N2O4	228.24	-2	11.771	-13.771	0.0152
120-78-5	2,2'-dibenzothiazolyl disulfide;2,2'-dithiobisbenzothiazole;benzothiazole, 2,2'-dithiobis-;benzothiazyl disulfide;benzothiazole, 2,2 -dithiobis-;benzothiazole, 2,2’-dithiobis-;di(benzothiazol-2-yl) disulphide;2,2'-disulfanediylbis(1,3-benzothiazole);altax;2,2'-dibenzothiazolyl disulfide 2,2'-dithiobisbenzothiazole benzothiazole, 2,2'-dithiobis- benzothiazyl disulfide benzothiazole, 2,2 -dithiobis…	NO	NO	8	NO	NO	10	TRUE	10	1	High		FALSE	181	9	YES	YES	TRUE	TRUE	224	403		not classified	not applicable		x	x	x	10	10	10	10	10	10	10	10	10	6	10	6		c1cccc2c1N=C(SSC1=Nc3ccccc3S1)S2	C14H8N2S4	332.47	4.66	12	-7.34	0.137
123-77-3	1,2-diazenedicarboxamide;azodicarbonamide;diazenedicarboxamide;azodicarboxamide;c,c'-azodi(formamide);(e)-diazene-1,2-dicarboxamide;formamide, 1,1'-azobis-;diazene-1,2-dicarboxamide;1,1'-azobisformamide;azodicarbonamide (diazenedicarboxamide);1,2-diazenedicarboxamide azodicarbonamide diazenedicarboxamide azodicarboxamide c,c'-azodi(formamide) (e)-diazene-1,2-dicarboxamide formamide, 1,1'-azobis- …	NO	NO	8	NO	NO	10	TRUE	10	1	High		FALSE	181	9	YES	YES	TRUE	TRUE	224	403		not classified	not applicable			x	x	3	3	6	6	10	6	6	6	10	1	10	3		NC(=O)N=NC(N)=O	C2H4N4O2	116.08	-1.7	8.775	-10.475	1.36e-05
2082-79-3	benzenepropanoic acid, 3,5-bis(1,1-dimethylethyl)-4-hydroxy-, octadecyl ester;octadecyl 3-(3,5-di-tert-butyl-4-hydroxyphenyl)propionate;octadecyl 3-(3,5-di-tert-butyl-4-hydroxyphenyl)propanoate;hydrocinnamic acid, 3,5-di-tert-butyl-4-hydroxy-, octadecyl ester;benzenepropanoic acid, 3,5-bis(1,1-dimethylethyl)-4-hydroxy-, octadecyl ester octadecyl 3-(3,5-di-tert-butyl-4-hydroxyphenyl)propionate oct…	NO	NO	8	NO	NO	10	TRUE	10	1	High		FALSE	181	9	YES	YES	TRUE	TRUE	224	403		not classified	not applicable			x		6	6	3	6	6	6	10	10	1	10	3	10		CCCCCCCCCCCCCCCCCCOC(=O)CCc1cc(C(C)(C)C)c(O)c(C(C)(C)C)c1	C35H62O3	530.84	12	12	0	33.5
31570-04-4	phenol, 2,4-bis(1,1-dimethylethyl)-, phosphite (3:1);tris(2,4-ditert-butylphenyl) phosphite;tris(2,4-di-tert-butylphenyl) phosphite;phenol, 2,4-di-tert-butyl-, phosphite (3:1);tris(2,4-di-tert-butylphenyl)phosphite;irgafos 168;tk 11682;phenol, 2,4-bis(1,1-dimethylethyl)-, phosphite (3:1) tris(2,4-ditert-butylphenyl) phosphite tris(2,4-di-tert-butylphenyl) phosphite phenol, 2,4-di-tert-butyl-, pho…	NO	NO	8	NO	NO	10	TRUE	10	1	High		FALSE	181	9	YES	YES	TRUE	TRUE	224	403		not classified	not applicable		x	x		10	10	6	6	6	6	10	10	3	10	3	10		CC(C)(C)c1ccc(OP(Oc2ccc(C(C)(C)C)cc2C(C)(C)C)Oc2ccc(C(C)(C)C)cc2C(C)(C)C)c(C(C)(C)C)c1	C42H63O3P	646.89	12	12	0	1250000
36878-20-3	benzenamine, ar-nonyl-n-(nonylphenyl)-;bis(nonylphenyl)amine;2-nonyl-n-(2-nonylphenyl)aniline;benzenamine, ar-nonyl-n-(nonylphenyl)- bis(nonylphenyl)amine 2-nonyl-n-(2-nonylphenyl)aniline	NO	NO	8	NO	NO	10	TRUE	10	1	High		FALSE	181	9	YES	YES	TRUE	TRUE	224	403		not classified	not applicable		x	x		10	6	3	6	6	6	10	10	3	10	3	10		CCCCCCCCCc1ccccc1Nc1ccccc1CCCCCCCCC	C30H47N	421.68	12	12	0	514
6104-30-9	urea, n,n''-(2-methylpropylidene)bis-;urea,n,n''-(2-methylpropylidene)bis;urea, n,n’’-(2-methylpropylidene)bis-;n,n''-(isobutylidene)diurea;n,n''-(2-methylpropane-1,1-diyl)diurea;urea, 1,1'-isobutylidenedi-;urea, n,n''-(2-methylpropylidene)bis- urea,n,n''-(2-methylpropylidene)bis urea, n,n’’-(2-methylpropylidene)bis- n,n''-(isobutylidene)diurea n,n''-(2-methylpropane-1,1-diyl)diurea urea, 1,1'-is…	NO	NO	8	NO	NO	10	TRUE	10	1	High		FALSE	181	9	YES	YES	TRUE	TRUE	224	403		not classified	not applicable		x	x	x	6	10	10	10	10	10	10	10	10	6	10	10		CC(C)C(NC(N)=O)NC(N)=O	C6H14N4O2	174.2	-1.68	12	-13.68	1.25e-05
6358-85-6	pigment yellow-12;butanamide, 2,2'-[(3,3'-dichloro[1,1'-biphenyl]-4,4'-diyl)bis(2,1-diazenediyl)]bis[3-oxo-n-phenyl-;c.i. pigment yellow 12;butanamide, 2,2'- (3,3'-dichloro 1,1'-biphenyl -4,4'-diyl)bis(azo) bis 3-oxo-n-phenyl-;butanamide, 2,2’-[(3,3’-dichloro[1,1’-biphenyl]-4,4’-diyl)bis(azo)]bis[3-oxo-n-phenyl-;2,2'-[(3,3'-dichloro[1,1'-biphenyl]-4,4'-diyl)bis(azo)]bis[3-oxo-n-phenylbutyramide];…	NO	NO	8	NO	NO	10	TRUE	10	1	High		FALSE	181	9	YES	YES	TRUE	TRUE	224	403		not classified	not applicable		x		x	10	10	10	10	10	10	6	6	6	6	6	6		CC(=O)C(C(=O)Nc1ccccc1)N=Nc1ccc(-c2ccc(N=NC(C(C)=O)C(=O)Nc3ccccc3)c(Cl)c2)cc1Cl	C32H26Cl2N6O4	629.47	7.05	12	-4.95	0.139
64742-42-3	hydrocarbon waxes (petroleum), clay-treated microcryst.;hydrocarbon waxes, petroleum, clay-treated microcryst.;hydrocarbon waxes, petroleum, clay treated microcrystaline;hydrocarbon waxes (petroleum), clay-treated microcryst. hydrocarbon waxes, petroleum, clay-treated microcryst. hydrocarbon waxes, petroleum, clay treated microcrystaline	NO (Toxicity Score of 1 confirmed)	NO	8	NO	NO	10	TRUE	10	1	Low		FALSE	181	9	YES	YES	TRUE	TRUE	224	403		OTH-NO	STOT RE			x		3	3	6	6	6	6	10	10	1	10	1	10		CCCCCCC(CCCCC)CCC(CCC)CCC(CCC)CCC	C27H56	380.71	12	8.952	3.048	601
6683-19-8	benzenepropanoic acid, 3,5-bis(1,1-dimethylethyl)-4-hydroxy-, 1,1'-[2,2-bis[[3-[3,5-bis(1,1-dimethylethyl)-4-hydroxyphenyl]-1-oxopropoxy]methyl]-1,3-propanediyl] ester;irganox 1010;benzenepropanoic acid, 3,5-bis(1,1-dimethylethyl)-4-hydroxy-, 2,2-bis[[3-[3,5-bis(1,1-dimethylethyl)-4-hydroxyphenyl]-1-oxopropoxy]methyl]-1,3-propanediyl ester;pentaerythritol tetrakis(3-(3,5-di-tert-butyl-4-hydroxyph…	NO (Toxicity Score of 1 confirmed)	NO	8	NO	NO	10	TRUE	10	1	Low		FALSE	181	9	YES	YES	TRUE	TRUE	224	403		OTH-NO	CARC			x	x	6	6	6	10	10	10	6	6	10	1	10	1		CC(C)(C)c1cc(CCC(=O)OCC(COC(=O)CCc2cc(C(C)(C)C)c(O)c(C(C)(C)C)c2)(COC(=O)CCc2cc(C(C)(C)C)c(O)c(C(C)(C)C)c2)COC(=O)CCc2cc(C(C)(C)C)c(O)c(C(C)(C)C)c2)cc(C(C)(C)C)c1O	C73H108O12	1177.6	1.36	12	-10.64	1.27e-06
793-24-8	n-(1,3-dimethylbutyl)-n'-phenyl-p-phenylenediamine;1,4-benzenediamine, n1-(1,3-dimethylbutyl)-n4-phenyl-;n-(1,3-dimethylbutyl)-n´-phenyl-1,4-phenylenediamine;1,4-benzenediamine, n-(1,3-dimethylbutyl)-n'-phenyl-;1,4-benzenediamine, n-(1,3-dimethylbutyl)-n’-phenyl-;n-1,3-dimethylbutyl-n'-phenyl-p-phenylenediamine;n-(4-methylpentan-2-yl)-n'-phenylbenzene-1,4-diamine;p-phenylenediamine, n-(1,3-dimeth…	NO (Toxicity Score of 1 confirmed)	NO	8	NO	NO	10	TRUE	10	1	Low		FALSE	181	9	YES	YES	TRUE	TRUE	224	403		OTH-NO	STOT RE		x	x	x	10	10	10	10	10	10	10	10	10	10	10	10		CC(C)CC(C)Nc1ccc(Nc2ccccc2)cc1	C18H24N2	268.38	4.68	11.542	-6.862	0.893
8050-26-8	resin acids and rosin acids, esters with pentaerythritol;pentaerythritol rosinate;ester of rosin with pentaerythritol, consisting of mainly tetra-esters and tri-esters, as the reactor is charged with a 4:1 stoichiometric ratio of reactants (rosin and pentaerythritol), and reacted until a low ‘acid value’ is achieved, indicating that most of the –cooh groups of the parent rosin have been esterifie…	NO	NO	8	NO	NO	10	TRUE	10	1	High		FALSE	181	9	YES	YES	TRUE	TRUE	224	403		not classified	not applicable		x	x	x	10	10	10	10	10	10	10	10	10	6	10	6		CC(C)C1CCC2C(C=1)=CCC1C2(C)CCCC1(C)C(=O)OCC(CO)(CO)CO	C25H40O5	420.56	5.61	12	-6.39	0.401
8050-31-5	resin acids and rosin acids, esters with glycerol;foral 85;esters of rosin with glycerol;glycerol ester of rosin;rosin, esters with glycerol;resin acids and rosin acids, esters with glycerol foral 85 esters of rosin with glycerol glycerol ester of rosin rosin, esters with glycerol	NO	NO	8	NO	NO	10	TRUE	10	1	High		FALSE	181	9	YES	YES	TRUE	TRUE	224	403		not classified	not applicable		x	x	x	10	10	10	10	10	10	10	10	10	6	10	6		CC(C)C1CCC2C(C=1)=CCC1C2(C)CCCC1(C)C(=O)OCC(O)CO	C23H36O4	376.51	5.13	11.811	-6.681	0.488
84852-53-9	1,1'-(ethane-1,2-diyl)bis[pentabromobenzene];1,1'-ethane-1,2-diylbis(pentabromobenzene);1,2-bis(pentabromophenyl) ethane;decabromodiphenyl ethane;ethane 1,2-bis(pentabromophenyl);ethylene bis(pentabromophenyl);dbdpethane;ebp;1,1'-(ethane-1,2-diyl)bis[pentabromobenzene] 1,1'-ethane-1,2-diylbis(pentabromobenzene) 1,2-bis(pentabromophenyl) ethane decabromodiphenyl ethane ethane 1,2-bis(pentabromophe…	NO	NO	8	NO	NO	10	TRUE	10	1	High		FALSE	181	9	YES	YES	TRUE	TRUE	224	403		not classified	not applicable		x	x		10	10	6	6	6	6	10	10	3	10	3	10		Brc1c(CCc2c(Br)c(Br)c(Br)c(Br)c2Br)c(Br)c(Br)c(Br)c1Br	C14H4Br10	971.27	12	12	0	903
95-31-8	2-benzothiazolesulfenamide, n-(1,1-dimethylethyl)-;n-tert-butyl-2-benzothiazolesulfenamide;n-tert-butylbenzothiazole-2-sulphenamide;n-(1,3-benzothiazol-2-ylsulfanyl)-2-methylpropan-2-amine;2-benzothiazolesulfenamide, n-tert-butyl-;2-benzothiazolesulfenamide, n-(1,1-dimethylethyl)- n-tert-butyl-2-benzothiazolesulfenamide n-tert-butylbenzothiazole-2-sulphenamide n-(1,3-benzothiazol-2-ylsulfanyl)-2-…	NO	NO	8	NO	NO	10	TRUE	10	1	High		FALSE	181	9	YES	YES	TRUE	TRUE	224	403		not classified	not applicable		x	x	x	10	10	10	10	10	10	10	10	10	10	10	10		CC(C)(C)NSC1=Nc2ccccc2S1	C11H14N2S2	238.36	4.67	12	-7.33	0.59
95-33-0	n-cyclohexyl-2-benzothiazylsulfenamide;2-benzothiazolesulfenamide, n-cyclohexyl-;n-cyclohexyl-2-benzothiazole sulfenamide;n-cyclohexyl-2-benzothiazolesulfenamide;n-cyclohexylbenzothiazole-2-sulfenamide;n-(1,3-benzothiazol-2-ylsulfanyl)cyclohexanamine;n-cyclohexyl-2-benzothiazylsulfenamide 2-benzothiazolesulfenamide, n-cyclohexyl- n-cyclohexyl-2-benzothiazole sulfenamide n-cyclohexyl-2-benzothiazo…	NO	NO	8	NO	NO	10	TRUE	10	1	High		FALSE	181	9	YES	YES	TRUE	TRUE	224	403		not classified	not applicable		x	x	x	10	10	10	10	10	10	10	10	10	10	10	10		C1CCCCC1NSC1=Nc2ccccc2S1	C13H16N2S2	264.4	3.47	11.04	-7.57	0.247
108-74-7	1,3,5-triazine, hexahydro-1,3,5-trimethyl-;hexahydro-1,3,5-trimethyl-1,3,5-triazine;1,3,5-trimethyl-1,3,5-triazinane;s-triazine, hexahydro-1,3,5-trimethyl-;1,3,5-triazine, hexahydro-1,3,5-trimethyl- hexahydro-1,3,5-trimethyl-1,3,5-triazine 1,3,5-trimethyl-1,3,5-triazinane s-triazine, hexahydro-1,3,5-trimethyl-	NO	NO	7	NO	NO	10	TRUE	3	10	High		FALSE	179	39.5	YES	YES	TRUE	TRUE	250	230		JOINT	STOT RE					1	1	1	1	1	1	1	1	3	1	3	1		CN1CN(C)CN(C)C1	C6H15N3	129.2	-2	4	-6	0.00014
119-64-2	tetrahydronaphthalene;tetralin;naphthalene, 1,2,3,4-tetrahydro-;1,2,3,4-tetrahydronaphthalene;tetranap;5,6,7,8-tetrahydronaphthalene;benzocyclohexane;tetralin (r);1,2,3,4-tetrahydronaphthalene (tetralin);tetrahydronaphthalene tetralin naphthalene, 1,2,3,4-tetrahydro- 1,2,3,4-tetrahydronaphthalene tetranap 5,6,7,8-tetrahydronaphthalene benzocyclohexane tetralin (r) 1,2,3,4-tetrahydronaphthalene (t…	NO	NO	7	NO	NO	10	TRUE	3	10	High		FALSE	179	39.5	YES	YES	TRUE	TRUE	250	230		INDIV	CARC					1	3	3	3	3	3	3	1	1	1	1	1		C1CCCc2ccccc12	C10H12	132.19	3.49	4.745	-1.255	1.61
541-73-1	1,3-dichlorobenzene;dichlorobenzene, 1,3-;1,3-di-chlorobenzene;benzene, 1,3-dichloro-;m-dichlorobenzene;3-dichlorobenzene;benzene, m-dichloro-;1,3-dichlorobenzene (m-dichlorobenzene)	NO	NO	7	NO	YES	10	TRUE	3	1	Low (not checked)		FALSE	80	3.95	YES	YES	TRUE	TRUE	1471	1458		OTH-YES	STOT RE					1	3	3	3	3	3	3	3	1	1	1	1		Clc1cccc(Cl)c1	C6H4Cl2	147	3.53	4.499	-0.969	3.67
78-87-5	propane, 1,2-dichloro-;1,2-dichloropropane;dichloropropane, 1,2-;propylene dichloride; 1,2-dichloro-propane ;propylene dichloride pdc dichloropropane dcp;propane, 1,2-dichloro- 1,2-dichloropropane dichloropropane, 1,2- propylene dichloride 1,2-dichloro-propane propylene dichloride pdc dichloropropane dcp	NO	NO	7	NO	NO	10	TRUE	3	10	High		FALSE	179	39.5	YES	YES	TRUE	TRUE	250	230		HARMON	CARC					1	1	1	1	1	1	1	1	3	1	1	1		CC(Cl)CCl	C3H6Cl2	112.98	1.98	4	-2.02	0.381
95-49-8	2-chlorotoluene;chlorotoluene, 2-;o-chlorotoluene;benzene, 1-chloro-2-methyl-;chlorotoluene, o-;1-chloro-2-methylbenzene;toluene, o-chloro-;2-chlorotoluene (o-chlorotoluene);2-chlorotoluene chlorotoluene, 2- o-chlorotoluene benzene, 1-chloro-2-methyl- chlorotoluene, o- 1-chloro-2-methylbenzene toluene, o-chloro- 2-chlorotoluene (o-chlorotoluene)	NO	NO	7	NO	NO	10	TRUE	3	10	High		FALSE	179	39.5	YES	YES	TRUE	TRUE	250	230		JOINT	REPR					1	1	3	3	1	3	3	1	1	1	1	1		Cc1ccccc1Cl	C7H7Cl	126.58	3.42	4.256	-0.836	1.98
2210-79-9	0-cresyl glycidyl ether;oxirane, ((2-methylphenoxy)methyl)-;oxirane, [(2-methylphenoxy)methyl]-;2,3-epoxypropyl o-tolyl ether;2-[(2-methylphenoxy)methyl]oxirane;2,3epoxypropylotolyl ether;oxirane, (2-methylphenoxy)methyl -;oxirane, (2-methylphenoxy)methyl -;propane, 1,2-epoxy-3-(o-tolyloxy)-;oxirane, Х(2-methylphenoxy)methylе-;o-cresyl glycidyl ether;glycidyl o-tolyl ether;0-cresyl glycidyl ether…	YES (Step 1)	NO	7	NO	NO	6	TRUE	6	10	High		TRUE	178	39	YES	YES	TRUE	TRUE	254	234		JOINT	MUTA					3	6	6	3	3	3	3	3	6	3	6	3		Cc1ccccc1OCC1CO1	C10H12O2	164.19	2.16	6.667	-4.507	0.299
23949-66-8	ethanediamide, n-(2-ethoxyphenyl)-n’-(2-ethylphenyl)-;n-(2-ethoxyphenyl)-n'-(2-ethylphenyl)oxamide;n-(2-ethoxyphenyl)-n'-(2-ethylphenyl)ethanediamide;ethanediamide, n-(2-ethoxyphenyl)-n'-(2-ethylphenyl)-;oxanilide, 2'-ethoxy-2''-ethyl-;ethanediamide, n-(2-ethoxyphenyl)-n’-(2-ethylphenyl)- n-(2-ethoxyphenyl)-n'-(2-ethylphenyl)oxamide n-(2-ethoxyphenyl)-n'-(2-ethylphenyl)ethanediamide ethanediamide…	NO	NO	7.5	YES	NO	10	TRUE	10	1	High		FALSE	176	8.75	YES	YES	TRUE	TRUE	255	425		not classified	not applicable		x	x	x	10	10	10	10	10	10	10	10	10	10	10	10		CCc1ccccc1NC(=O)C(=O)Nc1ccccc1OCC	C18H20N2O3	312.35	3.69	12	-8.31	0.147
27955-94-8	tris(hydroxyphenyl)ethane;1,1,1-tris(4-hydroxyphenyl)ethane;phenol, 4,4',4''-ethylidynetris-;4,4’,4 -ethane-1,1,1-triyltriphenol;4,4',4''-(ethan-1,1,1-triyl)triphenol;phenol, 4,4',4''-ethylidynetri-;4, 4',4''-(ethan-1,1,1-triyl)triphenol;4,4',4 -ethane-1,1,1-triyltriphenol;tris(hydroxyphenyl)ethane 1,1,1-tris(4-hydroxyphenyl)ethane phenol, 4,4',4''-ethylidynetris- 4,4’,4 -ethane-1,1,1-triyltriphe…	NO	NO	7.5	YES	YES	10	TRUE	10	1	High		FALSE	176	8.75	YES	YES	TRUE	TRUE	255	425		not classified	not applicable		x	x	x	10	10	10	10	10	10	10	10	10	10	10	10		CC(c1ccc(O)cc1)(c1ccc(O)cc1)c1ccc(O)cc1	C20H18O3	306.34	4.38	12	-7.62	0.292
932742-30-8	3-((5-(3-(dodecanoyloxy)-2,2-dimethylpropylideneamino)-1,3,3-trimethylcyclohexyl)methylimino)-2,2-dimethylpropyl dodecanoate;sika hÄrter li;aldimine 1;sika hardener li	NO	NO	7.5	YES	NO	10	TRUE	10	1	High		FALSE	176	8.75	YES	YES	TRUE	TRUE	255	425		not classified	not applicable			x		6	6	6	6	6	6	10	10	3	10	3	10		CCCCCCCCCCCC(=O)OCC(C)(C)C=NCC1(C)CC(N=CC(C)(C)COC(=O)CCCCCCCCCCC)CC(C)(C)C1	C44H82N2O4	703.1	12	12	0	81.6
108-31-6	maleic anhydride;2,5-furandione;malic anhydride;furan-2,5-dione;malic anhydride††;maleic anhydride 2,5-furandione malic anhydride furan-2,5-dione malic anhydride††	NO	NO	6.5	NO	NO	10	TRUE	3	10	High		FALSE	174	37	YES	YES	TRUE	TRUE	258	235		JOINT	STOT RE					3	3	1	1	1	1	1	1	3	3	3	3		O=C1C=CC(=O)O1	C4H2O3	98.053	1.62	5.414	-3.794	0.0807
137-26-8	thiram;thioperoxydicarbonic diamide ([(h2n)c(s)]2s2), n,n,n',n'-tetramethyl-;tetramethylthiuram disulfide;thioperoxydicarbonic diamide ([(h2n)c(s)]2s2), tetramethyl-;tetramethylthiuram (thiuram;tmtd);tetramethylthiuramdisulfide;[disulfanediylbis(carbonothioylnitrilo)]tetramethane;disulfiram(inn);thiram(inn);tetramethylthioperoxydicarbonicdiamide;thioperoxydicarbonic diamide, tetramethyl-;disulfid…	YES (Step 1)	NO	3.75	NO	NO	10	TRUE	6	10	High		TRUE	173.5	36.75	YES	YES	TRUE	TRUE	259	236		HARMON	STOT RE					6	6	6	6	6	6	3	6	6	6	6	6		CN(C)C(=S)SSC(=S)N(C)C	C6H12N2S4	240.42	1.73	6.858	-5.128	0.228
80-15-9	cumene hydroperoxide;hydroperoxide, 1-methyl-1-phenylethyl;2-phenyl-prop-2-yl-hydroperoxide;1-methyl-1-phenylethyl hydroperoxide;±,±-dimethylbenzyl hydroperoxide;2-phenylpropan-2-yl hydroperoxide;?,?-dimethylbenzyl hydroperoxide;hydroperoxide, .alpha.,.alpha.-dimethylbenzyl;hydroperoxide;α,α-dimethylbenzyl hydroperoxide;cumene hydroperoxide (hydroperoxide, 1-methyl-1-phenylethyl);hydroperoxide, a…	YES (Step 1)	NO	3.75	NO	NO	10	TRUE	6	10	High		TRUE	173.5	36.75	YES	YES	TRUE	TRUE	259	236		HARMON	STOT RE					6	6	6	6	6	6	6	6	6	6	6	6		CC(C)(c1ccccc1)OO	C9H12O2	152.18	2.16	7.875	-5.715	0.169
68526-56-7	alkenes, c9-11, c10-rich;alkenes, c9-11, c10 rich;alkenes, c9-11, c10-rich alkenes, c9-11, c10 rich	NO	NO	8	NO	NO	8	TRUE	3	10	High		FALSE	173	36.5	YES	YES	TRUE	TRUE	261	238		JOINT	CARC-MUTA-REPR-STOT RE					1	1	1	1	1	1	3	1	1	1	1	1		CCC=CCCC=CC=C	C10H16	136.23	4.69	4	0.69	3.96
68513-03-1	naphtha (petroleum), light catalytic reformed, arom.-free;naphtha, petroleum, light catalytic reformed, arom.-free;naphtha, petroleum, light catalytic reformed, arom-free;naphtha (petroleum), light catalytic reformed, arom.-free naphtha, petroleum, light catalytic reformed, arom.-free naphtha, petroleum, light catalytic reformed, arom-free	NO	NO	9	NO	NO	8	TRUE	1	10	High		FALSE	173	36.5	YES	YES	TRUE	TRUE	261	238		HARMON	CARC-MUTA					1	1	1	1	1	1	1	1	1	1	1	1		CCC(C)C	C5H12	72.145	2.72	4	-1.28	0.482
68783-11-9	naphtha (petroleum), light polymn.;naphtha, petroleum, light polymn.;naphtha, petroleum, light polymerization;naphta, polymerization, light;naphtha (petroleum), light polymn. naphtha, petroleum, light polymn. naphtha, petroleum, light polymerization naphta, polymerization, light	NO	NO	9	NO	NO	8	TRUE	1	10	High		FALSE	173	36.5	YES	YES	TRUE	TRUE	261	238		JOINT	CARC-MUTA-REPR					1	1	1	1	1	1	1	1	1	1	1	1		CCC(C)C	C5H12	72.145	2.72	4	-1.28	0.482
75-15-0	carbon;carbon disulfide;carbon disulphide;methanedithione;carbondisulphide;carbon carbon disulfide carbon disulphide methanedithione carbondisulphide	NO	NO	9	NO	NO	8	TRUE	1	10	High		FALSE	173	36.5	YES	YES	TRUE	TRUE	261	238		HARMON	REPR-STOT RE					1	1	1	1	1	1	1	1	1	1	1	1		S=C=S	CS2	76.138	1.94	4	-2.06	0.0731
8006-61-9	gasoline, natural;gasoline;gasoline, natural gasoline	NO	NO	9	NO	NO	8	TRUE	1	10	High		FALSE	173	36.5	YES	YES	TRUE	TRUE	261	238		HARMON	CARC-MUTA					1	1	1	1	1	1	1	1	1	1	1	1		CCC(C)C	C5H12	72.145	2.72	4	-1.28	0.482
18127-01-0	4-tert-butyldihydrocinnamicaldehyde;benzenepropanal, 4-(1,1-dimethylethyl)-;3-(4-tert-butylphenyl)propionaldehyde;3-(4-tert-butylphenyl)propanal;hydrocinnamaldehyde, p-tert-butyl-;bourgeonal;p-t-butyl-dihydrocinnamaldehyde (bourgenol);4-(1,1-dimethylethyl)-benzenepropanal;4-tert-butyldihydrocinnamicaldehyde benzenepropanal, 4-(1,1-dimethylethyl)- 3-(4-tert-butylphenyl)propionaldehyde 3-(4-tert-bu…	YES (Step 1)	NO	6	NO	NO	6	TRUE	6	10	High		TRUE	172	36	YES	YES	TRUE	TRUE	266	243		JOINT	REPR-STOT RE					3	6	6	6	6	6	3	3	6	6	6	6		CC(C)(C)c1ccc(CCC=O)cc1	C13H18O	190.27	3.94	7.054	-3.114	2.36
80-54-6	4-(1,1-dimethylethyl)-.alpha.-methylbenzenepropanal;benzenepropanal, 4-(1,1-dimethylethyl)-.alpha.-methyl-;lilial (p-t-butyl-alpha-methylhydrocinnamaldehyde [80-54-6]);lillial;benzenepropanal, 4-(1,1-dimethylethyl)-?-methyl-;2-(4-tert-butylbenzyl)propionaldehyde;3-(4-tert-butylphenyl)-2-methylpropanal;hydrocinnamaldehyde, p-tert-butyl-.alpha.-methyl-;nutylphenol)propanal;4-tert-butyl-a-methylhydr…	YES (Step 1)	NO	6	NO	NO	6	TRUE	6	10	High		TRUE	172	36	YES	YES	TRUE	TRUE	266	243		JOINT	REPR					6	6	6	6	6	6	6	6	6	6	6	6		CC(Cc1ccc(C(C)(C)C)cc1)C=O	C14H20O	204.3	4.36	7.352	-2.992	3.13
115-96-8	tris( 2-chloroethyl) phosphate;tri-2-chloroethyl phosphate;ethanol, 2-chloro-, phosphate (3:1);tris(chloroethyl) phosphate;tris(2-chloroethyl)phosphate;tris (2-chloroethyl) phosphate;tris(2-chloroethyl) phosphate;tris-(2-chloroethyl) phosphate;phosphate;tris(2chloroethyl) phosphate;tris(beta-chloroethylphosphate);2-chloroethanol phosphate (3:1);tris( 2-chloroethyl) phosphate tri-2-chloroethyl pho…	YES (Step 1)	NO	3.5	NO	NO	10	TRUE	6	10	High		TRUE	171	35.5	YES	YES	TRUE	TRUE	268	245		HARMON	CARC-REPR					3	3	3	3	3	3	3	3	6	3	6	3		O=P(OCCCl)(OCCCl)OCCCl	C6H12Cl3O4P	285.48	1.44	5.311	-3.871	0.0628
61617-00-3	2h-benzimidazole-2-thione, 1,3-dihydro-4(or 5)-methyl-, zinc salt (2:1)	YES (Step 1)	NO	3.5	NO	NO	10	TRUE	6	10	High		TRUE	171	35.5	YES	YES	TRUE	TRUE	268	245		JOINT	REPR-STOT RE					3	6	6	3	3	3	3	3	6	3	6	3		Cc1ccc2c(c1)NC(=S)N2	C8H8N2S	164.22	2	7.006	-5.006	0.105
66-27-3	methyl methanesulfonate;methyl methane sulfonate (mms);methyl methane sulfonate;methyl methanesulphonate;methanesulfonic acid, methyl ester;methanesulfonic acid methyl ester;methylmethanesulfonate;methyl methanesulfonate (mms)	YES (Step 1)	NO	3.5	NO	NO	10	TRUE	6	10	High		TRUE	171	35.5	YES	YES	TRUE	TRUE	268	245		IARC	CARC					1	1	3	3	3	1	3	3	6	3	6	3		COS(C)(=O)=O	C2H6O3S	110.13	-0.66	4	-4.66	0.0294
693-21-0	2,2'-oxybisethanol, dinitrate;diethyleneglycol dinitrate;diethylene diglycol, dinitrate;oxydiethylene dinitrate;ethanol, 2,2'-oxybis-, dinitrate;oxydiethane-2,1-diyl dinitrate;diethylene glycol, dinitrate;2,2'-oxybisethanol, dinitrate diethyleneglycol dinitrate diethylene diglycol, dinitrate oxydiethylene dinitrate ethanol, 2,2'-oxybis-, dinitrate oxydiethane-2,1-diyl dinitrate diethylene glycol,…	YES (Step 1)	NO	3.5	NO	NO	10	TRUE	6	10	High		TRUE	171	35.5	YES	YES	TRUE	TRUE	268	245		HARMON	STOT RE					3	3	3	3	3	3	3	3	6	3	6	3		O=N(=O)OCCOCCON(=O)=O	C4H8N2O7	196.11	0.98	5.777	-4.797	0.0216
106-93-4	1,2-dibromoethane;dibromoethane, 1,2-;ethylene dibromide;ethane, 1,2-dibromo-;dibromomethane;1,2,dibromoethane;1,2dibromoethane;ethylene dibromide (edb);1,2-dibromoethane dibromoethane, 1,2- ethylene dibromide ethane, 1,2-dibromo- dibromomethane 1,2,dibromoethane 1,2dibromoethane ethylene dibromide (edb)	NO	NO	7	NO	NO	10	TRUE	1	10	High		FALSE	171	35.5	YES	YES	TRUE	TRUE	268	245		HARMON	CARC					1	1	1	1	1	1	1	1	1	1	1	1		BrCCBr	C2H4Br2	187.87	1.96	4	-2.04	0.151
56-23-5	tetrachloromethane;carbon tetrachloride;methane, tetrachloro-;carbontetrachloride;carbon-tetrachloride-;tetrachloromethane carbon tetrachloride methane, tetrachloro- carbontetrachloride carbon-tetrachloride-	NO	NO	7	NO	NO	10	TRUE	1	10	High		FALSE	171	35.5	YES	YES	TRUE	TRUE	268	245		HARMON	CARC-STOT RE					1	1	1	1	1	1	1	1	1	1	1	1		ClC(Cl)(Cl)Cl	CCl4	153.82	2.83	4	-1.17	1.21
3896-11-5	phenol, 2-(5-chloro-2h-benzotriazol-2-yl)-6-(1,1-dimethylethyl)-4-methyl-;bumetrizole;2-tert-butyl-6-(5-chloro-2h-benzotriazol-2-yl)-4-methylphenol;p-cresol, 2-tert-butyl-6-(5-chloro-2h-benzotriazol-2-yl)-;phenol, 2-(5-chloro-2h-benzotriazol- 2-yl)-6-(1,1-dimethylethyl)-4-methyl-;tk 10048;phenol, 2-(5-chloro-2h-benzotriazol-2-yl)-6-(1,1-dimethylethyl)-4-methyl- bumetrizole 2-tert-butyl-6-(5-chlor…	NO	NO	7	NO	NO	10	TRUE	10	1	High		FALSE	171	8.5	YES	YES	TRUE	TRUE	268	428		not classified	not applicable		x	x	x	10	10	10	10	10	10	10	10	10	10	10	10		Cc1cc(N2Nc3ccc(Cl)cc3N2)c(O)c(C(C)(C)C)c1	C17H20ClN3O	317.8	5.09	12	-6.91	8.73
8016-11-3	linseed oil, epoxidized;epoxidized linseed oil;elo;elso;linseed oil, epoxidized epoxidized linseed oil elo elso	NO	NO	7	NO	NO	10	TRUE	10	1	High		FALSE	171	8.5	YES	YES	TRUE	TRUE	268	428		not classified	not applicable		x	x		10	10	6	6	6	6	10	10	3	10	3	10		CCCC=CCC=CCC=CCCCCCCCOC(=O)C(COC(=O)CCCCCCCC=CCC=CCC=CCC)OC(=O)CCCCCCC=CCC1C(CC=CCCC)O1	C57H92O7	889.29	12	12	0	1850
101-72-4	n-isopropyl-n'-phenyl-p-phenylenediamine;1,4-benzenediamine, n1-(1-methylethyl)-n4-phenyl-;4-(isopropylamino) diphenylamine;n-isopropyl-n’-phenyl-p-phenylenediamine (ippd);1,4-benzenediamine, n-(1-methylethyl)-n'-phenyl-;n-phenyl-n'-isopropyl-p-phenylenediamine;1,4-benzenediamine, n-(1-methylethyl)-n’-phenyl-;n-isopropyl-n'-phenylbenzene-1,4-diamine;p-phenylenediamine, n-isopropyl-n'-phenyl-;n-is…	NO	NO	7	NO	NO	10	TRUE	10	1	High		FALSE	171	8.5	YES	YES	TRUE	TRUE	268	428		not classified	not applicable		x	x	x	10	10	10	10	10	10	10	10	10	10	10	10		CC(C)Nc1ccc(Nc2ccccc2)cc1	C15H18N2	226.31	3.28	10.51	-7.23	0.355
106-50-3	1,4-phenylenediamine (4-aminoaniline);1,4-benzenediamine;p-phenylenediamine;p-phenylenediamine dihydrochloride;benzene-1,4-diamine;4-amino-aniline;1,4-phenylenediamine;paraphenylenediamine;para-phenylenediamine;4-phenylenediamine;phenylenediamine;1,4-benzenediamine (p-phenylenediamine);1,4-phenylenediamine*;1,4-phenylenediamine (4-aminoaniline) 1,4-benzenediamine p-phenylenediamine p-phenylenedia…	NO (Toxicity Score of 1 confirmed)	NO	7	NO	NO	10	TRUE	10	1	Low		FALSE	171	8.5	YES	YES	TRUE	TRUE	268	428		OTH-NO	STOT RE			x	x	6	6	6	6	10	6	6	6	10	6	10	6		Nc1ccc(N)cc1	C6H8N2	108.14	-0.3	7.26	-7.56	0.0142
1129-42-6	6-methyl-2-oxoperhydropyrimidin-4-ylurea;1-(6-methyl-2-oxohexahydropyrimidin-4-yl)urea;urea, (hexahydro-6-methyl-2-oxo-4-pyrimidinyl)-;crotonylidenediurea;6-methyl-2-oxoperhydropyrimidin-4-ylurea 1-(6-methyl-2-oxohexahydropyrimidin-4-yl)urea urea, (hexahydro-6-methyl-2-oxo-4-pyrimidinyl)- crotonylidenediurea	NO	NO	7	NO	NO	10	TRUE	10	1	High		FALSE	171	8.5	YES	YES	TRUE	TRUE	268	428		not classified	not applicable		x	x	x	10	10	10	10	10	10	10	10	10	6	10	10		CC1CC(NC(N)=O)NC(=O)N1	C6H12N4O2	172.18	-1.82	12	-13.82	2.08e-05
1163-19-5	decabromodiphenyl ether;benzene, 1,1'-oxybis[2,3,4,5,6-pentabromo-;decabromobiphenyl oxide;decabromodiphenyl oxide;decabromodiphenyl oxide, technical grade (77.4% dbdpo, 21.8% nonabromodiphenyl oxide, 0.8% octabromodiphenyl oxide);decabromo diphenyloxide;decabromodiphenil oxide;benzene, 1,1 -oxybis[2,3,4,5,6-pentabromo-;benzene, 1,1’-oxybis[2,3,4,5,6-pentabromo-;bis(pentabromophenyl) ether;1,1'-o…	NO (Toxicity Score of 1 confirmed)	NO	7	NO	NO	10	TRUE	10	1	Low		FALSE	171	8.5	YES	YES	TRUE	TRUE	268	428		OTH-NO	MUTA-REPR-STOT RE		x	x		10	10	6	6	6	6	10	10	3	10	3	10		Brc1c(Br)c(Br)c(Br)c(Br)c1Oc1c(Br)c(Br)c(Br)c(Br)c1Br	C12Br10O	959.22	12	12	0	581
125643-61-0	benzenepropanoic acid, 3,5-bis(1,1-dimethylethyl)-4-hydroxy-, c7-9-branched alkyl esters;reaction mass of isomers of c7-9-alkyl 3-(3,5-di-trans-butyl-4-hydroxyphenyl)propionate;irganox 1135;reaction mass of c7-9-alkyl 3-(3,5-di-trans-butyl-4-hydroxyphenyl)propionate;nauguard ps-48;c7-9-(branched)-alkyl 3-(3,5-di-tert-butyl-4-hydroxyphenyl)propanoate;tk 11014;benzenepropanoic acid, 3,5-bis(1,1-dim…	NO	NO	7	NO	NO	10	TRUE	10	1	High		FALSE	171	8.5	YES	YES	TRUE	TRUE	268	428		not classified	not applicable		x		x	10	10	10	10	10	10	6	6	6	6	6	6		CCCC(CC)COC(=O)CCc1cc(C(C)(C)C)c(O)c(C(C)(C)C)c1	C24H40O3	376.55	7.93	12	-4.07	0.876
1506-02-1	tonalide;6-acetyl-1,1,2,4,4,7-hexamethyltetraline;ethanone, 1-(5,6,7,8-tetrahydro-3,5,5,6,8,8-hexamethyl-2-naphthalenyl)-;1-(5,6,7,8-tetrahydro-3,5,5,6,8,8-hexamethyl-2-naphthyl)ethan-1-one;1-(3,5,5,6,8,8-hexamethyl-5,6,7,8-tetrahydronaphthalen-2-yl)ethanone;ethanone, 1-(5,6,7,8-tetrahydro-3,5,5,6,8,8-hexamethyl-2-naphthalenyl)-van;2'-acetonaphthone, 5',6',7',8'-tetrahydro-3',5',5',6',8',8'-hexam…	NO	NO	7	NO	NO	10	TRUE	10	1	High		FALSE	171	8.5	YES	YES	TRUE	TRUE	268	428		not classified	not applicable				x	6	6	10	10	10	10	6	6	6	6	6	6		CC1CC(C)(C)c2cc(C(C)=O)c(C)cc2C1(C)C	C18H26O	258.38	5.7	7.945	-2.245	11.2
1709-70-2	phenol, 4,4',4''-[(2,4,6-trimethyl-1,3,5-benzenetriyl)tris(methylene)]tris[2,6-bis(1,1-dimethylethyl)-;4,4',4''-[(2,4,6-trimethylbenzene-1,3,5-triyl)trimethanediyl]tris(3,5-di-tert-butylphenol);3,3',3'',5,5',5''-hexa-tert-butyl-?,?',?''-(mesitylene-2,4,6-triyl)tri-p-cresol;phenol, 4,4',4''-[(2,4,6-trimethyl-1,3,5-benzenetriyl)tris(methylene)]tris[2,6-bis(1,1-dimethylethyl)- 4,4',4''-[(2,4,6-trime…	NO	NO	7	NO	NO	10	TRUE	10	1	High		FALSE	171	8.5	YES	YES	TRUE	TRUE	268	428		not classified	not applicable		x	x		10	10	6	6	6	6	10	10	3	10	3	10		Cc1c(Cc2c(C(C)(C)C)cc(O)cc2C(C)(C)C)c(C)c(Cc2c(C(C)(C)C)cc(O)cc2C(C)(C)C)c(C)c1Cc1c(C(C)(C)C)cc(O)cc1C(C)(C)C	C54H78O3	775.15	12	12	0	2650
215247-95-3	8,18-dichloro-5,15-diethyl-5,15-dihydrodiindolo[3,2-b:3',2'-m]triphenodioxazine;diindolo[2,3-c:2',3'-n]triphenodioxazine, 9,19-dichloro-5,15-diethyl-5,15-dihydro-;2,20-dichloro 13,31-diethyl-4,22-dioxa-13,18,31,36-tetraazanonacyclo[19.15.0.03,19.05,17.06,14.07,12.023,25.024,32.025,30]hexatriaconta-1(36),2,5,7,9,11,14,16,18,20,23,25,27,29,32,34-hexadecaene;c.i. 51319;carbazole dioxazine violet;car…	NO	NO	7	NO	NO	10	TRUE	10	1	High		FALSE	171	8.5	YES	YES	TRUE	TRUE	268	428		not classified	not applicable		x	x		10	10	6	6	6	6	6	6	6	10	6	10		CCN1c2ccccc2-c2c1ccc1c2OC2=C(Cl)C3C(=C(Cl)C2=N1)Oc1c(ccc2c1-c1ccccc1N2CC)N=3	C34H22Cl2N4O2	589.45	9.44	12	-2.56	3.23
21850-44-2	benzene, 1,1'-(1-methylethylidene)bis[3,5-dibromo-4-(2,3-dibromopropoxy)-;1,1'-(isopropylidene)bis[3,5-dibromo-4-(2,3-dibromopropoxy)benzene];tetrabromobisphenol a-bis(2,3-dibromopropyl ether);1,1'-propane-2,2-diylbis[3,5-dibromo-4-(2,3-dibromopropoxy)benzene];benzene, 1,1'-(1-methylethylidene)bis 3,5-dibromo-4-(2,3-dibromopropoxy)-;propane, 2,2-bisХ3,5-dibromo-4-(2,3-dibromopropoxy)phenylе-;benz…	NO	NO	7	NO	NO	10	TRUE	10	1	High		FALSE	171	8.5	YES	YES	TRUE	TRUE	268	428		not classified	not applicable		x	x		10	10	6	6	6	6	10	10	3	10	3	10		CC(C)(c1cc(Br)c(OCC(Br)CBr)c(Br)c1)c1cc(Br)c(OCC(Br)CBr)c(Br)c1	C21H20Br8O2	943.65	11.52	12	-0.48	6380
2425-79-8	1,4-butanediol diglycidyl ether;oxirane, 2,2'-[1,4-butanediylbis(oxymethylene)]bis-;oxirane, 2,2'- 1,4-butanediylbis(oxymethylene) b;oxirane, 2,2'- 1,4-butanediylbis(oxymethylene) bis-;oxirane, 2,2’-[1,4-butanediylbis(oxymethylene)]bis-;1,4-bis(2,3-epoxypropoxy)butane;2,2'-[butane-1,4-diylbis(oxymethylene)]dioxirane;butane, 1,4-bis(2,3-epoxypropoxy)-;oxirane, 2,2'-Х1,4-butanediylbis(oxymethylene)…	NO	NO	7	NO	NO	10	TRUE	10	1	High		FALSE	171	8.5	YES	YES	TRUE	TRUE	268	428		not classified	not applicable			x	x	6	6	10	10	10	6	6	6	10	6	10	6		C(CCCOCC1CO1)OCC1CO1	C10H18O4	202.24	-0.15	7.693	-7.843	0.0164
24800-44-0	propanol, [(1-methyl-1,2-ethanediyl)bis(oxy)]bis-;tripropylene glycol;[(methylethylene)bis(oxy)]dipropanol;1,1'-[propane-1,2-diylbis(oxy)]dipropan-1-ol;tripropylene glycol (propanol, [(1-methyl-1,2-ethanediyl)bis(oxy)]bis-);propanol, [(1-methyl-1,2-ethanediyl)bis(oxy)]bis- tripropylene glycol [(methylethylene)bis(oxy)]dipropanol 1,1'-[propane-1,2-diylbis(oxy)]dipropan-1-ol tripropylene glycol (pr…	NO	NO	7	NO	NO	10	TRUE	10	1	High		FALSE	171	8.5	YES	YES	TRUE	TRUE	268	428		not classified	not applicable			x	x	6	6	10	10	10	10	6	6	10	6	10	10		CCC(O)OCC(C)OC(O)CC	C9H20O4	192.24	-0.5	8.02	-8.52	0.00762
25550-98-5	phosphorous acid, diisodecyl phenyl ester;diisodecyl phenyl phosphite;bis(8-methylnonyl) phenyl phosphite;phosphorous acid, diisodecyl phenyl ester diisodecyl phenyl phosphite bis(8-methylnonyl) phenyl phosphite	NO	NO	7	NO	NO	10	TRUE	10	1	High		FALSE	171	8.5	YES	YES	TRUE	TRUE	268	428		not classified	not applicable		x	x		10	10	6	6	6	6	10	10	6	10	6	10		CC(C)CCCCCCCOP(OCCCCCCCC(C)C)Oc1ccccc1	C26H47O3P	438.6	10.41	11.986	-1.576	59.8
27138-31-4	oxydipropane-1,1-diyl dibenzoate	NO (Toxicity Score of 1 confirmed)	NO	7	NO	NO	10	TRUE	10	1	Low		FALSE	171	8.5	YES	YES	TRUE	TRUE	268	428		OTH-NO	REPR		x	x	x	10	10	10	10	10	10	6	6	10	3	10	6		CCC(OC(CC)OC(=O)c1ccccc1)OC(=O)c1ccccc1	C20H22O5	342.37	3.88	11.494	-7.614	0.00977
29911-28-2	2-propanol, 1-(2-butoxy-1-methylethoxy)-;dipropylene glycol n-butyl ether;1-(2-butoxy-1-methylethoxy)propan-2-ol;1-[(1-butoxypropan-2-yl)oxy]propan-2-ol;2-propanol, 1-(2-butoxy-1-methylethoxy)- dipropylene glycol n-butyl ether 1-(2-butoxy-1-methylethoxy)propan-2-ol 1-[(1-butoxypropan-2-yl)oxy]propan-2-ol	NO	NO	7	NO	NO	10	TRUE	10	1	High		FALSE	171	8.5	YES	YES	TRUE	TRUE	268	428		not classified	not applicable			x	x	6	6	6	6	10	6	6	6	10	6	10	6		CCCCOCC(C)OCC(C)O	C10H22O3	190.27	1.13	8.09	-6.96	0.0526
3081-14-9	n,n'-bis(1,4-dimethylpentyl)-p-phenylenediamine;1,4-benzenediamine, n,n’-bis(1,4-dimethylpentyl)-;1,4-benzenediamine, n,n'-bis(1,4-dimethylpentyl)-;n,n'-bis(5-methylhexan-2-yl)benzene-1,4-diamine;p-phenylenediamine, n,n'-bis(1,4-dimethylpentyl)-;n,n‘-bis(1,4-dimethylpentyl)-1,4-benzenediamine;1-n,4-n-bis(5-methylhexan-2-yl)benzene-1,4-diamine;77pd;s77;n,n'-bis(1,4-dimethylpentyl)-p-phenylenediami…	NO	NO	7	NO	NO	10	TRUE	10	1	High		FALSE	171	8.5	YES	YES	TRUE	TRUE	268	428		not classified	not applicable		x	x	x	10	10	10	10	10	10	6	6	10	10	10	6		CC(C)CCC(C)Nc1ccc(NC(C)CCC(C)C)cc1	C20H36N2	304.5	6.3	11.701	-5.401	3.03
3147-75-9	phenol, 2-(2h-benzotriazol-2-yl)-4-(1,1,3,3-tetramethylbutyl)-;2-(2h-benzotriazol-2-yl)-4-(1,1,3,3-tetramethylbutyl)phenol;2-(2h-benzotriazol-2-yl)-4-(2,4,4-trimethylpentan-2-yl)phenol;octrizole (phenol, 2-(2h-benzotriazol-2-yl)-4-(1,1,3,3-tetramethylbutyl)-);phenol, 2-(2h-benzotriazol-2-yl)-4-(1,1,3,3-tetramethylbutyl)- 2-(2h-benzotriazol-2-yl)-4-(1,1,3,3-tetramethylbutyl)phenol 2-(2h-benzotriaz…	NO	NO	7	NO	NO	10	TRUE	10	1	High		FALSE	171	8.5	YES	YES	TRUE	TRUE	268	428		not classified	not applicable		x	x	x	10	10	10	10	10	10	10	10	10	10	10	10		CC(C)(C)CC(C)(C)c1ccc(O)c(N2Nc3ccccc3N2)c1	C20H27N3O	325.43	5.75	12	-6.25	25.4
31694-55-0	poly(oxy-1,2-ethanediyl), ?,?’,?’’-1,2,3-propanetriyltris[?-hydroxy-;poly(oxy-1,2-ethanediyl), .alpha.,.alpha.',.alpha.''-1,2,3-propanetriyltris[.omega.-hydroxy-;glycerol, ethoxylated;alkoxylation reaction product of glycerin as starter and ethylene oxyde (eo) as monomer;glycerol polyether with ethylene oxide;poly(oxy-1,2-ethanediyl), ?,?’,?’’-1,2,3-propanetriyltris[?-hydroxy- poly(oxy-1,2-ethane…	NO	NO	7	NO	NO	10	TRUE	10	1	High		FALSE	171	8.5	YES	YES	TRUE	TRUE	268	428		not classified	not applicable		x	x	x	10	10	10	10	10	10	10	10	10	10	10	10		OCCOCCOCCOCCOCCOOCCOCCOCCOCCOCCOCC(O)COCCOCCOCCOOCOCCO	C32H66O20	770.82	-2	12	-14	1.29e-05
36888-99-0	2,4,6(1h,3h,5h)-pyrimidinetrione, 5,5’-(1h-isoindole-1,3(2h)-diylidene)bis-;5,5'-(1h-isoindole-1,3(2h)-diylidene)dibarbituric acid;5,5'-(1h-isoindole-1,3(2h)-diylidene)dipyrimidine-2,4,6(1h,3h,5h)-trione;2,4,6(1h,3h,5h)-pyrimidinetrione, 5,5'-(1h-isoindole-1,3(2h)-diylidene)bis-;2,4,6(1h,3h,5h)-pyrimidinetrione, 5,5’-(1h-isoindole-1,3(2h)-diylidene)bis- 5,5'-(1h-isoindole-1,3(2h)-diylidene)dibarb…	NO	NO	7	NO	NO	10	TRUE	10	1	High		FALSE	171	8.5	YES	YES	TRUE	TRUE	268	428		not classified	not applicable		x	x	x	10	10	10	10	10	10	10	10	10	10	10	10		O=C1C(=C2c3ccccc3C(=C3C(=O)NC(=O)NC3=O)N2)C(=O)NC(=O)N1	C16H9N5O6	367.26	-1.91	12	-13.91	9.28e-05
3794-83-0	phosphonic acid, (1-hydroxyethylidene)bis-, tetrasodium salt	NO	NO	7	NO	NO	10	TRUE	10	1	High		FALSE	171	8.5	YES	YES	TRUE	TRUE	268	428		not classified	not applicable		x	x	x	10	10	10	10	10	10	10	10	10	10	10	10		OC(COP(O)O)OP(O)O	C2H8O7P2	206.02	-0.83	12	-12.83	0.00283
38103-06-9	4,4'-[(isopropylidene)bis(p-phenyleneoxy)]diphthalic dianhydride;1,3-isobenzofurandione, 5,5'-[(1-methylethylidene)bis(4,1-phenyleneoxy)]bis-;5,5'-[propane-2,2-diylbis(benzene-4,1-diyloxy)]bis(2-benzofuran-1,3-dione);1,3-isobenzofurandione, 5,5'- (1-methylethylidene)bis(4,1-phenyleneoxy) bis-;1,3-isobenzofurandione, 5,5'-Х(1-methylethylidene)bis(4,1-phenyleneoxy)еbis-;5,5'-[propane-2,2-diylbis(4,…	NO	NO	7	NO	YES	10	TRUE	10	1	High		FALSE	171	8.5	YES	YES	TRUE	TRUE	268	428		not classified	not applicable		x	x	x	10	10	10	10	10	10	10	10	6	10	6	10		CC(C)(c1ccc(Oc2ccc3c(c2)C(=O)OC3=O)cc1)c1ccc(Oc2ccc3c(c2)C(=O)OC3=O)cc1	C31H20O8	520.46	8.87	12	-3.13	832
4979-32-2	2-benzothiazolesulfenamide, n,n-dicyclohexyl-;n,n-dicyclohexyl-2-benzothiazolessulfenamide;n,n-dicyclohexyl-2-benzothiazolesulfenamide;n,n-dicyclohexylbenzothiazole-2-sulphenamide;n-(1,3-benzothiazol-2-ylsulfanyl)-n-cyclohexylcyclohexanamine;n-(1,3-benzothiazol-2-yl-sulfanyl)-n-benzyl-1-phenylmethanamine;2-benzothiazolesulfenamide, n,n-dicyclohexyl- n,n-dicyclohexyl-2-benzothiazolessulfenamide n,…	NO	NO	7	NO	NO	10	TRUE	10	1	High		FALSE	171	8.5	YES	YES	TRUE	TRUE	268	428		not classified	not applicable		x	x	x	10	10	10	10	10	10	10	10	10	10	10	10		C1CCCCC1N(C1CCCCC1)SC1=Nc2ccccc2S1	C19H26N2S2	346.54	4.8	11.769	-6.969	1.21
5102-83-0	butanamide, 2,2’-[(3,3’-dichloro[1,1’-biphenyl]-4,4’-diyl)bis(azo)]bis[n-(2,4-dimethylphenyl)-3-oxo-;2,2'-[(3,3'-dichloro[1,1'-biphenyl]-4,4'-diyl)bis(azo)]bis[n-(2,4-dimethylphenyl)-3-oxobutyramide];2,2'-[(3,3'-dichlorobiphenyl-4,4'-diyl)didiazene-2,1-diyl]bis[n-(2,4-dimethylphenyl)-3-oxobutanamide];butanamide, 2,2'-[[3,3'-dichloro[1,1'-biphenyl]-4,4'-diyl]bis(azo)]bis[n-(2,4-dimethylphenyl)-3-o…	NO	NO	7	NO	NO	10	TRUE	10	1	High		FALSE	171	8.5	YES	YES	TRUE	TRUE	268	428		not classified	not applicable		x	x	x	10	10	10	10	10	10	6	6	6	10	6	6		Cc1ccc(NC(=O)C(C(C)=O)N=Nc2ccc(-c3ccc(N=NC(C(C)=O)C(=O)Nc4ccc(C)cc4C)c(Cl)c3)cc2Cl)c(C)c1	C36H34Cl2N6O4	685.57	8.11	12	-3.89	0.674
5468-75-7	butanamide, 2,2'-[(3,3'-dichloro[1,1'-biphenyl]-4,4'-diyl)bis(2,1-diazenediyl)]bis[n-(2-methylphenyl)-3-oxo-;butanamide, 2,2’-[(3,3’-dichloro[1,1’-biphenyl]-4,4’-diyl)bis(azo)]bis[n-(2-methylphenyl)-3-oxo-;2,2'-[(3,3'-dichloro[1,1'-biphenyl]-4,4'-diyl)bis(azo)]bis[n-(2-methylphenyl)-3-oxobutyramide];butanamide, 2,2'-[(3,3'-dichloro[1,1'-biphenyl]-4,4'-diyl)bis(azo)]bis[n-(2-methylphenyl)-3-oxo-;2…	NO	NO	7	NO	NO	10	TRUE	10	1	High		FALSE	171	8.5	YES	YES	TRUE	TRUE	268	428		not classified	not applicable		x	x	x	10	10	10	10	10	10	6	6	10	10	10	6		Cc1ccccc1NC(=O)C(C(C)=O)N=Nc1ccc(-c2ccc(N=NC(C(C)=O)C(=O)Nc3ccccc3C)c(Cl)c2)cc1Cl	C34H30Cl2N6O4	657.52	7.02	12	-4.98	0.823
5567-15-7	butanamide, 2,2'-[(3,3'-dichloro[1,1'-biphenyl]-4,4'-diyl)bis(2,1-diazenediyl)]bis[n-(4-chloro-2,5-dimethoxyphenyl)-3-oxo-;c.i. pigment yellow 83;butanamide, 2,2’-[(3,3’-dichloro[1,1’-biphenyl]-4,4’-diyl)bis(azo)]bis[n-(4-chloro-2,5-dimethoxyphenyl)-3-oxo-;2,2'-[(3,3'-dichloro[1,1'-biphenyl]-4,4'-diyl)bis(azo)]bis[n-(4-chloro-2,5-dimethoxyphenyl)-3-oxobutyramide];2,2'-[(3,3'-dichlorobiphenyl-4,4'…	NO	NO	7	NO	NO	10	TRUE	10	1	High		FALSE	171	8.5	YES	YES	TRUE	TRUE	268	428		not classified	not applicable		x	x	x	10	10	10	10	10	10	10	10	10	10	10	10		CC(=O)C(C(=O)Nc1cc(OC)c(Cl)cc1OC)N=Nc1ccc(-c2ccc(N=NC(C(C)=O)C(=O)Nc3cc(OC)c(Cl)cc3OC)c(Cl)c2)cc1Cl	C36H32Cl4N6O8	818.46	7.54	12	-4.46	27.5
55934-93-5	[(butoxymethylethoxy)methylethoxy]propan-1-ol;1-({1-[(1-butoxypropan-2-yl)oxy]propan-2-yl}oxy)propan-1-ol;propanol, [2-(2-butoxymethylethoxy)methylethoxy]-;1-[2-(2-butoxy-1-methylethoxy)-1-methylethoxy]propan-1-ol;tripropylene glycol n-butyl ether;[(butoxymethylethoxy)methylethoxy]propan-1-ol 1-({1-[(1-butoxypropan-2-yl)oxy]propan-2-yl}oxy)propan-1-ol propanol, [2-(2-butoxymethylethoxy)methyletho…	NO	NO	7	NO	NO	10	TRUE	10	1	High		FALSE	171	8.5	YES	YES	TRUE	TRUE	268	428		not classified	not applicable		x	x	x	10	10	10	10	10	10	10	10	10	10	10	10		CCCCOCC(C)OCC(C)OC(O)CC	C13H28O4	248.35	1.27	9.916	-8.646	0.0495
57583-54-7	benzene-1,3-diyl tetraphenyl bis(phosphate);phosphoric acid, 1,3-phenylene tetraphenyl ester;tetraphenyl m-phenylene bis(phosphate);benzene-1,3-diyl tetraphenyl bis(phosphate) phosphoric acid, 1,3-phenylene tetraphenyl ester tetraphenyl m-phenylene bis(phosphate)	NO	NO	7	NO	NO	10	TRUE	10	1	High		FALSE	171	8.5	YES	YES	TRUE	TRUE	268	428		not classified	not applicable		x	x	x	10	10	10	10	10	10	6	6	10	10	10	6		O=P(Oc1ccccc1)(Oc1ccccc1)Oc1cccc(OP(=O)(Oc2ccccc2)Oc2ccccc2)c1	C30H24O8P2	574.43	7.41	12	-4.59	0.798
59113-36-9	propanediol, oxybis-;oxybispropanediol;1,1'-oxydipropane-1,1-diol;diglycerol (same as diglycerin);propanediol, oxybis- oxybispropanediol 1,1'-oxydipropane-1,1-diol diglycerol (same as diglycerin)	NO	NO	7	NO	NO	10	TRUE	10	1	High		FALSE	171	8.5	YES	YES	TRUE	TRUE	268	428		not classified	not applicable			x	x	6	6	10	10	10	10	10	10	10	10	10	10		CCC(O)(O)OC(O)(O)CC	C6H14O5	166.17	-0.43	9.278	-9.708	0.00664
593-85-1	carbonic acid, compd. with guanidine (1:2)	NO	NO	7	NO	NO	10	TRUE	10	1	High		FALSE	171	8.5	YES	YES	TRUE	TRUE	268	428		not classified	not applicable		x	x	x	6	10	10	10	10	10	10	10	10	10	10	10		NC(N)=NOC(=O)ON=C(N)N	C3H8N6O3	176.13	-2	11.004	-13.004	0.000136
6197-30-4	2-ethylhexyl 2-cyano-3,3-diphenylacrylate;2-propenoic acid, 2-cyano-3,3-diphenyl-, 2-ethylhexyl ester;octocrilene;2-ethylhexyl 2-cyano-3,3-diphenylprop-2-enoate;acrylic acid, 2-cyano-3,3-diphenyl-, 2-ethylhexyl ester;2-ethylhexyl-2-cyano-3,3'diphenyl acrylate;2-ethylhexyl 2-cyano-3,3-diphenylacrylate 2-propenoic acid, 2-cyano-3,3-diphenyl-, 2-ethylhexyl ester octocrilene 2-ethylhexyl 2-cyano-3,3-…	NO	NO	7	NO	NO	10	TRUE	10	1	High		FALSE	171	8.5	YES	YES	TRUE	TRUE	268	428		not classified	not applicable		x	x	x	10	10	10	10	10	10	6	6	10	10	10	6		CCCCC(CC)COC(=O)C(C#N)=C(c1ccccc1)c1ccccc1	C24H27NO2	361.46	6.88	12	-5.12	1.26
63500-71-0	2h-pyran-4-ol, tetrahydro-4-methyl-2-(2-methylpropyl)-;a mixture of: cis-tetrahydro-2-isobutyl-4-methylpyran-4-ol;reaction mass of (rel-2r,4r)-tetrahydro-4-methyl-2-(2-methylpropyl)-2h-pyran-4-ol and (rel-2r,4s)-tetrahydro-4-methyl-2-(2-methylpropyl)-2h-pyran-4-ol;trans-tetrahydro-2-isobutyl-4-methylpyran-4-ol;tetrahydro-2-isobutyl-4-methylpyran-4-ol;tetrahydro-4-methyl-2-(2-methylpropyl)pyran-4-…	NO	NO	7	NO	NO	10	TRUE	10	1	High		FALSE	171	8.5	YES	YES	TRUE	TRUE	268	428		not classified	not applicable			x		6	6	6	6	6	6	6	6	10	6	10	6		CC(C)CC1CC(C)(O)CCO1	C10H20O2	172.26	2.16	8.321	-6.161	0.171
6358-30-1	diindolo[3,2-b:3’,2’-m]triphenodioxazine, 8,18-dichloro-5,15-diethyl-5,15-dihydro-;8,18-dichloro-5,15-diethyl-5,15-dihydrodiindolo[3,2-b:3',2'-m]triphenodioxazine;diindolo[2,3-c:2',3'-n]triphenodioxazine, 9,19-dichloro-5,15-diethyl-5,15-dihydro-;8,18-dichloro-5,15-diethyl-5,15-dihydrocarbazolo[3',2':5,6][1,4]oxazino[2,3-b]indolo[2,3-i]phenoxazine;diindolo[3,2-b:3',2'-m]triphenodioxazine, 8,18-dic…	NO	NO	7	NO	NO	10	TRUE	10	1	High		FALSE	171	8.5	YES	YES	TRUE	TRUE	268	428		not classified	not applicable		x	x		10	10	6	6	6	6	6	6	6	10	6	10		CCN1c2ccccc2-c2cc3c(cc12)OC1=C(Cl)C2C(=C(Cl)C1=N3)Oc1cc3c(cc1N=2)-c1ccccc1N3CC	C34H22Cl2N4O2	589.45	9.44	12	-2.56	3.23
6358-31-2	c.i. pigment yellow 74;butanamide, 2-[(2-methoxy-4-nitrophenyl)azo]-n-(2-methoxyphenyl)-3-oxo-;2-[(2-methoxy-4-nitrophenyl)azo]-n-(2-methoxyphenyl)-3-oxobutyramide;2-[(2-methoxy-4-nitrophenyl)diazenyl]-n-(2-methoxyphenyl)-3-oxobutanamide;butanamide, 2- (2-methoxy-4-nitrophenyl)azo -n-(2-methoxyphenyl)-3-oxo-;butanamide, 2-Х(2-methoxy-4-nitrophenyl)azoе-n-(2-methoxyphenyl)-3-oxo-;o-acetoacetanisid…	NO	NO	7	NO	NO	10	TRUE	10	1	High		FALSE	171	8.5	YES	YES	TRUE	TRUE	268	428		not classified	not applicable		x	x	x	10	10	10	10	10	10	10	10	10	10	10	10		CC(=O)C(C(=O)Nc1ccccc1OC)N=Nc1ccc(N(=O)=O)cc1OC	C18H18N4O6	386.34	2.99	12	-9.01	0.102
6425-39-4	morpholine, 4,4’-(oxydi-2,1-ethanediyl)bis-;2,2'-dimorpholinyldiethyl ether;4,4'-(oxydiethane-2,1-diyl)dimorpholine;morpholine, 4,4'-(oxydi-2,1-ethanediyl)bis-;morpholine, 4,4'-(oxydiethylene)di-;morpholine, 4,4’-(oxydi-2,1-ethanediyl)bis- 2,2'-dimorpholinyldiethyl ether 4,4'-(oxydiethane-2,1-diyl)dimorpholine morpholine, 4,4'-(oxydi-2,1-ethanediyl)bis- morpholine, 4,4'-(oxydiethylene)di-	NO	NO	7	NO	NO	10	TRUE	10	1	High		FALSE	171	8.5	YES	YES	TRUE	TRUE	268	428		not classified	not applicable		x	x	x	10	10	10	10	10	10	10	10	10	10	10	10		C1CN(CCOCCN2CCOCC2)CCO1	C12H24N2O3	244.32	-1.31	10.835	-12.145	0.000487
6535-46-2	2-naphthalenecarboxamide, 3-hydroxy-n-(2-methylphenyl)-4-[(2,4,5-trichlorophenyl)azo]-;3-hydroxy-n-(o-tolyl)-4-[(2,4,5-trichlorophenyl)azo]naphthalene-2-carboxamide;3-hydroxy-n-(2-methylphenyl)-4-[(2,4,5-trichlorophenyl)diazenyl]naphthalene-2-carboxamide;2-naphthalenecarboxamide, 3-hydroxy-n-(2-methylphenyl)-4- (2,4,5-trichlorophenyl)azo -;c.i. pigment red 112;2-naphthalenecarboxamide, 3-hydroxy-…	NO (Toxicity Score of 1 confirmed)	NO	7	NO	NO	10	TRUE	10	1	Low		FALSE	171	8.5	YES	YES	TRUE	TRUE	268	428		OTH-NO	MUTA		x	x	x	10	10	10	10	10	10	10	10	6	10	6	10		Cc1ccccc1NC(=O)c1cc2ccccc2c(N=Nc2cc(Cl)c(Cl)cc2Cl)c1O	C24H16Cl3N3O2	484.74	9.21	12	-2.79	36.1
68411-46-1	benzenamine, n-phenyl-, reaction products with 2,4,4-trimethylpentene	NO (Toxicity Score of 1 confirmed)	NO	7	NO	NO	10	TRUE	10	1	Low		FALSE	171	8.5	YES	YES	TRUE	TRUE	268	428		OTH-NO	STOT RE		x	x	x	10	10	10	10	10	10	10	10	6	10	6	6		CC(C)(C)CC(C)(C)c1ccc(Nc2ccccc2)cc1	C20H27N	281.42	7.05	10.513	-3.463	16.3
68515-47-9	1,2-benzenedicarboxylic acid, di-c11-14-branched alkyl esters, c13-rich;1,2-benzenedicarboxylic acid, di-c11-14-branched alkyl esters, c13-rich diisotridecyl phthalate;1,2-benzenedicarboxylic acid, di-c11-14-branched alkyl esters, c13-rich diisotridecyl phthalate;1,2-benzenedicarboxylic acid, di-c11-14-branched alkyl esters, c13-rich 1,2-benzenedicarboxylic acid, di-c11-14-branched alkyl esters, …	NO	NO	7	NO	NO	10	TRUE	10	1	High		FALSE	171	8.5	YES	YES	TRUE	TRUE	268	428		not classified	not applicable			x		6	6	3	6	3	6	10	10	1	10	3	10		CCCCCCC(C)CC(C)CCOC(=O)c1ccccc1C(=O)OCCCC(C)CC(C)CCCCC	C34H58O4	530.79	12	12	0	26.5
68604-41-1	fatty acids, c16-18 and c18-unsatd., me esters, distn. residues;uvcb substance. no iupac name available;fatty acids, c16-18 and c18-unsatd., me esters, distn. residues uvcb substance. no iupac name available	NO	NO	7	NO	NO	10	TRUE	10	1	High		FALSE	171	8.5	YES	YES	TRUE	TRUE	268	428		not classified	not applicable			x		6	6	6	6	6	6	10	10	3	10	3	10		CCC(C)CC(C)CC(C)CC(C)CCC(=O)OCC(COC(=O)CCC(C)CC(C)CC(C)CC(C)CC)OC(=O)CCC(C)CC(C)CC(C)CC(C)CC	C51H98O6	807.28	12	12	0	92.3
68604-44-4	fatty acids, c16-18 and c18-unsatd., tetraesters with pentaerythritol;fatty acids, c16-18 and c18-unsaturated, tetraesters with pentaerythritol;fatty acids, c16-18 (even numbered) and c18-unsatd., tetraesters with pentaerythritol;fatty acids, c16-18 and c18-unsatd., tetraesters with pentaerythritol fatty acids, c16-18 and c18-unsaturated, tetraesters with pentaerythritol fatty acids, c16-18 (even…	NO	NO	7	NO	NO	10	TRUE	10	1	High		FALSE	171	8.5	YES	YES	TRUE	TRUE	268	428		not classified	not applicable		x	x		10	10	6	6	6	6	10	10	3	10	3	10		CCC(C)CC(C)CC(C)CC(C)CCC(=O)OCC(COC(=O)CCC(C)CC(C)CC(C)CC(C)CC)(COC(=O)CCC(C)CC(C)CC(C)CC(C)CC)COC(=O)CCC(C)CC(C)CC(C)CC(C)CC	C69H132O8	1089.7	12	12	0	1580
68953-84-4	wingstay 100;1,4-benzenediamine, n,n’-mixed ph and tolyl derivs.;1,4-benzenediamine, n,n'-mixed phenyl and tolyl derivatives;1,4-benzenediamine, n,n'-mixed ph and tolyl derivs.;wingstay 100 1,4-benzenediamine, n,n’-mixed ph and tolyl derivs. 1,4-benzenediamine, n,n'-mixed phenyl and tolyl derivatives 1,4-benzenediamine, n,n'-mixed ph and tolyl derivs.	NO	NO	7	NO	NO	10	TRUE	10	1	High		FALSE	171	8.5	YES	YES	TRUE	TRUE	268	428		not classified	not applicable		x	x	x	10	10	10	10	10	10	10	10	10	10	10	10		Cc1ccccc1Nc1ccc(Nc2ccccc2)cc1	C19H18N2	274.35	4.59	12	-7.41	1.81
69011-36-5	poly(oxy-1,2-ethanediyl), ?-tridecyl-?-hydroxy-, branched;poly(oxy-1,2-ethanediyl), .alpha.-tridecyl-.omega.-hydroxy-, branched;isotridecanol, ethoxylated;poly(oxy-1,2-ethanediyl), ?-tridecyl-?-hydroxy-, branched poly(oxy-1,2-ethanediyl), .alpha.-tridecyl-.omega.-hydroxy-, branched isotridecanol, ethoxylated	NO	NO	7	NO	NO	10	TRUE	10	1	High		FALSE	171	8.5	YES	YES	TRUE	TRUE	268	428		not classified	not applicable		x	x	x	10	10	10	10	10	10	10	10	10	10	10	10		CC(C)CC(C)CC(C)CC(C)COCCOCCOCCOCCOCCO	C23H48O6	420.6	3.59	12	-8.41	0.151
70321-86-7	phenol, 2-(2h-benzotriazol-2-yl)-4,6-bis(1-methyl-1-phenylethyl)-;2-(2h-benzotriazol-2-yl)-4,6-bis(1-methyl-1-phenylethyl)phenol;2-(2h-benzotriazol-2-yl)-4,6-bis(2-phenylpropan-2-yl)phenol;phenol, 2-(2h-benzotriazol-2-yl)- 4,6-bis(1-methyl-1-phenylethyl)-;phenol, 2-(2h-benzotriazol-2-yl)-4,6-bis(1-methyl-1-phenylethyl)- 2-(2h-benzotriazol-2-yl)-4,6-bis(1-methyl-1-phenylethyl)phenol 2-(2h-benzotri…	NO	NO	7	NO	NO	10	TRUE	10	1	High		FALSE	171	8.5	YES	YES	TRUE	TRUE	268	428		not classified	not applicable		x	x	x	10	10	10	10	10	10	10	10	10	10	10	10		CC(C)(c1ccccc1)c1cc(C(C)(C)c2ccccc2)cc(N2Nc3ccccc3N2)c1O	C30H31N3O	449.56	7.21	12	-4.79	39.9
70356-09-1	butyl methoxydibenzoylmethane;4-tert-butyl-4'-methoxydibenzoylmethane;1,3-propanedione, 1-[4-(1,1-dimethylethyl)phenyl]-3-(4-methoxyphenyl)-;1-[4-(1,1-dimethylethyl)phenyl]-3-(4-methoxyphenyl)propane-1,3-dione;1-(4-tert-butylphenyl)-3-(4-methoxyphenyl)propane-1,3-dione;1,3-propanedione, 1- 4-(1,1-dimethylethyl)phenyl -3-(4-methoxyphenyl)-;1,3-propanedione, 1-Х4-(1,1-dimethylethyl)phenylе-3-(4-met…	NO	NO	7	NO	NO	10	TRUE	10	1	High		FALSE	171	8.5	YES	YES	TRUE	TRUE	268	428		not classified	not applicable		x	x	x	10	10	10	10	10	10	10	10	10	10	10	10		CC(C)(C)c1ccc(C(=O)CC(=O)c2ccc(OC)cc2)cc1	C20H22O3	310.37	4.51	12	-7.49	4.02
71302-83-5	hydrocarbons, c9-unsatd., polymd.;hydrocarbons, c9-unsatd, polymd.;hydrocarbons, c9-unsatd, polymd;hydrocarbons, c9-unsatd., polymd. hydrocarbons, c9-unsatd, polymd. hydrocarbons, c9-unsatd, polymd	NO	NO	7	NO	NO	10	TRUE	10	1	High		FALSE	171	8.5	YES	YES	TRUE	TRUE	268	428		not classified	not applicable		x	x		10	10	6	6	6	6	10	10	3	10	3	10		CCCCCCCCCC(CCCCCCC)CC(CCCCCCC)CC(CCCCCCC)CC(C)CCCCCCC	C45H92	633.18	12	12	0	234000
7695-91-2	dl-alpha-tocopheryl acetate;vitamin e acetate;2h-1-benzopyran-6-ol, 3,4-dihydro-2,5,7,8-tetramethyl-2-(4,8,12-trimethyltridecyl)-, acetate;3,4-dihydro-2,5,7,8-tetramethyl-2-(4,8,12-trimethyltridecyl)-2h-benzopyran-6-yl acetate;2,5,7,8-tetramethyl-2-(4,8,12-trimethyltridecyl)-3,4-dihydro-2h-chromen-6-yl acetate;2h-1-benzopyran-6-ol, 3,4-dihydro-2,5,7,8-tetramethyl- 2-(4,8,12-trimethyltridecyl)-, a…	NO	NO	7	NO	NO	10	TRUE	10	1	High		FALSE	171	8.5	YES	YES	TRUE	TRUE	268	428		not classified	not applicable			x		6	6	3	3	3	6	10	10	1	10	3	10		CC(C)CCCC(C)CCCC(C)CCCC1(C)CCc2c(C)c(OC(C)=O)c(C)c(C)c2O1	C31H52O3	472.72	12	12	0	19.2
77745-66-5	tris(11-methyldodecyl) phosphite;phosphorous acid, triisotridecyl ester;triisotridecyl phosphite;titdp;ttdp;tris(11-methyldodecyl) phosphite phosphorous acid, triisotridecyl ester triisotridecyl phosphite titdp ttdp	NO	NO	7	NO	NO	10	TRUE	10	1	High		FALSE	171	8.5	YES	YES	TRUE	TRUE	268	428		not classified	not applicable		x	x		10	10	6	6	6	6	10	10	3	10	3	10		CC(C)CCCCCCCCCCOP(OCCCCCCCCCCC(C)C)OCCCCCCCCCCC(C)C	C39H81O3P	629	12	12	0	4110
78-42-2	tris(2-ethylhexyl) phosphate;tris(2-ethylhexyl)phosphate;tris(2-ethylhexyl)phosphate (tehp);phosphoric acid, tris(2-ethylhexyl) ester;tris(2-ethylhexyl)ester phosphoric acid;tris (2-ethylhexyl) phosphate;tris(2-ethylhexyl) phosphate tris(2-ethylhexyl)phosphate tris(2-ethylhexyl)phosphate (tehp) phosphoric acid, tris(2-ethylhexyl) ester tris(2-ethylhexyl)ester phosphoric acid tris (2-ethylhexyl) p…	NO	NO	7	NO	NO	10	TRUE	10	1	High		FALSE	171	8.5	YES	YES	TRUE	TRUE	268	428		not classified	not applicable		x	x		10	10	6	6	6	6	10	10	6	10	6	10		CCCCC(CC)COP(=O)(OCC(CC)CCCC)OCC(CC)CCCC	C24H51O4P	434.61	9.49	12	-2.51	10.6
78-51-3	tris(2-butoxyethyl) phosphate;tri-2-butoxyethyl phosphate;tributoxyethyl phosphate;ethanol, 2-butoxy-, phosphate (3:1);2-butoxyethanol, phosphate (3:1);butoxyethyl)phosphate;tris(2-butoxyethyl) phosphate (tributoxyethyl phosphate) (ethanol, 2-butoxy-, phosphate (3:1));2-butoxyethanol, 1,1',1''-phosphate;tris(2-butoxyethyl) phosphate tri-2-butoxyethyl phosphate tributoxyethyl phosphate ethanol, 2-…	NO	NO	7	NO	NO	10	TRUE	10	1	High		FALSE	171	8.5	YES	YES	TRUE	TRUE	268	428		not classified	not applicable		x	x	x	10	10	10	10	10	10	10	10	10	10	10	10		CCCCOCCOP(=O)(OCCOCCCC)OCCOCCCC	C18H39O7P	398.45	3.75	12	-8.25	0.139
8027-33-6	alcohols, lanolin;eucerin;alcohols, lanolin eucerin	NO	NO	7	NO	NO	10	TRUE	10	1	High		FALSE	171	8.5	YES	YES	TRUE	TRUE	268	428		not classified	not applicable		x	x	x	10	10	6	10	10	10	10	10	6	10	6	10		CC(C)CCCC(C)C1CCC2C3CC=C4CC(O)CCC4(C)C3CCC12C	C27H46O	386.63	8.74	10.906	-2.166	162
8050-25-7	resin acids and rosin acids, esters with triethylene glycol;ester of rosin with triethylene glycol, consisting of mainly di-esters and mono-esters, as the reactor is charged with a 2:1 stoichiometric ratio of reactants (rosin and triethylene glycol), and reacted until a low 'acid value' is achieved, indicating that most of the -cooh groups of the parent rosin have been esterified.;rosin, esters w…	NO	NO	7	NO	NO	10	TRUE	10	1	High		FALSE	171	8.5	YES	YES	TRUE	TRUE	268	428		not classified	not applicable		x	x	x	10	10	10	10	10	10	10	10	10	10	10	10		CC(C)C1CCC2C(C=1)=CCC1C2(C)CCCC1(C)C(=O)OCCOCCOCCO	C26H42O5	434.59	5.22	12	-6.78	0.743
933999-84-9	1,6-bis(2,3-epoxypropoxy)hexane;reaction products of hexane-1,6-diol with 2-(chloromethyl)oxirane (1:2);1,6-bis(2,3-epoxypropoxy)hexane reaction products of hexane-1,6-diol with 2-(chloromethyl)oxirane (1:2)	NO	NO	7	NO	NO	10	TRUE	10	1	High		FALSE	171	8.5	YES	YES	TRUE	TRUE	268	428		not classified	not applicable			x	x	6	6	10	10	10	10	6	6	10	6	10	10		C(CCCCCOCC1CO1)OCC1CO1	C12H22O4	230.29	0.84	8.437	-7.597	0.0312
96-69-5	4,4'-thiobis(6-t-butyl-m-cresol);phenol, 4,4'-thiobis[2-(1,1-dimethylethyl)-5-methyl-;4,4'-thiobis(3-methyl-6-tert-butylphenol);4,4'-thiobis(6-tert-butyl-m-cresol);4,4'-thiobis(6-tert-butyl-3-cresol);phenol, 4,4’-thiobis[2-(1,1-dimethylethyl)-5-methyl-;6,6'-di-tert-butyl-4,4'-thiodi-m-cresol;4,4'-sulfanediylbis(2-tert-butyl-5-methylphenol);phenol, 4,4'-thiobis 2-(1,1-dimethylethyl)-5-methyl-;m-cr…	NO	NO	7	NO	NO	10	TRUE	10	1	High		FALSE	171	8.5	YES	YES	TRUE	TRUE	268	428		not classified	not applicable		x	x	x	10	10	10	10	10	10	6	6	6	10	6	10		Cc1cc(O)c(C(C)(C)C)cc1Sc1cc(C(C)(C)C)c(O)cc1C	C22H30O2S	358.52	8.24	12	-3.76	2.5
980-26-7	quino[2,3-b]acridine-7,14-dione, 5,12-dihydro-2,9-dimethyl-;2,9-dimethyl-5,12-dihydroquino[2,3-b]acridine-7,14-dione;quinoХ2,3-bеacridine-7,14-dione, 5,12-dihydro-2,9-dimethyl-	NO	NO	7	NO	NO	10	TRUE	10	1	High		FALSE	171	8.5	YES	YES	TRUE	TRUE	268	428		not classified	not applicable			x		6	6	6	6	6	6	6	6	10	3	10	3		Cc1ccc2c(c1)c(O)c1cc3c(cc1n2)c(O)c1cc(C)ccc1n3	C22H16N2O2	340.36	4.78	12	-7.22	0.00306
98-92-0	nicotinamide;3-carbamoylpyridine;3-pyridinecarboxamide (nicotinamide);3-pyridinecarboxamide;vitamin pp;pyridine-3-carboxamide;niacinamide [usan];niacinamide;nsa;niacinamide (nicotinamide) (3-pyridinecarboxamide) (nam);nicotinamide 3-carbamoylpyridine 3-pyridinecarboxamide (nicotinamide) 3-pyridinecarboxamide vitamin pp pyridine-3-carboxamide niacinamide [usan] niacinamide nsa niacinamide (nicotin…	NO	NO	7	NO	NO	10	TRUE	10	1	High		FALSE	171	8.5	YES	YES	TRUE	TRUE	268	428		not classified	not applicable			x	x	6	6	10	10	10	10	10	10	10	10	10	10		NC(=O)c1cccnc1	C6H6N2O	122.12	-0.37	9.556	-9.926	0.00402
111-91-1	1,1'-[methylenebis(oxy)]bis[2-chloroethane];bis(2-chloroethoxy)methane;1,1'-[methanediylbis(oxy)]bis(2-chloroethane);ethane, 1,1'-[methylenebis(oxy)]bis[2-chloro-;ethane, 1,1'- methylenebis(oxy) bis 2-chloro-;methane, bis(2-chloroethoxy)-;ethane, 1,1'-Хmethylenebis(oxy)еbisХ2-chloro-;1-chloro-2-[(2-chloroethoxy)methoxy]ethane;dichloroethylformal;ethane, 1,1'-(methylenebis(oxy))bis(2-chloro-;1,1'-…	YES (Step 1)	YES	3.3	NO	NO	10	TRUE	6	10	High		TRUE	169	34.5	YES	YES	TRUE	TRUE	329	251		JOINT	STOT RE					3	3	3	3	3	3	3	3	6	3	6	3		ClCCOCOCCCl	C5H10Cl2O2	173.03	1.3	5.103	-3.803	0.163
95-53-4	2-methylaniline;2-toluidine;toluidine, 2-;o-toluidine;benzenamine, 2-methyl-;ortho-toluidin hydrochloride;o-tolylamine;2-methylbenzenamine;o-toluidine (2-aminotoluene);2-methylaniline (2-methylbenzenamine) (o-toluidine);2-methylaniline 2-toluidine toluidine, 2- o-toluidine benzenamine, 2-methyl- ortho-toluidin hydrochloride o-tolylamine 2-methylbenzenamine o-toluidine (2-aminotoluene) 2-methylani…	YES (Step 1)	NO	3.3	NO	NO	10	TRUE	6	10	High		TRUE	169	34.5	YES	YES	TRUE	TRUE	329	251		HARMON	CARC					3	3	3	3	3	3	3	3	6	3	6	3		Cc1ccccc1N	C7H9N	107.15	1.32	5.412	-4.092	0.108
1120-71-4	1,3-propane sultone;1,2-oxathiolane, 2,2-dioxide;propane sultone;2,2-dioxide-1,2-oxathiolane;1,3-propanesultone;1,2-oxathiolane 2,2-dioxide;1,3propanesultone;1-propanesulfonic acid, 3-hydroxy-, .gamma.-sultone;3-hydroxy-1-propanesulfonic acid, γ-sultone;1,3-ppropane sultone (ec name);1,3-propane sultone (propane sultone);1,3-propane sultone 1,2-oxathiolane, 2,2-dioxide propane sultone 2,2-dioxide…	NO	NO	6	NO	NO	10	TRUE	3	10	High		FALSE	169	34.5	YES	YES	TRUE	TRUE	329	251		HARMON	CARC					1	1	1	1	3	1	1	1	3	1	3	3		O=S1(=O)CCCO1	C3H6O3S	122.14	-0.28	4	-4.28	0.0225
121-69-7	n,n-dimethylaniline;dimethylaniline, n, n-;benzenamine, n,n-dimethyl-;dimethyl-phenyl-amine;dimethylamine, n,n'-;n,ndimethylaniline;aniline, n,n-dimethyl-;n,n-dimethylbenzenamine;n,n-dimethylaniline (benzenamine, n,n-dimethyl-) (dimethyl-phenyl-amine);n,n-dimethylaniline dimethylaniline, n, n- benzenamine, n,n-dimethyl- dimethyl-phenyl-amine dimethylamine, n,n'- n,ndimethylaniline aniline, n,n-di…	NO	NO	6	NO	NO	10	TRUE	3	10	High		FALSE	169	34.5	YES	YES	TRUE	TRUE	329	251		HARMON	CARC					1	3	1	1	1	1	1	1	3	1	1	1		CN(C)c1ccccc1	C8H11N	121.17	2.31	4.944	-2.634	0.0742
4904-61-4	1,5,9-cyclododecatriene;cyclododecatriene;cyclododeca-1,5,9-triene;1,5,9-cyclododecatriene, (e,e,z)-;1,5,9-cdt;cyclododecatriene-1,5,9;1,5,9-cddt;1,5,9-cyclododecatriene (z,e,e);1,5,9-cyclododecatriene cyclododecatriene cyclododeca-1,5,9-triene 1,5,9-cyclododecatriene, (e,e,z)- 1,5,9-cdt cyclododecatriene-1,5,9 1,5,9-cddt 1,5,9-cyclododecatriene (z,e,e)	NO	NO	6	NO	YES	10	TRUE	3	10	High		FALSE	169	34.5	YES	YES	TRUE	TRUE	329	251		JOINT	CARC-REPR					1	1	3	3	3	3	3	3	1	1	1	1		C1CC=CCCC=CCCC=C1	C12H18	162.26	5.5	4.19	1.31	8.09
51422-54-9	ethyl t-butyl ethyl diether;2-(2-ethoxyethoxy)-2-methylpropane;propane, 2-(2-ethoxyethoxy)-2-methyl-;ethyl t-butyl ethyl diether 2-(2-ethoxyethoxy)-2-methylpropane propane, 2-(2-ethoxyethoxy)-2-methyl-	NO	NO	6	NO	NO	10	TRUE	3	10	High		FALSE	169	34.5	YES	YES	TRUE	TRUE	329	251		JOINT	STOT RE					1	3	1	1	1	1	1	1	3	3	3	1		CCOCCOC(C)(C)C	C8H18O2	146.22	1.65	4.419	-2.769	0.2
68921-07-3	distillates (petroleum), hydrotreated light catalytic cracked;distillates, petroleum, hydrotreated light catalytic cracked;distillates (petroleum), hydrotreated light catalytic cracked distillates, petroleum, hydrotreated light catalytic cracked	NO	NO	6	NO	NO	10	TRUE	3	10	High		FALSE	169	34.5	YES	YES	TRUE	TRUE	329	251		JOINT	CARC-STOT RE					1	1	1	1	1	1	3	1	1	1	1	1		CCC(C)CCC(C)C	C9H20	128.25	4.61	4	0.61	1.67
75-89-8	2,2,2-trifluoroethanol;2,2,2-trifluoro-ethanol;ethanol, 2,2,2-trifluoro-;2,2,2-trifluoroethanol 2,2,2-trifluoro-ethanol ethanol, 2,2,2-trifluoro-	NO	NO	6	NO	NO	10	TRUE	3	10	High		FALSE	169	34.5	YES	YES	TRUE	TRUE	329	251		JOINT	REPR-STOT RE					1	1	1	1	3	1	1	1	3	3	3	3		OCC(F)(F)F	C2H3F3O	100.04	0.41	4	-3.59	0.086
91-66-7	n,n-diethylaniline;benzenamine, n,n-diethyl-;diethyl-phenyl-amine;n,n-diethyl-aniline;aniline, n,n-diethyl-;n,n-diethylaniline (benzenamine, n,n-diethyl-);n,n-diethylaniline benzenamine, n,n-diethyl- diethyl-phenyl-amine n,n-diethyl-aniline aniline, n,n-diethyl- n,n-diethylaniline (benzenamine, n,n-diethyl-)	NO	NO	6	NO	NO	10	TRUE	3	10	High		FALSE	169	34.5	YES	YES	TRUE	TRUE	329	251		HARMON	STOT RE					3	3	1	1	1	1	1	1	1	3	1	1		CCN(CC)c1ccccc1	C10H15N	149.23	3.31	5.415	-2.105	0.143
931-36-2	2-ethyl-4-methyl-1h-imidazole;1h-imidazole, 2-ethyl-4-methyl-;2-ethyl-4-methylimidazole	NO	NO	6	NO	NO	10	TRUE	3	10	Low (affected by impurity)		FALSE	169	34.5	YES	YES	TRUE	TRUE	329	251		JOINT	CARC					3	3	1	3	3	3	1	3	3	3	3	3		CCC1NC(C)=CN=1	C6H10N2	110.15	1.64	5.245	-3.605	0.135
99-97-8	n,n-dimethyl-p-toluidine;dimethyl-p-tolyl-amine;n,n,4-trimethylaniline;benzenamine, n,n,4-trimethyl-;p-toluidine, n,n-dimethyl-;n,n,4-trimethylaniline (n,n-dimethyl-p-toluidine);n,n-dimethyl-p-toluidine dimethyl-p-tolyl-amine n,n,4-trimethylaniline benzenamine, n,n,4-trimethyl- p-toluidine, n,n-dimethyl- n,n,4-trimethylaniline (n,n-dimethyl-p-toluidine)	NO	NO	6	NO	NO	10	TRUE	3	10	High		FALSE	169	34.5	YES	YES	TRUE	TRUE	329	251		HARMON	STOT RE					3	3	1	1	1	1	1	1	3	3	3	3		Cc1ccc(N(C)C)cc1	C9H13N	135.2	2.81	5.511	-2.701	0.26
64741-63-5	naphtha (petroleum), light catalytic reformed;naphtha, petroleum, light catalytic reformed;naphtha (petroleum), light catalytic reformed naphtha, petroleum, light catalytic reformed	NO	NO	10	NO	NO	6	TRUE	3	10	High		FALSE	169	34.5	YES	YES	TRUE	TRUE	329	251		HARMON	CARC-MUTA					1	1	1	1	1	1	1	1	3	1	3	1		c1ccccc1	C6H6	78.107	2.13	4	-1.87	1.54
68475-70-7	aromatic hydrocarbons, c6-8, naphtha-raffinate pyrolyzate-derived;aromatic hydrocarbons, c6-8, naphtha raffinate pyrolyzate derived;aromatic hydrocarbons, c6-8, naphtha-raffinate pyrolyzate derived;aromatic hydrocarbons, c6-8, naphtha-raffinate pyrolyzate-derived aromatic hydrocarbons, c6-8, naphtha raffinate pyrolyzate derived aromatic hydrocarbons, c6-8, naphtha-raffinate pyrolyzate derived	NO	NO	10	NO	NO	6	TRUE	3	10	High		FALSE	169	34.5	YES	YES	TRUE	TRUE	329	251		HARMON	CARC-MUTA					1	1	1	1	1	1	1	1	3	1	3	1		c1ccccc1	C6H6	78.107	2.13	4	-1.87	1.54
68955-35-1	naphtha (petroleum), catalytic reformed;naphtha, petroleum, catalytic reformed;naphtha (petroleum), catalytic reformed naphtha, petroleum, catalytic reformed	NO	NO	10	NO	NO	6	TRUE	3	10	High		FALSE	169	34.5	YES	YES	TRUE	TRUE	329	251		HARMON	CARC-MUTA					1	1	1	1	1	1	1	1	3	1	3	1		c1ccccc1	C6H6	78.107	2.13	4	-1.87	1.54
71-43-2	benzene;benzene*;benzene, pure;benzene benzene* benzene, pure	NO	NO	10	NO	NO	6	TRUE	3	10	High		FALSE	169	34.5	YES	YES	TRUE	TRUE	329	251		HARMON	CARC-MUTA-STOT RE					1	1	1	1	1	1	1	1	3	1	3	1		c1ccccc1	C6H6	78.107	2.13	4	-1.87	1.54
110-86-1	pyridine	NO	NO	7	NO	NO	8	TRUE	3	10	High		FALSE	165	32.5	YES	YES	TRUE	TRUE	344	266		IARC	CARC					1	1	1	1	1	1	1	1	3	1	3	1		c1ccccn1	C5H5N	79.096	0.65	4	-3.35	0.0776
96-49-1	ethylene carbonate;1,3-dioxolan-2-one;carbonic acid, ethylene(cyclic) ester;carbonic acid, cyclic ethylene ester;ethylene carbonate 1,3-dioxolan-2-one carbonic acid, ethylene(cyclic) ester carbonic acid, cyclic ethylene ester	NO	NO	7	NO	NO	8	TRUE	3	10	High		FALSE	165	32.5	YES	YES	TRUE	TRUE	344	266		JOINT	STOT RE					1	1	1	1	3	1	1	1	3	1	3	1		O=C1OCCO1	C3H4O3	88.059	-0.34	4	-4.34	0.0212
68477-87-2	gases (petroleum), deisobutanizer tower overheads;gases, petroleum, deisobutanizer tower overheads;gases(petroleum),deisobutanisertower overheads,iftheycontain>0,1%w/w butadiene;gases (petroleum), deisobutanizer tower overheads gases, petroleum, deisobutanizer tower overheads gases(petroleum),deisobutanisertower overheads,iftheycontain>0,1%w/w butadiene	NO	NO	8	NO	NO	8	TRUE	1	10	High		FALSE	165	32.5	YES	YES	TRUE	TRUE	344	266		HARMON	CARC-MUTA					1	1	1	1	1	1	1	1	1	1	1	1		CC(C)C	C4H10	58.119	2.76	4	-1.24	0.508
108-80-5	cyanuric acid;1,3,5-triazine-2,4,6(1h,3h,5h)-trione;isocyanuric acid;s-triazine-2,4,6(1h,3h,5h)-trione;cyanuric acid (isocyanuric acid) (1,3,5-triazine-2,4,6(1h,3h,5h)-trione) (s-triazinetriol);cyanuric acid 1,3,5-triazine-2,4,6(1h,3h,5h)-trione isocyanuric acid s-triazine-2,4,6(1h,3h,5h)-trione cyanuric acid (isocyanuric acid) (1,3,5-triazine-2,4,6(1h,3h,5h)-trione) (s-triazinetriol)	NO	NO	8	NO	NO	8	TRUE	10	1	High		FALSE	165	8.2	YES	YES	TRUE	TRUE	344	488		not classified	not applicable		x	x	x	10	10	10	10	10	10	10	10	10	10	10	10		Oc1nc(O)nc(O)n1	C3H3N3O3	129.07	0.61	12	-11.39	0.000774
461-58-5	2-cyanoguanidine;cyanoguanidine;guanidine, cyano-;2-cyanoguanidine cyanoguanidine guanidine, cyano-	NO	NO	8	NO	NO	8	TRUE	10	1	High		FALSE	165	8.2	YES	YES	TRUE	TRUE	344	488		not classified	not applicable			x	x	3	3	6	6	10	6	6	6	10	6	10	6		NC(N)=NC#N	C2H4N4	84.08	-1.15	6.886	-8.036	0.00783
61788-89-4	fatty acids, c18-unsatd., dimers	NO	NO	8	NO	NO	8	TRUE	10	1	High		FALSE	165	8.2	YES	YES	TRUE	TRUE	344	488		not classified	not applicable		x	x		10	10	6	6	6	6	10	10	3	10	3	10		CCCCCCC1C=CC(CCCCCCCCO)C(C=CCCCCCCCCO)C1CCCCCC	C36H68O2	532.9	12	12	0	1300
67-68-5	dimethylsulfoxide;dimethylsulphoxide;dimethyl sulfoxide;methane, 1,1'-sulfinylbis-;methane, sulfinylbis-;dmso;dimethyl sulfoxide (dmso);sulfinyldimethane;dimethylsulfoxide(inn);sulfinyl bis(methane);methyl sulfoxide;dimethyl sulfoxide [usan:inn];dimethyl sulfoxide (dmso) (methane, sulfinylbis-) (methyl sulfoxide);sulfinylbis-methane (9ci);dimethylsulfoxide dimethylsulphoxide dimethyl sulfoxide me…	NO (Toxicity Score of 1 confirmed)	NO	8	NO	NO	8	TRUE	10	1	Low		FALSE	165	8.2	YES	YES	TRUE	TRUE	344	488		OTH-NO	CARC-MUTA-STOT RE			x		3	3	6	6	6	6	6	6	10	6	10	6		CS(C)=O	C2H6OS	78.13	-1.35	5.859	-7.209	0.0218
68515-73-1	d-glucopyranose, oligomeric, decyl octyl glycosides;d-glucose, decyl octyl ethers, oligomeric;d-glucopyranose, oligomers, decyl octyl glycosides;d-glucopyranose, oligomeric, c8-10 glycosides;d-glucopyranose, oligomeric, decyl octyl glycosides d-glucose, decyl octyl ethers, oligomeric d-glucopyranose, oligomers, decyl octyl glycosides d-glucopyranose, oligomeric, c8-10 glycosides	NO	NO	8	NO	NO	8	TRUE	10	1	High		FALSE	165	8.2	YES	YES	TRUE	TRUE	344	488		not classified	not applicable		x	x	x	10	10	10	10	10	10	10	10	10	10	10	10		CCCCCCCCCCOC1C(O)C(O)C(O)C(COC2C(O)C(O)C(O)C(CO)O2)O1	C22H42O11	482.54	-0.58	12	-12.58	0.00175
102-08-9	n,n-diphenylthiourea;thiocarbanilide;diphenylthiourea;thiourea, n,n’-diphenyl-;1,3-diphenyl-2-thiourea;1,3-diphenylthiourea;thiourea, n,n'-diphenyl-;carbanilide, thio-;n,n'-diphenylthiourea;n,n-diphenylthiourea thiocarbanilide diphenylthiourea thiourea, n,n’-diphenyl- 1,3-diphenyl-2-thiourea 1,3-diphenylthiourea thiourea, n,n'-diphenyl- carbanilide, thio- n,n'-diphenylthiourea	YES (Step 1)	NO	2.75	NO	NO	10	TRUE	6	10	High		TRUE	163.5	31.75	YES	YES	TRUE	TRUE	352	269		JOINT	REPR-STOT RE					6	6	6	6	6	6	6	6	6	3	6	6		S=C(Nc1ccccc1)Nc1ccccc1	C13H12N2S	228.3	3.21	8.916	-5.706	0.0744
1025-15-6	triallyl isocyanurate;1,3,5-triazine-2,4,6(1h,3h,5h)-trione, 1,3,5-tri-2-propen-1-yl-;1,3,5-triazine-2,4,6(1h,3h,5h)-trione, 1,3,5-tri;1,3,5-tris(2-propenyl)isocyanuric acid;1,3,5-triazine-2,4,6(1h,3h,5h)-trione, 1,3,5-tri-2-propenyl-;1,3,5-triallyl-1,3,5-triazine-2,4,6(1h,3h,5h)-trione;1,3,5-tri(prop-2-en-1-yl)-1,3,5-triazinane-2,4,6-trione;s-triazine-2,4,6(1h,3h,5h)-trione, 1,3,5-triallyl-;s-tr…	YES (Step 1)	NO	2.75	NO	NO	10	TRUE	6	10	High		TRUE	163.5	31.75	YES	YES	TRUE	TRUE	352	269		JOINT	STOT RE					6	6	6	6	3	6	3	3	6	3	6	3		C=CCN1C(=O)N(CC=C)C(=O)N(CC=C)C1=O	C12H15N3O3	249.26	5.12	12	-6.88	0.000394
51240-95-0	neodecaneperoxoic acid, 1,1,3,3-tetramethylbutyl ester;1,1,3,3-tetramethylbutyl peroxyneodecanoate;reaction products of neodecanoic acid (or neodecanoyl chloride derived from neodecanoic acid) and 1,1,3,3-tetramethylbutyl hydroperoxide;neodecaneperoxoic acid, 1,1,3,3-tetramethylbutyl ester 1,1,3,3-tetramethylbutyl peroxyneodecanoate reaction products of neodecanoic acid (or neodecanoyl chloride d…	YES (Step 1)	NO	2.75	NO	NO	10	TRUE	6	10	High		TRUE	163.5	31.75	YES	YES	TRUE	TRUE	352	269		JOINT	REPR					6	6	6	6	6	6	6	6	1	6	1	6		CCCCCCCCCC(=O)OOC(C)(C)CC(C)(C)C	C18H36O3	300.46	7.22	7.116	0.104	10.9
62-53-3	aniline;benzenamine;phenylamine;aniline,itssaltsanditshalogenatedandsulphonatedderivatives;benzeneamine;aminobenzene;aniline benzenamine phenylamine aniline,itssaltsanditshalogenatedandsulphonatedderivatives benzeneamine aminobenzene	NO	NO	5.3	NO	NO	10	TRUE	3	10	High		FALSE	162	31	YES	YES	TRUE	TRUE	355	272		HARMON	CARC-MUTA-STOT RE					3	3	1	1	1	1	1	1	3	1	3	3		Nc1ccccc1	C6H7N	93.122	0.9	4.983	-4.083	0.0326
634-93-5	2,3,6-trichloroaniline;2,4,6-trichloroaniline;benzenamine, 2,4,6-trichloro-;aniline, 2,4,6-trichloro-;2,3,6-trichloroaniline 2,4,6-trichloroaniline benzenamine, 2,4,6-trichloro- aniline, 2,4,6-trichloro-	YES (Step 1)	NO	2.5	NO	NO	10	TRUE	6	10	High		TRUE	161	30.5	YES	YES	TRUE	TRUE	356	273		JOINT	STOT RE					6	6	6	6	6	6	6	6	6	6	6	6		Nc1c(Cl)cc(Cl)cc1Cl	C6H4Cl3N	196.46	3.52	8.019	-4.499	0.979
100-44-7	benzyl chloride (a-chlorotoluene);benzyl chloride;benzene, (chloromethyl)-;alpha-chlorotoluene;±-chlorotoluene;(chloromethyl)benzene;?-chlorotoluene;?chlorotoluene(benzylchloride);toluene, .alpha.-chloro-;chloromethyl benzene;α-chlorotoluene;(alpha)-chlorotoluene;a-chlorotoluene;benzyl chloride (a-chlorotoluene) benzyl chloride benzene, (chloromethyl)- alpha-chlorotoluene ±-chlorotoluene (chlorom…	NO	NO	6	NO	NO	10	TRUE	1	10	High		FALSE	161	30.5	YES	YES	TRUE	TRUE	356	273		HARMON	CARC-STOT RE					1	1	1	1	1	1	1	1	1	1	1	1		ClCc1ccccc1	C7H7Cl	126.58	2.3	4.074	-1.774	0.148
68411-20-1	butanal, reaction products with aniline	NO	NO	6	NO	NO	10	TRUE	1	10	High		FALSE	161	30.5	YES	YES	TRUE	TRUE	356	273		JOINT	STOT RE					1	1	1	1	1	1	1	1	1	1	1	1		CCCC=Nc1ccccc1	C10H13N	147.21	2.97	4	-1.03	0.251
765-63-9	2,2,3,3-tetrafluorooxetane;tfo;2,2,3,3-tetrafluorooxetane tfo	NO	NO	6	NO	YES	10	TRUE	1	10	Low (affected by impurity)		FALSE	161	30.5	YES	YES	TRUE	TRUE	356	273		INDIV	CARC					1	1	1	1	1	1	1	1	1	1	1	1		FC1(F)COC1(F)F	C3H2F4O	130.04	1.95	4	-2.05	0.203
97-74-5	bis(dimethylthiocarbamyl)sulfide;tetramethylthiuram monosulfide;tetramethylthiuram;thiodicarbonic diamide ([(h2n)c(s)]2s), tetramethyl-;tetramethylthiuram monosulphide;n,n,n',n'-tetramethyldicarbonotrithioic diamide;thiurammonosulphides;thiodicarbonic diamide, tetramethyl-;sulfide, bis(dimethylthiocarbamoyl);thiodicarbonic diamide, (Х(h2n)c(s)е2s), tetramethyl-;thiodicarbonic diamide (((h2n)c(s))…	NO	NO	6	NO	NO	10	TRUE	1	10	High		FALSE	161	30.5	YES	YES	TRUE	TRUE	356	273		JOINT	STOT RE					1	1	1	1	1	1	1	1	1	1	1	1		CN(C)C(=S)SC(=S)N(C)C	C6H12N2S3	208.36	0.75	4	-3.25	0.00386
5307-14-2	2-nitro-p-phenylenediamine;2-nitro-1,4-phenylenediamine;2-nitro-p-phenylenediamine [2-nitro-1,4-phenylenediamine];2-nitro-1,4-phenylendiamine;2-nitro-4-phenylenediamine;nitro-p-phenylenediamine, 2-;1,4-benzenediamine, 2-nitro-;2-nitrobenzene-1,4-diamine;2nitropphenylenediamine anditssalts,whenusedas asubstanceinhairdye products;p-phenylenediamine, 2-nitro-;nitro-p-phenylene-diamine;2-nitro-1,4-ph…	NO (Toxicity Score of 10 not confirmed)	NO	6	NO	NO	10	TRUE	10	1	Low		FALSE	161	8	YES	YES	TRUE	TRUE	356	493		OTH-YES	CARC-MUTA			x	x	6	6	10	10	10	10	10	10	10	6	10	10		Nc1ccc(N)cc1N(=O)=O	C6H7N3O2	153.13	0.53	9.154	-8.624	0.0101
2387-03-3	1-naphthalenecarboxaldehyde, 2-hydroxy-, [(2-hydroxy-1-naphthalenyl)methylene]hydrazone;2-hydroxynaphthalene-1-carbaldehyde [(2-hydroxy-1-naphthyl)methylene]hydrazone;1,1'-(hydrazine-1,2-diylidenedimethylylidene)dinaphthalen-2-ol;1-naphthalenecarboxaldehyde, 2-hydroxy-, (2-hydroxy-1-naphthalenyl)methylene hydrazone;1-naphthaldehyde, 2-hydroxy-, azine;1-naphthalenecarboxaldehyde, 2-hydroxy-, Х(2-h…	NO	NO	6	NO	NO	10	TRUE	10	1	High		FALSE	161	8	YES	YES	TRUE	TRUE	356	493		not classified	not applicable		x		x	10	10	10	10	10	10	3	6	6	6	6	6		Oc1ccc2ccccc2c1C=NN=Cc1c2ccccc2ccc1O	C22H16N2O2	340.36	7.87	12	-4.13	0.77
3081-01-4	1,4-benzenediamine, n-(1,4-dimethylpentyl)-n’-phenyl-;n-(1,4-dimethylpentyl)-n'-phenylbenzene-1,4-diamine;1,4-benzenediamine, n-(1,4-dimethylpentyl)-n'-phenyl-;n-(5-methylhexan-2-yl)-n'-phenylbenzene-1,4-diamine;p-phenylenediamine, n-(1,4-dimethylpentyl)-n'-phenyl-;phenylenediamine;1,4-benzenediamine, n-(1,4-dimethylpentyl)-n’-phenyl- n-(1,4-dimethylpentyl)-n'-phenylbenzene-1,4-diamine 1,4-benzen…	NO	NO	6	NO	NO	10	TRUE	10	1	High		FALSE	161	8	YES	YES	TRUE	TRUE	356	493		not classified	not applicable		x	x	x	10	10	10	10	10	10	10	10	10	10	10	10		CC(C)CCC(C)Nc1ccc(Nc2ccccc2)cc1	C19H26N2	282.41	5.17	11.909	-6.739	1.23
6992-11-6	4-[(2,5-dichlorophenyl)diazenyl]-3-hydroxy-n-(2-oxo-2,3-dihydro-1h-benzimidazol-5-yl)naphthalene-2-carboxamide	NO	NO	6	NO	YES	10	TRUE	10	1	High		FALSE	161	8	YES	YES	TRUE	TRUE	356	493		not classified	not applicable		x	x	x	10	10	10	10	10	10	6	6	6	10	6	6		Oc1c(C(=O)Nc2ccc3c(c2)NC(O)=N3)cc2ccccc2c1N=Nc1cc(Cl)ccc1Cl	C24H15Cl2N5O3	492.3	8.09	12	-3.91	1.27
10081-67-1	benzenamine, 4-(1-methyl-1-phenylethyl)-n-[4-(1-methyl-1-phenylethyl)phenyl]-;4-(1-methyl-1-phenylethyl)-n-[4-(1-methyl-1-phenylethyl)phenyl]aniline;4-(2-phenylpropan-2-yl)-n-[4-(2-phenylpropan-2-yl)phenyl]aniline;benzenamine, 4-(1-methyl-1-phenylethyl)-n- 4-(1-methyl-1-phenylethyl)phenyl -;diphenylamine, 4,4'-bis(.alpha.,.alpha.-dimethylbenzyl)-;benzenamine, 4-(1-methyl-1-phenylethyl)-n-Х4-(1-me…	NO	NO	6	NO	NO	10	TRUE	10	1	High		FALSE	161	8	YES	YES	TRUE	TRUE	356	493		not classified	not applicable		x	x	x	10	10	10	10	10	10	10	10	6	10	6	10		CC(C)(c1ccccc1)c1ccc(Nc2ccc(C(C)(C)c3ccccc3)cc2)cc1	C30H31N	405.55	8.51	12	-3.49	103
101-20-2	urea, n-(4-chlorophenyl)-n'-(3,4-dichlorophenyl)-;triclocarban;urea, n-(4-chlorophenyl)-n’-(3,4-dichlorophenyl)-;1-(4-chlorophenyl)-3-(3,4-dichlorophenyl)urea;3,4,4'-trichlorocarbanilide;carbanilide, 3,4,4'-trichloro-;trichlorocarbanilide;n-(4-chlorophenyl)-n'-(3,4-dichlorophenyl)urea;triclocarban (urea, n-(4-chlorophenyl)-n'-(3,4-dichlorophenyl)-);urea, n-(4-chlorophenyl)-n'-(3,4-dichlorophenyl)…	NO	NO	6	NO	NO	10	TRUE	10	1	High		FALSE	161	8	YES	YES	TRUE	TRUE	356	493		not classified	not applicable		x	x	x	10	10	10	10	10	10	10	10	10	10	10	10		O=C(Nc1ccc(Cl)cc1)Nc1ccc(Cl)c(Cl)c1	C13H9Cl3N2O	315.57	4.9	12	-7.1	1.12
10191-41-0	dl-alpha-tocopherol;2h-1-benzopyran-6-ol, 3,4-dihydro-2,5,7,8-tetramethyl-2-(4,8,12-trimethyltridecyl)-;3,4-dihydro-2,5,7,8-tetramethyl-2-(4,8,12-trimethyltridecyl)-2h-benzopyran-6-ol;2,5,7,8-tetramethyl-2-(4,8,12-trimethyltridecyl)-3,4-dihydro-2h-chromen-6-ol;2h-1-benzopyran-6-ol, 3,4-dihydro-2,5,7,8-tetramethyl-2-(4,8,12-trimethyltridecyl)-, 2r- 2r*(4r*,8r*) -;6-chromanol, 2,5,7,8-tetramethyl-2…	NO	NO	6	NO	NO	10	TRUE	10	1	High		FALSE	161	8	YES	YES	TRUE	TRUE	356	493		not classified	not applicable			x		6	6	3	3	3	6	10	10	1	10	3	10		CC(C)CCCC(C)CCCC(C)CCCC1(C)CCc2c(C)c(O)c(C)c(C)c2O1	C29H50O2	430.68	12	12	0	25.7
102-77-2	n-oxydiethylene-2-benzothiazylsulfenamide;n-oxydiethylenebenzothiazole-2-sulfenamide;morpholine, 4-(2-benzothiazolylthio)-;2-(morpholinothio)benzothiazole;2-(morpholin-4-ylsulfanyl)-1,3-benzothiazole;benzothiazole, 2-(morpholinothio)-;n-oxydiethylene-2-benzothiazylsulfenamide n-oxydiethylenebenzothiazole-2-sulfenamide morpholine, 4-(2-benzothiazolylthio)- 2-(morpholinothio)benzothiazole 2-(morpho…	NO	NO	6	NO	NO	10	TRUE	10	1	High		FALSE	161	8	YES	YES	TRUE	TRUE	356	493		not classified	not applicable		x	x	x	10	10	10	10	10	10	10	10	10	10	10	10		C1CN(SC2=Nc3ccccc3S2)CCO1	C11H12N2OS2	252.35	1.02	10.673	-9.653	0.0346
10591-85-2	thioperoxydicarbonic diamide([(h2n)c(s)]2s2), tetrakis(phenylmethyl)-;tetrakis(phenylmethyl)thioperoxydi(carbothioamide);thioperoxydicarbonic diamide ([(h2n)c(s)]2s2), n,n,n',n'-tetrakis(phenylmethyl)-;tetrabenzylthiuramdisulfide;thioperoxydicarbonic diamide([(h2n)c(s)]2s2), tetrakis(phenylmethyl)- tetrakis(phenylmethyl)thioperoxydi(carbothioamide) thioperoxydicarbonic diamide ([(h2n)c(s)]2s2), n…	NO	NO	6	NO	NO	10	TRUE	10	1	High		FALSE	161	8	YES	YES	TRUE	TRUE	356	493		not classified	not applicable		x			10	10	6	6	6	6	6	6	6	6	6	6		S=C(N(Cc1ccccc1)Cc1ccccc1)SSC(=S)N(Cc1ccccc1)Cc1ccccc1	C30H28N2S4	544.79	8.53	12	-3.47	0.352
106276-78-2	benzoic acid, 2,3,4,5-tetrachloro-6-cyano-, methyl ester, reaction products with 4-[(4-aminophenyl)azo]-3-methylbenzenamine and sodium methoxide	NO	NO	6	NO	NO	10	TRUE	10	1	High		FALSE	161	8	YES	YES	TRUE	TRUE	356	493		not classified	not applicable		x	x	x	10	10	10	10	10	10	10	10	10	10	10	10		Cc1cc(NC(=O)c2c(C#N)c(Cl)c(Cl)c(Cl)c2Cl)ccc1N=Nc1ccc(N)cc1	C21H13Cl4N5O	493.16	6.57	12	-5.43	4.7
106276-79-3	benzoic acid, 2,3,4,5-tetrachloro-6-cyano-, methyl ester, reaction products with 2-methyl-1,3-benzenediamine and sodium methoxide;benzoic acid, 2,3,4,5-tetrachloro-6-cyano-, methyl ester, reaction products with 2-methyl-1,3-benzenediamine and sodiummethoxide;benzoic acid, 2,3,4,5-tetrachloro-6-cyano-, methyl ester, reaction products with 2-methyl-1,3-benzenediamine and sodium methoxide benzoic ac…	NO	NO	6	NO	NO	10	TRUE	10	1	High		FALSE	161	8	YES	YES	TRUE	TRUE	356	493		not classified	not applicable		x	x	x	10	10	10	10	10	10	10	10	10	10	10	10		Cc1c(NC(=O)c2c(C#N)c(Cl)c(Cl)c(Cl)c2Cl)cccc1N	C15H9Cl4N3O	389.05	3.89	12	-8.11	0.3
106276-80-6	benzoic acid, 2,3,4,5-tetrachloro-6-cyano-, methyl ester, reaction products with p-phenylenediamine and sodium methoxide	NO	NO	6	NO	NO	10	TRUE	10	1	High		FALSE	161	8	YES	YES	TRUE	TRUE	356	493		not classified	not applicable		x	x	x	10	10	10	10	10	10	10	10	10	10	10	10		Nc1ccc(NC(=O)c2c(C#N)c(Cl)c(Cl)c(Cl)c2Cl)cc1	C14H7Cl4N3O	375.03	3.91	12	-8.09	0.494
107065-85-0	3,4-dihydroxyphenyl 4-methylphenyl sulfone;3,4-dihydroxyphenyl-p-tolylsulfone;4-(p-tolylsulfonyl)benzene-1,2-diol;4-(p-tosyl)catechol;3,4-dihydroxyphenyl 4-methylphenyl sulfone 3,4-dihydroxyphenyl-p-tolylsulfone 4-(p-tolylsulfonyl)benzene-1,2-diol 4-(p-tosyl)catechol	NO	NO	6	NO	NO	10	TRUE	10	1	High		FALSE	161	8	YES	YES	TRUE	TRUE	356	493		not classified	not applicable		x	x	x	10	10	10	10	10	10	10	10	10	10	10	10		Cc1ccc(S(=O)(=O)c2ccc(O)c(O)c2)cc1	C13H12O4S	264.28	2.19	12	-9.81	0.0411
1071-93-8	hexanedioic acid, 1,6-dihydrazide;adipohydrazide;hexanedihydrazide;hexanedioic acid, dihydrazide;adipic acid, dihydrazide;hexanedioic acid, 1,6-dihydrazide adipohydrazide hexanedihydrazide hexanedioic acid, dihydrazide adipic acid, dihydrazide	NO	NO	6	NO	NO	10	TRUE	10	1	High		FALSE	161	8	YES	YES	TRUE	TRUE	356	493		not classified	not applicable		x	x	x	10	10	10	10	10	10	10	10	10	10	10	10		NNC(=O)CCCCC(=O)NN	C6H14N4O2	174.2	-2	11.937	-13.937	0.00236
111-01-3	squalene;tetracosane, 2,6,10,15,19,23-hexamethyl-;2,6,10,15,19,23-hexamethyltetracosane;squalene tetracosane, 2,6,10,15,19,23-hexamethyl- 2,6,10,15,19,23-hexamethyltetracosane	NO	NO	6	NO	NO	10	TRUE	10	1	High		FALSE	161	8	YES	YES	TRUE	TRUE	356	493		not classified	not applicable			x		6	6	3	6	6	6	10	10	1	10	1	10		CC(C)CCCC(C)CCCC(C)CCCCC(C)CCCC(C)CCCC(C)C	C30H62	422.79	12	9.834	2.166	1190
1122460-01-8	(1r,2s,5r)-5-methyl-2-(propan-2-yl)cyclohexyl (ethylamino)(oxo)acetate	NO	NO	6	NO	NO	10	TRUE	10	1	High		FALSE	161	8	YES	YES	TRUE	TRUE	356	493		not classified	not applicable			x		6	6	6	6	6	6	6	6	10	6	10	6		CCNC(=O)C(=O)OC1CC(C)CCC1C(C)C	C14H25NO3	255.34	2.86	9.835	-6.975	0.0296
117-80-6	2,3-dichloro-1,4-napthalenedione;1,4-naphthalenedione, 2,3-dichloro-;2,3-dichloro-1,4-naphthoquinone;dichlone;1,4-naphthoquinone, 2,3-dichloro-;2,3-dichloro-1,4-naphthalenedione;dichlone (2,3-dichloro-1,4-naphthoquinone);2,3-dichloro-1,4-napthalenedione 1,4-naphthalenedione, 2,3-dichloro- 2,3-dichloro-1,4-naphthoquinone dichlone 1,4-naphthoquinone, 2,3-dichloro- 2,3-dichloro-1,4-naphthalenedione …	NO	NO	6	NO	NO	10	TRUE	10	1	High		FALSE	161	8	YES	YES	TRUE	TRUE	356	493		not classified	not applicable		x	x	x	10	10	10	10	10	10	10	10	10	10	10	10		O=C1c2ccccc2C(=O)C(Cl)=C1Cl	C10H4Cl2O2	227.04	2.65	10.03	-7.38	1.55
118-82-1	phenol, 4,4'-methylenebis[2,6-bis(1,1-dimethylethyl)-;4,4'-methylenebis(2,6-di-tert-butylphenol);4,4'-methylenebis(2,6-di-t-butylphenol);4,4-methylene bis-(2,6-di-tert-butyl phenol);phenol, 4,4’-methylenebis[2,6-bis(1,1-dimethylethyl)-;2,2',6,6'-tetra-tert-butyl-4,4'-methylenediphenol;4,4'-methanediylbis(2,6-di-tert-butylphenol);phenol, 4,4'-methylenebis 2,6-bis(1,1-dimethylethyl)-;4,4'-methylene…	NO	NO	6	NO	NO	10	TRUE	10	1	High		FALSE	161	8	YES	YES	TRUE	TRUE	356	493		not classified	not applicable		x	x	x	10	10	10	10	10	10	10	10	6	10	6	10		CC(C)(C)c1cc(Cc2cc(C(C)(C)C)c(O)c(C(C)(C)C)c2)cc(C(C)(C)C)c1O	C29H44O2	424.64	8.99	12	-3.01	9.81
118832-72-7	acetic acid, [[[3,5-bis(1,1-dimethylethyl)-4-hydroxyphenyl]methyl]thio]-, c10-14-isoalkyl esters;iso(c10-c14)alkyl (3,5-di-tert-butyl-4-hydroxyphenyl)methylthioacetate;acetic acid, [[[3,5-bis(1,1-dimethylethyl)-4-hy*;acetic acid, [[[3,5-bis(1,1-dimethylethyl)-4-hydroxyphenyl]methyl]thio]-, c10-14-isoalkyl esters iso(c10-c14)alkyl (3,5-di-tert-butyl-4-hydroxyphenyl)methylthioacetate acetic acid, […	NO	NO	6	NO	NO	10	TRUE	10	1	High		FALSE	161	8	YES	YES	TRUE	TRUE	356	493		not classified	not applicable		x	x		10	10	6	6	6	6	6	6	6	10	6	6		CC(C)CCCCCCCOC(=O)CSCc1cc(C(C)(C)C)c(O)c(C(C)(C)C)c1	C27H46O3S	450.69	9	12	-3	0.945
120-46-7	1,3-propanedione, 1,3-diphenyl-;1,3-diphenylpropane-1,3-dione;1,3-diphenyl-1,3-propanedione;1,3-propanedione, 1,3-diphenyl- 1,3-diphenylpropane-1,3-dione 1,3-diphenyl-1,3-propanedione	NO	NO	6	NO	NO	10	TRUE	10	1	High		FALSE	161	8	YES	YES	TRUE	TRUE	356	493		not classified	not applicable		x	x	x	6	10	10	10	10	10	6	6	10	6	10	10		O=C(CC(=O)c1ccccc1)c1ccccc1	C15H12O2	224.24	2.51	9.781	-7.271	0.0845
121-60-8	4-(acetylamino)benzenesulfonyl chloride;p-acetamidobenzenesulfonyl chloride;benzenesulfonyl chloride, 4-(acetylamino)-;n-acetylsulphanilyl chloride;sulfanilyl chloride, n-acetyl-;4-acetamidobenzenesulfonyl chloride;p-（acetylamino）benzenesulfonyl chloride;4-(acetylamino)benzenesulfonyl chloride p-acetamidobenzenesulfonyl chloride benzenesulfonyl chloride, 4-(acetylamino)- n-acetylsulphanilyl chlor…	NO	NO	6	NO	NO	10	TRUE	10	1	High		FALSE	161	8	YES	YES	TRUE	TRUE	356	493		not classified	not applicable		x	x	x	10	10	10	10	10	10	10	10	10	10	10	10		CC(=O)Nc1ccc(S(=O)(=O)Cl)cc1	C8H8ClNO3S	233.66	2.05	11.438	-9.388	0.0604
12225-08-0	2-naphthalenecarboxamide, n-(2,3-dihydro-2-oxo-1h-benzimidazol-5-yl)-4-[[2,5-dimethoxy-4-[(methylamino)sulfonyl]phenyl]azo]-3-hydroxy-;n-(2,3-dihydro-2-oxo-1h-benzimidazol-5-yl)-3-hydroxy-4-[[2,5-dimethoxy-4-[(methylamino)sulphonyl]phenyl]azo]naphthalene-2-carboxamide;4-{[2,5-dimethoxy-4-(methylsulfamoyl)phenyl]diazenyl}-3-hydroxy-n-(2-oxo-2,3-dihydro-1h-benzimidazol-5-yl)naphthalene-2-carboxamid…	NO	NO	6	NO	YES	10	TRUE	10	1	High		FALSE	161	8	YES	YES	TRUE	TRUE	356	493		not classified	not applicable		x	x	x	10	10	10	10	10	10	6	6	10	6	10	6		CNS(=O)(=O)c1cc(OC)c(N=Nc2c3ccccc3cc(C(=O)Nc3ccc4c(c3)N=C(O)N4)c2O)cc1OC	C27H24N6O7S	576.56	5.81	12	-6.19	0.0575
12225-18-2	butanamide, n-(4-chloro-2,5-dimethoxyphenyl)-2-[[2,5-dimethoxy-4-[(phenylamino)sulfonyl]phenyl]azo]-3-oxo-;n-(4-chloro-2,5-dimethoxyphenyl)-2-[[2,5-dimethoxy-4-[(phenylamino)sulphonyl]phenyl]azo]-3-oxobutyramide;n-(4-chloro-2,5-dimethoxyphenyl)-2-{[2,5-dimethoxy-4-(phenylsulfamoyl)phenyl]diazenyl}-3-oxobutanamide;butanamide, n-(4-chloro-2,5-dimethoxyphenyl)-2- 2,5-dimethoxy-4- (phenylamino)sulfon…	NO	NO	6	NO	YES	10	TRUE	10	1	High		FALSE	161	8	YES	YES	TRUE	TRUE	356	493		not classified	not applicable		x	x	x	10	10	10	10	10	10	10	10	10	10	10	10		CC(=O)C(C(=O)Nc1cc(OC)c(Cl)cc1OC)N=Nc1cc(OC)c(S(=O)(=O)Nc2ccccc2)cc1OC	C26H27ClN4O8S	591.01	4.04	12	-7.96	0.695
12236-62-3	butanamide, 2-[(4-chloro-2-nitrophenyl)azo]-n-(2,3-dihydro-2-oxo-1h-benzimidazol-5-yl)-3-oxo-;2-[(4-chloro-2-nitrophenyl)azo]-n-(2,3-dihydro-2-oxo-1h-benzimidazol-5-yl)-3-oxobutyramide;2-[(4-chloro-2-nitrophenyl)diazenyl]-3-oxo-n-(2-oxo-2,3-dihydro-1h-benzimidazol-5-yl)butanamide;butanamide, 2-[(4-chloro-2-nitrophenyl)azo]-n-(2,3-dihydro-2-oxo-1h-benzimidazol-5-yl)-3-oxo- 2-[(4-chloro-2-nitrophen…	NO	NO	6	NO	NO	10	TRUE	10	1	High		FALSE	161	8	YES	YES	TRUE	TRUE	356	493		not classified	not applicable		x	x	x	10	10	10	10	10	10	10	10	10	6	10	10		CC(=O)C(C(=O)Nc1ccc2c(c1)N=C(O)N2)N=Nc1ccc(Cl)cc1N(=O)=O	C17H13ClN6O5	416.76	3.55	12	-8.45	0.0173
12236-64-5	2-naphthalenecarboxamide, n-[4-(acetylamino)phenyl]-4-[[5-(aminocarbonyl)-2-chlorophenyl]azo]-3-hydroxy-;n-[4-(acetylamino)phenyl]-4-[[5-(aminocarbonyl)-2-chlorophenyl]azo]-3-hydroxynaphthalene-2-carboxamide;n-[4-(acetylamino)phenyl]-4-[(5-carbamoyl-2-chlorophenyl)diazenyl]-3-hydroxynaphthalene-2-carboxamide;2-naphthalenecarboxamide, n- 4-(acetylamino)phenyl -4- 5-(aminocarbonyl)-2-chlorophenyl a…	NO	NO	6	NO	YES	10	TRUE	10	1	High		FALSE	161	8	YES	YES	TRUE	TRUE	356	493		not classified	not applicable		x	x	x	10	10	10	10	10	10	6	6	10	6	10	6		CC(=O)Nc1ccc(NC(=O)c2cc3ccccc3c(N=Nc3cc(C(N)=O)ccc3Cl)c2O)cc1	C26H20ClN5O4	501.9	5.79	12	-6.21	0.0864
1231148-36-9	14,14',15,15'-tetradehydro-7,7'-spirobi[dibenzo[b,g][1,9,4,6]dioxadiazacyclododecine]	NO	NO	6	NO	YES	10	TRUE	10	1	High		FALSE	161	8	YES	YES	TRUE	TRUE	356	493		not classified	not applicable		x	x	x	10	10	10	10	10	10	10	10	10	10	10	10		C1C2(COc3ccccc3N=C=Nc3ccccc3O1)COc1ccccc1N=C=Nc1ccccc1OC2	C31H24N4O4	516.52	5.93	12	-6.07	31.8
1238449-42-7	carbonic acid, bis (2-propylheptyl) ester	NO	NO	6	NO	NO	10	TRUE	10	1	High		FALSE	161	8	YES	YES	TRUE	TRUE	356	493		not classified	not applicable			x		6	6	6	6	6	6	10	10	1	10	1	6		CCCCCC(CCC)COC(=O)OCC(CCC)CCCCC	C21H42O3	342.54	8.93	8.31	0.62	21.5
1261240-30-5	4-tert-butyl-2-(5-tert-butyl-2-oxo-2,3-dihydro-1-benzofuran-3-yl)phenyl 3,5-di-tert-butyl-4-hydroxybenzoate	NO	NO	6	NO	NO	10	TRUE	10	1	High		FALSE	161	8	YES	YES	TRUE	TRUE	356	493		not classified	not applicable		x	x		10	10	6	6	6	6	10	10	6	10	6	10		CC(C)(C)c1ccc(OC(=O)c2cc(C(C)(C)C)c(O)c(C(C)(C)C)c2)c(C2c3cc(C(C)(C)C)ccc3OC2=O)c1	C37H46O5	570.73	10.12	12	-1.88	8.38
128-69-8	perylo[3,4-cd:9,10-c’d’]dipyran-1,3,8,10-tetrone;perylene-3,4:9,10-tetracarboxylic dianhydride;isochromeno[4',5',6':6,5,10]anthra[2,1,9-def]isochromene-1,3,8,10-tetrone;perylo[3,4-cd:9,10-c'd']dipyran-1,3,8,10-tetrone;perylo 3,4-cd:9,10-c'd' dipyran-1,3,8,10-tetrone;3,4,9,10-perylenetetracarboxylic 3,4:9,10-dianhydride;peryloХ3,4-cd:9,10-c'd'еdipyran-1,3,8,10-tetrone;perylo[3,4-cd:9,10-c’d’]dipyr…	NO	NO	6	NO	NO	10	TRUE	10	1	High		FALSE	161	8	YES	YES	TRUE	TRUE	356	493		not classified	not applicable		x	x	x	10	10	10	10	10	10	6	6	10	6	10	6		O=C1c2ccc3c4ccc5c6c4c(ccc6C(=O)OC5=O)c4ccc(c2c34)C(=O)O1	C24H8O6	392.3	6.26	12	-5.74	0.736
130-26-7	iodochlorohydroxyquinoline;5-chloro-7-iodo-quinolin-8-ol;8-quinolinol, 5-chloro-7-iodo-;clioquinol;5-chloro-7-iodoquinolin-8-ol;iodochlorohydroxyquinoline 5-chloro-7-iodo-quinolin-8-ol 8-quinolinol, 5-chloro-7-iodo- clioquinol 5-chloro-7-iodoquinolin-8-ol	NO (Toxicity Score of 1 confirmed)	NO	6	NO	NO	10	TRUE	10	1	Low		FALSE	161	8	YES	YES	TRUE	TRUE	356	493		OTH-NO	REPR		x	x	x	10	10	10	10	10	10	10	10	10	10	10	10		Oc1c(I)cc(Cl)c2cccnc12	C9H5ClINO	305.49	3.47	12	-8.53	0.0597
131-57-7	2-hydroxy-4-methoxybenzophenone;methanone, (2-hydroxy-4-methoxyphenyl)phenyl-;benzophenone, 2-hydroxy-4-methoxy;oxybenzone;(2-hydroxy-4-methoxyphenyl)(phenyl)methanone;benzophenone, 2-hydroxy-4-methoxy-;(2-hydroxy-4-methoxyphenyl)phenylmethanone;2-hydroxy-4-methoxybenzophenone methanone, (2-hydroxy-4-methoxyphenyl)phenyl- benzophenone, 2-hydroxy-4-methoxy oxybenzone (2-hydroxy-4-methoxyphenyl)(ph…	NO (Toxicity Score of 1 confirmed)	NO	6	NO	NO	10	TRUE	10	1	Low		FALSE	161	8	YES	YES	TRUE	TRUE	356	493		OTH-NO	STOT RE		x	x		6	10	6	6	6	6	6	6	10	6	10	6		COc1ccc(C(=O)c2ccccc2)c(O)c1	C14H12O3	228.23	3.79	10.002	-6.212	0.173
13393-93-6	1-phenanthrenemethanol, tetradecahydro-1,4a-dimethyl-7-(1-methylethyl)-;tetradecahydro-7-isopropyl-1,4a-dimethylphenanthren-1-methanol;1-phenanthrenemethanol, tetradecahydro-1,4a-dimethyl-7-(1-methylethyl)-, (1r,4ar,4bs,10ar)-;abietan-18-ol;hydroabietylalcohol,whenusedasa fragranceingredient;abietyl alcohol, tetrahydro-;1-phenanthrenemethanol, tetradecahydro-1,4a-dimethyl-7-(1-methylethyl)- tetra…	NO	NO	6	NO	NO	10	TRUE	10	1	High		FALSE	161	8	YES	YES	TRUE	TRUE	356	493		not classified	not applicable		x	x	x	6	10	10	10	10	10	10	10	6	10	6	6		CC(C)C1CCC2C(C1)CCC1C2(C)CCCC1(C)CO	C20H36O	292.48	6.4	9.087	-2.687	20.1
135-57-9	benzamide, n,n’-(dithiodi-2,1-phenylene)bis-;n,n'-(disulfanediyldibenzene-2,1-diyl)dibenzamide;benzamide, n,n'-(dithiodi-2,1-phenylene)bis-;n,n'-dithiodi-o-phenylenedibenzamide;benzanilide, 2',2'''-dithiobis-;n,n'-(disulfanediyldi-2,1-phenylene)dibenzamide;2,2'-dibenzamidodiphenyldisulfide;benzamide, n,n’-(dithiodi-2,1-phenylene)bis- n,n'-(disulfanediyldibenzene-2,1-diyl)dibenzamide benzamide, n,…	NO	NO	6	NO	NO	10	TRUE	10	1	High		FALSE	161	8	YES	YES	TRUE	TRUE	356	493		not classified	not applicable		x	x	x	10	10	10	10	10	10	10	10	10	10	10	10		O=C(c1ccccc1)Nc1ccccc1SSc1ccccc1NC(=O)c1ccccc1	C26H20N2O2S2	456.56	4.59	12	-7.41	0.246
135590-91-9	mefenpyr-diethyl;1h-pyrazole-3,5-dicarboxylic acid, 1-(2,4-dichlorophenyl)-4,5-dihydro-5-methyl-, 3,5-diethyl ester;1-(2,4-dichlorophenyl)-4,5-dihydro-5-methyl-1h-pyrazole-3,5-dicarboxylic acid 3,5-diethyl ester;diethyl 1-(2,4-dichlorophenyl)-5-methyl-4,5-dihydro-1h-pyrazole-3,5-dicarboxylate;ae f107892;mefenpyr-diethyl 1h-pyrazole-3,5-dicarboxylic acid, 1-(2,4-dichlorophenyl)-4,5-dihydro-5-methy…	NO	NO	6	NO	NO	10	TRUE	10	1	High		FALSE	161	8	YES	YES	TRUE	TRUE	356	493		not classified	not applicable		x	x	x	10	10	10	10	10	10	10	10	10	6	10	6		CCOC(=O)C1CC(C)(C(=O)OCC)N(c2ccc(Cl)cc2Cl)N=1	C16H18Cl2N2O4	373.22	3.83	11.154	-7.324	0.0742
137658-79-8	2-(4,6-bis(2,4-dimethylphenyl)-1,3,5-triazin-2-yl)-5-(3-((2-ethylhexyl)oxy)-2-hydroxypropoxy)phenol	NO	NO	6	NO	NO	10	TRUE	10	1	High		FALSE	161	8	YES	YES	TRUE	TRUE	356	493		not classified	not applicable		x	x	x	10	10	10	10	10	10	6	6	10	6	10	6		CCCCC(CC)COCC(O)COc1ccc(-c2nc(-c3ccc(C)cc3C)nc(-c3ccc(C)cc3C)n2)c(O)c1	C36H45N3O4	583.73	6.21	12	-5.79	0.31
1391350-92-7	((3,4-bis(hexyloxy)phenyl)methanetriyl)tribenzene	NO	NO	6	NO	NO	10	TRUE	10	1	High		FALSE	161	8	YES	YES	TRUE	TRUE	356	493		not classified	not applicable		x	x		10	6	6	6	6	6	10	10	3	10	3	10		CCCCCCOc1ccc(C(c2ccccc2)(c2ccccc2)c2ccccc2)cc1OCCCCCC	C37H44O2	520.72	11.59	12	-0.41	213
1404190-37-9	((3-(sec-butyl)-4-(decyloxy)phenyl)methanetriyl)tribenzene	NO	NO	6	NO	NO	10	TRUE	10	1	High		FALSE	161	8	YES	YES	TRUE	TRUE	356	493		not classified	not applicable		x	x		10	6	6	6	6	6	10	10	3	10	3	10		CCCCCCCCCCOc1ccc(C(c2ccccc2)(c2ccccc2)c2ccccc2)cc1C(C)CC	C39H48O	532.77	12	12	0	748
147315-50-2	phenol, 2-(4,6-diphenyl-1,3,5-triazin-2-yl)-5-(hexyloxy)-;2-(4,6-diphenyl-1,3,5-triazine-2-yl)-5-[(hexyl)oxy]phenol;2-(4,6-diphenyl-1,3,5-triazin-2-yl)-5-((hexyl)oxy)phenol;2-(4,6-diphenyl-1,3,5-triazin-2-yl)-5-[(hexyl)oxy]-phenol;tka 40046;tinuvin 1577;phenol, 2-(4,6-diphenyl-1,3,5-triazin-2-yl)-5-(hexyloxy)- 2-(4,6-diphenyl-1,3,5-triazine-2-yl)-5-[(hexyl)oxy]phenol 2-(4,6-diphenyl-1,3,5-triazin…	NO	NO	6	NO	NO	10	TRUE	10	1	High		FALSE	161	8	YES	YES	TRUE	TRUE	356	493		not classified	not applicable		x	x	x	10	10	10	10	10	10	6	6	10	6	10	6		CCCCCCOc1ccc(-c2nc(-c3ccccc3)nc(-c3ccccc3)n2)c(O)c1	C27H27N3O2	425.5	6.24	12	-5.76	0.378
1503-48-6	quino[2,3-b]acridine-6,7,13,14(5h,12h)-tetrone;quino(2,3-b)acridine-6,7,13,14(5h,12h)-tetrone;quino[2,3-b]acridine-6,7,13,14(5h,12h)-tetrone quino(2,3-b)acridine-6,7,13,14(5h,12h)-tetrone	NO	NO	6	NO	NO	10	TRUE	10	1	High		FALSE	161	8	YES	YES	TRUE	TRUE	356	493		not classified	not applicable			x		6	6	6	6	6	6	6	6	10	3	10	3		Oc1c2ccccc2nc2c1C(=O)c1c(C2=O)c(O)c2ccccc2n1	C20H10N2O4	342.29	4.24	12	-7.76	0.000774
154702-15-5	benzoic acid, 4,4'-[[6-[[4-[[(1,1-dimethylethyl)amino]carbonyl]phenyl]amino]-1,3,5-triazine-2,4-diyl]diimino]bis-, 1,1'-bis(2-ethylhexyl) ester;bis(2-ethylhexyl) 4,4’-{6-[4-tert-butylcarbamoyl)anilino]-1,3,5-triazine-2,4-diyldiimino}dibenzoate;iscotrinizol;diethylhexyl butamido triazone;dioctylbutamidotriazone;ra 3643;iscotrizinol;benzoic acid, 4,4'-[[6-[[4-[[(1,1-dimethylethyl)amino]carbonyl]phe…	NO	NO	6	NO	NO	10	TRUE	10	1	High		FALSE	161	8	YES	YES	TRUE	TRUE	356	493		not classified	not applicable			x		6	6	3	6	3	6	10	10	1	10	3	10		CCCCC(CC)COC(=O)c1ccc(Nc2nc(Nc3ccc(C(=O)NC(C)(C)C)cc3)nc(Nc3ccc(C(=O)OCC(CC)CCCC)cc3)n2)cc1	C44H59N7O5	765.95	12	12	0	11.8
15721-78-5	benzenamine, 4-(1,1,3,3-tetramethylbutyl)-n-[4-(1,1,3,3-tetramethylbutyl)phenyl]-;bis(4-(1,1,3,3-tetramethylbutyl)phenyl)amine;4-(2,4,4-trimethylpentan-2-yl)-n-[4-(2,4,4-trimethylpentan-2-yl)phenyl]aniline;benzenamine, 4-(1,1,3,3-tetramethylbutyl)-n- 4-(1,1,3,3-tetramethylbutyl)phenyl -;diphenylamine, 4,4'-bis(1,1,3,3-tetramethylbutyl)-;benzenamine, 4-(1,1,3,3-tetramethylbutyl)-n-Х4-(1,1,3,3-tetr…	NO	NO	6	NO	NO	10	TRUE	10	1	High		FALSE	161	8	YES	YES	TRUE	TRUE	356	493		not classified	not applicable		x	x		10	10	6	6	6	6	10	10	3	10	3	10		CC(C)(C)CC(C)(C)c1ccc(Nc2ccc(C(C)(C)CC(C)(C)C)cc2)cc1	C28H43N	393.63	10.82	12	-1.18	1180
15793-73-4	3h-pyrazol-3-one, 4,4’-[(3,3’-dichloro[1,1’-biphenyl]-4,4’-diyl)bis(azo)]bis[2,4-dihydro-5-methyl-2-(4-methylphenyl)-;4,4'-[(3,3'-dichloro[1,1'-biphenyl]-4,4'-diyl)bis(azo)]bis[2,4-dihydro-5-methyl-2-(p-tolyl)-3h-pyrazol-3-one];4,4'-[(3,3'-dichlorobiphenyl-4,4'-diyl)didiazene-2,1-diyl]bis[5-methyl-2-(4-methylphenyl)-2,4-dihydro-3h-pyrazol-3-one];3h-pyrazol-3-one, 4,4'-[(3,3'-dichloro[1,1'-bipheny…	NO	NO	6	NO	NO	10	TRUE	10	1	High		FALSE	161	8	YES	YES	TRUE	TRUE	356	493		not classified	not applicable		x	x		10	10	6	6	6	6	10	10	3	10	3	10		Cc1ccc(N2C(=O)C(N=Nc3ccc(-c4ccc(N=NC5C(C)=NN(c6ccc(C)cc6)C5=O)c(Cl)c4)cc3Cl)C(C)=N2)cc1	C34H28Cl2N8O2	651.52	11.26	12	-0.74	1550
162881-26-7	methanone, 1,1'-(phenylphosphinylidene)bis[1-(2,4,6-trimethylphenyl)-;phosphine oxide, phenylbis(2,4,6-trimethylbenzoyl)-;phenyl bis(2,4,6-trimethylbenzoyl)-phosphine oxide;[phenyl-(2,4,6-trimethylbenzoyl)phosphoryl]-(2,4,6-trimethylphenyl)methanone;irgacure 819;cgi 819;methanone,1,1'-(phenylphosphinylidene)bis[1-(2,4,6-trimethylphenyl)]-;methanone, 1,1'-(phenylphosphinylidene)bis[1-(2,4,6-trimet…	NO	NO	6	NO	NO	10	TRUE	10	1	High		FALSE	161	8	YES	YES	TRUE	TRUE	356	493		not classified	not applicable		x	x	x	10	10	10	10	10	10	10	10	10	10	10	10		Cc1cc(C)cc(C)c1C(=O)P(=O)(c1ccccc1)C(=O)c1c(C)cc(C)cc1C	C26H27O3P	418.44	4.65	12	-7.35	0.749
163149-28-8	1-dodecene, polymer with 1-decene and 1-octene, hydrogenated;none available;reaction products of 1-decene, 1-dodecene and 1-octene, hydrogenated;1-dodecene, polymer with 1-decene and 1-octene, hydrogenated none available reaction products of 1-decene, 1-dodecene and 1-octene, hydrogenated	NO	NO	6	NO	NO	10	TRUE	10	1	High		FALSE	161	8	YES	YES	TRUE	TRUE	356	493		not classified	not applicable			x		6	6	3	6	6	6	10	10	1	10	1	10		CCCCCCCCCC(CC)C(C)C(CCCCCCC)C(C)CCCCCC	C30H62	422.79	12	9.984	2.016	1630
17270-01-8	biphenyl-4,4'-diyl tetraphenyl bis(phosphate)	NO	NO	6	NO	YES	10	TRUE	10	1	High		FALSE	161	8	YES	YES	TRUE	TRUE	356	493		not classified	not applicable		x	x		10	10	6	6	6	6	6	6	6	10	6	10		O=P(Oc1ccccc1)(Oc1ccccc1)Oc1ccc(-c2ccc(OP(=O)(Oc3ccccc3)Oc3ccccc3)cc2)cc1	C36H28O8P2	650.52	9.17	12	-2.83	2.26
1843-03-4	1,1,3-tris(2-methyl-4-hydroxy-5-tert-butylphenyl)butane;topanol ca;1,1,3-tris-(2-methyl-4-hydroxy-5-tert-butylphenyl)butane;phenol, 4,4’,4’’-(1-methyl-1-propanyl-3-ylidene)tris[2-(1,1-dimethylethyl)-5-methyl-;4,4',4''-(1-methylpropanyl-3-ylidene)tris[6-tert-butyl-m-cresol];phenol, 4,4',4''-(1-methyl-1-propanyl-3-ylidene)tris 2-(1,1-dimethylethyl)-5-methyl-;4,4',4''-butane-1,1,3-triyltris(2-tert-b…	NO	NO	6	NO	NO	10	TRUE	10	1	High		FALSE	161	8	YES	YES	TRUE	TRUE	356	493		not classified	not applicable			x		6	6	3	3	3	3	10	10	1	10	3	10		CC(CC(c1cc(C(C)(C)C)c(O)cc1C)c1cc(C(C)(C)C)c(O)cc1C)c1cc(C(C)(C)C)c(O)cc1C	C37H52O3	544.78	12	12	0	14
18979-61-8	1,3-benzenediol, 4-butyl-;4-butylbenzene-1,3-diol;resorcinol, 4-butyl-;1,3-benzenediol, 4-butyl- 4-butylbenzene-1,3-diol resorcinol, 4-butyl-	NO	NO	6	NO	NO	10	TRUE	10	1	High		FALSE	161	8	YES	YES	TRUE	TRUE	356	493		not classified	not applicable		x	x	x	10	10	10	10	10	10	10	10	10	6	10	10		CCCCc1ccc(O)cc1O	C10H14O2	166.21	3.05	11.259	-8.209	0.0372
19125-99-6	1h-benz[de]isoquinoline-1,3(2h)-dione, 2-butyl-6-(butylamino)-;2-butyl-6-(butylamino)-1h-benz[de]isoquinoline-1,3(2h)-dione;2-butyl-6-(butylamino)-1h-benzo[de]isoquinoline-1,3(2h)-dione;1h-benz de isoquinoline-1,3(2h)-dione, 2-butyl-6-(butylamino)-;naphthalimide, n-butyl-4-(butylamino)-;1h-benzХdeеisoquinoline-1,3(2h)-dione, 2-butyl-6-(butylamino)-;1h-benz[de]isoquinoline-1,3(2h)-dione, 2-butyl-6…	NO	NO	6	NO	NO	10	TRUE	10	1	High		FALSE	161	8	YES	YES	TRUE	TRUE	356	493		not classified	not applicable		x	x	x	10	10	10	10	10	10	10	10	10	10	10	10		CCCCNc1ccc2c3c1cccc3C(=O)N(CCCC)C2=O	C20H24N2O2	324.4	4.78	12	-7.22	2.18
20749-68-2	12h-phthaloperin-12-one, 8,9,10,11-tetrachloro-;8,9,10,11-tetrachloro-12h-phthaloperin-12-one;8,9,10,11-tetrachloro-12h-isoindolo[2,1-a]perimidin-12-one;12-phthaloperinone, 8,9,10,11-tetrachloro-;12h-phthaloperin-12-one, 8,9,10,11-tetrachloro- 8,9,10,11-tetrachloro-12h-phthaloperin-12-one 8,9,10,11-tetrachloro-12h-isoindolo[2,1-a]perimidin-12-one 12-phthaloperinone, 8,9,10,11-tetrachloro-	NO	NO	6	NO	NO	10	TRUE	10	1	High		FALSE	161	8	YES	YES	TRUE	TRUE	356	493		not classified	not applicable		x	x	x	10	10	10	10	10	10	10	10	10	10	10	10		O=C1c2c(Cl)c(Cl)c(Cl)c(Cl)c2C2=Nc3cccc4cccc(c34)N12	C18H6Cl4N2O	408.05	5.79	12	-6.21	5.74
21145-77-7	6-acetyl-1,1,2,4,4,7-hexamethyltetraline;tonalid;ethanone, 1-(5,6,7,8-tetrahydro-3,5,5,6,8,8-hexamethyl-2-naphthalenyl)-;1-(5,6,7,8-tetrahydro-3,5,5,6,8,8-hexamethyl-2-naphthyl)ethan-1-one;1-(3,5,5,6,8,8-hexamethyl-5,6,7,8-tetrahydronaphthalen-2-yl)ethanone;1-(5,6,7,8-tetrahydro-3,5,5,6,8,8-hexamethyl-2-naphthalenyl)ethanone;6-acetyl-1,1,2,4,4,7-hexamethyltetraline tonalid ethanone, 1-(5,6,7,8-te…	NO	NO	6	NO	NO	10	TRUE	10	1	High		FALSE	161	8	YES	YES	TRUE	TRUE	356	493		not classified	not applicable				x	6	6	10	10	10	10	6	6	6	6	6	6		CC1CC(C)(C)c2cc(C(C)=O)c(C)cc2C1(C)C	C18H26O	258.38	5.7	7.945	-2.245	11.2
2280-49-1	benzenesulfonamide, n-phenyl-n-[(trichloromethyl)thio]-;n-phenyl-n-[(trichloromethyl)thio]benzenesulphonamide;n-phenyl-n-[(trichloromethyl)sulfanyl]benzenesulfonamide;benzenesulfonamide, n-phenyl-n- (trichloromethyl)thio -;benzenesulfonanilide, n-Х(trichloromethyl)thioе-;benzenesulfonamide, n-phenyl-n-Х(trichloromethyl)thioе-;benzenesulfonamide, n-phenyl-n-[(trichloromethyl)thio]- n-phenyl-n-[(tr…	NO	NO	6	NO	NO	10	TRUE	10	1	High		FALSE	161	8	YES	YES	TRUE	TRUE	356	493		not classified	not applicable			x	x	6	6	6	10	6	10	6	6	10	6	10	6		O=S(=O)(c1ccccc1)N(c1ccccc1)SC(Cl)(Cl)Cl	C13H10Cl3NO2S2	382.7	4.52	9.394	-4.874	1.8
23552-74-1	benzenesulfonamide, 3,3’-[(9,10-dihydro-9,10-dioxo-1,4-anthracenediyl)diimino]bis[n-cyclohexyl-2,4,6-trimethyl-;3,3'-[(9,10-dihydro-9,10-dioxo-1,4-anthrylene)diimino]bis[n-cyclohexyl-2,4,6-trimethylbenzenesulphonamide];3,3'-[(9,10-dioxo-9,10-dihydroanthracene-1,4-diyl)diimino]bis(n-cyclohexyl-2,4,6-trimethylbenzenesulfonamide);benzenesulfonamide, 3,3'-[(9,10-dihydro-9,10-dioxo-1,4-anthracenediyl)…	NO	NO	6	NO	YES	10	TRUE	10	1	High		FALSE	161	8	YES	YES	TRUE	TRUE	356	493		not classified	not applicable			x		6	6	6	6	6	6	10	10	3	10	3	10		Cc1cc(C)c(S(=O)(=O)NC2CCCCC2)c(C)c1Nc1ccc(Nc2c(C)cc(C)c(S(=O)(=O)NC3CCCCC3)c2C)c2c1C(=O)c1ccccc1C2=O	C44H52N4O6S2	797	12	12	0	14.5
2362-14-3	4,4'-cyclohexylidenedi-o-cresol;4,4'-cyclohexane-1,1-diylbis(2-methylphenol);phenol, 4,4'-cyclohexylidenebis[2-methyl-;4-[1-(4-hydroxy-3-methylphenyl)cyclohexyl]-2-methylphenol;dimethyl bisphenolcyclohexane;4,4’-cyclohexylidene di-o-cresol;1,1-bis(4-hydroxy-3-ethyl)cyclohexane;bis-oc-z;4,4'-cyclohexylidenedi-o-cresol 4,4'-cyclohexane-1,1-diylbis(2-methylphenol) phenol, 4,4'-cyclohexylidenebis[2-m…	NO	NO	6	NO	YES	10	TRUE	10	1	High		FALSE	161	8	YES	YES	TRUE	TRUE	356	493		not classified	not applicable		x	x	x	10	10	10	10	10	10	6	6	10	6	10	6		Cc1cc(C2(c3ccc(O)c(C)c3)CCCCC2)ccc1O	C20H24O2	296.39	6.1	12	-5.9	0.548
2379-74-0	c.i. vat red 1;benzo[b]thiophen-3(2h)-one, 6-chloro-2-(6-chloro-4-methyl-3-oxobenzo[b]thien-2(3h)-ylidene)-4-methyl-;6-chloro-2-(6-chloro-4-methyl-3-oxobenzo[b]thien-2(3h)-ylidene)-4-methylbenzo[b]thiophene-3(2h)-one;6-chloro-2-(6-chloro-4-methyl-3-oxo-1-benzothiophen-2(3h)-ylidene)-4-methyl-1-benzothiophen-3(2h)-one;benzo b thiophen-3(2h)-one, 6-chloro-2-(6-chloro-4-methyl-3-oxobenzo b thien-2(3…	NO	NO	6	NO	YES	10	TRUE	10	1	High		FALSE	161	8	YES	YES	TRUE	TRUE	356	493		not classified	not applicable		x	x	x	10	10	10	10	10	10	10	10	10	10	10	10		Cc1cc(Cl)cc2c1C(=O)C(=C1C(=O)c3c(C)cc(Cl)cc3S1)S2	C18H10Cl2O2S2	393.29	5.92	12	-6.08	11.3
2425-85-6	2-naphthalenol, 1-[2-(4-methyl-2-nitrophenyl)diazenyl]-;c.i. pigment red 3;2-naphthalenol, 1-[(4-methyl-2-nitrophenyl)azo]-;1-(4-methyl-2-nitrophenylazo)-2-naphthol;1-[(4-methyl-2-nitrophenyl)diazenyl]naphthalen-2-ol;2-naphthalenol, 1- (4-methyl-2-nitrophenyl)azo -;2-naphthalenol, 1-Х(4-methyl-2-nitrophenyl)azoе-;toluidine red;1-[(4-methyl-2-nitrophenyl)diazenyl]-2-naphthol; c.i. pigment red 3;2-…	NO	NO	6	NO	NO	10	TRUE	10	1	High		FALSE	161	8	YES	YES	TRUE	TRUE	356	493		not classified	not applicable		x	x	x	10	10	10	10	10	10	10	10	10	10	10	10		Cc1ccc(N=Nc2c3ccccc3ccc2O)c(N(=O)=O)c1	C17H13N3O3	307.29	6.45	12	-5.55	3.16
2440-22-4	phenol, 2-(2h-benzotriazol-2-yl)-4-methyl-;2-(2-hydroxy-5-methylphenyl)benzotriazole;2-(2h-benzotriazol-2-yl)-p-cresol;2-(2h-benzotriazol-2-yl)-4-methylphenol;p-cresol, 2-(2h-benzotriazol-2-yl)-;tk 10047;2-(2h-benzotriazol-2-yl)-4-methylphenol (2-(2h-benzotriazol-2-yl)-p-cresol) (phenol, 2-(2h-benzotriazol-2-yl)-4-methyl-);phenol, 2-(2h-benzotriazol-2-yl)-4-methyl- 2-(2-hydroxy-5-methylphenyl)ben…	NO (Toxicity Score of 1 confirmed)	NO	6	NO	NO	10	TRUE	10	1	Low		FALSE	161	8	YES	YES	TRUE	TRUE	356	493		OTH-NO	STOT RE		x	x	x	10	10	10	10	10	10	10	10	10	10	10	10		Cc1ccc(O)c(N2Nc3ccccc3N2)c1	C13H13N3O	227.25	2.53	12	-9.47	1.28
2478-20-8	1h-benz[de]isoquinoline-1,3(2h)-dione, 6-amino-2-(2,4-dimethylphenyl)-;6-amino-2-(2,4-dimethylphenyl)-1h-benz[de]isoquinoline-1,3(2h)-dione;6-amino-2-(2,4-dimethylphenyl)-1h-benzo[de]isoquinoline-1,3(2h)-dione;6amino2(2,4dimethylphenyl)1hbenz[de]isoquinoline1,3(2h)dione (solvent yellow44)anditssalts,whenusedas a substanceinhairdye products;1h-benz de isoquinoline-1,3(2h)-dione, 6-amino-2-(2,4-dim…	NO	NO	6	NO	YES	10	TRUE	10	1	High		FALSE	161	8	YES	YES	TRUE	TRUE	356	493		not classified	not applicable		x	x	x	10	10	10	10	10	10	10	10	10	10	10	10		Cc1ccc(N2C(=O)c3cccc4c3c(ccc4N)C2=O)c(C)c1	C20H16N2O2	316.34	2.55	12	-9.45	0.334
2512-29-0	butanamide, 2-[(4-methyl-2-nitrophenyl)azo]-3-oxo-n-phenyl-;2-[(4-methyl-2-nitrophenyl)azo]-3-oxo-n-phenylbutyramide;2-[(4-methyl-2-nitrophenyl)diazenyl]-3-oxo-n-phenylbutanamide;butanamide, 2- (4-methyl-2-nitrophenyl)azo -3-oxo-n-phenyl-;hansa yellow;c.i. pigment yellow 1;butanamide, 2-Х(4-methyl-2-nitrophenyl)azoе-3-oxo-n-phenyl-;butanamide, 2-[(4-methyl-2-nitrophenyl)azo]-3-oxo-n-phenyl- 2-[(4…	NO	NO	6	NO	NO	10	TRUE	10	1	High		FALSE	161	8	YES	YES	TRUE	TRUE	356	493		not classified	not applicable		x	x	x	10	10	10	10	10	10	10	10	10	6	10	10		Cc1ccc(N=NC(C(C)=O)C(=O)Nc2ccccc2)c(N(=O)=O)c1	C17H16N4O4	340.32	3.94	12	-8.06	0.0662
25371-54-4	phosphonic acid, octadecyl-, dimethyl ester;dimethyl octadecylphosphonate;phosphonic acid, octadecyl-, dimethyl ester dimethyl octadecylphosphonate	NO	NO	6	NO	NO	10	TRUE	10	1	High		FALSE	161	8	YES	YES	TRUE	TRUE	356	493		not classified	not applicable		x	x	x	10	10	10	10	10	10	10	10	6	10	6	6		CCCCCCCCCCCCCCCCCCP(=O)(OC)OC	C20H43O3P	362.51	7.76	9.961	-2.201	12.6
26040-51-7	bis(2-ethylhexyl) tetrabromophthalate;1,2-benzenedicarboxylic acid, 3,4,5,6-tetrabromo-, bis(2-ethylhexyl) ester;bis(2-ethylhexyl) 3,4,5,6-tetrabromobenzene-1,2-dicarboxylate;phthalic acid, tetrabromo-, bis(2-ethylhexyl) ester;bis(2-ethylhexyl) 3,4,5,6-tetrabromophthalate;bis(2-ethylhexyl) 3,4,5,6-tetrabromophthalate (1,2-benzenedicarboxylic acid, 3,4,5,6-tetrabromo-, bis(2-ethylhexyl) ester);bis…	NO	NO	6	NO	NO	10	TRUE	10	1	High		FALSE	161	8	YES	YES	TRUE	TRUE	356	493		not classified	not applicable			x		6	6	3	3	3	3	10	10	1	10	3	10		CCCCC(CC)COC(=O)c1c(Br)c(Br)c(Br)c(Br)c1C(=O)OCC(CC)CCCC	C24H34Br4O4	706.14	11.95	12	-0.05	7.42
26544-23-0	phosphorous acid, isodecyl diphenyl ester;isodecyl diphenyl phosphite;8-methylnonyl diphenyl phosphite;phosphorous acid, 8-methylnonyl diphenyl ester;dpdp;dpidp;lankromark le131;phosphorous acid, isodecyl diphenyl ester isodecyl diphenyl phosphite 8-methylnonyl diphenyl phosphite phosphorous acid, 8-methylnonyl diphenyl ester dpdp dpidp lankromark le131	NO	NO	6	NO	NO	10	TRUE	10	1	High		FALSE	161	8	YES	YES	TRUE	TRUE	356	493		not classified	not applicable		x	x	x	10	10	10	10	10	10	10	10	6	10	6	10		CC(C)CCCCCCCOP(Oc1ccccc1)Oc1ccccc1	C22H31O3P	374.44	8.52	11.634	-3.114	15.5
27425-55-4	2h-1-benzopyran-2-one, 3-(1h-benzimidazol-2-yl)-7-(diethylamino)-;3-(1h-benzimidazol-2-yl)-7-(diethylamino)-2-benzopyrone;3-(1h-benzimidazol-2-yl)-7-(diethylamino)-2h-chromen-2-one;coumarin, 3-(2-benzimidazolyl)-7-(diethylamino)-;2h-1-benzopyran-2-one, 3-(1h-benzimidazol-2-yl)-7-(diethylamino)- 3-(1h-benzimidazol-2-yl)-7-(diethylamino)-2-benzopyrone 3-(1h-benzimidazol-2-yl)-7-(diethylamino)-2h-ch…	NO	NO	6	NO	NO	10	TRUE	10	1	High		FALSE	161	8	YES	YES	TRUE	TRUE	356	493		not classified	not applicable		x	x	x	10	10	10	10	10	10	10	10	10	10	10	10		CCN(CC)c1ccc2C=C(C3Nc4ccccc4N=3)C(=O)Oc2c1	C20H19N3O2	333.37	3.68	12	-8.32	0.155
2786-76-7	2-naphthalenecarboxamide, 4-[[4-(aminocarbonyl)phenyl]azo]-n-(2-ethoxyphenyl)-3-hydroxy-;4-[[4-(aminocarbonyl)phenyl]azo]-n-(2-ethoxyphenyl)-3-hydroxynaphthalene-2-carboxamide;4-[(4-carbamoylphenyl)diazenyl]-n-(2-ethoxyphenyl)-3-hydroxynaphthalene-2-carboxamide;2-naphthalenecarboxamide, 4- 4-(aminocarbonyl)phenyl azo -n-(2-ethoxyphenyl)-3-hydroxy-;2-naphthalenecarboxamide, 4- 4-(aminocarbonyl)phe…	NO	NO	6	NO	NO	10	TRUE	10	1	High		FALSE	161	8	YES	YES	TRUE	TRUE	356	493		not classified	not applicable		x	x	x	10	10	10	10	10	10	6	6	10	6	10	6		CCOc1ccccc1NC(=O)c1cc2ccccc2c(N=Nc2ccc(C(N)=O)cc2)c1O	C26H22N4O4	454.46	6.04	12	-5.96	0.376
27870-92-4	1h-thioxantheno[2,1,9-def]isoquinoline-1,3(2h)-dione, 2-octadecyl-;2-octadecyl-1h-thioxantheno[2,1,9-def]isoquinoline-1,3(2h)-dione;2-octadecyl-1h-benzo[3,4]isothiochromeno[7,8,1-def]isoquinoline-1,3(2h)-dione;1h-thioxantheno[2,1,9-def]isoquinoline-1,3(2h)-dione, 2-octadecyl- 2-octadecyl-1h-thioxantheno[2,1,9-def]isoquinoline-1,3(2h)-dione 2-octadecyl-1h-benzo[3,4]isothiochromeno[7,8,1-def]isoqui…	NO	NO	6	NO	NO	10	TRUE	10	1	High		FALSE	161	8	YES	YES	TRUE	TRUE	356	493		not classified	not applicable			x		6	6	6	6	6	6	10	10	3	10	3	10		CCCCCCCCCCCCCCCCCCN1C(=O)c2ccc3c4c2c(ccc4-c2ccccc2S3)C1=O	C36H45NO2S	555.78	12	12	0	162
2814-77-9	2-naphthalenol, 1-[(2-chloro-4-nitrophenyl)azo]-;1-[(2-chloro-4-nitrophenyl)azo]-2-naphthol;1-[(2-chloro-4-nitrophenyl)diazenyl]naphthalen-2-ol;2-naphthalenol, 1- (2-chloro-4-nitrophenyl)azo -;c.i. pigment red 4;2-naphthalenol, 1-Х(2-chloro-4-nitrophenyl)azoе-;2-naphthol, 1-(2-chloro-4-nitrophenylazo)-;1-[(2-chloro-4-nitrophenyl)diazenyl]-2-naphthol;2-naphthalenol, 1-[(2-chloro-4-nitrophenyl)azo]…	NO	NO	6	NO	NO	10	TRUE	10	1	High		FALSE	161	8	YES	YES	TRUE	TRUE	356	493		not classified	not applicable		x	x	x	10	10	10	10	10	10	10	10	10	10	10	10		Oc1ccc2ccccc2c1N=Nc1ccc(N(=O)=O)cc1Cl	C16H10ClN3O3	327.71	6.55	12	-5.45	5.81
298692-41-8	isopropyl (diaminophosphoryl) carbamate	NO	NO	6	NO	YES	10	TRUE	10	1	High		FALSE	161	8	YES	YES	TRUE	TRUE	356	493		not classified	not applicable		x	x	x	10	10	10	10	10	10	10	10	10	10	10	10		CC(C)OC(=O)NP(N)(N)=O	C4H12N3O3P	181.13	-1.92	11.358	-13.278	0.00509
29911-27-1	2-propanol, 1-(1-methyl-2-propoxyethoxy)-;1-(1-methyl-2-propoxyethoxy)propan-2-ol;butyl dipropasol solvent;1-[(1-propoxypropan-2-yl)oxy]propan-2-ol;dipropylene glycol, monopropyl ether;dipropylene glycol, propyl ether;dipropylene glycol propyl ether;dipropylene glycol (mono) propyl ether;2-propanol, 1-(1-methyl-2-propoxyethoxy)- 1-(1-methyl-2-propoxyethoxy)propan-2-ol butyl dipropasol solvent 1-[…	NO	NO	6	NO	NO	10	TRUE	10	1	High		FALSE	161	8	YES	YES	TRUE	TRUE	356	493		not classified	not applicable			x	x	6	6	6	6	10	6	6	6	10	6	10	6		CCCOCC(C)OCC(C)O	C9H20O3	176.24	0.64	7.723	-7.083	0.0353
29920-31-8	dimethyl 5-[(e)-{1,3-dioxo-1-[(2-oxo-2,3-dihydro-1h-benzimidazol-5-yl)amino]butan-2-yl}diazenyl]benzene-1,3-dicarboxylate	NO	NO	6	NO	YES	10	TRUE	10	1	High		FALSE	161	8	YES	YES	TRUE	TRUE	356	493		not classified	not applicable		x	x	x	10	10	10	10	10	10	10	10	10	3	10	6		CC(=O)C(C(=O)Nc1ccc2c(c1)N=C(O)N2)N=Nc1cc(C(=O)OC)cc(C(=O)OC)c1	C21H19N5O7	453.39	2.18	12	-9.82	0.000217
30025-38-8	propanol, (2-ethoxymethylethoxy)-;mixture of isomers;dipropylene glycol ethyl ether;dpgee;dipropylene glycol monoethyl ether;dpgmee;propanol, (2-ethoxymethylethoxy)- mixture of isomers dipropylene glycol ethyl ether dpgee dipropylene glycol monoethyl ether dpgmee	NO	NO	6	NO	NO	10	TRUE	10	1	High		FALSE	161	8	YES	YES	TRUE	TRUE	356	493		not classified	not applicable			x	x	6	6	6	6	10	6	6	6	10	6	10	6		CCOC(C)COCC(C)O	C8H18O3	162.22	0.15	7.357	-7.207	0.0256
302776-68-7	benzoic acid, 2-[4-(diethylamino)-2-hydroxybenzoyl]-, hexyl ester;hexyl 2-(1-(diethylaminohydroxyphenyl)methanoyl)benzoate;benzoic acid, 2-[4-(diethylamino)-2-hydroxybenzoyl]-, hexyl ester hexyl 2-(1-(diethylaminohydroxyphenyl)methanoyl)benzoate	NO	NO	6	NO	NO	10	TRUE	10	1	High		FALSE	161	8	YES	YES	TRUE	TRUE	356	493		not classified	not applicable		x	x	x	10	10	10	10	10	10	6	6	10	6	10	6		CCCCCCOC(=O)c1ccccc1C(=O)c1ccc(N(CC)CC)cc1O	C24H31NO4	397.49	6.54	12	-5.46	0.161
3049-71-6	anthra[2,1,9-def:6,5,10-d’e’f’]diisoquinoline-1,3,8,10(2h,9h)-tetrone, 2,9-bis[4-(phenylazo)phenyl]-;2,9-bis[4-(phenylazo)phenyl]anthra[2,1,9-def:6,5,10-d'e'f']diisoquinoline-1,3,8,10(2h,9h)-tetrone;2,9-bis[4-(phenyldiazenyl)phenyl]isoquino[4',5',6':6,5,10]anthra[2,1,9-def]isoquinoline-1,3,8,10(2h,9h)-tetrone;anthra[2,1,9-def:6,5,10-d'e'f']diisoquinoline-1,3,8,10(2h,9h)-tetrone, 2,9-bis[4-(phenyl…	NO	NO	6	NO	NO	10	TRUE	10	1	High		FALSE	161	8	YES	YES	TRUE	TRUE	356	493		not classified	not applicable		x	x	x	10	10	10	10	10	10	10	10	6	10	6	10		O=C1c2ccc3c4ccc5c6c4c(ccc6C(=O)N(c4ccc(N=Nc6ccccc6)cc4)C5=O)c4ccc(c2c34)C(=O)N1c1ccc(N=Nc2ccccc2)cc1	C48H26N6O4	750.72	9.41	12	-2.59	62.2
3089-16-5	quino[2,3-b]acridine-7,14-dione, 4,11-dichloro-5,12-dihydro-;4,11-dichloro-5,12-dihydroquino[2,3-b]acridine-7,14-dione;quinoХ2,3-bеacridine-7,14-dione, 4,11-dichloro-5,12-dihydro-;quino[2,3-b]acridine-7,14-dione, 4,11-dichloro-5,12-dihydro- 4,11-dichloro-5,12-dihydroquino[2,3-b]acridine-7,14-dione quinoХ2,3-bеacridine-7,14-dione, 4,11-dichloro-5,12-dihydro-	NO	NO	6	NO	NO	10	TRUE	10	1	High		FALSE	161	8	YES	YES	TRUE	TRUE	356	493		not classified	not applicable		x	x	x	6	10	10	10	6	10	6	6	10	3	10	3		Oc1c2cccc(Cl)c2nc2cc3c(cc12)nc1c(Cl)cccc1c3O	C20H10Cl2N2O2	381.2	4.97	12	-7.03	0.0103
3089-17-6	quino[2,3-b]acridine-7,14-dione, 2,9-dichloro-5,12-dihydro-;2,9-dichloro-5,12-dihydroquino[2,3-b]acridine-7,14-dione;quino 2,3-b acridine-7,14-dione, 2,9-dichloro-5,12-dihydro-;quinoХ2,3-bеacridine-7,14-dione, 2,9-dichloro-5,12-dihydro-;quino[2,3-b]acridine-7,14-dione, 2,9-dichloro-5,12-dihydro- 2,9-dichloro-5,12-dihydroquino[2,3-b]acridine-7,14-dione quino 2,3-b acridine-7,14-dione, 2,9-dichloro…	NO	NO	6	NO	NO	10	TRUE	10	1	High		FALSE	161	8	YES	YES	TRUE	TRUE	356	493		not classified	not applicable		x	x	x	6	10	10	10	6	10	6	6	10	3	10	3		Oc1c2cc(Cl)ccc2nc2cc3c(cc12)nc1ccc(Cl)cc1c3O	C20H10Cl2N2O2	381.2	4.97	12	-7.03	0.0103
31775-20-9	2,2'-[(3,3'-dichloro[1,1'-biphenyl]-4,4'-diyl)bis(azo)]bis[n-(4-ethoxyphenyl)-3-oxobutyramide];2,2'-[(3,3'-dichlorobiphenyl-4,4'-diyl)didiazene-2,1-diyl]bis[n-(4-ethoxyphenyl)-3-oxobutanamide];p-acetoacetophenetidide, 2,2''-[(3,3'-dichloro-4,4'-biphenylylene)bis(azo)]bis-;butanamide, 2,2'-[(3,3'-dichloro[1,1'-biphenyl]-4,4'-diyl)bis(azo)]bis[n-(4-ethoxyphenyl)-3-oxo-;p-acetoacetophenetidide, 2,2'…	NO	NO	6	NO	YES	10	TRUE	10	1	High		FALSE	161	8	YES	YES	TRUE	TRUE	356	493		not classified	not applicable		x	x	x	10	10	10	10	10	10	6	6	6	10	6	10		CCOc1ccc(NC(=O)C(C(C)=O)N=Nc2ccc(-c3ccc(N=NC(C(C)=O)C(=O)Nc4ccc(OCC)cc4)c(Cl)c3)cc2Cl)cc1	C36H34Cl2N6O6	717.57	8.2	12	-3.8	2.19
31778-10-6	benzoic acid, 2-[[3-[[(2,3-dihydro-2-oxo-1h-benzimidazol-5-yl)amino]carbonyl]-2-hydroxy-1-naphthalenyl]azo]-, butyl ester;butyl 2-[[3-[[(2,3-dihydro-2-oxo-1h-benzimidazol-5-yl)amino]carbonyl]-2-hydroxy-1-naphthyl]azo]benzoate;butyl 2-({2-hydroxy-3-[(2-oxo-2,3-dihydro-1h-benzimidazol-5-yl)carbamoyl]naphthalen-1-yl}diazenyl)benzoate;benzoic acid, 2-[[3-[[(2,3-dihydro-2-oxo-1h-benzimidazol-5-yl)amin…	NO	NO	6	NO	YES	10	TRUE	10	1	High		FALSE	161	8	YES	YES	TRUE	TRUE	356	493		not classified	not applicable		x			10	10	6	6	6	6	6	6	6	6	6	6		CCCCOC(=O)c1ccccc1N=Nc1c2ccccc2cc(C(=O)Nc2ccc3c(c2)N=C(O)N3)c1O	C29H25N5O5	523.52	8.11	12	-3.89	0.135
32724-62-2	9,10-anthracenedione, 1,4-bis[(2,6-diethyl-4-methylphenyl)amino]-;1,4-bis[(2,6-diethyl-4-methylphenyl)amino]anthraquinone;1,4-bis[(2,6-diethyl-4-methylphenyl)amino]anthracene-9,10-dione;1,4-bis[(2,6-diethyl-4-methylphenyl)amino]-9,10-anthraquinone;9,10-anthracenedione, 1,4-bis[(2,6-diethyl-4-methylphenyl)amino]- 1,4-bis[(2,6-diethyl-4-methylphenyl)amino]anthraquinone 1,4-bis[(2,6-diethyl-4-methyl…	NO (Toxicity Score of 1 confirmed)	NO	6	NO	NO	10	TRUE	10	1	Low		FALSE	161	8	YES	YES	TRUE	TRUE	356	493		OTH-NO	MUTA			x		6	6	3	6	3	6	10	10	1	10	3	10		CCc1cc(C)cc(CC)c1Nc1ccc(Nc2c(CC)cc(C)cc2CC)c2c1C(=O)c1ccccc1C2=O	C36H38N2O2	530.67	12	12	0	19.5
33229-34-4	hc blue no. 2;hc blue 2;hc blue no. 2 [aka ethanol, 2,2'((4-(2-hydroxyethylamino)-3-nitrophenyl)imino)di-];ethanol, 2,2’-[[4-[(2-hydroxyethyl)amino]-3-nitrophenyl]imino]bis-;2,2'-[[4-[(2-hydroxyethyl)amino]-3-nitrophenyl]imino]bisethanol;2,2'-({4-[(2-hydroxyethyl)amino]-3-nitrophenyl}imino)diethanol;ethanol, 2,2'-[[4-[(2-hydroxethyl)amino]-3-nitrophenyl]imino]bis-;2-[(4-n,n-bis-(2'-hydroxyethyl)a…	NO	NO	6	NO	NO	10	TRUE	10	1	High		FALSE	161	8	YES	YES	TRUE	TRUE	356	493		not classified	not applicable		x	x	x	10	10	10	10	10	10	10	10	10	10	10	10		OCCNc1ccc(N(CCO)CCO)cc1N(=O)=O	C12H19N3O5	285.29	1.7	12	-10.3	0.0031
337906-36-2	1,4-benzenediamine, 2-(methoxymethyl)-;2-(methoxymethyl)benzene-1,4-diamine;1,4-benzenediamine, 2-(methoxymethyl)- 2-(methoxymethyl)benzene-1,4-diamine	NO	NO	6	NO	NO	10	TRUE	10	1	High		FALSE	161	8	YES	YES	TRUE	TRUE	356	493		not classified	not applicable			x	x	6	6	10	10	10	10	10	10	10	6	10	10		COCc1cc(N)ccc1N	C8H12N2O	152.19	-0.61	8.839	-9.449	0.00367
3407-42-9	cyclohexanol, 3-(5,5,6-trimethylbicyclo[2.2.1]hept-2-yl)-;3-(5,5,6-trimethylbicyclo[2.2.1]hept-2-yl)cyclohexan-1-ol;3-(5,5,6-trimethylbicyclo[2.2.1]hept-2-yl)cyclohexanol;cyclohexanol, 3-(5,5,6-trimethylbicyclo(2.2.1)hept-2-yl)-;cyclohexanol, 3-(5,5,6-trimethylbicyclo[2.2.1]hept-2-yl)- 3-(5,5,6-trimethylbicyclo[2.2.1]hept-2-yl)cyclohexan-1-ol 3-(5,5,6-trimethylbicyclo[2.2.1]hept-2-yl)cyclohexanol…	NO	NO	6	NO	NO	10	TRUE	10	1	High		FALSE	161	8	YES	YES	TRUE	TRUE	356	493		not classified	not applicable				x	6	6	10	10	10	10	6	6	6	6	6	6		CC1C2CC(CC2C2CCCC(O)C2)C1(C)C	C16H28O	236.38	5.5	8.679	-3.179	16.8
3468-63-1	2-naphthalenol, 1-[(2,4-dinitrophenyl)azo]-;1-[(2,4-dinitrophenyl)azo]-2-naphthol;1-[(2,4-dinitrophenyl)diazenyl]naphthalen-2-ol;colouringagentci12075(pigmentorange 5)anditslakes,pigmentsandsalts;2-naphthalenol, 1- (2,4-dinitrophenyl)azo -;c.i. pigment orange 5;2-naphthalenol, 1-Х(2,4-dinitrophenyl)azoе-;pigment orange 5;1-[(2,4-dinitrophenyl)diazenyl]-2-naphthol;2-naphthalenol, 1-[(2,4-dinitroph…	NO (Toxicity Score of 1 confirmed)	NO	6	NO	NO	10	TRUE	10	1	Low		FALSE	161	8	YES	YES	TRUE	TRUE	356	493		OTH-NO	CARC-MUTA		x	x	x	10	10	10	10	10	10	10	10	10	10	10	6		Oc1ccc2ccccc2c1N=Nc1ccc(N(=O)=O)cc1N(=O)=O	C16H10N4O5	338.26	5.72	12	-6.28	1.21
3520-72-7	pigment orange-13;3h-pyrazol-3-one, 4,4'-[(3,3'-dichloro[1,1'-biphenyl]-4,4'-diyl)bis(2,1-diazenediyl)]bis[2,4-dihydro-5-methyl-2-phenyl-;3h-pyrazol-3-one, 4,4’-[(3,3’-dichloro[1,1’-biphenyl]-4,4’-diyl)bis(azo)]bis[2,4-dihydro-5-methyl-2-phenyl-;4,4'-[(3,3'-dichloro[1,1'-biphenyl]-4,4'-diyl)bis(azo)]bis[2,4-dihydro-5-methyl-2-phenyl-3h-pyrazol-3-one];4,4'-[(3,3'-dichlorobiphenyl-4,4'-diyl)didiaze…	NO	NO	6	NO	NO	10	TRUE	10	1	High		FALSE	161	8	YES	YES	TRUE	TRUE	356	493		not classified	not applicable		x	x		10	10	6	6	6	6	10	10	6	10	6	10		CC1C(N=Nc2ccc(-c3ccc(N=NC4C(C)=NN(c5ccccc5)C4=O)c(Cl)c3)cc2Cl)C(=O)N(c2ccccc2)N=1	C32H24Cl2N8O2	623.47	10.16	12	-1.84	118
35636-63-6	1,4-benzenedicarboxylic acid, 2-[[1-[[(2,3-dihydro-2-oxo-1h-benzimidazol-5-yl)amino]carbonyl]-2-oxopropyl]azo]-, dimethyl ester;dimethyl 2-[[1-[[(2,3-dihydro-2-oxo-1h-benzimidazol-5-yl)amino]carbonyl]-2-oxopropyl]azo]terephthalate;dimethyl 2-({1,3-dioxo-1-[(2-oxo-2,3-dihydro-1h-benzimidazol-5-yl)amino]butan-2-yl}diazenyl)benzene-1,4-dicarboxylate;1,4-benzenedicarboxylic acid, 2-[[1-[[(2,3-dihydro…	NO	NO	6	NO	YES	10	TRUE	10	1	High		FALSE	161	8	YES	YES	TRUE	TRUE	356	493		not classified	not applicable		x	x	x	10	10	10	10	10	10	10	10	10	3	10	6		CC(=O)C(C(=O)Nc1ccc2c(c1)N=C(O)N2)N=Nc1cc(C(=O)OC)ccc1C(=O)OC	C21H19N5O7	453.39	2.18	12	-9.82	0.000217
35869-64-8	2-naphthalenecarboxamide, n,n’-(2-chloro-1,4-phenylene)bis[4-[(4-chloro-2-nitrophenyl)azo]-3-hydroxy-;n,n'-(2-chloro-1,4-phenylene)bis[4-[(4-chloro-2-nitrophenyl)azo]-3-hydroxynaphthalene-2-carboxamide];n,n'-(2-chlorobenzene-1,4-diyl)bis{4-[(4-chloro-2-nitrophenyl)diazenyl]-3-hydroxynaphthalene-2-carboxamide};2-naphthalenecarboxamide, n,n'-(2-chloro-1,4-phenylene)bis[4-[(4-chloro-2-nitrophenyl)az…	NO	NO	6	NO	NO	10	TRUE	10	1	High		FALSE	161	8	YES	YES	TRUE	TRUE	356	493		not classified	not applicable		x	x		10	6	6	6	6	6	10	10	3	10	3	10		Oc1c(C(=O)Nc2ccc(NC(=O)c3cc4ccccc4c(N=Nc4ccc(Cl)cc4N(=O)=O)c3O)cc2Cl)cc2ccccc2c1N=Nc1ccc(Cl)cc1N(=O)=O	C40H23Cl3N8O8	849.99	12	12	0	126
36062-04-1	3,5-heptanedione, 1,7-bis(4-hydroxy-3-methoxyphenyl)-;3,5-heptamedopme. 1,7-bis(hydroxy-3methoxyphenyl)heptane;3,5-heptanedione, 1,7-bis(4-hydroxy-3-methoxyphenyl)- 3,5-heptamedopme. 1,7-bis(hydroxy-3methoxyphenyl)heptane	NO	NO	6	NO	YES	10	TRUE	10	1	High		FALSE	161	8	YES	YES	TRUE	TRUE	356	493		not classified	not applicable		x	x	x	10	10	10	10	10	10	10	10	10	6	10	10		COc1cc(CCC(=O)CC(=O)CCc2ccc(O)c(OC)c2)ccc1O	C21H24O6	372.39	3.14	12	-8.86	0.0104
36968-27-1	2-naphthalenecarboxamide, 4-[[4-(aminocarbonyl)phenyl]azo]-3-hydroxy-n-(2-methoxyphenyl)-;4-[[4-(aminocarbonyl)phenyl]azo]-3-hydroxy-n-(2-methoxyphenyl)naphthalene-2-carboxamide;4-[(4-carbamoylphenyl)diazenyl]-3-hydroxy-n-(2-methoxyphenyl)naphthalene-2-carboxamide;2-naphthalenecarboxamide, 4- 4-(aminocarbonyl)phenyl azo -3-hydroxy-n-(2-methoxyphenyl)-;2-naphthalenecarboxamide, 4- 4-(aminocarbonyl…	NO (Toxicity Score of 1 confirmed)	NO	6	NO	NO	10	TRUE	10	1	Low		FALSE	161	8	YES	YES	TRUE	TRUE	356	493		OTH-NO	MUTA		x	x	x	10	10	10	10	10	10	6	6	10	6	10	6		COc1ccccc1NC(=O)c1cc2ccccc2c(N=Nc2ccc(C(N)=O)cc2)c1O	C25H20N4O4	440.43	5.55	12	-6.45	0.273
3741-80-8	2-benzothiazolesulfenamide, n-(2-benzothiazolythio)-n-(1,1-dimethylethyl)-;2-benzothiazolesulfenamide, n-(2-benzothiazolylthio)-n-(1,1-dimethylethyl)-;n-(1,1-dimethylethyl)bis(2-benzothiazolesulfen)amide;di(2-benzothiazolesulfen)amide, n-tert-butyl-;2-benzothiazolesulfenamide, n-(2-benzothiazolythio)-n-(1,1-dimethylethyl)- 2-benzothiazolesulfenamide, n-(2-benzothiazolylthio)-n-(1,1-dimethylethyl)…	NO	NO	6	NO	NO	10	TRUE	10	1	High		FALSE	161	8	YES	YES	TRUE	TRUE	356	493		not classified	not applicable		x	x	x	10	10	10	10	10	10	10	10	10	10	10	10		CC(C)(C)N(SC1=Nc2ccccc2S1)SC1=Nc2ccccc2S1	C18H17N3S4	403.59	4.15	12	-7.85	0.171
38083-17-9	climbazole;1-(4-chlorophenoxy)-1-(1h-imidazol-1-yl)-3,3-dimethylbutan-2-one;2-butanone, 1-(4-chlorophenoxy)-1-(1h-imidazol-1-yl)-3,3-dimethyl-;baysan (bay meb 6401);2-butanone, 1-(p-chlorophenoxy)-3,3-dimethyl-1-(1-imidazolyl)-;climbazole 1-(4-chlorophenoxy)-1-(1h-imidazol-1-yl)-3,3-dimethylbutan-2-one 2-butanone, 1-(4-chlorophenoxy)-1-(1h-imidazol-1-yl)-3,3-dimethyl- baysan (bay meb 6401) 2-buta…	NO	NO	6	NO	NO	10	TRUE	10	1	High		FALSE	161	8	YES	YES	TRUE	TRUE	356	493		not classified	not applicable		x	x	x	10	10	10	10	10	10	10	10	10	10	10	10		CC(C)(C)C(=O)C(N1C=CN=C1)Oc1ccc(Cl)cc1	C15H17ClN2O2	292.75	3.76	10.692	-6.932	4.78
38668-48-3	2-propanol, 1,1’-[(4-methylphenyl)imino]bis-;1,1'-(p-tolylimino)dipropan-2-ol;1,1'-[(4-methylphenyl)imino]dipropan-2-ol;2-propanol, 1,1'-[(4-methylphenyl)imino]bis-;2-propanol, 1,1'- (4-methylphenyl)imino bis-;2-propanol, 1,1'-Х(4-methylphenyl)iminoеbis-;2-propanol, 1,1'-(p-tolylimino)di-;reaction product of 4-methylaniline and 2-methyloxirane;2-propanol, 1,1’-[(4-methylphenyl)imino]bis- 1,1'-(p-…	NO	NO	6	NO	NO	10	TRUE	10	1	High		FALSE	161	8	YES	YES	TRUE	TRUE	356	493		not classified	not applicable		x	x	x	6	10	10	10	10	10	6	6	10	6	10	10		CC(O)CN(CC(C)O)c1ccc(C)cc1	C13H21NO2	223.3	2.01	9.804	-7.794	0.0307
38720-66-0	1,2-dichloro-5,12-dihydroquino[2,3-b]acridine-7,14-dione	NO	NO	6	NO	YES	10	TRUE	10	1	High		FALSE	161	8	YES	YES	TRUE	TRUE	356	493		not classified	not applicable		x	x	x	6	10	10	10	6	10	6	6	10	3	10	3		Oc1c2ccccc2nc2cc3c(cc12)nc1ccc(Cl)c(Cl)c1c3O	C20H10Cl2N2O2	381.2	4.97	12	-7.03	0.0103
3900-45-6	1-(6-methoxy-2-naphthyl)ethan-1-one;1-(6-methoxynaphthalen-2-yl)ethanone;1-(6-methoxy-2-naphthyl)ethanone;1-(6-methoxy-2-naphthyl)ethan-1-one 1-(6-methoxynaphthalen-2-yl)ethanone 1-(6-methoxy-2-naphthyl)ethanone	NO	NO	6	NO	NO	10	TRUE	10	1	High		FALSE	161	8	YES	YES	TRUE	TRUE	356	493		not classified	not applicable			x	x	6	6	10	10	6	10	6	6	10	6	10	6		CC(=O)c1ccc2cc(OC)ccc2c1	C13H12O2	200.22	2.93	8.565	-5.635	0.923
3905-19-9	(3-hydroxynaphthalen-2-yl)[(1e)-3-(2,2'',5,5''-tetrachloro-4''-{(1e)-3-[(3-hydroxynaphthalen-2-yl)carbonyl]triaz-1-en-1-yl}-1,1':4',1''-terphenyl-4-yl)triaz-1-en-1-yl]methanone	NO	NO	6	NO	NO	10	TRUE	10	1	High		FALSE	161	8	YES	YES	TRUE	TRUE	356	493		not classified	not applicable		x	x		10	10	6	6	6	6	10	10	3	10	3	10		Oc1cc2ccccc2cc1C(=O)N=NNc1cc(Cl)c(-c2ccc(-c3cc(Cl)c(NN=NC(=O)c4cc5ccccc5cc4O)cc3Cl)cc2)cc1Cl	C40H24Cl4N6O4	794.44	12	12	0	2030
4051-63-2	[1,1’-bianthracene]-9,9’,10,10’-tetrone, 4,4’-diamino-;4,4'-diamino[1,1'-bianthracene]-9,9',10,10'-tetraone;4,4'-diamino-1,1'-bianthracene-9,9',10,10'-tetrone;[1,1'-bianthracene]-9,9',10,10'-tetrone, 4,4'-diamino-;1,1'-bianthracene -9,9',10,10'-tetrone, 4,4'-diamino-;Х1,1'-bianthraceneе-9,9',10,10'-tetrone, 4,4'-diamino-;1,1'-bianthraquinone, 4,4'-diamino-;[1,1’-bianthracene]-9,9’,10,10’-tetrone,…	NO	NO	6	NO	NO	10	TRUE	10	1	High		FALSE	161	8	YES	YES	TRUE	TRUE	356	493		not classified	not applicable		x		x	10	10	10	10	10	10	6	6	6	6	6	6		Nc1ccc(-c2ccc(N)c3c2C(=O)c2ccccc2C3=O)c2c1C(=O)c1ccccc1C2=O	C28H16N2O4	444.42	6.83	12	-5.17	0.102
40618-31-3	2-naphthalenecarboxamide, n,n’-(2,5-dichloro-1,4-phenylene)bis[4-[(2,5-dichlorophenyl)azo]-3-hydroxy-;n,n'-(2,5-dichloro-1,4-phenylene)bis[4-[(2,5-dichlorophenyl)azo]-3-hydroxynaphthalene-2-carboxamide];n,n'-(2,5-dichlorobenzene-1,4-diyl)bis{4-[(2,5-dichlorophenyl)diazenyl]-3-hydroxynaphthalene-2-carboxamide};2-naphthalenecarboxamide, n,n'-(2,5-dichloro-1,4-phenylene)bis[4-[(2,5-dichlorophenyl)az…	NO	NO	6	NO	NO	10	TRUE	10	1	High		FALSE	161	8	YES	YES	TRUE	TRUE	356	493		not classified	not applicable		x	x		10	10	6	6	6	6	10	10	3	10	3	10		Oc1c(C(=O)Nc2cc(Cl)c(NC(=O)c3cc4ccccc4c(N=Nc4cc(Cl)ccc4Cl)c3O)cc2Cl)cc2ccccc2c1N=Nc1cc(Cl)ccc1Cl	C40H22Cl6N6O4	863.33	12	12	0	1430
41611-76-1	1,4-bis[(2-ethyl-6-methylphenyl)amino]anthraquinone;1,4-bis[(2-ethyl-6-methylphenyl)amino]anthracene-9,10-dione;9,10-anthracenedione, 1,4-bis[(2-ethyl-6-methylphenyl)amino]-;1,4-bis[(2-ethyl-6-methylphenyl)amino]-9,10-anthraquinone;1,4-bis[(2-ethyl-6-methylphenyl)amino]anthraquinone 1,4-bis[(2-ethyl-6-methylphenyl)amino]anthracene-9,10-dione 9,10-anthracenedione, 1,4-bis[(2-ethyl-6-methylphenyl)a…	NO	NO	6	NO	NO	10	TRUE	10	1	High		FALSE	161	8	YES	YES	TRUE	TRUE	356	493		not classified	not applicable		x	x		10	6	6	6	6	6	10	10	3	10	3	10		CCc1cccc(C)c1Nc1ccc(Nc2c(C)cccc2CC)c2c1C(=O)c1ccccc1C2=O	C32H30N2O2	474.57	10.76	12	-1.24	14.3
43100-47-6	[1,1':3',1''-terphenyl]-2'-ol, 5',5''''-(2,2,2-trifluoro-1-methylethylidene)bis-	NO	NO	6	NO	NO	10	TRUE	10	1	High		FALSE	161	8	YES	YES	TRUE	TRUE	356	493		not classified	not applicable		x	x		10	6	6	6	6	6	10	10	3	10	3	10		CC(c1cc(-c2ccccc2)c(O)c(-c2ccccc2)c1)(c1cc(-c2ccccc2)c(O)c(-c2ccccc2)c1)C(F)(F)F	C39H29F3O2	586.61	11.11	12	-0.89	26.9
4314-14-1	3h-pyrazol-3-one, 2,4-dihydro-5-methyl-2-phenyl-4-(phenylazo)-;2,4-dihydro-5-methyl-2-phenyl-4-(phenylazo)-3h-pyrazol-3-one;5-methyl-2-phenyl-4-(phenyldiazenyl)-2,4-dihydro-3h-pyrazol-3-one;sudan yellow 3g;3h-pyrazol-3-one, 2,4-dihydro-5-methyl-2-phenyl-4-(phenylazo)- 2,4-dihydro-5-methyl-2-phenyl-4-(phenylazo)-3h-pyrazol-3-one 5-methyl-2-phenyl-4-(phenyldiazenyl)-2,4-dihydro-3h-pyrazol-3-one sud…	NO	NO	6	NO	YES	10	TRUE	10	1	High		FALSE	161	8	YES	YES	TRUE	TRUE	356	493		not classified	not applicable		x	x	x	10	10	10	10	10	10	10	10	10	10	10	10		CC1C(N=Nc2ccccc2)C(=O)N(c2ccccc2)N=1	C16H14N4O	278.3	4.55	11.783	-7.233	1.02
4531-49-1	c.i. pigment yellow 17;butanamide, 2,2’-[(3,3’-dichloro[1,1’-biphenyl]-4,4’-diyl)bis(azo)]bis[n-(2-methoxyphenyl)-3-oxo-;2,2'-[(3,3'-dichloro[1,1'-biphenyl]-4,4'-diyl)bis(azo)]bis[n-(2-methoxyphenyl)-3-oxobutyramide];2,2'-[(3,3'-dichlorobiphenyl-4,4'-diyl)didiazene-2,1-diyl]bis[n-(2-methoxyphenyl)-3-oxobutanamide];butanamide, 2,2'-[(3,3'-dichloro[1,1'-biphenyl]-4,4'-diyl)bis(azo)]bis[n-(2-methoxy…	NO	NO	6	NO	NO	10	TRUE	10	1	High		FALSE	161	8	YES	YES	TRUE	TRUE	356	493		not classified	not applicable		x	x	x	10	10	10	10	10	10	6	6	10	6	10	6		CC(=O)C(C(=O)Nc1ccccc1OC)N=Nc1ccc(-c2ccc(N=NC(C(C)=O)C(=O)Nc3ccccc3OC)c(Cl)c2)cc1Cl	C34H30Cl2N6O6	689.52	6.09	12	-5.91	0.52
486455-65-6	(2s)-n, n’-dibutyl-2-(2-ethylhexanamido)pentanediamide;n-2-ethylhexanoyl-l-glutamic acid dibutylamide;dibutyl ethylhexanoyl-l-glutamide;(2s)-n, n’-dibutyl-2-(2-ethylhexanamido)pentanediamide n-2-ethylhexanoyl-l-glutamic acid dibutylamide dibutyl ethylhexanoyl-l-glutamide	NO	NO	6	NO	NO	10	TRUE	10	1	High		FALSE	161	8	YES	YES	TRUE	TRUE	356	493		not classified	not applicable		x	x	x	10	10	10	10	10	10	10	10	10	6	10	6		CCCCC(CC)C(=O)NC(CCC(=O)NCCCC)C(=O)NCCCC	C21H41N3O3	383.55	3.67	12	-8.33	0.00651
4948-15-6	anthra[2,1,9-def:6,5,10-d’e’f’]diisoquinoline-1,3,8,10(2h,9h)-tetrone, 2,9-bis(3,5-dimethylphenyl)-;2,9-bis(3,5-dimethylphenyl)anthra[2,1,9-def:6,5,10-d'e'f']diisoquinoline-1,3,8,10(2h,9h)-tetrone;2,9-bis(3,5-dimethylphenyl)isoquino[4',5',6':6,5,10]anthra[2,1,9-def]isoquinoline-1,3,8,10(2h,9h)-tetrone;anthra[2,1,9-def:6,5,10-d'e'f']diisoquinoline-1,3,8,10(2h,9h)-tetrone, 2,9-bis(3,5-dimethylpheny…	NO	NO	6	NO	NO	10	TRUE	10	1	High		FALSE	161	8	YES	YES	TRUE	TRUE	356	493		not classified	not applicable		x	x	x	10	10	10	10	10	10	10	10	10	10	10	10		Cc1cc(C)cc(N2C(=O)c3ccc4c5ccc6c7c5c(ccc7C(=O)N(c5cc(C)cc(C)c5)C6=O)c5ccc(C2=O)c3c45)c1	C40H26N2O4	598.62	7.36	12	-4.64	6.07
49707-23-5	2-propenamide, n-(2,2-dimethoxyethyl)-;n-(2,2-dimethoxyethyl)prop-2-enamide;n-(2,2-dimethoxyethyl)-2-propenamide;naaada;n-acryloylaminoacetaldehyddimethylacetal;n-(2,2-dimethoxyethyl)acrylamide;2-propenamide, n-(2,2-dimethoxyethyl)- n-(2,2-dimethoxyethyl)prop-2-enamide n-(2,2-dimethoxyethyl)-2-propenamide naaada n-acryloylaminoacetaldehyddimethylacetal n-(2,2-dimethoxyethyl)acrylamide	NO	NO	6	NO	YES	10	TRUE	10	1	High		FALSE	161	8	YES	YES	TRUE	TRUE	356	493		not classified	not applicable			x	x	6	6	10	10	10	10	10	10	10	10	10	10		COC(CNC(=O)C=C)OC	C7H13NO3	159.18	-0.95	8.367	-9.317	0.0055
497-18-7	carbonic dihydrazide;carbonohydrazide;carbohydrazide;r-2581;carbonic dihydrazide carbonohydrazide carbohydrazide r-2581	NO	NO	6	NO	NO	10	TRUE	10	1	High		FALSE	161	8	YES	YES	TRUE	TRUE	356	493		not classified	not applicable			x	x	6	3	10	10	10	10	6	6	10	3	10	6		NNC(=O)NN	CH6N4O	90.084	-2	8.854	-10.854	6.77e-05
505-32-8	isophytol;1-hexadecen-3-ol, 3,7,11,15-tetramethyl-;3,7,11,15-tetramethylhexadec-1-en-3-ol;1-hexadecen-3-ol, 3,7,11,15-tetramethyl-van;isophytol 1-hexadecen-3-ol, 3,7,11,15-tetramethyl- 3,7,11,15-tetramethylhexadec-1-en-3-ol 1-hexadecen-3-ol, 3,7,11,15-tetramethyl-van	NO (Toxicity Score of 1 confirmed)	NO	6	NO	NO	10	TRUE	10	1	Low		FALSE	161	8	YES	YES	TRUE	TRUE	356	493		OTH-NO	REPR			x		6	6	6	6	6	6	10	10	3	6	3	6		CC(C)CCCC(C)CCCC(C)CCCC(C)(O)C=C	C20H40O	296.52	8.23	9.778	-1.548	12.6
51202-86-9	2,2'-(1,4-phenylene)bis[4-[(4-methoxyphenyl)methylene]oxazol-5(4h)-one];2,2'-benzene-1,4-diylbis[4-(4-methoxybenzylidene)-1,3-oxazol-5(4h)-one];5(4h)-oxazolone, 2,2'-(1,4-phenylene)bis[4-[(4-methoxyphenyl)methylene]-	NO	NO	6	NO	YES	10	TRUE	10	1	High		FALSE	161	8	YES	YES	TRUE	TRUE	356	493		not classified	not applicable		x	x	x	10	10	10	10	10	10	10	10	10	10	10	10		COc1ccc(C=C2C(=O)OC(c3ccc(C4=NC(=Cc5ccc(OC)cc5)C(=O)O4)cc3)=N2)cc1	C28H20N2O6	480.45	5.14	12	-6.86	0.566
51765-51-6	n-(2-phenoxyphenyl)methanesulphonamide;n-(2-phenoxyphenyl)methanesulfonamide	NO	NO	6	NO	NO	10	TRUE	10	1	High		FALSE	161	8	YES	YES	TRUE	TRUE	356	493		not classified	not applicable			x	x	6	6	10	10	10	10	6	6	10	10	10	6		CS(=O)(=O)Nc1ccccc1Oc1ccccc1	C13H13NO3S	263.3	2.4	8.382	-5.982	0.438
51772-35-1	1-naphthalenamine, n-[(1,1,3,3-tetramethylbutyl)phenyl]-;n-[(1,1,3,3-tetramethylbutyl)phenyl]naphthalen-1-amine;n-[2-(2,4,4-trimethylpentan-2-yl)phenyl]naphthalen-1-amine;1-naphthalenamine, n-[(1,1,3,3-tetramethylbutyl)phenyl]- n-[(1,1,3,3-tetramethylbutyl)phenyl]naphthalen-1-amine n-[2-(2,4,4-trimethylpentan-2-yl)phenyl]naphthalen-1-amine	NO	NO	6	NO	NO	10	TRUE	10	1	High		FALSE	161	8	YES	YES	TRUE	TRUE	356	493		not classified	not applicable		x	x	x	10	10	10	10	10	10	10	10	6	10	10	10		CC(C)(C)CC(C)(C)c1ccccc1Nc1cccc2ccccc12	C24H29N	331.48	8.23	12	-3.77	193
518-47-8	spiro[isobenzofuran-1(3h),9’-[9h]xanthen]-3-one, 3’,6’-dihydroxy-, disodium salt;disodium 2-(3-oxo-6-oxidoxanthen-9-yl)benzoate;acid yellow 73;spiro[isobenzofuran-1(3h),9’-[9h]xanthen]-3-one, 3’,6’-dihydroxy-, disodium salt disodium 2-(3-oxo-6-oxidoxanthen-9-yl)benzoate acid yellow 73	NO (Toxicity Score of 1 confirmed)	NO	6	NO	NO	10	TRUE	10	1	Low		FALSE	161	8	YES	YES	TRUE	TRUE	356	493		OTH-NO	MUTA		x	x	x	10	10	10	10	10	10	10	10	10	6	10	6		Oc1ccc2c(c1)Oc1cc(O)ccc1C21c2ccccc2C(=O)O1	C20H12O5	332.29	3.35	12	-8.65	0.00428
51920-12-8	2-naphthalenecarboxamide, n-(2,3-dihydro-2-oxo-1h-benzimidazol-5-yl)-3-hydroxy-4-[[2-methoxy-5-methyl-4-[(methylamino)sulfonyl]phenyl]azo]-;n-(2,3-dihydro-2-oxo-1h-benzimidazol-5-yl)-3-hydroxy-4-[[2-methoxy-5-methyl-4-[(methylamino)sulphonyl]phenyl]azo]naphthalene-2-carboxamide;3-hydroxy-4-{[2-methoxy-5-methyl-4-(methylsulfamoyl)phenyl]diazenyl}-n-(2-oxo-2,3-dihydro-1h-benzimidazol-5-yl)naphthale…	NO	NO	6	NO	YES	10	TRUE	10	1	High		FALSE	161	8	YES	YES	TRUE	TRUE	356	493		not classified	not applicable		x	x	x	10	10	10	10	10	10	6	6	10	6	10	6		Cc1cc(N=Nc2c3ccccc3cc(C(=O)Nc3ccc4c(c3)N=C(O)N4)c2O)c(OC)cc1S(=O)(=O)NC	C27H24N6O6S	560.56	6.27	12	-5.73	0.0723
52238-92-3	2-naphthalenecarboxamide, n,n’-(2,5-dichloro-1,4-phenylene)bis[4-[[2-chloro-5-(trifluoromethyl)phenyl]azo]-3-hydroxy-;n,n'-(2,5-dichloro-1,4-phenylene)bis[4-[[2-chloro-5-(trifluoromethyl)phenyl]azo]-3-hydroxynaphthalene-2-carboxamide];n,n'-(2,5-dichlorobenzene-1,4-diyl)bis(4-{[2-chloro-5-(trifluoromethyl)phenyl]diazenyl}-3-hydroxynaphthalene-2-carboxamide);2-naphthalenecarboxamide, n,n'-(2,5-dich…	NO	NO	6	NO	YES	10	TRUE	10	1	High		FALSE	161	8	YES	YES	TRUE	TRUE	356	493		not classified	not applicable		x	x		10	10	6	6	6	6	10	10	3	10	3	10		Oc1c(C(=O)Nc2cc(Cl)c(NC(=O)c3cc4ccccc4c(N=Nc4cc(C(F)(F)F)ccc4Cl)c3O)cc2Cl)cc2ccccc2c1N=Nc1cc(C(F)(F)F)ccc1Cl	C42H22Cl4F6N6O4	930.43	12	12	0	5040
52603-48-2	2,4-thiophenedicarbonitrile, 5-amino-3-methyl-;5-amino-3-methyl-2,4-thiophenedicarbonitrile;2,4-thiophenedicarbonitrile, 5-amino-3-methyl- 5-amino-3-methyl-2,4-thiophenedicarbonitrile	NO	NO	6	NO	YES	10	TRUE	10	1	High		FALSE	161	8	YES	YES	TRUE	TRUE	356	493		not classified	not applicable		x	x	x	6	10	10	10	10	10	6	6	10	6	10	10		CC1=C(C#N)SC(N)=C1C#N	C7H5N3S	163.19	1.09	9.449	-8.359	0.0136
5280-68-2	2-naphthalenecarboxamide, n-(4-chloro-2,5-dimethoxyphenyl)-3-hydroxy-4-[[2-methoxy-5-[(phenylamino)carbonyl]phenyl]azo]-;n-(4-chloro-2,5-dimethoxyphenyl)-3-hydroxy-4-[[2-methoxy-5-[(phenylamino)carbonyl]phenyl]azo]naphthalene-2-carboxamide;n-(4-chloro-2,5-dimethoxyphenyl)-3-hydroxy-4-{[2-methoxy-5-(phenylcarbamoyl)phenyl]diazenyl}naphthalene-2-carboxamide;2-naphthalenecarboxamide, n-(4-chloro-2,5…	NO	NO	6	NO	NO	10	TRUE	10	1	High		FALSE	161	8	YES	YES	TRUE	TRUE	356	493		not classified	not applicable		x	x	x	10	10	10	10	10	10	10	10	6	10	6	10		COc1ccc(C(=O)Nc2ccccc2)cc1N=Nc1c2ccccc2cc(C(=O)Nc2cc(OC)c(Cl)cc2OC)c1O	C33H27ClN4O6	611.02	8.32	12	-3.68	7.31
5280-78-4	2-naphthalenecarboxamide, n,n’-(2-chloro-1,4-phenylene)bis[4-[(2,5-dichlorophenyl)azo]-3-hydroxy-;n,n'-(2-chloro-1,4-phenylene)bis[4-[(2,5-dichlorophenyl)azo]-3-hydroxynaphthalene-2-carboxamide];n,n'-(2-chlorobenzene-1,4-diyl)bis{4-[(2,5-dichlorophenyl)diazenyl]-3-hydroxynaphthalene-2-carboxamide};2-naphthalenecarboxamide, n,n'-(2-chloro-1,4-phenylene)bis[4-[(2,5-dichlorophenyl)azo]-3-hydroxy-;2-…	NO	NO	6	NO	NO	10	TRUE	10	1	High		FALSE	161	8	YES	YES	TRUE	TRUE	356	493		not classified	not applicable		x	x		10	10	6	6	6	6	10	10	3	10	3	10		Oc1c(C(=O)Nc2ccc(NC(=O)c3cc4ccccc4c(N=Nc4cc(Cl)ccc4Cl)c3O)cc2Cl)cc2ccccc2c1N=Nc1cc(Cl)ccc1Cl	C40H23Cl5N6O4	828.88	12	12	0	1280
5280-80-8	3,3'-[(2,5-dimethyl-p-phenylene)bis[imino(1-acetyl-2-oxoethylene)azo]]bis[4-chloro-n-(5-chloro-o-tolyl)benzamide];3,3'-{(2,5-dimethylbenzene-1,4-diyl)bis[imino(1,3-dioxobutane-2,1-diyl)diazene-2,1-diyl]}bis[4-chloro-n-(5-chloro-2-methylphenyl)benzamide];benzamide, 3,3'-[(2,5-dimethyl-1,4-phenylene)bis[imino(1-acetyl-2-oxo-2,1-ethanediyl)azo]]bis[4-chloro-n-(5-chloro-2-methylphenyl)-;3,3'-[(2,5-di…	NO	NO	6	NO	NO	10	TRUE	10	1	High		FALSE	161	8	YES	YES	TRUE	TRUE	356	493		not classified	not applicable		x	x	x	10	10	10	10	10	10	6	6	6	10	10	6		Cc1ccc(Cl)cc1NC(=O)c1ccc(Cl)c(N=NC(=O)C(C(C)=O)Nc2cc(C)c(NC(C(C)=O)C(=O)N=Nc3cc(C(=O)Nc4cc(Cl)ccc4C)ccc3Cl)cc2C)c1	C44H38Cl4N8O6	916.6	7.56	12	-4.44	0.758
52846-56-7	n-(2,3-dihydro-2-oxo-1h-benzimidazol-5-yl)-2-[(4-nitrophenyl)azo]-3-oxobutyramide;2-[(4-nitrophenyl)diazenyl]-3-oxo-n-(2-oxo-2,3-dihydro-1h-benzimidazol-5-yl)butanamide;butanamide, n-(2,3-dihydro-2-oxo-1h-benzimidazol-5-yl)-2-[(4-nitrophenyl)azo]-3-oxo-;n-(2,3-dihydro-2-oxo-1h-benzimidazol-5-yl)-2-[(4-nitrophenyl)azo]-3-oxobutyramide 2-[(4-nitrophenyl)diazenyl]-3-oxo-n-(2-oxo-2,3-dihydro-1h-benzi…	NO	NO	6	NO	YES	10	TRUE	10	1	High		FALSE	161	8	YES	YES	TRUE	TRUE	356	493		not classified	not applicable		x	x	x	10	10	10	10	10	10	10	10	10	10	10	10		CC(=O)C(C(=O)Nc1ccc2c(c1)N=C(O)N2)N=Nc1ccc(N(=O)=O)cc1	C17H14N6O5	382.32	2.9	12	-9.1	0.0104
54079-53-7	propanedinitrile, [[4-[[2-(4-cyclohexylphenoxy)ethyl]ethylamino]-2-methylphenyl]methylene]-;[[4-[[2-(4-cyclohexylphenoxy)ethyl]ethylamino]-2-methylphenyl]methylene]malononitrile;(4-{[2-(4-cyclohexylphenoxy)ethyl](ethyl)amino}-2-methylbenzylidene)propanedinitrile;propanedinitrile, 4- 2-(4-cyclohexylphenoxy)ethyl ethylamino -2-methylphenyl methylene -;propanedinitrile, 4- 2-(4-cyclohexylphenoxy)eth…	NO	NO	6	NO	NO	10	TRUE	10	1	High		FALSE	161	8	YES	YES	TRUE	TRUE	356	493		not classified	not applicable		x	x	x	10	10	10	10	10	10	10	10	10	10	10	10		CCN(CCOc1ccc(C2CCCCC2)cc1)c1ccc(C=C(C#N)C#N)c(C)c1	C27H31N3O	413.53	7.88	12	-4.12	9.86
5471-90-9	benzenesulfonamide, n-(4-hydroxyphenyl)-;4'-hydroxy-benzenesulfonanlide;4-benzenesulfonamido phenol;n-(4-hydroxyphenyl)benzenesulfonamide;p-benzenesulfonamido phenol;benzenesulfonamide, n-(4-hydroxyphenyl)- 4'-hydroxy-benzenesulfonanlide 4-benzenesulfonamido phenol n-(4-hydroxyphenyl)benzenesulfonamide p-benzenesulfonamido phenol	NO	NO	6	NO	NO	10	TRUE	10	1	High		FALSE	161	8	YES	YES	TRUE	TRUE	356	493		not classified	not applicable		x	x	x	10	10	10	10	10	10	10	10	10	10	10	10		Oc1ccc(NS(=O)(=O)c2ccccc2)cc1	C12H11NO3S	249.27	2.15	11.155	-9.005	0.0893
5521-31-3	anthra[2,1,9-def:6,5,10-d’e’f’]diisoquinoline-1,3,8,10(2h,9h)-tetrone, 2,9-dimethyl-;2,9-dimethylanthra[2,1,9-def:6,5,10-d'e'f']diisoquinoline-1,3,8,10(2h,9h)-tetrone;anthra[2,1,9-def:6,5,10-d'e'f']diisoquinoline-1,3,8,10(2h,9h)-tetrone, 2,9-dimethyl-;2,9-dimethylisoquino[4',5',6':6,5,10]anthra[2,1,9-def]isoquinoline-1,3,8,10(2h,9h)-tetrone;anthra 2,1,9-def:6,5,10-d'e'f' diisoquinoline-1,3,8,10(2…	NO	NO	6	NO	NO	10	TRUE	10	1	High		FALSE	161	8	YES	YES	TRUE	TRUE	356	493		not classified	not applicable		x	x	x	10	10	10	10	10	10	10	10	10	10	10	10		CN1C(=O)c2ccc3c4ccc5c6c4c(ccc6C(=O)N(C)C5=O)c4ccc(C1=O)c2c34	C26H14N2O4	418.38	4.18	12	-7.82	0.447
55290-62-5	4-[(1-butyl-5-cyano-2-hydroxy-4-methyl-6-oxo-1,6-dihydropyridin-3-yl)diazenyl]-n-(2-ethylhexyl)benzenesulfonamide	NO	NO	6	NO	NO	10	TRUE	10	1	High		FALSE	161	8	YES	YES	TRUE	TRUE	356	493		not classified	not applicable		x	x	x	10	10	10	10	10	10	10	10	10	10	10	10		CCCCC(CC)CNS(=O)(=O)c1ccc(NN=C2C(C)=C(C#N)C(=O)N(CCCC)C2=O)cc1	C25H35N5O4S	501.62	5.02	12	-6.98	3.65
5580-57-4	3,3'-[(2-chloro-5-methyl-p-phenylene)bis[imino(1-acetyl-2-oxoethylene)azo]]bis[4-chloro-n-(3-chloro-o-tolyl)benzamide];3,3'-{(2-chloro-5-methylbenzene-1,4-diyl)bis[imino(1,3-dioxobutane-2,1-diyl)diazene-2,1-diyl]}bis[4-chloro-n-(3-chloro-2-methylphenyl)benzamide];benzamide, 3,3'-[(2-chloro-5-methyl-1,4-phenylene)bis[imino(1-acetyl-2-oxo-2,1-ethanediyl)azo]]bis[4-chloro-n-(3-chloro-2-methylphenyl)…	NO	NO	6	NO	NO	10	TRUE	10	1	High		FALSE	161	8	YES	YES	TRUE	TRUE	356	493		not classified	not applicable		x	x	x	10	10	10	10	10	10	6	6	10	10	10	10		Cc1cc(NC(C(C)=O)C(=O)N=Nc2cc(C(=O)Nc3cccc(Cl)c3C)ccc2Cl)c(Cl)cc1NC(C(C)=O)C(=O)N=Nc1cc(C(=O)Nc2cccc(Cl)c2C)ccc1Cl	C43H35Cl5N8O6	937.02	7.65	12	-4.35	1.39
5590-18-1	3,3'-(1,4-phenylenediimino)bis[4,5,6,7-tetrachloro-1h-isoindol-1-one];3,3'-(benzene-1,4-diyldiimino)bis(4,5,6,7-tetrachloro-1h-isoindol-1-one);1h-isoindol-1-one, 3,3'-(1,4-phenylenediimino)bis[4,5,6,7-tetrachloro-	NO	NO	6	NO	NO	10	TRUE	10	1	High		FALSE	161	8	YES	YES	TRUE	TRUE	356	493		not classified	not applicable		x	x	x	10	10	10	10	10	10	10	10	6	10	6	10		O=C1c2c(Cl)c(Cl)c(Cl)c(Cl)c2C(Nc2ccc(NC3c4c(Cl)c(Cl)c(Cl)c(Cl)c4C(=O)N=3)cc2)=N1	C22H6Cl8N4O2	641.92	9.05	12	-2.95	662
57206-89-0	butanamide, n-(4-chlorophenyl)-2-[(4-methyl-2-nitrophenyl)azo]-3-oxo-;n-(4-chlorophenyl)-2-[(4-methyl-2-nitrophenyl)azo]-3-oxobutyramide;n-(4-chlorophenyl)-2-[(4-methyl-2-nitrophenyl)diazenyl]-3-oxobutanamide	NO	NO	6	NO	YES	10	TRUE	10	1	High		FALSE	161	8	YES	YES	TRUE	TRUE	356	493		not classified	not applicable		x	x	x	10	10	10	10	10	10	10	10	10	10	10	10		Cc1ccc(N=NC(C(C)=O)C(=O)Nc2ccc(Cl)cc2)c(N(=O)=O)c1	C17H15ClN4O4	374.77	4.58	12	-7.42	0.442
574-93-6	29h,31h-phthalocyanine;29h,30h-phthalocyanine;29h,31h-phthalocyanine 29h,30h-phthalocyanine	NO	NO	6	NO	YES	10	TRUE	10	1	High		FALSE	161	8	YES	YES	TRUE	TRUE	356	493		not classified	not applicable		x	x	x	10	10	6	10	10	10	10	10	6	10	6	10		C1=CC=CC2C1=C1NC=2N=C2c3ccccc3C(=N2)N=C2c3ccccc3C(N2)=NC2c3ccccc3C(=N1)N=2	C32H18N8	514.52	9.85	12	-2.15	15800
57-88-5	cholesterol;cholest-5-en-3-ol (3?)-;(3beta)-cholest-5-en-3-ol;cholest-5-en-3-ol, (3.beta.)-;cholest-5-en-3-ol (3.beta.)-;cholesterol [usan:jan];cholest-5-en-3-ol;cholest-5-en-3-ol (3ß)-;3 beta-cholest-5-en-3-ol;cholesterol cholest-5-en-3-ol (3?)- (3beta)-cholest-5-en-3-ol cholest-5-en-3-ol, (3.beta.)- cholest-5-en-3-ol (3.beta.)- cholesterol [usan:jan] cholest-5-en-3-ol cholest-5-en-3-ol (3ß)- 3 …	NO (Toxicity Score of 1 confirmed)	NO	6	NO	NO	10	TRUE	10	1	Low		FALSE	161	8	YES	YES	TRUE	TRUE	356	493		OTH-NO	REPR		x	x	x	10	10	6	10	10	10	10	10	6	10	6	10		CC(C)CCCC(C)C1CCC2C3CC=C4CC(O)CCC4(C)C3CCC12C	C27H46O	386.63	8.74	10.906	-2.166	162
58-08-2	caffeine;1,3,7-trimethyl-3,7-dihydro-purine-2,6-dione;1h-purine-2,6-dione, 3,7-dihydro-1,3,7-trimethyl-;1,3,7-trimethyl-3,7-dihydro-1h-purine-2,6-dione;3,7-dihydro-1,3,7-trimethyl-1h-pyrine-2,6-dione;caffeine (1h-purine-2,6-dione, 3,7-dihydro-1,3,7-trimethyl-);caffeine 1,3,7-trimethyl-3,7-dihydro-purine-2,6-dione 1h-purine-2,6-dione, 3,7-dihydro-1,3,7-trimethyl- 1,3,7-trimethyl-3,7-dihydro-1h-pur…	NO	NO	6	NO	NO	10	TRUE	10	1	High		FALSE	161	8	YES	YES	TRUE	TRUE	356	493		not classified	not applicable			x	x	6	6	10	10	10	10	10	10	10	10	10	10		CN1C=NC2=C1C(=O)N(C)C(=O)N2C	C8H10N4O2	194.19	-0.07	8.765	-8.835	0.0218
58-55-9	theophylline;theophyllin;1,3-dimethyl-3,9-dihydro-purine-2,6-dione;1,3-dimethyl-3,7-dihydro-purine-2,6-dione;theophilline;1h-purine-2,6-dione, 3,7-dihydro-1,3-dimethyl-;1,3-dimethyl-3,7-dihydro-1h-purine-2,6-dione;3,7-dihydro-1,3-dimethyl-1h-purine-2,6-dione;theophylline theophyllin 1,3-dimethyl-3,9-dihydro-purine-2,6-dione 1,3-dimethyl-3,7-dihydro-purine-2,6-dione theophilline 1h-purine-2,6-dion…	NO	NO	6	NO	YES	10	TRUE	10	1	High		FALSE	161	8	YES	YES	TRUE	TRUE	356	493		not classified	not applicable		x	x	x	10	10	10	10	10	10	10	10	10	10	10	10		CN1C2=C(C(=O)N(C)C1=O)N=CN2	C7H8N4O2	180.16	-0.02	10.123	-10.143	0.0137
591-27-5	3-aminophenol (3-hydroxyaniline);3-aminophenol;phenol, 3-amino-;m-aminophenol;3-amino-phenol;3-hydroxy-aniline;phenol, m-amino-;aminophenol;3-aminophenol (3-hydroxyaniline) 3-aminophenol phenol, 3-amino- m-aminophenol 3-amino-phenol 3-hydroxy-aniline phenol, m-amino- aminophenol	NO (Toxicity Score of 1 confirmed)	NO	6	NO	NO	10	TRUE	10	1	Low		FALSE	161	8	YES	YES	TRUE	TRUE	356	493		OTH-NO	STOT RE			x	x	6	6	10	10	10	10	6	6	10	6	10	6		Nc1cccc(O)c1	C6H7NO	109.12	0.21	8.302	-8.092	0.0133
59447-55-1	(pentabromophenyl)methyl acrylate;pentabromobenzyl prop-2-enoate;2-propenoic acid, (pentabromophenyl)methyl ester;pentabromobenzyl acrylate;(pentabromophenyl)methyl acrylate pentabromobenzyl prop-2-enoate 2-propenoic acid, (pentabromophenyl)methyl ester pentabromobenzyl acrylate	NO	NO	6	NO	YES	10	TRUE	10	1	High		FALSE	161	8	YES	YES	TRUE	TRUE	356	493		not classified	not applicable		x	x	x	10	10	10	10	10	10	6	6	10	10	10	6		C=CC(=O)OCc1c(Br)c(Br)c(Br)c(Br)c1Br	C10H5Br5O2	556.69	6.89	12	-5.11	0.804
59487-23-9	2-naphthalenecarboxamide, 4-[[5-[[[4-(aminocarbonyl)phenyl]amino]carbonyl]-2-methoxyphenyl]azo]-n-(5-chloro-2,4-dimethoxyphenyl)-3-hydroxy-;4-[[5-[[[4-(aminocarbonyl)phenyl]amino]carbonyl]-2-methoxyphenyl]azo]-n-(5-chloro-2,4-dimethoxyphenyl)-3-hydroxynaphthalene-2-carboxamide;4-({5-[(4-carbamoylphenyl)carbamoyl]-2-methoxyphenyl}diazenyl)-n-(5-chloro-2,4-dimethoxyphenyl)-3-hydroxynaphthalene-2-ca…	NO	NO	6	NO	YES	10	TRUE	10	1	High		FALSE	161	8	YES	YES	TRUE	TRUE	356	493		not classified	not applicable		x	x	x	10	10	10	10	10	10	6	6	10	10	10	10		COc1ccc(C(=O)Nc2ccc(C(N)=O)cc2)cc1N=Nc1c2ccccc2cc(C(=O)Nc2cc(Cl)c(OC)cc2OC)c1O	C34H28ClN5O7	654.04	7.07	12	-4.93	1.29
597-82-0	phosphorothioic acid, o,o,o-triphenyl ester;o,o,o-triphenyl phosphorothioate;phenyl phosphorothioate, ((pho)3ps);o,o,o-triphenyl thiophosphate;phosphorothioic acid, o,o,o-triphenyl ester o,o,o-triphenyl phosphorothioate phenyl phosphorothioate, ((pho)3ps) o,o,o-triphenyl thiophosphate	NO (Toxicity Score of 1 confirmed)	NO	6	NO	NO	10	TRUE	10	1	Low		FALSE	161	8	YES	YES	TRUE	TRUE	356	493		OTH-NO	REPR		x		x	10	10	10	10	10	10	6	6	6	6	6	6		S=P(Oc1ccccc1)(Oc1ccccc1)Oc1ccccc1	C18H15O3PS	342.33	6.47	10.094	-3.624	4.71
60047-17-8	linalool oxide;2-furanmethanol, 5-ethenyltetrahydro-?,?,5-trimethyl-;2-(tetrahydro-5-methyl-5-vinyl-2-furyl)propan-2-ol;2-(5-ethenyl-5-methyltetrahydrofuran-2-yl)propan-2-ol;2-furanmethanol, 5-ethenyltetrahydro-.alpha.,.alpha.,5-trimethyl-;2-furanmethanol, 5-ethenyltetrahydro-alpha,alpha,5-trimethyl-	NO	NO	6	NO	NO	10	TRUE	10	1	High		FALSE	161	8	YES	YES	TRUE	TRUE	356	493		not classified	not applicable			x		6	6	6	6	6	6	6	6	10	6	10	6		CC(C)(O)C1CCC(C)(C=C)O1	C10H18O2	170.24	2.43	8.718	-6.288	0.246
61320-65-8	2-thiophenecarboxylic acid, 5-amino-4-cyano-3-methyl-, methyl ester;methyl 5-amino-4-cyano-3-methylthiophene-2-carboxylate;2-thiophenecarboxylic acid, 5-amino-4-cyano-3-methyl-, methyl ester methyl 5-amino-4-cyano-3-methylthiophene-2-carboxylate	NO	NO	6	NO	YES	10	TRUE	10	1	High		FALSE	161	8	YES	YES	TRUE	TRUE	356	493		not classified	not applicable		x	x	x	6	10	10	10	10	10	6	6	10	6	10	6		CC1=C(C(=O)OC)SC(N)=C1C#N	C8H8N2O2S	196.22	1.38	9.917	-8.537	0.00293
615-66-7	2-chloro-p-phenylenediamine;o-chloro-p-phenylenediamine;2-chlorobenzene-1,4-diamine;1,4-benzenediamine, 2-chloro-;p-phenylenediamine, 2-chloro-;2-chloro-1,4-benzenediamine	NO	NO	6	NO	NO	10	TRUE	10	1	High		FALSE	161	8	YES	YES	TRUE	TRUE	356	493		not classified	not applicable			x	x	6	6	6	10	10	6	6	6	10	6	10	6		Nc1ccc(N)cc1Cl	C6H7ClN2	142.58	0.25	7.94	-7.69	0.0222
61847-48-1	benzoic acid, 4-[[(2,5-dichlorophenyl)amino]carbonyl]-2-[[2-hydroxy-3-[[(2-methoxyphenyl)amino]carbonyl]-1-naphthalenyl]azo]-, methyl ester;methyl 4-[[(2,5-dichlorophenyl)amino]carbonyl]-2-[[2-hydroxy-3-[[(2-methoxyphenyl)amino]carbonyl]-1-naphthyl]azo]benzoate;methyl 4-[(2,5-dichlorophenyl)carbamoyl]-2-({2-hydroxy-3-[(2-methoxyphenyl)carbamoyl]naphthalen-1-yl}diazenyl)benzoate;benzoic acid, 4- (…	NO	NO	6	NO	NO	10	TRUE	10	1	High		FALSE	161	8	YES	YES	TRUE	TRUE	356	493		not classified	not applicable		x	x	x	10	10	10	10	10	10	6	6	6	10	6	6		COc1ccccc1NC(=O)c1cc2ccccc2c(N=Nc2cc(C(=O)Nc3cc(Cl)ccc3Cl)ccc2C(=O)OC)c1O	C33H24Cl2N4O6	643.45	8.08	12	-3.92	1.09
63187-91-7	1,4-dioxaspiro[4.5]decane-2-methanol, 9-methyl-6-(1-methylethyl)-;6-isopropyl-9-methyl-1,4-dioxaspiro-[4,5]-decane-2-methanol;dl-menthone 1,2-glycerol ketal	NO	NO	6	NO	NO	10	TRUE	10	1	High		FALSE	161	8	YES	YES	TRUE	TRUE	356	493		not classified	not applicable		x	x	x	10	10	10	10	10	10	10	10	10	10	10	10		CC(C)C1CCC(C)CC11OCC(CO)O1	C13H24O3	228.32	4.18	10.782	-6.602	2.47
6358-37-8	butanamide, 2,2’-[(3,3’-dichloro[1,1’-biphenyl]-4,4’-diyl)bis(azo)]bis[n-(4-methylphenyl)-3-oxo-;2,2'-[(3,3'-dichloro[1,1'-biphenyl]-4,4'-diyl)bis(azo)]bis[n-(4-methylphenyl)-3-oxobutyramide];2,2'-[(3,3'-dichlorobiphenyl-4,4'-diyl)didiazene-2,1-diyl]bis[n-(4-methylphenyl)-3-oxobutanamide];butanamide, 2,2'-[(3,3'-dichloro[1,1'-biphenyl]-4,4'-diyl)bis(azo)]bis[n-(4-methylphenyl)-3-oxo-;butanamide, …	NO	NO	6	NO	NO	10	TRUE	10	1	High		FALSE	161	8	YES	YES	TRUE	TRUE	356	493		not classified	not applicable		x	x	x	10	10	10	10	10	10	6	6	6	10	6	10		Cc1ccc(NC(=O)C(C(C)=O)N=Nc2ccc(-c3ccc(N=NC(C(C)=O)C(=O)Nc4ccc(C)cc4)c(Cl)c3)cc2Cl)cc1	C34H30Cl2N6O4	657.52	8.15	12	-3.85	1.83
6410-32-8	2-naphthalenecarboxamide, 3-hydroxy-4-[(2-methyl-4-nitrophenyl)azo]-n-(2-methylphenyl)-;3-hydroxy-4-[(2-methyl-4-nitrophenyl)azo]-n-(o-tolyl)naphthalene-2-carboxamide;3-hydroxy-4-[(2-methyl-4-nitrophenyl)diazenyl]-n-(2-methylphenyl)naphthalene-2-carboxamide;3-hydroxy-4-[(2-methyl-4-nitrophenyl)diazenyl]-n-(2-methylphenyl)-2-naphthamide;2-naphthalenecarboxamide, 3-hydroxy-4- (2-methyl-4-nitropheny…	NO (Toxicity Score of 1 confirmed)	NO	6	NO	YES	10	TRUE	10	1	Low		FALSE	161	8	YES	YES	TRUE	TRUE	356	493		OTH-NO	MUTA		x	x	x	10	10	10	10	10	10	6	6	6	10	6	10		Cc1ccccc1NC(=O)c1cc2ccccc2c(N=Nc2ccc(N(=O)=O)cc2C)c1O	C25H20N4O4	440.43	8.22	12	-3.78	3.7
6410-41-9	2-naphthalenecarboxamide, n-(5-chloro-2,4-dimethoxyphenyl)-4-[[5-[(diethylamino)sulfonyl]-2-methoxyphenyl]azo]-3-hydroxy-;n-(5-chloro-2,4-dimethoxyphenyl)-4-[[5-[(diethylamino)sulphonyl]-2-methoxyphenyl]azo]-3-hydroxynaphthalene-2-carboxamide;n-(5-chloro-2,4-dimethoxyphenyl)-4-{[5-(diethylsulfamoyl)-2-methoxyphenyl]diazenyl}-3-hydroxynaphthalene-2-carboxamide;2-naphthalenecarboxamide, n-(5-chloro…	NO	NO	6	NO	YES	10	TRUE	10	1	High		FALSE	161	8	YES	YES	TRUE	TRUE	356	493		not classified	not applicable		x	x	x	10	10	10	10	10	10	10	10	10	10	10	10		CCN(CC)S(=O)(=O)c1ccc(OC)c(N=Nc2c3ccccc3cc(C(=O)Nc3cc(Cl)c(OC)cc3OC)c2O)c1	C30H31ClN4O7S	627.08	7.65	12	-4.35	28.1
64365-17-9	resin acids and rosin acids, hydrogenated, esters with pentaerythritol;complex mixture of esters of hydrogenated resin and rosin acids, with pentaerythritol.;resin acids and rosin acids, hydrogenated, esters with pentaerythritol complex mixture of esters of hydrogenated resin and rosin acids, with pentaerythritol.	NO	NO	6	NO	NO	10	TRUE	10	1	High		FALSE	161	8	YES	YES	TRUE	TRUE	356	493		not classified	not applicable		x	x	x	10	10	10	10	10	10	6	6	10	6	10	6		CC(C)C1CCC2C(C1)CCC1C2(C)CCCC1(C)C(=O)OCC(CO)(CO)CO	C25H44O5	424.59	5.78	12	-6.22	0.462
6448-95-9	c.i. pigment red 22;2-naphthalenecarboxamide, 3-hydroxy-4-[(2-methyl-5-nitrophenyl)azo]-n-phenyl-;3-hydroxy-4-[(2-methyl-5-nitrophenyl)azo]-n-phenylnaphthalene-2-carboxamide;3-hydroxy-4-[(2-methyl-5-nitrophenyl)diazenyl]-n-phenylnaphthalene-2-carboxamide;2-naphthalenecarboxamide, 3-hydroxy-4- (2-methyl-5-nitrophenyl)azo -n-phenyl-;2-naphthalenecarboxamide, 3-hydroxy-4-Х(2-methyl-5-nitrophenyl)azo…	NO (Toxicity Score of 1 confirmed)	NO	6	NO	NO	10	TRUE	10	1	Low		FALSE	161	8	YES	YES	TRUE	TRUE	356	493		OTH-NO	MUTA		x	x	x	10	10	10	10	10	10	6	6	6	10	6	6		Cc1ccc(N(=O)=O)cc1N=Nc1c2ccccc2cc(C(=O)Nc2ccccc2)c1O	C24H18N4O4	426.41	8.23	12	-3.77	1.52
6448-96-0	2-naphthalenecarboxamide, 3-hydroxy-4-[[2-methoxy-5-[(phenylamino)carbonyl]phenyl]azo]-n-(3-nitrophenyl)-;4-[[5-(anilino)carbonyl-2-methoxyphenyl]azo]-3-hydroxy-n-(3-nitrophenyl)naphthalene-2-carboxamide;3-hydroxy-4-{[2-methoxy-5-(phenylcarbamoyl)phenyl]diazenyl}-n-(3-nitrophenyl)naphthalene-2-carboxamide;2-naphthalenecarboxamide, 3-hydroxy-4- 2-methoxy-5- (phenylamino)carbonyl phenyl azo -n-(3-n…	NO	NO	6	NO	NO	10	TRUE	10	1	High		FALSE	161	8	YES	YES	TRUE	TRUE	356	493		not classified	not applicable		x	x	x	10	10	10	10	6	10	6	6	6	10	6	6		COc1ccc(C(=O)Nc2ccccc2)cc1N=Nc1c2ccccc2cc(C(=O)Nc2cccc(N(=O)=O)c2)c1O	C31H23N5O6	561.52	8.61	12	-3.39	1.2
6471-50-7	2-naphthalenecarboxamide, 4-[(4-chloro-2-nitrophenyl)azo]-3-hydroxy-n-(2-methylphenyl)-;4-[(4-chloro-2-nitrophenyl)azo]-3-hydroxy-n-(2-methylphenyl)naphthalene-2-carboxamide;4-[(4-chloro-2-nitrophenyl)diazenyl]-3-hydroxy-n-(2-methylphenyl)naphthalene-2-carboxamide;4-[(4-chloro-2-nitrophenyl)diazenyl]-3-hydroxy-n-(2-methylphenyl)-2-naphthamide;2-naphthalenecarboxamide, 4- (4-chloro-2-nitrophenyl)a…	NO	NO	6	NO	YES	10	TRUE	10	1	High		FALSE	161	8	YES	YES	TRUE	TRUE	356	493		not classified	not applicable		x	x	x	10	10	10	10	10	10	10	10	6	10	6	10		Cc1ccccc1NC(=O)c1cc2ccccc2c(N=Nc2ccc(Cl)cc2N(=O)=O)c1O	C24H17ClN4O4	460.85	8.31	12	-3.69	6.81
6486-23-3	butanamide, 2-[(4-chloro-2-nitrophenyl)azo]-n-(2-chlorophenyl)-3-oxo-;2-[(4-chloro-2-nitrophenyl)azo]-n-(2-chlorophenyl)-3-oxobutyramide;2-[(4-chloro-2-nitrophenyl)diazenyl]-n-(2-chlorophenyl)-3-oxobutanamide;butanamide, 2- (4-chloro-2-nitrophenyl)azo -n-(2-chlorophenyl)-3-oxo-;c.i. pigment yellow 3;butanamide, 2-Х(4-chloro-2-nitrophenyl)azoе-n-(2-chlorophenyl)-3-oxo-;acetoacetanilide, 2'-chloro-…	NO	NO	6	NO	NO	10	TRUE	10	1	High		FALSE	161	8	YES	YES	TRUE	TRUE	356	493		not classified	not applicable		x	x	x	10	10	10	10	10	10	10	10	10	10	10	10		CC(=O)C(C(=O)Nc1ccccc1Cl)N=Nc1ccc(Cl)cc1N(=O)=O	C16H12Cl2N4O4	395.18	4.12	12	-7.88	0.545
6528-34-3	butanamide, 2-[(4-methoxy-2-nitrophenyl)azo]-n-(2-methoxyphenyl)-3-oxo-;2-[(4-methoxy-2-nitrophenyl)azo]-n-(2-methoxyphenyl)-3-oxobutyramide;2-[(4-methoxy-2-nitrophenyl)diazenyl]-n-(2-methoxyphenyl)-3-oxobutanamide;butanamide, 2- (4-methoxy-2-nitrophenyl)azo -n-(2-methoxyphenyl)-3-oxo-;butanamide, 2-Х(4-methoxy-2-nitrophenyl)azoе-n-(2-methoxyphenyl)-3-oxo-;butanamide, 2-[(4-methoxy-2-nitrophenyl)…	NO	NO	6	NO	NO	10	TRUE	10	1	High		FALSE	161	8	YES	YES	TRUE	TRUE	356	493		not classified	not applicable		x	x	x	10	10	10	10	10	10	10	10	10	10	10	10		CC(=O)C(C(=O)Nc1ccccc1OC)N=Nc1ccc(OC)cc1N(=O)=O	C18H18N4O6	386.34	2.99	12	-9.01	0.102
65997-13-9	resin acids and rosin acids, hydrogenated, esters with glycerol;rosin, hydrogenated, esters with glycerol;resin acids and rosin acids, hydrogenated, esters with glycerol rosin, hydrogenated, esters with glycerol	NO	NO	6	NO	NO	10	TRUE	10	1	High		FALSE	161	8	YES	YES	TRUE	TRUE	356	493		not classified	not applicable		x	x	x	10	10	10	10	10	10	10	10	10	6	10	6		CC(C)C1CCC2C(C1)CCC1C2(C)CCCC1(C)C(=O)OCC(O)CO	C23H40O4	380.54	5.3	11.924	-6.624	0.563
6600-31-3	2,4,8,10-tetraoxaspiro[5.5]undecane, 3,9-di-3-cyclohexen-1-yl-;3,9-dicyclohex-3-enyl-2,4,8,10-tetraoxaspiro[5.5]undecane;3,9-di(cyclohex-3-en-1-yl)-2,4,8,10-tetraoxaspiro[5.5]undecane;2,4,8,10-tetraoxaspiro 5.5 undecane, 3,9-di-3-cyclohexen-1-yl-;2,4,8,10-tetraoxaspiroХ5.5еundecane, 3,9-di-3-cyclohexen-1-yl-;2,4,8,10-tetraoxaspiro[5.5]undecane, 3,9-di-3-cyclohexen-1-yl- 3,9-dicyclohex-3-enyl-2,4,…	NO	NO	6	NO	NO	10	TRUE	10	1	High		FALSE	161	8	YES	YES	TRUE	TRUE	356	493		not classified	not applicable		x	x	x	10	10	10	10	10	10	10	10	10	10	10	10		C1CC=CCC1C1OCC2(CO1)COC(C1CCC=CC1)OC2	C19H28O4	320.41	4.37	10.729	-6.359	4.95
66068-84-6	cyclohexanol, 4-(5,5,6-trimethylbicyclo[2.2.1]hept-2-yl)-;4-(5,5,6-trimethylbicyclo[2.2.1]hept-2-yl)cyclohexan-1-ol;4-(5,5,6-trimethylbicyclo[2.2.1]hept-2-yl)cyclohexanol;cyclohexanol, 4-(5,5,6-trimethylbicyclo 2.2.1 hept-2-yl)-;cyclohexanol, 4-(5,5,6-trimethylbicycloХ2.2.1еhept-2-yl)-;cyclohexanol, 4-(5,5,6-trimethylbicyclo[2.2.1]hept-2-yl)- 4-(5,5,6-trimethylbicyclo[2.2.1]hept-2-yl)cyclohexan-1…	NO	NO	6	NO	NO	10	TRUE	10	1	High		FALSE	161	8	YES	YES	TRUE	TRUE	356	493		not classified	not applicable				x	6	6	10	10	10	10	6	6	6	6	6	6		CC1C2CC(CC2C2CCC(O)CC2)C1(C)C	C16H28O	236.38	5.5	8.679	-3.179	16.8
6642-31-5	6-amino-1,3-dimethyluracil;6-amino-1,3-dimethylpyrimidine-2,4(1h,3h)-dione;2,4(1h,3h)-pyrimidinedione, 6-amino-1,3-dimethyl-;6-amino-1,3-dimethyl-2,4-pyrimidinedione;1,3-dimethyl-4-aminouracil;1,3-dimethyl-6-aminouracil;4-amino-1,3-dimethyluracil;4-amino-1,3-dimethyl-2,6-pyrimidinedione;6-amino-1,3-dimethyluracil 6-amino-1,3-dimethylpyrimidine-2,4(1h,3h)-dione 2,4(1h,3h)-pyrimidinedione, 6-amino-…	NO	NO	6	NO	YES	10	TRUE	10	1	High		FALSE	161	8	YES	YES	TRUE	TRUE	356	493		not classified	not applicable			x	x	6	6	10	10	10	10	6	6	10	6	10	6		CN1C(N)=CC(=O)N(C)C1=O	C6H9N3O2	155.15	-1.26	7.675	-8.935	0.00262
67066-88-0	dihydro-3-(2-octadecenyl)furan-2,5-dione;3-(octadec-2-en-1-yl)dihydrofuran-2,5-dione;2,5-furandione, dihydro-3-(2-octadecenyl)-	NO	NO	6	NO	NO	10	TRUE	10	1	High		FALSE	161	8	YES	YES	TRUE	TRUE	356	493		not classified	not applicable			x		6	6	6	6	6	6	10	10	3	10	3	6		CCCCCCCCCCCCCCCC=CCC1CC(=O)OC1=O	C22H38O3	350.52	9.36	10.392	-1.032	24.5
67075-37-0	anthra[2,1,9-def:6,5,10-d’e’f’]diisoquinoline-1,3,8,10(2h,9h)-tetrone, 2,9-bis(2-phenylethyl)-;2,9-bis(2-phenylethyl)anthra[2,1,9-def:6,5,10-d'e'f']diisoquinoline-1,3,8,10(2h,9h)-tetrone;2,9-bis(2-phenylethyl)isoquino[4',5',6':6,5,10]anthra[2,1,9-def]isoquinoline-1,3,8,10(2h,9h)-tetrone;anthra[2,1,9-def:6,5,10-d'e'f']diisoquinoline-1,3,8,10(2h,9h)-tetrone, 2,9-bis(2-phenylethyl)-;anthra(2,1,9-def…	NO	NO	6	NO	NO	10	TRUE	10	1	High		FALSE	161	8	YES	YES	TRUE	TRUE	356	493		not classified	not applicable		x	x	x	10	10	10	10	10	10	6	6	6	10	6	10		O=C1c2ccc3c4ccc5c6c4c(ccc6C(=O)N(CCc4ccccc4)C5=O)c4ccc(c2c34)C(=O)N1CCc1ccccc1	C40H26N2O4	598.62	8.58	12	-3.42	2.42
67990-05-0	2-naphthalenecarboxamide, n-(5-chloro-2-methoxyphenyl)-3-hydroxy-4-[[2-methoxy-5-[(phenylamino)carbonyl]phenyl]azo]-;n-(5-chloro-2-methoxyphenyl)-3-hydroxy-4-[[2-methoxy-5-[(phenylamino)carbonyl]phenyl]azo]naphthalene-2-carboxamide;n-(5-chloro-2-methoxyphenyl)-3-hydroxy-4-{[2-methoxy-5-(phenylcarbamoyl)phenyl]diazenyl}naphthalene-2-carboxamide;2-naphthalenecarboxamide, n-(5-chloro-2-methoxyphenyl…	NO (Toxicity Score of 1 confirmed)	NO	6	NO	NO	10	TRUE	10	1	Low		FALSE	161	8	YES	YES	TRUE	TRUE	356	493		OTH-NO	MUTA		x	x	x	10	10	10	10	10	10	6	6	6	10	6	10		COc1ccc(Cl)cc1NC(=O)c1cc2ccccc2c(N=Nc2cc(C(=O)Nc3ccccc3)ccc2OC)c1O	C32H25ClN4O5	580.99	8.24	12	-3.76	1.67
68134-22-5	butanamide, n-(2,3-dihydro-2-oxo-1h-benzimidazol-5-yl)-3-oxo-2-[[2-(trifluoromethyl)phenyl]azo]-;n-(2,3-dihydro-2-oxo-1h-benzimidazol-5-yl)-3-oxo-2-[[2-(trifluoromethyl)phenyl]azo]butyramide;3-oxo-n-(2-oxo-2,3-dihydro-1h-benzimidazol-5-yl)-2-{[2-(trifluoromethyl)phenyl]diazenyl}butanamide;butanamide, n-(2,3-dihydro-2-oxo-1h-benzimidazol-5-yl)-3-oxo-2-[[2-(trifluoromethyl)phenyl]azo]- n-(2,3-dihyd…	NO	NO	6	NO	NO	10	TRUE	10	1	High		FALSE	161	8	YES	YES	TRUE	TRUE	356	493		not classified	not applicable		x	x	x	10	10	10	10	10	10	10	10	10	10	10	10		CC(=O)C(C(=O)Nc1ccc2c(c1)N=C(O)N2)N=Nc1ccccc1C(F)(F)F	C18H14F3N5O3	405.32	3.47	12	-8.53	0.0623
68153-38-8	resin acids and rosin acids, esters with diethylene glycol;ester of rosin with diethylene glycol, consisting of mainly the mono- and di-esters, as the reactor is charged with a 2:1 stoichiometric ratio of reactants (rosin and diethylene glycol), and reacted at elevated temperatures until the specification is reached, typically determined by acid value indicating that most of the carboxyl groups (…	NO	NO	6	NO	NO	10	TRUE	10	1	High		FALSE	161	8	YES	YES	TRUE	TRUE	356	493		not classified	not applicable		x	x	x	10	10	10	10	10	10	10	10	10	6	10	6		CC(C)C1CCC2C(C=1)=CCC1C2(C)CCCC1(C)C(=O)OCC(CO)(CO)CO	C25H40O5	420.56	5.61	12	-6.39	0.401
68186-14-1	resin acids and rosin acids, me esters;resin acids and rosin acids, methyl esters;methyl rosinate;resin acids and rosin acids, me esters resin acids and rosin acids, methyl esters methyl rosinate	NO	NO	6	NO	NO	10	TRUE	10	1	High		FALSE	161	8	YES	YES	TRUE	TRUE	356	493		not classified	not applicable				x	6	6	6	10	6	10	6	6	3	6	3	6		CC(C)C1CCC2C(C=1)=CCC1C2(C)CCCC1(C)C(=O)OC	C21H32O2	316.46	6.75	7.804	-1.054	7.08
68259-05-2	benzoic acid, 3,3’-[(2,5-dimethyl-1,4-phenylene)bis[iminocarbonyl(2-hydroxy-3,1-naphthalenediyl)azo]]bis[4-methyl-, bis(2-chloroethyl) ester;bis(2-chloroethyl) 3,3'-[(2,5-dimethyl-p-phenylene)bis[iminocarbonyl(2-hydroxy-1,3-naphthylene)azo]]di-p-toluate;benzoic acid, 3,3'-[(2,5-dimethyl-1,4-phenylene)bis[iminocarbonyl(2-hydroxy-3,1-naphthalenediyl)azo]]bis[4-methyl-, bis(2-chloroethyl) ester;benz…	NO	NO	6	NO	NO	10	TRUE	10	1	High		FALSE	161	8	YES	YES	TRUE	TRUE	356	493		not classified	not applicable			x		6	6	3	3	3	3	6	6	1	10	1	10		Cc1ccc(C(=O)OCCCl)cc1N=Nc1c2ccccc2cc(C(=O)Nc2cc(C)c(NC(=O)c3cc4ccccc4c(N=Nc4cc(C(=O)OCCCl)ccc4C)c3O)cc2C)c1O	C50H42Cl2N6O8	925.77	12	12	0	1.7
68427-35-0	5-benzoxazolesulfonamide, 2-[7-(diethylamino)-2-oxo-2h-1-benzopyran-3-yl]-;2-[7-(diethylamino)-2-oxo-2h-1-benzopyran-3-yl]benzoxazole-5-sulphonamide;2-[7-(diethylamino)-2-oxo-2h-chromen-3-yl]-1,3-benzoxazole-5-sulfonamide;5-benzoxazolesulfonamide, 2- 7-(diethylamino)-2-oxo-2h-1-benzopyran-3-yl -;5-benzoxazolesulfonamide, 2-(7-(diethylamino)-2-oxo-2h-1-benzopyran-3-yl)-;5-benzoxazolesulfonamide, 2…	NO	NO	6	NO	YES	10	TRUE	10	1	High		FALSE	161	8	YES	YES	TRUE	TRUE	356	493		not classified	not applicable		x	x	x	10	10	10	10	10	10	10	10	10	10	10	10		CCN(CC)c1ccc2C=C(C3=Nc4cc(S(N)(=O)=O)ccc4O3)C(=O)Oc2c1	C20H19N3O5S	413.43	2.54	12	-9.46	0.0233
68512-65-2	resin acids and rosin acids, esters with ethylene glycol;ester of rosin with ethylene glycol, consisting of di- and mono-esters, as the reactor is charged with a 2:1 stoichiometric ratio of reactants (rosin and ethylene glycol), and reacted until the desired acid value is achieved, indicating that part of the -cooh groups of the parent rosin have been esterified.;resin acids and rosin acids, este…	NO	NO	6	NO	NO	10	TRUE	10	1	High		FALSE	161	8	YES	YES	TRUE	TRUE	356	493		not classified	not applicable		x	x	x	10	10	10	10	10	10	10	10	10	10	10	10		CC(C)C1CCC2C(C=1)=CCC1C2(C)CCCC1(C)C(=O)OCCOCCOCCOCCOCCO	C30H50O7	522.69	4.68	12	-7.32	0.374
68516-73-4	tetramethyl 2,2'-[1,4-phenylenebis[imino(1-acetyl-2-oxoethane-1,2-diyl)azo]]bisterephthalate;tetramethyl 2,2'-{benzene-1,4-diylbis[imino(1,3-dioxobutane-2,1-diyl)diazene-2,1-diyl]}dibenzene-1,4-dicarboxylate;1,4-benzenedicarboxylic acid, 2,2'-[1,4-phenylenebis[imino(1-acetyl-2-oxo-2,1-ethanediyl)azo]]bis-, tetramethyl ester;tetramethyl 2,2'-[1,4-phenylenebis[imino(1-acetyl-2-oxoethane-1,2-diyl)az…	NO	NO	6	NO	NO	10	TRUE	10	1	High		FALSE	161	8	YES	YES	TRUE	TRUE	356	493		not classified	not applicable		x	x	x	10	10	10	10	10	10	10	10	10	3	10	3		CC(=O)C(C(=O)N=Nc1cc(C(=O)OC)ccc1C(=O)OC)Nc1ccc(NC(C(C)=O)C(=O)N=Nc2cc(C(=O)OC)ccc2C(=O)OC)cc1	C34H32N6O12	716.62	1.84	12	-10.16	4.79e-05
68516-75-6	n,n'-naphthalene-1,5-diylbis[4-[(2,3-dichlorophenyl)azo]-3-hydroxynaphthalene-2-carboxamide];n,n'-naphthalene-1,5-diylbis{4-[(2,3-dichlorophenyl)diazenyl]-3-hydroxynaphthalene-2-carboxamide};2-naphthalenecarboxamide, n,n'-1,5-naphthalenediylbis[4-[(2,3-dichlorophenyl)azo]-3-hydroxy-;n,n'-naphthalene-1,5-diylbis{4-[(2,3-dichlorophenyl)diazenyl]-3-hydroxy-2-naphthamide};n,n'-naphthalene-1,5-diylbis…	NO	NO	6	NO	YES	10	TRUE	10	1	High		FALSE	161	8	YES	YES	TRUE	TRUE	356	493		not classified	not applicable		x	x		10	10	6	6	6	6	10	10	3	10	3	10		Oc1c(C(=O)Nc2cccc3c2cccc3NC(=O)c2cc3ccccc3c(N=Nc3cccc(Cl)c3Cl)c2O)cc2ccccc2c1N=Nc1cccc(Cl)c1Cl	C44H26Cl4N6O4	844.5	12	12	0	3380
68610-86-6	c.i. pigment yellow 127;butanamide, 2,2'-[(3,3'-dichloro[1,1'-biphenyl]-4,4'-diyl)bis(azo)]bis[3-oxo-, n,n'-bis(o-anisyl and 2,4-xylyl) derivatives;butanamide, 2,2'-[(3,3'-dichloro[1,1'-biphenyl]-4,4'-diyl)bis(azo)]bis[3-oxo-, n,n'-bis(o-anisyl and 2,4-xylyl) derivs.;2-[[2-chloro-4-[3-chloro-4-[[1-(2,4-dimethylphenylamino)-1,3-dioxobutan- 2-yl]diazenyl]phenyl]phenyl]diazenyl]-n-(2-methoxyphenyl)-…	NO	NO	6	NO	YES	10	TRUE	10	1	High		FALSE	161	8	YES	YES	TRUE	TRUE	356	493		not classified	not applicable		x	x	x	10	10	10	10	10	10	6	6	10	6	10	6		Cc1ccc(NC(=O)C(C(C)=O)N=Nc2ccc(-c3ccc(N=NC(C(C)=O)C(=O)Nc4ccccc4OC)c(Cl)c3)cc2Cl)c(C)c1	C35H32Cl2N6O5	687.55	7.1	12	-4.9	0.592
68648-53-3	resin acids and rosin acids, hydrogenated, esters with triethylene glycol	NO	NO	6	NO	NO	10	TRUE	10	1	High		FALSE	161	8	YES	YES	TRUE	TRUE	356	493		not classified	not applicable		x	x	x	10	10	10	10	10	10	10	10	10	10	10	10		CC(C)C1CCC2C(C1)CCC1C2(C)CCCC1(C)C(=O)OCCOCCOCCO	C26H46O5	438.62	5.4	12	-6.6	0.857
68890-66-4	2(1h)-pyridinone, 1-hydroxy-4-methyl-6-(2,4,4-trimethylpentyl)-, compd. with 2-aminoethanol (1:1)	NO	NO	6	NO	NO	10	TRUE	10	1	High		FALSE	161	8	YES	YES	TRUE	TRUE	356	493		not classified	not applicable		x	x	x	10	10	10	10	10	10	10	10	10	10	10	10		CC(CC1=CC(C)=CC(=O)N1O)CC(C)(C)C	C14H23NO2	237.33	3.71	11.49	-7.78	0.949
68909-18-2	pyridinium, 1-(phenylmethyl)-, et me derivs., chlorides	NO	NO	6	NO	NO	10	TRUE	10	1	High		FALSE	161	8	YES	YES	TRUE	TRUE	356	493		not classified	not applicable			x	x	6	6	10	10	10	10	10	10	10	10	10	10		CCc1ccn(Cl)(Cc2ccccc2)cc1C	C15H18ClN	247.75	-1.27	7.826	-9.096	0.0239
68957-94-8	1,3,5,2,4,6-trioxatriphosphorinane, 2,4,6-tripropyl-, 2,4,6-trioxide	NO	NO	6	NO	NO	10	TRUE	10	1	High		FALSE	161	8	YES	YES	TRUE	TRUE	356	493		not classified	not applicable			x	x	6	6	10	10	10	10	10	10	10	10	10	10		CCCP1(=O)OP(=O)(CCC)OP(=O)(CCC)O1	C9H21O6P3	318.17	0.49	8.269	-7.779	0.0475
70879-65-1	2-naphthalenol, 1-[[4-(phenylazo)phenyl]azo]-, ar’,ar’’-me derivs.;2-naphthalenol, 1-[[4-(phenylazo)phenyl]azo]-, ar',ar''-methyl derivatives;2-naphthalenol, 1-[[4-(phenylazo)phenyl]azo]-, ar',ar''-me derivs.;2-naphthalenol, 1-[[4-(phenylazo)phenyl]azo]-, ar',ar''-me derivs;2-naphthalenol, 1-[[4-(phenylazo)phenyl]azo]-, ar’,ar’’-me derivs. 2-naphthalenol, 1-[[4-(phenylazo)phenyl]azo]-, ar',ar''-m…	NO (Toxicity Score of 1 confirmed)	NO	6	NO	NO	10	TRUE	10	1	Low		FALSE	161	8	YES	YES	TRUE	TRUE	356	493		OTH-NO	CARC-MUTA		x	x	x	10	10	10	10	10	10	10	10	6	10	6	10		Cc1ccccc1N=Nc1ccc(N=Nc2c3ccccc3ccc2O)c(C)c1	C24H20N4O	380.43	8.72	12	-3.28	57.5
71216-01-8	urea, n,n’’-1,5-naphthalenediylbis[n’-[3-[(2-ethylhexyl)oxy]propyl]-;n,n''-naphthalene-1,5-diylbis[n'-[3-[(2-ethylhexyl)oxy]propyl]urea];n',n'''-naphthalene-1,5-diylbis(1-{3-[(2-ethylhexyl)oxy]propyl}urea);urea, n,n''-1,5-naphthalenediylbis[n'-[3-[(2-ethylhexyl)oxy]propyl]-;urea, n,n''-1,5-naphthalenediylbis n'- 3- (2-ethylhexyl)oxy propyl -;urea, n,n''-1,5-naphthalenediylbisХn'-Х3-Х(2-ethylhexyl…	NO	NO	6	NO	NO	10	TRUE	10	1	High		FALSE	161	8	YES	YES	TRUE	TRUE	356	493		not classified	not applicable		x			10	6	6	6	6	6	6	6	6	6	6	6		CCCCC(CC)COCCCNC(=O)Nc1cccc2c1cccc2NC(=O)NCCCOCC(CC)CCCC	C34H56N4O4	584.81	8.69	12	-3.31	0.101
71566-54-6	benzoic acid, 3,3’-[(2,5-dichloro-1,4-phenylene)bis[iminocarbonyl(2-hydroxy-3,1-naphthalenediyl)azo]]bis[4-methyl-, bis(1-methylethyl) ester;diisopropyl 3,3'-[(2,5-dichloro-1,4-phenylene)bis[iminocarbonyl(2-hydroxy-3,1-naphthylene)azo]]bis[4-methylbenzoate];dipropan-2-yl 3,3'-{(2,5-dichlorobenzene-1,4-diyl)bis[carbamoyl(2-hydroxynaphthalene-3,1-diyl)(e)diazene-2,1-diyl]}bis(4-methylbenzoate);benz…	NO	NO	6	NO	NO	10	TRUE	10	1	High		FALSE	161	8	YES	YES	TRUE	TRUE	356	493		not classified	not applicable			x		6	6	3	3	3	3	10	10	1	10	3	10		CC(C)OC(=O)c1ccc(C)c(N=Nc2c3ccccc3cc(C(=O)Nc3cc(Cl)c(NC(=O)c4cc5ccccc5c(N=Nc5cc(C(=O)OC(C)C)ccc5C)c4O)cc3Cl)c2O)c1	C50H42Cl2N6O8	925.77	12	12	0	5.55
72102-84-2	2,4,6(1h,3h,5h)-pyrimidinetrione, 5-[(2,3-dihydro-6-methyl-2-oxo-1h-benzimidazol-5-yl)azo]-;5-[(2,3-dihydro-6-methyl-2-oxo-1h-benzimidazol-5-yl)azo]barbituric acid;5-[(6-methyl-2-oxo-2,3-dihydro-1h-benzimidazol-5-yl)diazenyl]pyrimidine-2,4,6(1h,3h,5h)-trione;2,4,6(1h,3h,5h)-pyrimidinetrione, 5-[(2,3-dihydro-6-methyl-2-oxo-1h-benzimidazol-5-yl)azo]- 5-[(2,3-dihydro-6-methyl-2-oxo-1h-benzimidazol-5…	NO	NO	6	NO	NO	10	TRUE	10	1	High		FALSE	161	8	YES	YES	TRUE	TRUE	356	493		not classified	not applicable		x	x	x	10	10	10	10	10	10	10	10	10	6	10	10		Cc1cc2c(cc1N=NC1C(=O)NC(=O)NC1=O)N=C(O)N2	C12H10N6O4	302.24	0.8	12	-11.2	0.000184
72676-55-2	1,3,4-thiadiazole-2(3h)-thione, 5,5’-dithiobis-;5,5'-dithiodi-1,3,4-thiadiazole-2(3h)-thione;1,3,4-thiadiazole-2(3h)-thione, 5,5'-dithiobis-	NO	NO	6	NO	NO	10	TRUE	10	1	High		FALSE	161	8	YES	YES	TRUE	TRUE	356	493		not classified	not applicable		x	x	x	6	10	10	10	10	10	10	10	10	6	10	10		S=C1NN=C(SSC2=NNC(=S)S2)S1	C4H2N4S6	298.47	0.93	9.301	-8.371	0.00962
73398-89-7	xanthylium, 3,6-bis(diethylamino)-9-[2-(methoxycarbonyl)phenyl]-, (t-4)-tetrachlorozincate(2-) (2:1)	NO	NO	6	NO	YES	10	TRUE	10	1	High		FALSE	161	8	YES	YES	TRUE	TRUE	356	493		not classified	not applicable		x		x	10	10	10	10	6	10	6	6	6	6	6	6		CCN(CC)c1ccc2C(c3ccccc3C(=O)OC)c3ccc(N(CC)CC)cc3Oc2c1	C29H34N2O3	458.57	7.81	12	-4.19	0.257
7381-13-7	2h-azepin-2-one, 1,1'-(1,3-phenylenedicarbonyl)bis[hexahydro-;2h-azepin-2-one, 1,1'-(1,3-phenylenedicarbonyl)bis hexahydro-;2h-azepin-2-one, 1,1'-isophthaloylbisХhexahydro-;2h-azepin-2-one, 1,1'-(1,3-phenylenedicarbonyl)bisХhexahydro-;1,1'-(1,3-phenylenedicarbonyl)diazepan-2-one;1,1'-isophthaloylbiscaprolactam;2h-azepin-2-one, 1,1'-(1,3-phenylenedicarbonyl)bis[hexahydro- 2h-azepin-2-one, 1,1'-(1,…	NO	NO	6	NO	NO	10	TRUE	10	1	High		FALSE	161	8	YES	YES	TRUE	TRUE	356	493		not classified	not applicable		x	x	x	10	10	10	10	10	10	10	10	10	10	10	10		O=C1CCCCCN1C(=O)c1cccc(C(=O)N2CCCCCC2=O)c1	C20H24N2O4	356.4	2.51	12	-9.49	0.834
74336-59-7	pyrazolo[5,1-b]quinazolin-9(1h)-one, 3-[(4-chloro-2-nitrophenyl)azo]-2-methyl-;3-[(4-chloro-2-nitrophenyl)azo]-2-methylpyrazolo[5,1-b]quinazolin-9(1h)-one;3-[(4-chloro-2-nitrophenyl)diazenyl]-2-methylpyrazolo[5,1-b]quinazolin-9(1h)-one;pyrazolo(5,1-b)quinazolin-9(1h)-one, 3-((4-chloro-2-nitrophenyl)azo)-2-methyl-;pyrazolo[5,1-b]quinazolin-9(1h)-one, 3-[(4-chloro-2-nitrophenyl)azo]-2-methyl- 3-[(4…	NO	NO	6	NO	NO	10	TRUE	10	1	High		FALSE	161	8	YES	YES	TRUE	TRUE	356	493		not classified	not applicable		x	x	x	10	10	10	10	10	10	10	10	10	10	10	10		CC1=C(N=Nc2ccc(Cl)cc2N(=O)=O)C2=Nc3ccccc3C(=O)N2N1	C17H11ClN6O3	382.75	4.08	12	-7.92	6.98
76199-85-4	acetamide, 2-cyano-2-[2,3-dihydro-3-(tetrahydro-2,4,6-trioxo-5(2h)-pyrimidinylidene)-1h-isoindol-1-ylidene]-n-methyl-;2-cyano-2-[2,3-dihydro-3-(tetrahydro-2,4,6-trioxo-5(2h)-pyrimidinylidene)-1h-isoindol-1-ylidene]-n-methylacetamide;2-cyano-n-methyl-2-[3-(2,4,6-trioxotetrahydropyrimidin-5(2h)-ylidene)-2,3-dihydro-1h-isoindol-1-ylidene]acetamide;acetamide, 2-cyano-2-(2,3-dihydro-3-(tetrahydro-2,4,…	NO	NO	6	NO	NO	10	TRUE	10	1	High		FALSE	161	8	YES	YES	TRUE	TRUE	356	493		not classified	not applicable		x	x	x	10	10	10	10	10	10	10	10	10	10	10	10		CNC(=O)C(C#N)=C1c2ccccc2C(=C2C(=O)NC(=O)NC2=O)N1	C16H11N5O4	337.28	-1.1	12	-13.1	0.00224
77804-81-0	2,2'-[ethylenebis(oxyphenyl-2,1-eneazo)]bis[n-(2,3-dihydro-2-oxo-1h-benzimidazol-5-yl)-3-oxobutyramide;2,2'-{ethane-1,2-diylbis[oxybenzene-2,1-diyl(e)diazene-2,1-diyl]}bis[3-oxo-n-(2-oxo-2,3-dihydro-1h-benzimidazol-5-yl)butanamide];butanamide, 2,2'-[1,2-ethanediylbis(oxy-2,1-phenyleneazo)]bis[n-(2,3-dihydro-2-oxo-1h-benzimidazol-5-yl)-3-oxo-;2,2'-[ethylenebis(oxyphenyl-2,1-eneazo)]bis[n-(2,3-dihy…	NO	NO	6	NO	NO	10	TRUE	10	1	High		FALSE	161	8	YES	YES	TRUE	TRUE	356	493		not classified	not applicable			x		6	6	6	6	6	6	6	6	10	3	10	3		CC(=O)C(C(=O)Nc1ccc2c(c1)N=C(O)N2)N=Nc1ccccc1OCCOc1ccccc1N=NC(C(C)=O)C(=O)Nc1ccc2c(c1)N=C(O)N2	C36H32N10O8	732.67	4.84	12	-7.16	0.00204
7786-17-6	phenol, 2,2’-methylenebis[4-methyl-6-nonyl-;2,2'-methylenebis(6-nonyl-p-cresol);phenol, 2,2'-methylenebis[4-methyl-6-nonyl-;2,2'-methanediylbis(4-methyl-6-nonylphenol);phenol, 2,2'-methylenebis 4-methyl-6-nonyl-;2,2'-methylenebis(4-methyl-6-nonylphenol);phenol, 2,2'-methylenebis(4-methyl-6-nonyl-;phenol, 2,2’-methylenebis[4-methyl-6-nonyl- 2,2'-methylenebis(6-nonyl-p-cresol) phenol, 2,2'-methylen…	NO	NO	6	NO	NO	10	TRUE	10	1	High		FALSE	161	8	YES	YES	TRUE	TRUE	356	493		not classified	not applicable			x		6	6	3	3	3	3	10	10	1	10	3	10		CCCCCCCCCc1cc(C)cc(Cc2cc(C)cc(CCCCCCCCC)c2O)c1O	C33H52O2	480.74	12	12	0	13.3
787582-75-6	2h-pyran, 2-[4'-[difluoro(3,4,5-trifluorophenoxy)methyl]-3',5'-difluoro[1,1'-biphenyl]-4-yl]-5-ethyltetrahydro-;[name not available];2h-pyran, 2-[4'-[difluoro(3,4,5-trifluorophenoxy)methyl]-3',5'-difluoro[1,1'-biphenyl]-4-yl]-5-ethyltetrahydro- [name not available]	NO	NO	6	NO	YES	10	TRUE	10	1	High		FALSE	161	8	YES	YES	TRUE	TRUE	356	493		not classified	not applicable		x	x	x	10	10	10	10	10	10	10	10	6	10	6	10		CCC1CCC(c2ccc(-c3cc(F)c(C(F)(F)Oc4cc(F)c(F)c(F)c4)c(F)c3)cc2)OC1	C26H21F7O2	498.41	9.55	12	-2.45	121
79665-24-0	n,n'-(2,5-dimethyl-1,4-phenylene)bis[4-[(5-chloro-2-methylphenyl)azo]-3-hydroxynaphthalene-2-carboxamide;2-naphthalenecarboxamide, n,n'-(2,5-dimethyl-1,4-phenylene)bis[4-[(5-chloro-2-methylphenyl)azo]-3-hydroxy-;2-naphthalenecarboxamide, n,n'-(2,5-dimethyl-1,4-phenylene)bis[4-[2-(5-chloro-2-methylphenyl)diazenyl]-3-hydroxy-;n,n'-(2,5-dimethyl-1,4-phenylene)bis[4-[(5-chloro-2-methylphenyl)azo]-3-h…	NO	NO	6	NO	YES	10	TRUE	10	1	High		FALSE	161	8	YES	YES	TRUE	TRUE	356	493		not classified	not applicable			x		6	6	6	6	6	6	10	10	3	10	3	10		Cc1ccc(Cl)cc1N=Nc1c2ccccc2cc(C(=O)Nc2cc(C)c(NC(=O)c3cc4ccccc4c(N=Nc4cc(Cl)ccc4C)c3O)cc2C)c1O	C44H34Cl2N6O4	781.65	12	12	0	125
79953-85-8	3,3'-[(2-chloro-5-methyl-p-phenylene)bis[imino(1-acetyl-2-oxoethylene)azo]]bis[4-chloro-n-[2-(4-chlorophenoxy)-5-(trifluoromethyl)phenyl]benzamide];3,3'-{(2-chloro-5-methylbenzene-1,4-diyl)bis[imino(1,3-dioxobutane-2,1-diyl)diazene-2,1-diyl]}bis{4-chloro-n-[2-(4-chlorophenoxy)-5-(trifluoromethyl)phenyl]benzamide};benzamide, 3,3'-[(2-chloro-5-methyl-1,4-phenylene)bis[imino(1-acetyl-2-oxo-2,1-ethan…	NO	NO	6	NO	NO	10	TRUE	10	1	High		FALSE	161	8	YES	YES	TRUE	TRUE	356	493		not classified	not applicable		x	x		10	10	6	6	6	6	10	10	3	10	6	10		Cc1cc(NC(C(C)=O)C(=O)N=Nc2cc(C(=O)Nc3cc(C(F)(F)F)ccc3Oc3ccc(Cl)cc3)ccc2Cl)c(Cl)cc1NC(C(C)=O)C(=O)N=Nc1cc(C(=O)Nc2cc(C(F)(F)F)ccc2Oc2ccc(Cl)cc2)ccc1Cl	C55H37Cl5F6N8O8	1229.1	10.92	12	-1.08	429
8007-24-7	cashew nut shell liquid;cashew, nutshell liq.;cashew, nutshell liquid;cashew nut oil;cashew nut shell liquid cashew, nutshell liq. cashew, nutshell liquid cashew nut oil	NO	NO	6	NO	NO	10	TRUE	10	1	High		FALSE	161	8	YES	YES	TRUE	TRUE	356	493		not classified	not applicable		x	x	x	10	10	10	10	10	10	10	10	6	10	6	10		C=CCC=CCC=CCCCCCCCc1cccc(O)c1	C21H30O	298.45	8.37	11.484	-3.114	14.5
8050-15-5	resin acids and rosin acids, hydrogenated, me esters;resin acids and rosin acids, hydrogenated, methyl esters;methyl hydrogenated rosinate;resin acids and rosin acids, hydrogenated, me esters resin acids and rosin acids, hydrogenated, methyl esters methyl hydrogenated rosinate	NO	NO	6	NO	NO	10	TRUE	10	1	High		FALSE	161	8	YES	YES	TRUE	TRUE	356	493		not classified	not applicable				x	6	6	6	10	6	10	6	6	3	6	3	6		CC(C)C1CCC2C(C1)CCC1C2(C)CCCC1(C)C(=O)OC	C21H36O2	320.49	6.92	7.918	-0.998	8.17
80675-49-6	butanamide, 2-[2-(2-methoxy-5-nitrophenyl)diazenyl]-n-(2-methoxyphenyl)-3-oxo-;2-[(2-methoxy-5-nitrophenyl)diazenyl]-n-(2-methoxyphenyl)-3-oxobutanamide;butanamide, 2-[2-(2-methoxy-5-nitrophenyl)diazenyl]-n-(2-methoxyphenyl)-3-oxo- 2-[(2-methoxy-5-nitrophenyl)diazenyl]-n-(2-methoxyphenyl)-3-oxobutanamide	NO	NO	6	NO	NO	10	TRUE	10	1	High		FALSE	161	8	YES	YES	TRUE	TRUE	356	493		not classified	not applicable		x	x	x	10	10	10	10	10	10	10	10	10	10	10	10		CC(=O)C(C(=O)Nc1ccccc1OC)N=Nc1cc(N(=O)=O)ccc1OC	C18H18N4O6	386.34	2.99	12	-9.01	0.102
81-33-4	anthra[2,1,9-def:6,5,10-d’e’f’]diisoquinoline-1,3,8,10(2h,9h)-tetrone;perylene-3,4:9,10-tetracarboxydiimide;anthra[2,1,9-def:6,5,10-d'e'f']diisoquinoline-1,3,8,10(2h,9h)-tetrone;isoquino[4',5',6':6,5,10]anthra[2,1,9-def]isoquinoline-1,3,8,10(2h,9h)-tetrone;anthra 2,1,9-def:6,5,10-d'e'f' diisoquinoline-1,3,8,10(2h,9h)-tetrone;3,4,9,10-perylenetetracarboxylic 3,4:9,10-diimide;anthraХ2,1,9-def:6,5,1…	NO	NO	6	NO	NO	10	TRUE	10	1	High		FALSE	161	8	YES	YES	TRUE	TRUE	356	493		not classified	not applicable		x	x	x	10	10	10	10	10	10	10	10	10	10	10	10		O=C1c2ccc3c4ccc5c6c4c(ccc6C(=O)NC5=O)c4ccc(c2c34)C(=O)N1	C24H10N2O4	390.33	3.76	12	-8.24	0.127
81-39-0	3h-dibenz[f,ij]isoquinoline-2,7-dione, 3-methyl-6-[(4-methylphenyl)amino]-;3-methyl-6-(p-toluidino)-3h-dibenz[f,ij]isoquinoline-2,7-dione;3-methyl-6-[(4-methylphenyl)amino]-3h-naphtho[1,2,3-de]quinoline-2,7-dione;3h-naphtho[1,2,3-de]quinoline-2,7-dione, 3-methyl-6-[(4-methylphenyl)amino]-;3h-dibenz f,ij isoquinoline-2,7-dione, 3-methyl-6- (4-methylphenyl)amino -;3h-dibenzХf,ijеisoquinoline-2,7-di…	NO	NO	6	NO	NO	10	TRUE	10	1	High		FALSE	161	8	YES	YES	TRUE	TRUE	356	493		not classified	not applicable		x	x	x	10	10	10	10	10	10	10	10	10	10	10	10		Cc1ccc(Nc2ccc3c4c2C(=O)c2ccccc2C4=CC(=O)N3C)cc1	C24H18N2O2	366.39	4.51	12	-7.49	0.312
82-16-6	9,10-anthracenedione, 1,8-bis[(4-methylphenyl)amino]-;1,8-bis[(4-methylphenyl)amino]anthraquinone;1,8-bis[(4-methylphenyl)amino]anthracene-9,10-dione;9,10-anthracenedione, 1,8-bis (4-methylphenyl)amino -;anthraquinone, 1,8-di-p-toluidino-;9,10-anthracenedione, 1,8-bisХ(4-methylphenyl)aminoе-;9,10-anthracenedione, 1,8-bis[(4-methylphenyl)amino]- 1,8-bis[(4-methylphenyl)amino]anthraquinone 1,8-bis[…	NO	NO	6	NO	NO	10	TRUE	10	1	High		FALSE	161	8	YES	YES	TRUE	TRUE	356	493		not classified	not applicable		x	x	x	10	10	10	10	10	10	10	10	6	10	6	10		Cc1ccc(Nc2cccc3c2C(=O)c2c(Nc4ccc(C)cc4)cccc2C3=O)cc1	C28H22N2O2	418.47	9.24	12	-2.76	15.5
82199-12-0	n-(2,3-dihydro-2-oxo-1h-benzimidazol-5-yl)-2-[(2-methoxyphenyl)azo]-3-oxobutyramide;2-[(2-methoxyphenyl)diazenyl]-3-oxo-n-(2-oxo-2,3-dihydro-1h-benzimidazol-5-yl)butanamide;butanamide, n-(2,3-dihydro-2-oxo-1h-benzimidazol-5-yl)-2-[(2-methoxyphenyl)azo]-3-oxo-;n-(2,3-dihydro-2-oxo-1h-benzimidazol-5-yl)-2-[(2-methoxyphenyl)azo]-3-oxobutyramide 2-[(2-methoxyphenyl)diazenyl]-3-oxo-n-(2-oxo-2,3-dihydr…	NO	NO	6	NO	YES	10	TRUE	10	1	High		FALSE	161	8	YES	YES	TRUE	TRUE	356	493		not classified	not applicable		x	x	x	10	10	10	10	10	10	10	10	10	10	10	10		CC(=O)C(C(=O)Nc1ccc2c(c1)N=C(O)N2)N=Nc1ccccc1OC	C18H17N5O4	367.35	2.59	12	-9.41	0.0144
82203-23-4	d-glucitol, 1,3:2,4-bis-o-[(4-chlorophenyl)methylene]-;(1r)-1-[(4r,4ar,8as)-2,6-bis(4-chlorophenyl)tetrahydro[1,3]dioxino[5,4-d][1,3]dioxin-4-yl]ethane-1,2-diol;d-glucitol, 1,3:2,4-bis-o-[(4-chlorophenyl)methylene]- (1r)-1-[(4r,4ar,8as)-2,6-bis(4-chlorophenyl)tetrahydro[1,3]dioxino[5,4-d][1,3]dioxin-4-yl]ethane-1,2-diol	NO	NO	6	NO	NO	10	TRUE	10	1	High		FALSE	161	8	YES	YES	TRUE	TRUE	356	493		not classified	not applicable		x	x	x	10	10	10	10	10	10	10	10	10	10	10	10		OCC(O)C1C2C(COC(c3ccc(Cl)cc3)O2)OC(c2ccc(Cl)cc2)O1	C20H20Cl2O6	427.26	2.67	12	-9.33	0.549
83524-75-8	anthra[2,1,9-def:6,5,10-d’e’f’]diisoquinoline-1,3,8,10(2h,9h)-tetrone, 2,9-bis[(4-methoxyphenyl)methyl]-;2,9-bis(p-methoxybenzyl)anthra[2,1,9-def:6,5,10-d'e'f']diisoquinoline-1,3,8,10(2h,9h)-tetrone;2,9-bis(4-methoxybenzyl)isoquino[4',5',6':6,5,10]anthra[2,1,9-def]isoquinoline-1,3,8,10(2h,9h)-tetrone;anthra[2,1,9-def:6,5,10-d'e'f']diisoquinoline-1,3,8,10(2h,9h)-tetrone, 2,9-bis[(4-methoxyphenyl)m…	NO	NO	6	NO	NO	10	TRUE	10	1	High		FALSE	161	8	YES	YES	TRUE	TRUE	356	493		not classified	not applicable		x	x	x	10	10	10	10	10	10	10	10	10	10	10	10		COc1ccc(CN2C(=O)c3ccc4c5ccc6c7c5c(ccc7C(=O)N(Cc5ccc(OC)cc5)C6=O)c5ccc(C2=O)c3c45)cc1	C40H26N2O6	630.61	7.76	12	-4.24	4.67
83-73-8	5,7-diiodo-quinolin-8-ol;8-quinolinol, 5,7-diiodo-;diiodohydroxyquinoline;iodoquinol;5,7-diiodoquinolin-8-ol;5,7-diiodo-quinolin-8-ol 8-quinolinol, 5,7-diiodo- diiodohydroxyquinoline iodoquinol 5,7-diiodoquinolin-8-ol	NO	NO	6	NO	NO	10	TRUE	10	1	High		FALSE	161	8	YES	YES	TRUE	TRUE	356	493		not classified	not applicable		x	x	x	10	10	10	10	10	10	10	10	10	6	10	6		Oc1c(I)cc(I)c2cccnc12	C9H5I2NO	396.94	4	12	-8	0.0345
83846-85-9	4-(4-methylphenylthio)benzophenone;{4-[(4-methylphenyl)sulfanyl]phenyl}(phenyl)methanone;methanone, [4-[(4-methylphenyl)thio]phenyl]phenyl-	NO	NO	6	NO	NO	10	TRUE	10	1	High		FALSE	161	8	YES	YES	TRUE	TRUE	356	493		not classified	not applicable		x	x	x	10	10	10	10	10	10	10	10	10	10	10	10		Cc1ccc(Sc2ccc(C(=O)c3ccccc3)cc2)cc1	C20H16OS	304.39	5.99	12	-6.01	10.3
83968-28-9	formaldehyde, reaction products with n,n-dimethylbenzenamine and n-methylbenzenamine, oxidized, hydrochlorides	NO	NO	6	NO	NO	10	TRUE	10	1	High		FALSE	161	8	YES	YES	TRUE	TRUE	356	493		not classified	not applicable		x	x	x	10	10	10	10	10	10	10	10	10	10	10	10		Cc1cc(C=C2C=CC(=N(C)(C)Cl)C=C2)ccc1N(C)C	C18H23ClN2	302.83	0.39	11.102	-10.712	0.091
847565-09-7	(1r,2s,5r)-5-methyl-2-(propan-2-yl)-n-[2-(pyridin-2-yl)ethyl]cyclohexanecarboxamide	NO	NO	6	NO	NO	10	TRUE	10	1	High		FALSE	161	8	YES	YES	TRUE	TRUE	356	493		not classified	not applicable		x	x	x	10	10	10	10	10	10	10	10	10	10	10	10		CC(C)C1CCC(C)CC1C(=O)NCCc1ccccn1	C18H28N2O	288.41	4.33	12	-7.67	0.228
85-41-6	1h-isoindole-1,3(2h)-dione;phthalimide;isoindole-1,3-dione;phthalimi;phthalimide (1h-isoindole-1,3(2h)-dione);1h-isoindole-1,3(2h)-dione phthalimide isoindole-1,3-dione phthalimi phthalimide (1h-isoindole-1,3(2h)-dione)	NO	NO	6	NO	NO	10	TRUE	10	1	High		FALSE	161	8	YES	YES	TRUE	TRUE	356	493		not classified	not applicable			x	x	6	6	10	10	10	10	6	6	10	10	10	10		O=C1c2ccccc2C(=O)N1	C8H5NO2	147.12	1.15	7.53	-6.38	0.375
85-60-9	4,4'-butylidenebis(3-methyl-6-tert-butylphenol);4,4'-butylidene bis(6-tert-butyl-m-creosol);phenol, 4,4’-butylidenebis[2-(1,1-dimethylethyl)-5-methyl-;6,6'-di-tert-butyl-4,4'-butylidenedi-m-cresol;phenol, 4,4'-butylidenebis[2-(1,1-dimethylethyl)-5-methyl-;4,4'-butane-1,1-diylbis(2-tert-butyl-5-methylphenol);phenol, 4,4'-butylidenebis 2-(1,1-dimethylethyl)-5-methyl-;m-cresol, 4,4'-butylidenebisХ6-…	NO (Toxicity Score of 1 confirmed)	NO	6	NO	NO	10	TRUE	10	1	Low		FALSE	161	8	YES	YES	TRUE	TRUE	356	493		OTH-NO	STOT RE		x	x		10	10	6	6	6	6	6	6	6	10	6	10		CCCC(c1cc(C(C)(C)C)c(O)cc1C)c1cc(C(C)(C)C)c(O)cc1C	C26H38O2	382.56	9.09	12	-2.91	4.01
85-91-6	n-methylanthranilic acid, methyl ester;2-methoxycarbonyl-n-methylaniline;methyl-n-methylanthranilate;benzoic acid, 2-(methylamino)-, methyl ester;methyl n-methylanthranilate;methyl 2-(methylamino)benzoate;anthranilic acid, n-methyl-, methyl ester;2-(methylamino)benzoic acid methyl ester	NO	NO	6	NO	NO	10	TRUE	10	1	High		FALSE	161	8	YES	YES	TRUE	TRUE	356	493		not classified	not applicable			x		6	6	6	6	6	6	6	6	10	6	6	6		CNc1ccccc1C(=O)OC	C9H11NO2	165.18	2.81	8.769	-5.959	0.096
87061-04-9	1,2-propanediol, 3-[[5-methyl-2-(1-methylethyl)cyclohexyl]oxy]-;3-[[5-methyl-2-(1-methylethyl)cyclohexyl]oxy]propane-1,2-diol;3-{[5-methyl-2-(propan-2-yl)cyclohexyl]oxy}propane-1,2-diol;3-(5-methyl-2-propan-2-ylcyclohexyl)oxypropane-1,2-diol;1,2-propanediol, 3-[[5-methyl-2-(1-methylethyl)cyclohexyl]oxy]- 3-[[5-methyl-2-(1-methylethyl)cyclohexyl]oxy]propane-1,2-diol 3-{[5-methyl-2-(propan-2-yl)cyc…	NO	NO	6	NO	NO	10	TRUE	10	1	High		FALSE	161	8	YES	YES	TRUE	TRUE	356	493		not classified	not applicable			x	x	6	6	10	10	6	10	6	6	10	6	10	6		CC(C)C1CCC(C)CC1OCC(O)CO	C13H26O3	230.33	2.87	9.198	-6.328	0.216
88122-99-0	benzoic acid, 4,4',4''-(1,3,5-triazine-2,4,6-triyltriimino)tris-, 1,1',1''-tris(2-ethylhexyl) ester;benzoic acid, 4,4',4''-(1,3,5-triazine-2,4,6-triyltriimino)tris-, tris(2-ethylhexyl) ester;tris(2-ethylhexyl)-4,4',4''-(1,3,5-triazine-2,4,6-triyltriimino)tribenzoate;tris(2-ethylhexyl) 4,4',4''-(1,3,5-triazine-2,4,6-triyltriimino)tribenzoate;octyltriazone;benzoic acid, 4,4',4''-(1,3,5-triazine-2,4…	NO	NO	6	NO	NO	10	TRUE	10	1	High		FALSE	161	8	YES	YES	TRUE	TRUE	356	493		not classified	not applicable			x		6	6	6	6	6	6	10	10	3	10	3	10		CCCCC(CC)COC(=O)c1ccc(Nc2nc(Nc3ccc(C(=O)OCC(CC)CCCC)cc3)nc(Nc3ccc(C(=O)OCC(CC)CCCC)cc3)n2)cc1	C48H66N6O6	823.04	12	12	0	50.9
89392-03-0	carbamic acid, n-(4,6-dimethoxy-2-pyrimidinyl)-, phenyl ester;phenyl n-(4,6-dimethoxypyrimidin-2-yl)carbamate;4,6-dimethoxy-2-((phenoxycarbonyl)amino)pyrimidine;(4,6-dimethoxy-2-pyrimidinyl)carbamidsaeurephenylester;carbamic acid, n-(4,6-dimethoxy-2-pyrimidinyl)-, phenyl ester phenyl n-(4,6-dimethoxypyrimidin-2-yl)carbamate 4,6-dimethoxy-2-((phenoxycarbonyl)amino)pyrimidine (4,6-dimethoxy-2-pyrim…	NO	NO	6	NO	YES	10	TRUE	10	1	High		FALSE	161	8	YES	YES	TRUE	TRUE	356	493		not classified	not applicable		x	x	x	6	10	6	10	6	10	6	6	10	6	10	6		COc1cc(OC)nc(NC(=O)Oc2ccccc2)n1	C13H13N3O4	275.25	2.84	9.573	-6.733	0.0593
9014-85-1	poly(oxy-1,2-ethanediyl), ?,?’-[1,4-dimethyl-1,4-bis(2-methylpropyl)-2-butyne-1,4-diyl]bis[?-hydroxy-;poly(oxy-1,2-ethanediyl), .alpha.,.alpha.'-[1,4-dimethyl-1,4-bis(2-methylpropyl)-2-butyne-1,4-diyl]bis[.omega.-hydroxy-;2,4,7,9-tetramethyldec-5-yne-4,7-diol, ethoxylated;2,4,7,9-tetramethyl-5-decyne-4,7-diol, ethoxylated;surfynol 440;surfynol 400er;ethoxylated tmdd;poly(oxy-1,2-ethanediyl), ?,?’…	NO	NO	6	NO	NO	10	TRUE	10	1	High		FALSE	161	8	YES	YES	TRUE	TRUE	356	493		not classified	not applicable		x	x	x	10	10	10	10	10	10	6	6	10	6	10	10		CC(C)CC(C)(C#CC(C)(O)CC(C)C)OCCO	C16H30O3	270.39	3.33	10.139	-6.809	0.198
90268-23-8	c.i. pigment yellow 126;butanamide, 2,2'-[(3,3'-dichloro[1,1'-biphenyl]-4,4'-diyl)bis(azo)]bis[3-oxo-, n,n'-bis(p-anisyl and phenyl) derivatives;butanamide, 2,2'-[(3,3'-dichloro[1,1'-biphenyl]-4,4'-diyl)bis(azo)]bis[3-oxo-, n,n'-bis(p-anisyl and ph) derivs.;2-[[2-chloro-4-[3-chloro-4-[[1-(2-methylanilino)-1,3-dioxobutan-2-yl]diazenyl]phenyl]phenyl]diazenyl]-n-(phenyl)-3-oxobutanamide;c.i. pigment…	NO	NO	6	NO	YES	10	TRUE	10	1	High		FALSE	161	8	YES	YES	TRUE	TRUE	356	493		not classified	not applicable		x	x	x	10	10	10	10	10	10	6	6	10	6	10	6		CC(=O)C(C(=O)Nc1ccccc1)N=Nc1ccc(-c2ccc(N=NC(C(C)=O)C(=O)Nc3ccc(OC)cc3)c(Cl)c2)cc1Cl	C33H28Cl2N6O5	659.49	7.13	12	-4.87	0.4
90268-24-9	c.i. pigment yellow 176;butanamide, 2,2'-[(3,3'-dichloro[1,1'-biphenyl]-4,4'-diyl)bis(azo)]bis[3-oxo-, n,n'-bis(4-chloro-2,5-dimethoxyphenyl and 2,4-xylyl) derivatives;butanamide, 2,2'-[(3,3'-dichloro[1,1'-biphenyl]-4,4'-diyl)bis(azo)]bis[3-oxo-, n,n'-bis(4-chloro-2,5-dimethoxyphenyl and 2,4-xylyl) derivs.;2,2'-[(3,3'-dichloro[1,1'-biphenyl]-4,4'-diyl)bis(azo)]bis[3-oxo-, n,n'-bis(4- chloro-2,5-d…	NO	NO	6	NO	YES	10	TRUE	10	1	High		FALSE	161	8	YES	YES	TRUE	TRUE	356	493		not classified	not applicable		x	x	x	10	10	10	10	10	10	10	10	10	10	10	10		Cc1ccc(NC(=O)C(C(C)=O)N=Nc2ccc(-c3ccc(N=NC(C(C)=O)C(=O)Nc4cc(OC)c(Cl)cc4OC)c(Cl)c3)cc2Cl)c(C)c1	C36H33Cl3N6O6	752.02	7.83	12	-4.17	4.3
916809-14-8	phosphorothioic triamide, n-propyl-;n-propylphosphorothioic triamide;phosphorothioic triamide, n-propyl- n-propylphosphorothioic triamide	NO	NO	6	NO	YES	10	TRUE	10	1	High		FALSE	161	8	YES	YES	TRUE	TRUE	356	493		not classified	not applicable			x	x	6	6	10	10	10	10	6	6	10	6	10	10		CCCNP(N)(N)=S	C3H12N3PS	153.18	-0.81	7.522	-8.332	0.013
92952-81-3	phenol, 4-[(3-hydroxypropyl)amino]-3-nitro-;4-[(3-hydroxypropyl)amino]-3-nitrophenol;1-hydroxy-3-nitro-4-(3-hydroxypropylamino)benzene;phenol, 4-[(3-hydroxypropyl)amino]-3-nitro- 4-[(3-hydroxypropyl)amino]-3-nitrophenol 1-hydroxy-3-nitro-4-(3-hydroxypropylamino)benzene	NO	NO	6	NO	NO	10	TRUE	10	1	High		FALSE	161	8	YES	YES	TRUE	TRUE	356	493		not classified	not applicable		x	x	x	10	10	10	10	10	10	10	10	10	10	10	10		OCCCNc1ccc(O)cc1N(=O)=O	C9H12N2O4	212.19	0.7	12	-11.3	0.00542
94-18-8	benzylparaben;benzyl 4-hydroxybenzoate;benzyl-4-aminobenzoate;benzyl-4-hydroxybenzoate;benzoic acid, 4-hydroxy-, phenylmethyl ester	NO	NO	6	NO	NO	10	TRUE	10	1	High		FALSE	161	8	YES	YES	TRUE	TRUE	356	493		not classified	not applicable		x	x	x	10	10	10	10	10	10	6	6	10	6	10	6		Oc1ccc(C(=O)OCc2ccccc2)cc1	C14H12O3	228.23	3.56	11.483	-7.923	0.0219
947701-81-7	10-undecenyl 2-cyano-3,3-diphenylpropenoate;undecenyl crylene;uc;10-undecenyl 2-cyano-3,3-diphenylpropenoate undecenyl crylene uc	NO	NO	6	NO	YES	10	TRUE	10	1	High		FALSE	161	8	YES	YES	TRUE	TRUE	356	493		not classified	not applicable		x	x	x	10	10	10	10	10	10	6	6	6	10	6	10		C=CCCCCCCCCCOC(=O)C(C#N)=C(c1ccccc1)c1ccccc1	C27H31NO2	401.52	8.29	12	-3.71	3.1
947753-66-4	2-ethylhexyl-2-cyano-3-(4-methoxyphenyl)-3-phenylprop-2-enoate;2-ethylhexyl methoxycrylene;solastay(tm) s1;2-ethylhexyl-2-cyano-3-(4-methoxyphenyl)-3-phenylprop-2-enoate 2-ethylhexyl methoxycrylene solastay(tm) s1	NO	NO	6	NO	NO	10	TRUE	10	1	High		FALSE	161	8	YES	YES	TRUE	TRUE	356	493		not classified	not applicable		x	x	x	10	10	10	10	10	10	6	6	10	10	10	10		CCCCC(CC)COC(=O)C(C#N)=C(c1ccccc1)c1ccc(OC)cc1	C25H29NO3	391.48	6.96	12	-5.04	3.64
97416-84-7	1,1'-(isopropylidene)bis[3,5-dibromo-4-(2,3-dibromo-2-methylpropoxy)benzene];1,1'-propane-2,2-diylbis[3,5-dibromo-4-(2,3-dibromo-2-methylpropoxy)benzene];1,1'-(isopropylidene)bis[3,5-dibromo-4-(2,3-dibromo-2-methylpropoxy)benzene] 1,1'-propane-2,2-diylbis[3,5-dibromo-4-(2,3-dibromo-2-methylpropoxy)benzene]	NO	NO	6	NO	NO	10	TRUE	10	1	High		FALSE	161	8	YES	YES	TRUE	TRUE	356	493		not classified	not applicable		x	x		10	10	6	6	6	6	10	10	3	10	3	10		CC(C)(c1cc(Br)c(OCC(C)(Br)CBr)c(Br)c1)c1cc(Br)c(OCC(C)(Br)CBr)c(Br)c1	C23H24Br8O2	971.7	12	12	0	19400
97-59-6	allantoin;(2,5-dioxo-imidazolidin-4-yl)-urea;urea, (2,5-dioxo-4-imidazolidinyl)-;1-(2,5-dioxoimidazolidin-4-yl)urea;allantoin [usan:ban];allantoin (2,5-dioxo-imidazolidin-4-yl)-urea urea, (2,5-dioxo-4-imidazolidinyl)- 1-(2,5-dioxoimidazolidin-4-yl)urea allantoin [usan:ban]	NO	NO	6	NO	NO	10	TRUE	10	1	High		FALSE	161	8	YES	YES	TRUE	TRUE	356	493		not classified	not applicable			x	x	6	6	10	10	10	10	10	10	10	6	10	6		NC(=O)NC1C(=O)NC(=O)N1	C4H6N4O3	158.11	-2	12	-14	3.94e-06
98730-04-2	benoxacor;ethanone, 2,2-dichloro-1-(2,3-dihydro-3-methyl-4h-1,4-benzoxazin-4-yl)-;2h-1,4-benzoxazine, 4-(dichloroacetyl)-3,4-dihydro-3-methyl-;2,2-dichloro-1-(3-methyl-2,3-dihydro-4h-1,4-benzoxazin-4-yl)ethanone;cga154281;4-(dichloroacetyl)-3-methyl-3,4-dihydro-2h-1,4-benzoxazine;2,2-dichloro-1-(3-methyl-2,3-dihydro-benzo[1,4]oxazin-4-yl)-ethanone;benoxacor (2h-1,4-benzoxazine, 4-(dichloroacetyl)…	NO	NO	6	NO	NO	10	TRUE	10	1	High		FALSE	161	8	YES	YES	TRUE	TRUE	356	493		not classified	not applicable			x	x	6	6	10	10	6	10	6	6	10	6	10	6		CC1COc2ccccc2N1C(=O)C(Cl)Cl	C11H11Cl2NO2	260.11	2.7	8.209	-5.509	0.957
99607-70-2	cloquintocet-mexyl;acetic acid, {(5-chloro-8-quinolinyl)oxy}-, 1-methylhexyl ester;acetic acid, 2-[(5-chloro-8-quinolinyl)oxy]-, 1-methylhexyl ester;acetic acid, [(5-chloro-8-quinolinyl)oxy]-, 1-methylhexyl ester;2-[(5-chloro-8-quinolinyl)oxy]acetic acid, 1-methylhexyl ester;heptan-2-yl [(5-chloroquinolin-8-yl)oxy]acetate;1-methylhexyl [(5-chloroquinolin-8-yl)oxy]acetate;(5-chloro-quinolin-8-ylox…	NO	NO	6	NO	NO	10	TRUE	10	1	High		FALSE	161	8	YES	YES	TRUE	TRUE	356	493		not classified	not applicable		x	x	x	10	10	10	10	10	10	10	10	10	6	10	6		CCCCCC(C)OC(=O)COc1ccc(Cl)c2cccnc12	C18H22ClNO3	335.81	5.03	12	-6.97	0.212
613222-52-9	1,6-bis-[(2,2-dimethyl-3-lauroyloxy-propylidene)-amino]hexane;sika härter lh;sika hardener lh	NO	NO	7.5	YES	NO	8	TRUE	10	1	High		FALSE	161	8	YES	YES	TRUE	TRUE	356	493		not classified	not applicable			x		6	6	3	3	3	3	10	10	1	10	3	10		CCCCCCCCCCCC(=O)OCC(C)(C)C=NCCCCCCN=CC(C)(C)COC(=O)CCCCCCCCCCC	C40H76N2O4	649.01	12	12	0	7.66
68608-50-4	tallow, lithium salt	NO	NO	10	YES	NO	6	TRUE	10	1	High		FALSE	161	8	YES	YES	TRUE	TRUE	356	493		not classified	not applicable		x	x		10	10	6	6	6	6	10	10	3	10	3	10		CCCCCCCCC=CCCCCCCCC(=O)OCC(COC(=O)CCCCCCCC=CCCCCCCCC)OC(=O)CCCCCCCC=CCCCCCCCC	C57H104O6	885.39	12	12	0	2360
106-49-0	4-toluidine;4-methylaniline;4-methylaniline (4-toluidine);benzenamine, 4-methyl-;p-toluidine;p-toluidine hydrochloride;p-tolylamine;4-methyl-aniline;p-methylaniline;4-methylbenzeneamine;4-toluidine 4-methylaniline 4-methylaniline (4-toluidine) benzenamine, 4-methyl- p-toluidine p-toluidine hydrochloride p-tolylamine 4-methyl-aniline p-methylaniline 4-methylbenzeneamine	YES (Step 1)	NO	2.3	NO	NO	10	TRUE	6	10	High		TRUE	159	29.5	YES	YES	TRUE	TRUE	570	278		HARMON	CARC					3	3	3	3	3	3	3	3	6	3	6	3		Cc1ccc(N)cc1	C7H9N	107.15	1.39	5.473	-4.083	0.114
3634-83-1	benzene, 1,3-bis(isocyanatomethyl)-;1,3-bis(isocyanatomethyl)benzene;m-xylene diisocyanate;1,3-xylylene diisocyanate;isocyanic acid, m-phenylenedimethylene ester;benzene, 1,3-bis(isocyanatomethyl)- 1,3-bis(isocyanatomethyl)benzene m-xylene diisocyanate 1,3-xylylene diisocyanate isocyanic acid, m-phenylenedimethylene ester	YES (Step 1)	NO	2.3	NO	NO	10	TRUE	6	10	High		TRUE	159	29.5	YES	YES	TRUE	TRUE	570	278		JOINT	STOT RE					3	6	3	3	3	3	3	3	6	3	6	3		O=C=NCc1cccc(CN=C=O)c1	C10H8N2O2	188.18	3	7.371	-4.371	0.0734
5080-22-8	n-isopropylhydroxylamine;n-hydroxypropan-2-amine;2-propanamine, n-hydroxy-;2-hydroxylaminopropane;n-isopropylhydroxylamine n-hydroxypropan-2-amine 2-propanamine, n-hydroxy- 2-hydroxylaminopropane	YES (Step 1)	NO	2.75	NO	NO	8	TRUE	6	10	High		TRUE	158	29	YES	YES	TRUE	TRUE	572	280		JOINT	STOT RE					3	3	6	3	6	3	3	3	6	3	6	3		CC(C)NO	C3H9NO	75.107	0.15	6.112	-5.962	0.0411
127-06-0	acetoxime;propan-2-one oxime;2-propanone, oxime;acetone oxime;n-hydroxypropan-2-imine;acetone, oxime ;acetoxime propan-2-one oxime 2-propanone, oxime acetone oxime n-hydroxypropan-2-imine acetone, oxime	NO	NO	6	NO	NO	8	TRUE	3	10	High		FALSE	157	28.5	YES	YES	TRUE	TRUE	573	281		JOINT	CARC					1	1	1	1	3	1	1	1	3	3	3	3		CC(C)=NO	C3H7NO	73.091	0.12	4	-3.88	0.0635
872-36-6	vinylene carbonate;1,3-dioxol-2-one;vinylene carbonate 1,3-dioxol-2-one	NO	NO	6	NO	YES	8	TRUE	3	10	High		FALSE	157	28.5	YES	YES	TRUE	TRUE	573	281		JOINT	STOT RE					1	1	1	1	3	1	1	1	3	1	3	3		O=C1OC=CO1	C3H2O3	86.043	-0.55	4	-4.55	0.0186
106-94-5	1-bromopropane;propane, 1-bromo-;n-propyl bromide;1bromopropane;npropyl bromide;1-bromopropane propane, 1-bromo- n-propyl bromide 1bromopropane npropyl bromide	NO	NO	7	NO	NO	8	TRUE	1	10	High		FALSE	157	28.5	YES	YES	TRUE	TRUE	573	281		HARMON	REPR-STOT RE					1	1	1	1	1	1	1	1	1	1	1	1		CCCBr	C3H7Br	123	2.1	4	-1.9	0.229
68477-33-8	gases (petroleum), c3-4, isobutane-rich;gases, petroleum, c3-4, isobutane-rich;gases, petroleum, c3-4, isobutane rich;gases(petroleum),c34,isobutanerichifthey contain> 0,1%w/w butadiene;gases (petroleum), c3-4, isobutane-rich gases, petroleum, c3-4, isobutane-rich gases, petroleum, c3-4, isobutane rich gases(petroleum),c34,isobutanerichifthey contain> 0,1%w/w butadiene	NO	NO	7	NO	NO	8	TRUE	1	10	High		FALSE	157	28.5	YES	YES	TRUE	TRUE	573	281		HARMON	CARC-MUTA					1	1	1	1	1	1	1	1	1	1	1	1		CC(C)C	C4H10	58.119	2.76	4	-1.24	0.508
64741-99-7	extracts (petroleum), light naphtha solvent;extracts, petroleum, light naphtha solvent;extracts (petroleum), light naphtha solvent extracts, petroleum, light naphtha solvent	NO	NO	8	NO	NO	6	TRUE	3	10	High		FALSE	157	28.5	YES	YES	TRUE	TRUE	573	281		JOINT	CARC-MUTA-REPR-STOT RE					1	1	1	1	1	1	1	1	3	1	3	1		c1ccccc1	C6H6	78.107	2.13	4	-1.87	1.54
26266-58-0	sorbitan, tri-9-octadecenoate, (z,z,z)-;1,2,3,4,5-penta-o--(9e)-octadec-9-enoylhexitol;sorbitan, tri-9-octadecenoate, (z,z,z)- 1,2,3,4,5-penta-o--(9e)-octadec-9-enoylhexitol	NO	NO	7	NO	NO	8	TRUE	10	1	High		FALSE	157	7.8	YES	YES	TRUE	TRUE	573	711		not classified	not applicable		x	x		10	10	6	6	6	6	10	10	3	10	3	10		CCCCCCCCC=CCCCCCCCC(=O)OCC(C(C(C(CO)OC(=O)CCCCCCCC=CCCCCCCCC)OC(=O)CCCCCCCC=CCCCCCCCC)OC(=O)CCCCCCCC=CCCCCCCCC)OC(=O)CCCCCCCC=CCCCCCCCC	C96H174O11	1504.3	12	12	0	408000
36631-30-8	tris(8-methylnonyl) benzene-1,2,4-tricarboxylate;1,2,4-benzenetricarboxylic acid, triisodecyl ester;triisodecyl benzene-1,2,4-tricarboxylate;triisodecyl trimellitate;tris(8-methylnonyl) benzene-1,2,4-tricarboxylate 1,2,4-benzenetricarboxylic acid, triisodecyl ester triisodecyl benzene-1,2,4-tricarboxylate triisodecyl trimellitate	NO	NO	7	NO	NO	8	TRUE	10	1	High		FALSE	157	7.8	YES	YES	TRUE	TRUE	573	711		not classified	not applicable			x		6	6	3	3	3	3	10	10	1	10	3	10		CC(C)CCCCCCCOC(=O)c1ccc(C(=O)OCCCCCCCC(C)C)cc1C(=O)OCCCCCCCC(C)C	C39H66O6	630.91	12	12	0	6.42
62125-22-8	2,2-bis[[(1-oxoisooctadecyl)oxy]methyl]-1,3-propanediyl bis(isooctadecanoate);3-[(16-methylheptadeinecsanoyl)oxy]-2,2-bis{[(16-methylheptadeinecsanoyl)oxy]methyl}propyl 16-methylheptadeinecsanoate;isooctadecanoic acid, 2,2-bis[[(1-oxoisooctadecyl)oxy]methyl]-1,3-propanediyl ester;fatty acids c16 – 18 ( even numbered), c18 branched tetra esters with pentaerythritol;2,2-bis[[(1-oxoisooctadecyl)oxy]…	NO	NO	7	NO	NO	8	TRUE	10	1	High		FALSE	157	7.8	YES	YES	TRUE	TRUE	573	711		not classified	not applicable		x	x		10	10	6	6	6	6	10	10	3	10	3	10		CC(C)CCCCCCCCCCCCCCC(=O)OCC(COC(=O)CCCCCCCCCCCCCCC(C)C)(COC(=O)CCCCCCCCCCCCCCC(C)C)COC(=O)CCCCCCCCCCCCCCC(C)C	C77H148O8	1201.9	12	12	0	32900
68541-50-4	isooctadecanoic acid, 2-ethyl-2-[[(1-oxoisooctadecyl)oxy]methyl]-1,3-propanediyl ester;2-ethyl-2-[[(1-oxoisooctadecyl)oxy]methyl]-1,3-propanediyl bis(isooctadecanoate);2,2-bis{[(16-methylheptadeinecsanoyl)oxy]methyl}butyl 16-methylheptadeinecsanoate;isooctadecanoic acid, 2-ethyl-2-oo(1-oxoisooctadecyl)oxyamethyla-1,3-propanediy;isooctadecanoic acid, 2-ethyl-2-[[(1-oxoisooctadecyl)oxy]methyl]-1,3-…	NO	NO	7	NO	NO	8	TRUE	10	1	High		FALSE	157	7.8	YES	YES	TRUE	TRUE	573	711		not classified	not applicable		x	x		10	10	6	6	6	6	10	10	3	10	3	10		CCC(COC(=O)CCCCCCCCCCCCCCC(C)C)(COC(=O)CCCCCCCCCCCCCCC(C)C)COC(=O)CCCCCCCCCCCCCCC(C)C	C60H116O6	933.51	12	12	0	2980
72361-35-4	triisotridecyl benzene-1,2,4-tricarboxylate;tris(11-methyldodeinecsyl) benzene-1,2,4-tricarboxylate;1,2,4-benzenetricarboxylic acid, triisotridecyl ester;tris(11-methyldodecyl) benzene-1,2,4-tricarboxylate;diplast tm 13;triisotridecyl benzene-1,2,4-tricarboxylate tris(11-methyldodeinecsyl) benzene-1,2,4-tricarboxylate 1,2,4-benzenetricarboxylic acid, triisotridecyl ester tris(11-methyldodecyl) be…	NO	NO	7	NO	NO	8	TRUE	10	1	High		FALSE	157	7.8	YES	YES	TRUE	TRUE	573	711		not classified	not applicable			x		6	6	6	6	6	6	10	10	3	10	3	10		CC(C)CCCCCCCCCCOC(=O)c1ccc(C(=O)OCCCCCCCCCCC(C)C)cc1C(=O)OCCCCCCCCCCC(C)C	C48H84O6	757.14	12	12	0	115
7529-22-8	morpholine, 4-methyl-, 4-oxide;4-methylmorpholine 4-oxide;4-methylmorpholine 4-oxide monohydrate;4-methylmorpholine 4-oxide, monohydrate;morpholine, 4-methyl-, 4-oxide 4-methylmorpholine 4-oxide 4-methylmorpholine 4-oxide monohydrate 4-methylmorpholine 4-oxide, monohydrate	NO	NO	7	NO	NO	8	TRUE	10	1	High		FALSE	157	7.8	YES	YES	TRUE	TRUE	573	711		not classified	not applicable		x	x	x	10	10	10	10	10	10	10	10	10	10	10	10		CN1(=O)CCOCC1	C5H11NO2	117.14	-1.12	10.965	-12.085	0.0267
26523-78-4	phenol, nonyl-, phosphite (3:1);tris(nonylphenyl) phosphite;tris(2-nonylphenyl) phosphite;phenol, nonyl-, phosphite (3:1) tris(nonylphenyl) phosphite tris(2-nonylphenyl) phosphite	NO (Toxicity Score of 10 not confirmed)	NO	5.5	NO	NO	10	TRUE	10	1	Low		FALSE	156	7.75	YES	YES	TRUE	TRUE	584	717		OTH-YES	REPR		x	x		10	10	6	6	6	6	10	10	3	10	3	10		CCCCCCCCCc1ccccc1OP(Oc1ccccc1CCCCCCCCC)Oc1ccccc1CCCCCCCCC	C45H69O3P	688.97	12	12	0	439000
25723-16-4	poly[oxy(methyl-1,2-ethanediyl)], ?-hydro-?-hydroxy-, ether with 2-ethyl-2-(hydroxymethyl)-1,3-propanediol (3:1);poly[oxy(methyl-1,2-ethanediyl)], .alpha.-hydro-.omega.-hydroxy-, ether with 2-ethyl-2-(hydroxymethyl)-1,3-propanediol (3:1);propylidynetrimethanol, propoxylated;propylidenetrimethanol (tmp), propoxylated;poly[oxy(methyl-1,2-ethanediyl)], ?-hydro-?-hydroxy-, ether with 2-ethyl-2-(hydro…	NO	NO	5.5	NO	NO	10	TRUE	10	1	High		FALSE	156	7.75	YES	YES	TRUE	TRUE	584	717		not classified	not applicable		x	x	x	10	10	10	10	10	10	10	10	10	10	10	10		CCC(COCC(C)OC(C)COCC(C)OC(C)COCC(C)O)(COC(C)COCC(C)OC(C)COCC(C)OC(C)CO)COC(C)COCC(C)OC(C)COCC(C)OC(C)CO	C51H104O18	1005.3	1.34	12	-10.66	0.0019
25791-96-2	poly[oxy(methyl-1,2-ethanediyl)], .alpha.,.alpha.',.alpha.''-1,2,3-propanetriyltris[.omega.-hydroxy-;poly[oxy(methyl-1,2-ethanediyl)], ?,?’,?’’-1,2,3-propanetriyltris[?-hydroxy-;poly[oxy(methyl-1,2-ethanediyl)], .alpha.,.alpha.',.alpha.''-1,2,3-propanetriyltris[.omega.-hydroxy- poly[oxy(methyl-1,2-ethanediyl)], ?,?’,?’’-1,2,3-propanetriyltris[?-hydroxy-	NO	NO	5.5	NO	NO	10	TRUE	10	1	High		FALSE	156	7.75	YES	YES	TRUE	TRUE	584	717		not classified	not applicable		x	x	x	10	10	10	10	10	10	10	10	10	10	10	10		CC(CO)OC(C)COCC(C)OC(C)COCC(C)OCC(O)COCC(C)OCC(C)OC(C)COCC(C)OC(C)CO	C33H68O13	672.85	-0.81	12	-12.81	0.000783
50586-59-9	poly(oxy-1,2-ethanediyl), ?-hydro-?-hydroxy-, ether with 2-ethyl-2-(hydroxymethyl)-1,3-propanediol (3:1);poly(oxy-1,2-ethanediyl), .alpha.-hydro-.omega.-hydroxy-, ether with 2-ethyl-2-(hydroxymethyl)-1,3-propanediol (3:1);propylidynetrimethanol, ethoxylated;poly(oxy-1,2-ethanediyl), ?-hydro-?-hydroxy-, ether with 2-ethyl-2-(hydroxymethyl)-1,3-propanediol (3:1) poly(oxy-1,2-ethanediyl), .alpha.-hy…	NO	NO	5.5	NO	NO	10	TRUE	10	1	High		FALSE	156	7.75	YES	YES	TRUE	TRUE	584	717		not classified	not applicable		x	x	x	10	10	10	10	10	10	10	10	10	10	10	10		CCC(COCCOCCOCCOCCOCCO)(COCCOCCOCCOCCOCCO)COCCOCCOCCOCCOCCO	C36H74O18	794.93	-2	12	-14	2.8e-05
52625-13-5	poly[oxy(methyl-1,2-ethanediyl)], ?-hydro-?-hydroxy-, ether with d-glucitol (6:1);poly[oxy(methyl-1,2-ethanediyl)], .alpha.-hydro-.omega.-hydroxy-, ether with d-glucitol (6:1);d-glucitol, propoxylated;poly(propylene oxide) sorbitol ether;sorbitol, propoxylated;poly[oxy(methyl-1,2-ethanediyl)], ?-hydro-?-hydroxy-, ether with d-glucitol (6:1) poly[oxy(methyl-1,2-ethanediyl)], .alpha.-hydro-.omega.-…	NO	NO	5.5	NO	NO	10	TRUE	10	1	High		FALSE	156	7.75	YES	YES	TRUE	TRUE	584	717		not classified	not applicable		x	x	x	10	10	10	10	10	10	10	10	10	6	10	10		CC(CO)OCC(C)OC(C)COC(C(COC(C)COC(C)COCC(C)O)OCC(C)OCC(C)OC(C)CO)C(C(COCC(C)OCC(C)OC(C)CO)OC(C)COCC(C)OCC(C)O)OC(C)COC(C)COCC(C)O	C60H122O24	1227.5	-2	12	-14	5.29e-06
91082-17-6	c10-21 sulfonic acids phenyl esters	NO	NO	5.5	NO	NO	10	TRUE	10	1	High		FALSE	156	7.75	YES	YES	TRUE	TRUE	584	717		not classified	not applicable		x	x	x	10	10	6	10	6	10	10	10	6	10	6	6		CCCCCCCCCCCCCCCS(=O)(=O)Oc1ccccc1	C21H36O3S	368.56	8.22	10.712	-2.492	9.21
91-76-9	benzoguanamine;2,4-diamino-6-phenyl-1,3,5-triazine;2,4-diamino-6-phenyl-s-triazine;6-phenyl-1,3,5-triazine-2,4-diyldiamine;6-phenyl-1,3,5-triazine-2,4-diamine;1,3,5-triazine-2,4-diamine, 6-phenyl-;s-triazine, 2,4-diamino-6-phenyl-;benzoguanamine 2,4-diamino-6-phenyl-1,3,5-triazine 2,4-diamino-6-phenyl-s-triazine 6-phenyl-1,3,5-triazine-2,4-diyldiamine 6-phenyl-1,3,5-triazine-2,4-diamine 1,3,5-tri…	NO	NO	5.5	NO	NO	10	TRUE	10	1	High		FALSE	156	7.75	YES	YES	TRUE	TRUE	584	717		not classified	not applicable		x	x	x	10	10	10	10	10	10	10	10	10	10	10	10		Nc1nc(-c2ccccc2)nc(N)n1	C9H9N5	187.2	1.36	10.135	-8.775	0.0129
28553-12-0	diisononyl phthalate;1,2-benzenedicarboxylic acid, 1,2-diisononyl ester;diisononylphthalate;1,2-benzenedicarboxylic acid, diisononyl ester;di-''isononyl'' phthalate;bis(7-methyloctyl) benzene-1,2-dicarboxylate;di-isononylphthalate;di-isononyl phthalate (dinp2);diisononyl phthalate 1,2-benzenedicarboxylic acid, 1,2-diisononyl ester diisononylphthalate 1,2-benzenedicarboxylic acid, diisononyl ester…	NO	NO	9	NO	NO	6	TRUE	10	1	High		FALSE	155	7.7	YES	YES	TRUE	TRUE	591	724		not classified	not applicable		x	x		10	10	6	6	6	6	6	6	6	10	6	6		CC(C)CCCCCCOC(=O)c1ccccc1C(=O)OCCCCCCC(C)C	C26H42O4	418.59	9.37	12	-2.63	1.89
68439-50-9	alcohols, c12-14, ethoxylated;c12-14 alcohols ethoxylated;c12-14ae7;alcohols, c12-14(even numbered), ethoxylated;alcohols, c12-14, ethoxylated c12-14 alcohols ethoxylated c12-14ae7 alcohols, c12-14(even numbered), ethoxylated	NO	NO	9	NO	NO	6	TRUE	10	1	High		FALSE	155	7.7	YES	YES	TRUE	TRUE	591	724		not classified	not applicable		x	x	x	10	10	10	10	10	10	10	10	10	10	10	10		CCCCCCCCCCCCOCCOCCOCCOCCOCCO	C22H46O6	406.58	3.4	12	-8.6	0.139
68515-48-0	diisononyl phthalate;diisononyl phthalate, technical grade;di-isononyl phthalate;1,2-benzenedicarboxylic acid, di-c8-10-branched alkyl esters, c9-rich;1,2-benzenedicarboxylic acid, di-c8-10-branched alkyl esters, c9 rich;di-isononyl phthalate (dinp1);di(c8-10, c9 rich) branched alkyl phthalates;diisononyl phthalate diisononyl phthalate, technical grade di-isononyl phthalate 1,2-benzenedicarboxyli…	NO	NO	9	NO	NO	6	TRUE	10	1	Low		FALSE	155	7.7	YES	YES	TRUE	TRUE	591	724		OTH-NO	REPR		x	x		10	10	6	6	6	6	6	6	6	10	6	6		CC(C)CCCCCCOC(=O)c1ccccc1C(=O)OCCCCCCC(C)C	C26H42O4	418.59	9.37	12	-2.63	1.89
68515-49-1	diisodecyl phthalate;di-isodecyl phthalate;1,2-benzenedicarboxylic acid, di-c9-11-branched alkyl esters, c10-rich;1,2-benzenedicarboxylic acid, di-c9-11-branched alkyl esters, c10 rich;not available;not a single isomer substance (see remarks below);diisodecyl phthalate di-isodecyl phthalate 1,2-benzenedicarboxylic acid, di-c9-11-branched alkyl esters, c10-rich 1,2-benzenedicarboxylic acid, di-c9-…	NO	NO	9	NO	NO	6	TRUE	10	1	High		FALSE	155	7.7	YES	YES	TRUE	TRUE	591	724		not classified	not applicable			x		6	6	6	6	6	6	6	6	3	10	6	10		CC(C)CCCCCCCOC(=O)c1ccccc1C(=O)OCCCCCCCC(C)C	C28H46O4	446.64	10.36	12	-1.64	3.58
42978-66-5	2-propenoic acid, (1-methyl-1,2-ethanediyl)bis[oxy(methyl-2,1-ethanediyl)] ester;(1-methyl-1,2-ethanediyl)bis[oxy(methyl-2,1-ethanediyl)] diacrylate;1-[(1-{[1-(acryloyloxy)propan-2-yl]oxy}propan-2-yl)oxy]propan-2-yl acrylate;2-{2-[2-(acryloyloxy)-1-methylethoxy]-1-methylethoxy}-1-methylethyl acrylate;2-propenoic acid, (1-methyl-1,2-ethanediyl)bis[oxy(methyl-2,1-ethanediyl)] ester (1-methyl-1,2-et…	NO	NO	6.5	NO	NO	8	TRUE	10	1	High		FALSE	153	7.6	YES	YES	TRUE	TRUE	595	728		not classified	not applicable		x	x	x	6	10	10	10	10	10	6	6	10	6	10	6		CC(COC(C)COC(C)COC(=O)C=C)OC(=O)C=C	C15H24O6	300.33	1.82	10.268	-8.448	0.00325
78-59-1	2-cyclohexen-1-one, 3,5,5-trimethyl-;isophorone;isophorene;3,5,5-trimethylcyclohex-2-enone (isophorone);3,5,5-trimethylcyclohex-2-enone;3,5,5-trimethylcyclohex-2-en-1-one;3,5,5trimethylcyclohex2enone (isophorone);3,5,5-trimethyl-2-cyclohexene-1-one;1,1,3-trimethyl-3-cyclohexene-5-one;1,5,5-trimethyl-3-oxocyclohexene;1-cyclohexen-3-one, 1,5,5-trimethyl-;3,5,5-trimethyl-2-cyclohexenone;isoacetophor…	NO	NO	7	NO	NO	6	TRUE	3	10	High		FALSE	151	25.5	YES	YES	TRUE	TRUE	596	286		HARMON	CARC					3	3	3	3	3	3	1	3	3	3	3	3		CC1CC(C)(C)CC(=O)C=1	C9H14O	138.2	1.7	5.266	-3.566	0.151
13749-61-6	n-isopropylmethacrylamide;2-methyl-n-(propan-2-yl)prop-2-enamide;n-isopropyl-2-methylacrylamide;2-propenamide, 2-methyl-n-(1-methylethyl)-;n-isopropylmethacrylamide 2-methyl-n-(propan-2-yl)prop-2-enamide n-isopropyl-2-methylacrylamide 2-propenamide, 2-methyl-n-(1-methylethyl)-	YES (Step 1)	NO	1.3	NO	NO	10	TRUE	6	10	High		TRUE	149	24.5	YES	YES	TRUE	TRUE	597	287		JOINT	STOT RE					3	6	6	6	6	6	3	3	6	3	6	6		CC(C)NC(=O)C(C)=C	C7H13NO	127.18	1.11	6.945	-5.835	0.0423
2162-73-4	benzene, 2,4-diisocyanate-1,3,5-tris(1-methylethyl)-;2,4,6-triisopropyl-m-phenylene diisocyanate;2,4-diisocyanato-1,3,5-tri(propan-2-yl)benzene;benzene, 2,4-diisocyanato-1,3,5-tris(1-methylethyl)-;2,4-diisocyanato-1,3,5-triisopropylbenzene;benzene, 2,4-diisocyanate-1,3,5-tris(1-methylethyl)- 2,4,6-triisopropyl-m-phenylene diisocyanate 2,4-diisocyanato-1,3,5-tri(propan-2-yl)benzene benzene, 2,4-di…	YES (Step 1)	NO	1.3	NO	NO	10	TRUE	6	10	High		TRUE	149	24.5	YES	YES	TRUE	TRUE	597	287		JOINT	CARC					6	6	6	6	6	6	6	6	6	6	6	6		CC(C)c1cc(C(C)C)c(N=C=O)c(C(C)C)c1N=C=O	C17H22N2O2	286.36	7.56	10.08	-2.52	3.21
2778-42-9	1,3-bis(1-isocyanato-1-methylethyl)benzene;benzene, 1,3-bis(1-isocyanato-1-methylethyl)-;1,3-bis(2-isocyanatopropan-2-yl)benzene;isocyanic acid, alpha,alpha,alpha',alpha'-tetramethyl-m-xylylene ester (8ci);1,3-bis(1-isocyanato-1-methylethyl)benzene benzene, 1,3-bis(1-isocyanato-1-methylethyl)- 1,3-bis(2-isocyanatopropan-2-yl)benzene isocyanic acid, alpha,alpha,alpha',alpha'-tetramethyl-m-xylylene…	YES (Step 1)	NO	1.3	NO	NO	10	TRUE	6	10	High		TRUE	149	24.5	YES	YES	TRUE	TRUE	597	287		INDIV	STOT RE					6	6	6	6	6	6	6	6	6	6	6	6		CC(C)(c1cccc(C(C)(C)N=C=O)c1)N=C=O	C14H16N2O2	244.28	4.74	8.621	-3.881	2.06
34454-97-2	1-butanesulfonamide, 1,1,2,2,3,3,4,4,4-nonafluoro-n-(2-hydroxyethyl)-n-methyl-;1,1,2,2,3,3,4,4,4-nonafluoro-n-(2-hydroxyethyl)-n-methylbutane-1-sulphonamide;1,1,2,2,3,3,4,4,4-nonafluoro-n-(2-hydroxyethyl)-n-methylbutane-1-sulfonamide;1-butanesulfonamide, 1,1,2,2,3,3,4,4,4-nonafluoro-n-(2-hydroxyethyl)-n-methyl- 1,1,2,2,3,3,4,4,4-nonafluoro-n-(2-hydroxyethyl)-n-methylbutane-1-sulphonamide 1,1,2,2,…	YES (Step 1)	NO	1.3	NO	NO	10	TRUE	6	10	High		TRUE	149	24.5	YES	YES	TRUE	TRUE	597	287		JOINT	REPR-STOT RE					6	6	6	6	6	6	6	6	6	6	6	6		CN(CCO)S(=O)(=O)C(F)(F)C(F)(F)C(F)(F)C(F)(F)F	C7H8F9NO3S	357.18	2.83	7.466	-4.636	1.12
378-44-9	betamethasone;pregna-1,4-diene-3,20-dione, 9-fluoro-11,17,21-trihydroxy-16-methyl-, (11?,16?)-;(11beta,16beta)-9-fluoro-11,17,21-trihydroxy-16-methylpregna-1,4-diene-3,20-dione;pregna-1,4-diene-3,20-dione, 9-fluoro-11,17,21-trihydroxy-16-methyl-, (11.beta.,16.beta.)-;(11beta,16beta)-9-fluro-11,17,21-trihydroxy-16-methylpregna-1,4-diene-3,20-dione;9-fluoro-11,17,21-trihydroxy-16-methylpregna-1,4-d…	YES (Step 1)	NO	1.3	NO	NO	10	TRUE	6	10	High		TRUE	149	24.5	YES	YES	TRUE	TRUE	597	287		JOINT	REPR-STOT RE					6	6	6	6	6	6	6	6	6	6	6	6		CC1CC2C3CCC4=CC(=O)C=CC4(C)C3(F)C(O)CC2(C)C1(O)C(=O)CO	C22H29FO5	392.44	1.83	7.474	-5.644	0.101
3874-54-2	4-chloro-4'-fluorobutyrophenone;4-chloro-1-(4-fluorophenyl)butan-1-one;1-butanone, 4-chloro-1-(4-fluorophenyl)-;butyrophenone, 4-chloro-4'-fluoro-;4-chloro-4'-fluorobutyrophenone 4-chloro-1-(4-fluorophenyl)butan-1-one 1-butanone, 4-chloro-1-(4-fluorophenyl)- butyrophenone, 4-chloro-4'-fluoro-	YES (Step 1)	NO	1.3	NO	NO	10	TRUE	6	10	High		TRUE	149	24.5	YES	YES	TRUE	TRUE	597	287		JOINT	MUTA					3	6	6	3	3	6	3	3	6	6	6	3		O=C(CCCCl)c1ccc(F)cc1	C10H10ClFO	200.63	3.11	6.647	-3.537	1.18
60-34-4	methylhydrazine;methyl hydrazine;methyl-hydrazine;n-aminomethylamine (methyl hydrazine);hydrazine, methyl-;monomethylhydrazine;monomethyl hydrazine;methylhydrazine methyl hydrazine methyl-hydrazine n-aminomethylamine (methyl hydrazine) hydrazine, methyl- monomethylhydrazine monomethyl hydrazine	YES (Step 1)	NO	1.3	NO	NO	10	TRUE	6	10	High		TRUE	149	24.5	YES	YES	TRUE	TRUE	597	287		JOINT	CARC					3	3	3	3	3	3	3	3	6	3	6	3		CNN	CH6N2	46.071	-1.05	4.839	-5.889	0.0185
6610-29-3	4-methylthiosemicarbazide;n-methylhydrazinecarbothioamide;hydrazinecarbothioamide, n-methyl-;semicarbazide, 4-methyl-3-thio-;n-methylhydrazinecarbothioamide (hydrazinecarbothioamide, n-methyl-);semicarbazide, 4-methyl-3-thio- (8ci);4-methylthiosemicarbazide n-methylhydrazinecarbothioamide hydrazinecarbothioamide, n-methyl- semicarbazide, 4-methyl-3-thio- n-methylhydrazinecarbothioamide (hydrazine…	YES (Step 1)	NO	1.3	NO	NO	10	TRUE	6	10	High		TRUE	149	24.5	YES	YES	TRUE	TRUE	597	287		JOINT	STOT RE					3	3	6	6	6	3	3	3	6	3	6	3		CNC(=S)NN	C2H7N3S	105.16	-1.21	6.017	-7.227	0.00297
868-85-9	dimethyl hydrogen phosphite;phosphonic acid, dimethyl ester;dimethyl phosphite;dimethyl phosphonate;dimethyl hydrogen phosphate;dimethyl hydrogen phosphite (phosphonic acid, dimethyl ester) (dimethyl phosphite);dimethyl hydrogen phosphite phosphonic acid, dimethyl ester dimethyl phosphite dimethyl phosphonate dimethyl hydrogen phosphate dimethyl hydrogen phosphite (phosphonic acid, dimethyl ester…	YES (Step 1)	NO	1.3	NO	NO	10	TRUE	6	10	High		TRUE	149	24.5	YES	YES	TRUE	TRUE	597	287		JOINT	CARC-MUTA					1	1	3	3	3	3	3	3	6	3	6	3		COP(=O)OC	C2H7O3P	110.05	-1.13	4	-5.13	0.021
88-73-3	1-chloro-2-nitrobenzene;chloro-2-nitrobenzene, 1-;2-chloro-1-nitrobenzene;benzene, 1-chloro-2-nitro-;o-chloronitrobenzene;1-chloro-2-nitrobenzene chloro-2-nitrobenzene, 1- 2-chloro-1-nitrobenzene benzene, 1-chloro-2-nitro- o-chloronitrobenzene	YES (Step 1)	NO	1.3	NO	NO	10	TRUE	6	10	High		TRUE	149	24.5	YES	YES	TRUE	TRUE	597	287		INDIV	CARC-MUTA-REPR-STOT RE					3	3	3	3	3	3	3	3	6	3	6	3		O=N(=O)c1ccccc1Cl	C6H4ClNO2	157.55	2.24	5.66	-3.42	0.551
88-74-4	2-nitroaniline;benzenamine, 2-nitro-;o-nitroaniline;2-nitro-phenylamine;aniline, o-nitro-;2-nitrobenzenamine;2-nitroaniline (o-nitroaniline);2-nitroaniline benzenamine, 2-nitro- o-nitroaniline 2-nitro-phenylamine aniline, o-nitro- 2-nitrobenzenamine 2-nitroaniline (o-nitroaniline)	YES (Step 1)	NO	1.3	NO	NO	10	TRUE	6	10	High		TRUE	149	24.5	YES	YES	TRUE	TRUE	597	287		HARMON	STOT RE					6	6	6	6	6	6	3	3	6	6	6	6		Nc1ccccc1N(=O)=O	C6H6N2O2	138.12	1.85	7.468	-5.618	0.101
68475-60-5	alkanes, c4-5;alkanes,c45,iftheycontain>0,1%w/w butadiene;alkanes, c4-5 alkanes,c45,iftheycontain>0,1%w/w butadiene	NO	NO	6	NO	NO	8	TRUE	1	10	High		FALSE	149	24.5	YES	YES	TRUE	TRUE	597	287		HARMON	CARC-MUTA					1	1	1	1	1	1	1	1	1	1	1	1		CC(C)C	C4H10	58.119	2.76	4	-1.24	0.508
132900-75-5	2-methylbenzene-1,4-diyl bis{4-[4-(acryloyloxy)butoxy]benzoate};nap-1;me-3k4a2;2-methylbenzene-1,4-diyl bis{4-[4-(acryloyloxy)butoxy]benzoate} nap-1 me-3k4a2	NO	NO	6	NO	YES	8	TRUE	10	1	High		FALSE	149	7.4	YES	YES	TRUE	TRUE	597	742		not classified	not applicable		x			10	6	6	6	6	6	6	6	6	6	6	6		Cc1cc(OC(=O)c2ccc(OCCCCOC(=O)C=C)cc2)ccc1OC(=O)c1ccc(OCCCCOC(=O)C=C)cc1	C35H36O10	616.62	8.22	12	-3.78	0.0566
13826-35-2	3-phenoxybenzylic alcohol;benzenemethanol, 3-phenoxy-;(3-phenoxyphenyl)methanol;3-phenoxybenzyl alcohol;benzyl alcohol, m-phenoxy-;3-phenoxybenzenemethanol	NO	NO	6	NO	NO	8	TRUE	10	1	High		FALSE	149	7.4	YES	YES	TRUE	TRUE	597	742		not classified	not applicable		x	x	x	6	10	10	10	10	10	6	6	10	6	10	10		OCc1cccc(Oc2ccccc2)c1	C13H12O2	200.22	3.13	9.842	-6.712	0.242
1843-05-6	2-hydroxy-4-n-octoxybenzophenone;methanone, [2-hydroxy-4-(octyloxy)phenyl]phenyl-;methanone, 2-hydroxy-4-(octyloxy)phenyl phenyl-;2-hydroxy-4-(octyloxy)benzophenone;octabenzone;[2-hydroxy-4-(octyloxy)phenyl](phenyl)methanone;methanone, 2-hydroxy-4-(octyloxy)phenyl phenyl-;benzophenone, 2-hydroxy-4-(octyloxy)-;methanone, Х2-hydroxy-4-(octyloxy)phenylеphenyl-;(2-hydroxy-4-(octyloxy)phenyl)phenylmet…	NO	NO	6	NO	NO	8	TRUE	10	1	High		FALSE	149	7.4	YES	YES	TRUE	TRUE	597	742		not classified	not applicable		x	x	x	10	10	10	10	10	10	6	6	10	10	10	6		CCCCCCCCOc1ccc(C(=O)c2ccccc2)c(O)c1	C21H26O3	326.41	6.96	12	-5.04	1.46
19321-40-5	9-octadecenoic acid (z)-, 2,2-bis[[(1-oxo-9-octadecenyl)oxy]methyl]-1,3-propanediyl ester, (z,z)-;pentaerythritol tetraoleate;3-[(9z)-octadec-9-enoyloxy]-2,2-bis{[(9z)-octadec-9-enoyloxy]methyl}propyl (9z)-octadec-9-enoate;9-octadecenoic acid, (z)-, 2,2-bis[[(1-oxo-9-octadecenyl)oxy]methyl]-1,3-propanediyl ester, (z,z)-;9-octadecenoic acid (9z)-, 2,2-bis[[[(9z)-1-oxo-9-octadecenyl]oxy]methyl]-1,3…	NO	NO	6	NO	NO	8	TRUE	10	1	High		FALSE	149	7.4	YES	YES	TRUE	TRUE	597	742		not classified	not applicable		x	x		10	10	6	6	6	6	10	10	3	10	3	10		CCCCCCCCC=CCCCCCCCC(=O)OCC(COC(=O)CCCCCCCC=CCCCCCCCC)(COC(=O)CCCCCCCC=CCCCCCCCC)COC(=O)CCCCCCCC=CCCCCCCCC	C77H140O8	1193.9	12	12	0	119000
26942-95-0	1,2,3-propanetriyl triisooctadecanoate;propane-1,2,3-triyl tris(16-methylheptadeinecsanoate);isooctadecanoic acid, 1,2,3-propanetriyl ester;1,2,3-propanetriyl tris(16-methylheptadecanoate);1,2,3-propanetriyl triisooctadecanoate propane-1,2,3-triyl tris(16-methylheptadeinecsanoate) isooctadecanoic acid, 1,2,3-propanetriyl ester 1,2,3-propanetriyl tris(16-methylheptadecanoate)	NO	NO	6	NO	NO	8	TRUE	10	1	High		FALSE	149	7.4	YES	YES	TRUE	TRUE	597	742		not classified	not applicable		x	x		10	10	6	6	6	6	10	10	3	10	3	10		CC(C)CCCCCCCCCCCCCCC(=O)OCC(COC(=O)CCCCCCCCCCCCCCC(C)C)OC(=O)CCCCCCCCCCCCCCC(C)C	C57H110O6	891.43	12	12	0	899
29598-76-3	propanoic acid, 3-(dodecylthio)-, 1,1'-[2,2-bis[[3-(dodecylthio)-1-oxopropoxy]methyl]-1,3-propanediyl] ester;propanoic acid, 3-(dodecylthio)-, 2,2-bis[[3-(dodecylthio)-1-oxopropoxy]methyl]-1,3-propanediyl ester;2,2-bis[[3-(dodecylthio)-1-oxopropoxy]methyl]propane-1,3-diyl bis[3-(dodecylthio)propionate];3-{[3-(dodecylsulfanyl)propanoyl]oxy}-2,2-bis({[3-(dodecylsulfanyl)propanoyl]oxy}methyl)propyl …	NO	NO	6	NO	NO	8	TRUE	10	1	High		FALSE	149	7.4	YES	YES	TRUE	TRUE	597	742		not classified	not applicable		x	x		10	6	6	6	6	6	10	10	3	10	3	10		CCCCCCCCCCCCSCCC(=O)OCC(COC(=O)CCSCCCCCCCCCCCC)(COC(=O)CCSCCCCCCCCCCCC)COC(=O)CCSCCCCCCCCCCCC	C65H124O8S4	1161.9	12	12	0	168
41669-30-1	isooctadecanoic acid, isooctadecyl ester;16-methylheptadecyl 16-methylheptadecanoate;isooctadecyl isooctadecanoate;isooctadecanoic acid, isooctadecyl ester 16-methylheptadecyl 16-methylheptadecanoate isooctadecyl isooctadecanoate	NO	NO	6	NO	NO	8	TRUE	10	1	High		FALSE	149	7.4	YES	YES	TRUE	TRUE	597	742		not classified	not applicable		x	x		10	6	6	6	6	6	10	10	3	10	3	10		CC(C)CCCCCCCCCCCCCCCOC(=O)CCCCCCCCCCCCCCC(C)C	C36H72O2	536.93	12	12	0	473
52-51-7	2-bromo-2-nitro-1,3-propanediol;1,3-propanediol, 2-bromo-2-nitro-;bronopol;2-bromo-2-nitropropane-1,3-diol;bronopol (2-bromo-2-nitro-1,3-propanediol);2-bromo-2-nitro-1,3-propanediol 1,3-propanediol, 2-bromo-2-nitro- bronopol 2-bromo-2-nitropropane-1,3-diol bronopol (2-bromo-2-nitro-1,3-propanediol)	NO	NO	6	NO	NO	8	TRUE	10	1	High		FALSE	149	7.4	YES	YES	TRUE	TRUE	597	742		not classified	not applicable			x	x	6	6	10	10	10	10	10	10	10	6	10	10		OCC(Br)(CO)N(=O)=O	C3H6BrNO4	199.99	-0.64	8.625	-9.265	0.0045
67762-53-2	carboxylic acids, c5-9, tetraesters with pentaerythritol;fatty acids, c5-9, tetraesters with pentaerythritol;fatty acids, c5-9, tetraesters with 2,2-bis(hydroxymethyl)1,3-propanediol;carboxylic acids, c5-9, tetraesters with pentaerythritol fatty acids, c5-9, tetraesters with pentaerythritol fatty acids, c5-9, tetraesters with 2,2-bis(hydroxymethyl)1,3-propanediol	NO	NO	6	NO	NO	8	TRUE	10	1	High		FALSE	149	7.4	YES	YES	TRUE	TRUE	597	742		not classified	not applicable		x	x		10	6	6	6	6	6	10	10	3	10	3	10		CCCCCCCOCC(COCCCCCCC)(COCCCCCCC)COCCCCCCC	C33H68O4	528.86	11.41	12	-0.59	116
67763-18-2	diiso-stearyl malate;butanedioic acid, hydroxy-, bis(16-methylheptadecyl) ester;bis(16-methylheptadecyl) malate;bis(16-methylheptadecyl) 2-hydroxybutanedioate	NO	NO	6	NO	NO	8	TRUE	10	1	High		FALSE	149	7.4	YES	YES	TRUE	TRUE	597	742		not classified	not applicable			x		6	6	3	6	3	6	10	10	1	10	3	10		CC(C)CCCCCCCCCCCCCCCOC(=O)CC(O)C(=O)OCCCCCCCCCCCCCCCC(C)C	C40H78O5	639.01	12	12	0	13.7
112-84-5	13-docosenamide, (13z)-;13-decosenamide (cis);13-docosenamide, (z)-;(z)-docos-13-enamide;(13z)-docos-13-enamide;erucamide;erucyl amide;13-docosenamide, (13z)- 13-decosenamide (cis) 13-docosenamide, (z)- (z)-docos-13-enamide (13z)-docos-13-enamide erucamide erucyl amide	NO	NO	8	NO	NO	6	TRUE	10	1	High		FALSE	149	7.4	YES	YES	TRUE	TRUE	597	742		not classified	not applicable		x	x	x	10	10	10	10	10	10	6	6	6	10	6	10		CCCCCCCCC=CCCCCCCCCCCCC(N)=O	C22H43NO	337.57	8.44	12	-3.56	3.23
67701-27-3	glycerides, c14-18	NO	NO	8	NO	NO	6	TRUE	10	1	High		FALSE	149	7.4	YES	YES	TRUE	TRUE	597	742		not classified	not applicable		x	x		10	6	6	6	6	6	10	10	3	10	3	10		CCCCCCCCCCCCCCCCCC(=O)OC(COC(=O)CCCCCCCCCCCCC)COC(=O)CCCCCCCCCCCCCCC	C51H98O6	807.28	12	12	0	187
68002-71-1	glycerides, c16-18	NO	NO	8	NO	NO	6	TRUE	10	1	High		FALSE	149	7.4	YES	YES	TRUE	TRUE	597	742		not classified	not applicable		x	x		10	6	6	6	6	6	10	10	3	10	3	10		CCCCCCCCCCCCCCCCCC(=O)OCC(COC(=O)CCCCCCCCCCCCCCC)OC(=O)CCCCCCCCCCCCCCCC	C54H104O6	849.36	12	12	0	490
68002-79-9	fatty acids, c14-18 and c16-18 unsatd., triesters with trimethylolpropane;fatty acids, c14-18 and c16-18-unsatd., triesters with trimethylolpropane;fatty acids, c14-18 and c16-18-unsatd, triesters with trimethylolpropane;fatty acids, c14-18 and c16-18 unsatd., triesters with trimethylolpropane fatty acids, c14-18 and c16-18-unsatd., triesters with trimethylolpropane fatty acids, c14-18 and c16-18…	NO	NO	8	NO	NO	6	TRUE	10	1	High		FALSE	149	7.4	YES	YES	TRUE	TRUE	597	742		not classified	not applicable		x	x		10	10	6	6	6	6	10	10	3	10	3	10		CCCCCCCCCCCCCCCC(=O)OCC(CC)(COC(=O)CCCCCCCCCCCCC)COC(=O)CCCCCCCC=CCCCCCCCC	C54H102O6	847.34	12	12	0	760
371-40-4	4-fluoroaniline;4-fluoro-phenylamine;4-fluoro-aniline;p-fluoroaniline;benzenamine, 4-fluoro-;aniline, p-fluoro-;aniline, p-fluoro- (8ci);4-fluoroaniline 4-fluoro-phenylamine 4-fluoro-aniline p-fluoroaniline benzenamine, 4-fluoro- aniline, p-fluoro- aniline, p-fluoro- (8ci)	YES (Step 1)	NO	1.25	NO	NO	10	TRUE	6	10	High		TRUE	148.5	24.25	YES	YES	TRUE	TRUE	623	299		JOINT	STOT RE					3	3	3	3	3	3	3	3	6	3	6	3		Nc1ccc(F)cc1	C6H6FN	111.11	1.15	5.192	-4.042	0.143
57-14-7	1,1-dimethylhydrazine;n,n-dimethyl-hydrazine;dimazine;n,n-dimethylhydrazine;hydrazine, 1,1-dimethyl-;dimethyl hydrazine;1,1-dimethylhydrazine (dimethyl hydrazine) (dmh);1,1-dimethylhydrazine n,n-dimethyl-hydrazine dimazine n,n-dimethylhydrazine hydrazine, 1,1-dimethyl- dimethyl hydrazine 1,1-dimethylhydrazine (dimethyl hydrazine) (dmh)	YES (Step 1)	NO	1.25	NO	NO	10	TRUE	6	10	High		TRUE	148.5	24.25	YES	YES	TRUE	TRUE	623	299		HARMON	CARC					1	1	3	3	3	3	3	3	6	3	6	3		CN(C)N	C2H8N2	60.097	-1.19	4.356	-5.546	0.0271
732-26-3	2,4,6-tri-tert-butylphenol;2,4,6-tri(tert-butyl)phenol;phenol, 2,4,6-tris(1,1-dimethylethyl)-;2,4,6-tri-t-butylphenol;2,4,6-tri-tert-butyl-phenol;2,4,6-tris(1,1-dimethylethyl)phenol;phenol, 2,4,6-tri-tert-butyl-;2,4,6-tris(tert-butyl)phenol (phenol, 2,4,6-tris(1,1-dimethylethyl)-) (2,4,6-tri-tert-butylphenol);phenol, 2,4,6-tri-tert-butyl- (6ci,7ci,8ci);2,4,6-tri-tert-butylphenol 2,4,6-tri(tert-bu…	YES (Step 1)	NO	1.25	NO	NO	10	TRUE	6	10	High		TRUE	148.5	24.25	YES	YES	TRUE	TRUE	623	299		JOINT	STOT RE					6	6	6	6	6	6	6	6	6	6	6	6		CC(C)(C)c1cc(C(C)(C)C)cc(C(C)(C)C)c1O	C18H30O	262.42	6.06	9.464	-3.404	3.94
87-62-7	2,6-dimethylaniline;2,6-xylidine;2,6-dimethyl-phenylamine;2,6-dimethyl-aniline;benzenamine, 2,6-dimethyl-;2,6-dimethylaniline (2,6-xylidine);2,6-dimethylbenzenamine;2,6-dimethylaniline 2,6-xylidine 2,6-dimethyl-phenylamine 2,6-dimethyl-aniline benzenamine, 2,6-dimethyl- 2,6-dimethylaniline (2,6-xylidine) 2,6-dimethylbenzenamine	YES (Step 1)	NO	1.25	NO	NO	10	TRUE	6	10	High		TRUE	148.5	24.25	YES	YES	TRUE	TRUE	623	299		HARMON	CARC					3	3	3	3	3	3	3	3	6	3	6	3		Cc1cccc(C)c1N	C8H11N	121.17	1.84	5.827	-3.987	0.0959
89-62-3	benzenamine, 4-methyl-2-nitro-;4-methyl-2-nitroaniline;2-nitro-p-toluidine;4-methyl-2-nitro-benzenamine;p-toluidine, 2-nitro-;benzenamine, 4-methyl-2-nitro- ;4-methyl-2-nitrobenzenamine;2-nitro-4-methylaniline;benzenamine, 4-methyl-2-nitro- 4-methyl-2-nitroaniline 2-nitro-p-toluidine 4-methyl-2-nitro-benzenamine p-toluidine, 2-nitro- benzenamine, 4-methyl-2-nitro- 4-methyl-2-nitrobenzenamine 2-ni…	YES (Step 1)	NO	1.25	NO	NO	10	TRUE	6	10	High		TRUE	148.5	24.25	YES	YES	TRUE	TRUE	623	299		JOINT	STOT RE					6	6	6	3	3	6	3	3	6	3	6	3		Cc1ccc(N)c(N(=O)=O)c1	C7H8N2O2	152.15	2.57	7.701	-5.131	0.103
99-99-0	benzene, 1-methyl-4-nitro-;4-nitrotoluene;p-nitrotoluene;para-nitrotoluene;1-methyl-4-nitrobenzene;toluene, p-nitro-;4-nitrotoluene (benzene, 1-methyl-4-nitro-);4-methylnitrobenzene;4-nitrotoulene;benzene, 1-methyl-4-nitro- 4-nitrotoluene p-nitrotoluene para-nitrotoluene 1-methyl-4-nitrobenzene toluene, p-nitro- 4-nitrotoluene (benzene, 1-methyl-4-nitro-) 4-methylnitrobenzene 4-nitrotoulene	YES (Step 1)	NO	1.25	NO	NO	10	TRUE	6	10	High		TRUE	148.5	24.25	YES	YES	TRUE	TRUE	623	299		HARMON	STOT RE					3	3	3	3	3	3	3	3	6	3	6	3		Cc1ccc(N(=O)=O)cc1	C7H7NO2	137.13	2.37	6.008	-3.638	0.352
95-64-7	3,4-dimethylaniline (3,4-xylidine);dimethylaniline, 3,4-;3,4-dimethylaniline;benzenamine, 3,4-dimethyl-;3,4-xylidine;3,4-dimethyl-phenylamine;3,4-dimethyl-aniline;3,4-dimethylbenzenamine;3,4-dimethylaniline (3,4-xylidine) dimethylaniline, 3,4- 3,4-dimethylaniline benzenamine, 3,4-dimethyl- 3,4-xylidine 3,4-dimethyl-phenylamine 3,4-dimethyl-aniline 3,4-dimethylbenzenamine	YES (Step 1)	NO	1.125	NO	NO	10	TRUE	6	10	High		TRUE	147.25	23.625	YES	YES	TRUE	TRUE	629	305		JOINT	STOT RE					3	3	3	3	3	3	3	3	6	3	6	3		Cc1ccc(N)cc1C	C8H11N	121.17	1.84	5.959	-4.119	0.0959
110-05-4	di-tert-butyl peroxide;peroxide, bis(1,1-dimethylethyl);t-butyl-peroxide;di-t-butyl peroxide;tert-butyl peroxide (t-buooh);2,2'-dioxybis(2-methylpropane);tert-butyl peroxide;t-buooh;luperox di;di-tert-butyl peroxide peroxide, bis(1,1-dimethylethyl) t-butyl-peroxide di-t-butyl peroxide tert-butyl peroxide (t-buooh) 2,2'-dioxybis(2-methylpropane) tert-butyl peroxide t-buooh luperox di	NO	NO	3.75	NO	NO	10	TRUE	3	10	High		FALSE	146.5	23.25	YES	YES	TRUE	TRUE	630	306		HARMON	MUTA					1	1	1	1	1	1	3	1	1	1	1	1		CC(C)(C)OOC(C)(C)C	C8H18O2	146.22	3.45	4	-0.55	1.05
628-96-6	ethylene glycol dinitrate;1,2-ethanediol, dinitrate;ethylene dinitrate;ethane-1,2-diyl dinitrate;ethylene nitrate;ethylene glycol, dinitrate;ethylene dinitrate ethylene glycol dinitrate ethanediol dinitrate dinitroglycol dinitroglicol ethylene nitrate ethylenglykoldinitrat glycol (dinitrate de) glycol dinitrate glycoldinitraat glykoldinitrat nitroglycol nitroglykol 1,2-bis(nitrooxy)ethane 1,2-eth…	NO	NO	3.75	NO	NO	10	TRUE	3	10	High		FALSE	146.5	23.25	YES	YES	TRUE	TRUE	630	306		HARMON	STOT RE					3	3	1	1	1	1	1	1	3	1	3	3		O=N(=O)OCCON(=O)=O	C2H4N2O6	152.06	1.16	5.106	-3.946	0.0301
107-21-1	ethylene glycol;1,2-ethanediol;ethane-1,2-diol;glycolethylene glycol;ethanediol;ethylene glycol 1,2-ethanediol ethane-1,2-diol glycolethylene glycol ethanediol	YES (Step 1)	NO	10	NO	NO	1	TRUE	6	10	High		TRUE	146	23	YES	YES	TRUE	TRUE	632	308		JOINT	STOT RE					1	1	3	3	3	1	3	3	6	1	6	3		OCCO	C2H6O2	62.065	-1.36	4.25	-5.61	0.00647
108-95-2	phenol;phenol [jan];phenol, pure;phenol phenol [jan] phenol, pure	YES (Step 1)	NO	10	NO	NO	1	TRUE	6	10	High		TRUE	146	23	YES	YES	TRUE	TRUE	632	308		HARMON	MUTA-STOT RE					3	3	3	3	3	3	3	3	6	3	6	3		Oc1ccccc1	C6H6O	94.106	1.46	6.326	-4.866	0.0315
50-00-0	formaldehyde;formaldehyde [bsi:iso];methanal;formaldehyde (act. 37%);formalin;formaldehyde formaldehyde [bsi:iso] methanal formaldehyde (act. 37%) formalin	YES (Step 1)	NO	10	NO	NO	1	TRUE	6	10	High		TRUE	146	23	YES	YES	TRUE	TRUE	632	308		HARMON	CARC-MUTA					3	3	3	3	3	3	3	3	6	3	6	3		C=O	CH2O	30.025	0.35	5.211	-4.861	0.055
64742-80-9	distillates (petroleum), hydrodesulfurized middle;distillates, petroleum, hydrodesulfurized middle;distillates(petroleum),hydrodesulfurisedmiddle,exceptifthefullrefininghistoryis knownanditcanbeshownthatthesubstance fromwhichitis producedisnotacarcinogen;distillates (petroleum), hydrodesulfurized middle distillates, petroleum, hydrodesulfurized middle distillates(petroleum),hydrodesulfurisedmiddl…	Excluded (petroleum product)	NO	10	NO	NO	1	TRUE	6	10	High		TRUE	146	23	YES	YES	TRUE	TRUE	632	308		HARMON	CARC					3	1	3	3	3	3	6	6	1	6	1	6		CCCCCCCCCCCCCCCCCCCC	C20H42	282.53	10.16	6.593	3.567	71.8
70592-76-6	distillates (petroleum), intermediate vacuum;distillates, petroleum, intermediate vacuum;distillates(petroleum),intermediatevacuum;distillates (petroleum), intermediate vacuum distillates, petroleum, intermediate vacuum distillates(petroleum),intermediatevacuum	Excluded (petroleum product)	NO	10	NO	NO	1	TRUE	6	10	High		TRUE	146	23	YES	YES	TRUE	TRUE	632	308		HARMON	CARC					3	1	3	3	3	3	6	6	1	6	1	6		CCCCCCCCCCCCCCCCCCCC	C20H42	282.53	10.16	6.593	3.567	71.8
70592-77-7	distillates (petroleum), light vacuum;distillates, petroleum, light vacuum;distillates(petroleum),lightvacuum;distillates (petroleum), light vacuum distillates, petroleum, light vacuum distillates(petroleum),lightvacuum	Excluded (petroleum product)	NO	10	NO	NO	1	TRUE	6	10	High		TRUE	146	23	YES	YES	TRUE	TRUE	632	308		HARMON	CARC					3	3	6	6	6	6	6	6	1	6	1	6		CCCCCCCCCCCCCCCC	C16H34	226.43	8.2	6.914	1.286	19.9
1047-16-1	5,12-dihydroquino[2,3-b]acridine-7,14-dione	NO	NO	4.5	NO	NO	10	TRUE	10	1	High		FALSE	146	7.25	YES	YES	TRUE	TRUE	632	757		not classified	not applicable		x	x	x	10	10	10	10	10	10	6	6	10	3	10	6		Oc1c2ccccc2nc2cc3c(cc12)nc1ccccc1c3O	C20H12N2O2	312.31	3.68	12	-8.32	0.00373
136210-30-5	aspartic acid, n,n'-(methylenedi-4,1-cyclohexanediyl)bis-, tetraethyl ester;desmophen pac xp 7053;aspartic acid, n,n'-(methylenedi-4,1-cyclohexanediyl)bis-, 1,1',4,4'-tetraethyl ester;tetraethyl n,n'-(methylenedicyclohexane-4,1-diyl)bis-dl-aspartate;desmophen vp ls 2109;zwi 578;aspartic acid, n,n'-(methylenedi-4,1-cyclohexanediyl)bis-, tetraethyl ester desmophen pac xp 7053 aspartic acid, n,n'-(m…	NO	NO	4.5	NO	NO	10	TRUE	10	1	High		FALSE	146	7.25	YES	YES	TRUE	TRUE	632	757		not classified	not applicable		x	x	x	6	10	10	10	6	10	6	6	10	3	10	3		CCOC(=O)CC(C(=O)OCC)NC1CCC(CC2CCC(NC(CC(=O)OCC)C(=O)OCC)CC2)CC1	C29H50N2O8	554.69	5.16	12	-6.84	0.00966
143-29-3	5,8,11,13,16,19-hexaoxatricosane;bis(2-(2-butoxyethoxy)ethoxy)methane;methane, bis(2-(2-butoxyethoxy)ethoxy)-;5,8,11,13,16,19-hexaoxatricosane bis(2-(2-butoxyethoxy)ethoxy)methane methane, bis(2-(2-butoxyethoxy)ethoxy)-	NO	NO	4.5	NO	NO	10	TRUE	10	1	High		FALSE	146	7.25	YES	YES	TRUE	TRUE	632	757		not classified	not applicable		x	x	x	10	10	10	10	10	10	10	10	10	10	10	10		CCCCOCCOCCOCOCCOCCOCCCC	C17H36O6	336.45	1.65	10.832	-9.182	0.0962
35948-25-5	6h-dibenz[c,e][1,2]oxaphosphorin 6-oxide;6h-dibenzo[c,e][1,2]oxaphosphinine 6-oxide;6h-dibenz[c,e][1,2]oxaphosphorin, 6-oxide;6h-dibenzХc,eеХ1,2еoxaphosphorin, 6-oxide;9,10-dihydro-9-oxa-10-phospaphenanthrene-10-oxide(dopo);6h-dibenz[c,e][1,2]oxaphosphorin 6-oxide 6h-dibenzo[c,e][1,2]oxaphosphinine 6-oxide 6h-dibenz[c,e][1,2]oxaphosphorin, 6-oxide 6h-dibenzХc,eеХ1,2еoxaphosphorin, 6-oxide 9,10-di…	NO	NO	4.5	NO	NO	10	TRUE	10	1	High		FALSE	146	7.25	YES	YES	TRUE	TRUE	632	757		not classified	not applicable			x		6	6	6	6	6	6	6	6	10	6	10	6		O=P1c2ccccc2-c2ccccc2O1	C12H9O2P	216.16	1.87	7.524	-5.654	0.287
52408-84-1	poly[oxy(methyl-1,2-ethanediyl)], ?,?’,?’’-1,2,3-propanetriyltris[?-[(1-oxo-2-propenyl)oxy]-;poly[oxy(methyl-1,2-ethanediyl)], .alpha.,.alpha.',.alpha.''-1,2,3-propanetriyltris[.omega.1-(1-oxo-2-propenyl)oxy]-;poly[oxy(methyl-1,2-ethanediyl)], .alpha.,.alpha.',.alpha.''-1,2,3-propanetriyltris[.omega.-[(1-oxo-2-propenyl)oxy]-;glycerol, propoxylated, esters with acrylic acid;alpha,alpha',alpha''-1,…	NO	NO	4.5	NO	NO	10	TRUE	10	1	High		FALSE	146	7.25	YES	YES	TRUE	TRUE	632	757		not classified	not applicable		x	x	x	10	10	10	10	10	10	6	6	10	3	10	3		CC(COC(=O)C=C)OCC(C(OC(C)COC(=O)C=C)OC(C)COC(=O)C=C)OC(C)COC(=O)C=C	C27H40O12	556.57	2.33	12	-9.67	6.34e-05
80-09-1	phenol, 4,4'-sulfonylbis-;bisphenol s;4,4'-sulfonyldiphenol;bis(4-hydroxyphenyl)sulphone;phenol, 4,4’-sulfonylbis-;4,4'-sulphonyldiphenol;phenol, 4,4'-sulfonyldi-;4,4'-sulfonylbisphenol;phenol, 4,4'-sulfonylbis- bisphenol s 4,4'-sulfonyldiphenol bis(4-hydroxyphenyl)sulphone phenol, 4,4’-sulfonylbis- 4,4'-sulphonyldiphenol phenol, 4,4'-sulfonyldi- 4,4'-sulfonylbisphenol	NO	NO	4.5	NO	NO	10	TRUE	10	1	High		FALSE	146	7.25	YES	YES	TRUE	TRUE	632	757		not classified	not applicable		x	x	x	10	10	10	10	10	10	10	10	10	10	10	10		Oc1ccc(S(=O)(=O)c2ccc(O)cc2)cc1	C12H10O4S	250.26	1.65	12	-10.35	0.0454
9051-49-4	poly[oxy(methyl-1,2-ethanediyl)], ?-hydro-?-hydroxy-, ether with 2,2-bis(hydroxymethyl)-1,3-propanediol (4:1);poly[oxy(methyl-1,2-ethanediyl)], .alpha.-hydro-.omega.-hydroxy-, ether with 2,2-bis(hydroxymethyl)-1,3-propanediol (4:1);pentaerythritol, propoxylated;poly[oxy(methyl-1,2-ethanediyl)], .alpha.-hydro-.omega.-hydroxy-, ether with 2,2-bis(hydroxymethyl)-1,3-propanediol (4:1);2,2-bis(hydroxy…	NO	NO	4.5	NO	NO	10	TRUE	10	1	High		FALSE	146	7.25	YES	YES	TRUE	TRUE	632	757		not classified	not applicable		x	x	x	10	10	10	10	10	10	10	10	10	10	10	10		CC(CO)OCC(C)OCC(C)OCC(COCC(C)OCC(C)OCC(C)O)(COCC(C)OCC(C)OCC(C)O)COC(C)COC(C)COC(C)CO	C41H84O16	833.06	-1.05	12	-13.05	0.00028
23588-51-4	2,2-dimethyl-3-(morpholin-4-yl)propanal;aldehyd m;2,2-dimethyl-3-morpholin-4-yl-propionaldehyde;aldehyde m;2,2-dimethyl-3-(morpholin-4-yl)propanal aldehyd m 2,2-dimethyl-3-morpholin-4-yl-propionaldehyde aldehyde m	NO	NO	7.5	YES	NO	6	TRUE	10	1	High		FALSE	146	7.25	YES	YES	TRUE	TRUE	632	757		not classified	not applicable			x	x	6	6	6	6	10	6	6	6	10	6	10	6		CC(C)(CN1CCOCC1)C=O	C9H17NO2	171.23	0.02	7.677	-7.657	0.0117
111-46-6	2-hydroxyethyl ether;diethylene glycol;ethanol, 2,2'-oxybis-;dihydroxyethylether (diethylene glycol);2,2'-oxybisethanol;ethanol, 2,2’-oxybis-;2,2'-oxydiethanol;diethylene glycol (ethanol, 2,2'-oxybis-) (2-hydroxyethyl ether);2-hydroxyethyl ether diethylene glycol ethanol, 2,2'-oxybis- dihydroxyethylether (diethylene glycol) 2,2'-oxybisethanol ethanol, 2,2’-oxybis- 2,2'-oxydiethanol diethylene gly…	YES (Step 1)	NO	9	NO	NO	1	TRUE	6	10	High		TRUE	145	22.5	YES	YES	TRUE	TRUE	646	314		JOINT	STOT RE					3	3	6	6	6	3	3	3	6	3	6	3		OCCOCCO	C4H10O3	106.12	-1.47	5.611	-7.081	0.00488
64742-61-6	slack wax (petroleum);slack wax, petroleum;slackwax(petroleum),exceptifthefull refininghistoryisknownanditcanbeshownthatthesubstancefromwhichitis producedisnotacarcinogen;slack wax (petroleum) slack wax, petroleum slackwax(petroleum),exceptifthefull refininghistoryisknownanditcanbeshownthatthesubstancefromwhichitis producedisnotacarcinogen	Excluded (petroleum product)	NO	9	NO	NO	1	TRUE	6	10	High		TRUE	145	22.5	YES	YES	TRUE	TRUE	646	314		HARMON	CARC					3	1	3	3	3	3	6	6	1	6	1	6		CCCCCCCCCC(CCCCC)CCCCCC	C21H44	296.56	10.58	6.889	3.691	103
90669-78-6	slack wax (petroleum), clay-treated;slackwax(petroleum),claytreated,exceptif thefullrefininghistoryisknownanditcanbe shownthatthe substance fromwhichitis producedisnotacarcinogen;slack wax (petroleum), clay-treated slackwax(petroleum),claytreated,exceptif thefullrefininghistoryisknownanditcanbe shownthatthe substance fromwhichitis producedisnotacarcinogen	Excluded (petroleum product)	NO	9	NO	NO	1	TRUE	6	10	High		TRUE	145	22.5	YES	YES	TRUE	TRUE	646	314		HARMON	CARC					3	1	3	3	3	3	6	6	1	6	1	6		CCCCCCCCCCCCCCCCCCCCCC	C22H46	310.58	11.15	7.337	3.813	136
85535-84-8	alkanes, c10-13, chloro;alkanes, c10-13, chloro-;alkanes,c1013,monochloro;lkanes, c10-13, chloro;alkanes, c10-c13, chloro;short chain chlorinated paraffins;alkanes, c10-13, chloro alkanes, c10-13, chloro- alkanes,c1013,monochloro lkanes, c10-13, chloro alkanes, c10-c13, chloro short chain chlorinated paraffins	NO	NO	3.5	NO	NO	10	TRUE	3	10	High		FALSE	144	22	YES	YES	TRUE	TRUE	649	317		HARMON	CARC					1	1	3	3	3	3	3	3	1	3	1	1		CCCCCC(Cl)CCCC	C10H21Cl	176.72	5.43	4.797	0.633	3.77
107-22-2	ethanedial;glyoxal;glyoxal (act. 40%);oxalaldehyde;ethane-1,2-dione;glyoxal, 29.2%;glyoxal (40 wt % in h2o);ethanedial glyoxal glyoxal (act. 40%) oxalaldehyde ethane-1,2-dione glyoxal, 29.2% glyoxal (40 wt % in h2o)	YES (Step 1)	NO	8	NO	NO	1	TRUE	6	10	High		TRUE	144	22	YES	YES	TRUE	TRUE	649	317		HARMON	MUTA					3	3	6	6	6	3	3	3	6	3	6	6		O=CC=O	C2H2O2	58.034	-1.66	5.206	-6.866	0.0199
127-19-5	dimethylacetamide;acetamide, n,n-dimethyl-;n,n'-dimethylacetamide;n,n-dimethylacetamide;n,ndimethylacetamide;n,n-dimethyl acetamide;dimethyl acetamide;n,n-dimethylacetamide (dimethylacetamide) (acetamide, n,n-dimethyl-);dimethylacetamide acetamide, n,n-dimethyl- n,n'-dimethylacetamide n,n-dimethylacetamide n,ndimethylacetamide n,n-dimethyl acetamide dimethyl acetamide n,n-dimethylacetamide (dimet…	YES (Step 1)	NO	8	NO	NO	1	TRUE	6	10	High		TRUE	144	22	YES	YES	TRUE	TRUE	649	317		HARMON	REPR					3	3	3	3	6	3	3	3	6	3	6	3		CC(=O)N(C)C	C4H9NO	87.117	-0.77	5.501	-6.271	0.0139
26761-45-5	neodecanoic acid, oxiranylmethyl ester;oxiran-2-ylmethyl 2,2-dimethyloctanoate;neodecanoic acid, oxiranylmethyl ester oxiran-2-ylmethyl 2,2-dimethyloctanoate	YES (Step 1)	NO	8	NO	NO	1	TRUE	6	10	High		TRUE	144	22	YES	YES	TRUE	TRUE	649	317		JOINT	MUTA					3	3	3	3	3	3	3	3	6	3	6	3		CCCCCCC(C)(C)C(=O)OCC1CO1	C13H24O3	228.32	3.73	7.554	-3.824	0.0923
64741-50-0	distillates (petroleum), light paraffinic;distillates, petroleum, light paraffinic;distillates(petroleum),light paraffinic;distillates (petroleum), light paraffinic distillates, petroleum, light paraffinic distillates(petroleum),light paraffinic	Excluded (petroleum product)	NO	8	NO	NO	1	TRUE	6	10	High		TRUE	144	22	YES	YES	TRUE	TRUE	649	317		HARMON	CARC					3	1	3	3	3	3	6	6	1	6	1	6		CCCCCCCCCCCCCCCCCCCC	C20H42	282.53	10.16	6.593	3.567	71.8
68-12-2	formamide, n,n-dimethyl-;dimethylformamide;n,n'-dimethylformamide;n,n-dimethylformamide;dimethylformamide (dmf);dimethyl formamide;dimethylformamide(n,ndimethylformamide);n,n-dimethylformamide (dimethylformamide) (dmf);formamide, n,n-dimethyl- dimethylformamide n,n'-dimethylformamide n,n-dimethylformamide dimethylformamide (dmf) dimethyl formamide dimethylformamide(n,ndimethylformamide) n,n-dimet…	YES (Step 1)	NO	8	NO	NO	1	TRUE	6	10	High		TRUE	144	22	YES	YES	TRUE	TRUE	649	317		HARMON	REPR					1	1	3	3	3	3	3	3	6	1	6	3		CN(C)C=O	C3H7NO	73.091	-1.01	4.51	-5.52	0.00725
872-50-4	methylpyrrolidone, n-;n-methyl-2-pyrrolidinone;2-pyrrolidinone, 1-methyl-;n-methyl-2-pyrrolidone;n-methylpyrrolidone;1-methyl-2-pyrrolidone;1-methylpyrrolidin-2-one;(99.5);1-methyl-2-pyrrolidinone;n-methyl-2-pyrrolidone (2-pyrrolidinone, 1-methyl-);methylpyrrolidone, n- n-methyl-2-pyrrolidinone 2-pyrrolidinone, 1-methyl- n-methyl-2-pyrrolidone n-methylpyrrolidone 1-methyl-2-pyrrolidone 1-methylpy…	YES (Step 1)	NO	8	NO	NO	1	TRUE	6	10	High		TRUE	144	22	YES	YES	TRUE	TRUE	649	317		HARMON	REPR					3	3	6	6	6	6	3	3	6	3	6	6		CN1CCCC1=O	C5H9NO	99.127	-0.38	6.503	-6.883	0.0107
98-00-0	furfurylalcohol;furfuryl alcohol;2-furanmethanol;2-hydroxymethylfuran;2-furylmethanol;furfural alcohol;furfuryl alcohol (2-furanmethanol);furfurylalcohol furfuryl alcohol 2-furanmethanol 2-hydroxymethylfuran 2-furylmethanol furfural alcohol furfuryl alcohol (2-furanmethanol)	YES (Step 1)	NO	8	NO	NO	1	TRUE	6	10	High		TRUE	144	22	YES	YES	TRUE	TRUE	649	317		HARMON	CARC-STOT RE					3	3	3	3	3	3	3	3	6	3	6	3		OCC1=CC=CO1	C5H6O2	98.095	0.28	5.773	-5.493	0.0219
527-60-6	2,4,6-trimethylphenol;trimethylphenol, 2,4,6-;phenol, 2,4,6-trimethyl-;2,4,6-trimethyl-phenol;2,3,6-trimethyl-phenol;mesitol;phenol, 2,4,6-teimethyl-	YES (Step 1)	NO	1.25	NO	NO	6	TRUE	6	10	High		TRUE	143.5	21.75	YES	YES	TRUE	TRUE	657	325		JOINT	STOT RE					3	3	3	3	3	3	3	3	6	3	6	3		Cc1cc(C)cc(C)c1O	C9H12O	136.18	2.73	6.703	-3.973	0.0721
106-91-2	glycidyl methacrylate;2-propenoic acid, 2-methyl-, 2-oxiranylmethyl ester;2,3-epoxypropyl methacrylate;2-propenoic acid, 2-methyl-, oxiranylmethyl ester;oxiran-2-ylmethyl methacrylate;2-propenoic acid, 2-methyl-, oxiranylmethyl estervan;methacrylic acid, 2,3-epoxypropyl ester;oxiran-2-ylmethyl 2-methylprop-2-enoate;2,3-epoxy-1-propanol methacrylate;2,3-epoxypropyl ester methacrylic acid;glycidyl-…	YES (Step 1)	NO	7	NO	NO	1	TRUE	6	10	High		TRUE	143	21.5	YES	YES	TRUE	TRUE	658	326		INDIV	CARC-MUTA-REPR-STOT RE					3	3	3	3	3	3	3	3	6	3	6	3		CC(=C)C(=O)OCC1CO1	C7H10O3	142.15	0.81	5.702	-4.892	0.0138
109-86-4	methyl cellosolve;2-methoxyethanol;ethanol, 2-methoxy-;2-methoxy-ethanol;ethyl glycol monomethyl ether;methoxyethanol;2methoxyethanolanditsacetate (2methoxyethylacetate);methyl glycol ether;ethylene glycol methyl ether;ethylene glycol monomethyl ether;egme;1-hydroxy-2-methoxyethane;2-methoxy-1-ethanol;methoxyhydroxyethane;methyl ethoxol;methyl oxitol;monomethyl glycol;2-methoxyethanol (ethylene g…	YES (Step 1)	NO	7	NO	NO	1	TRUE	6	10	High		TRUE	143	21.5	YES	YES	TRUE	TRUE	658	326		HARMON	REPR					1	1	1	3	3	1	1	3	6	3	3	3		COCCO	C3H8O2	76.091	-0.77	4.1	-4.87	0.0174
150-76-5	4-methoxyphenol;methoxyhydroquinone;methoxyphenol, 4 -;phenol, 4-methoxy-;4-methoxy-phenol;p-methoxy-phenol;p-methoxyphenol;p-hydroxyanisole;mequinol;phenol, p-methoxy-;mehq;4-methoxyphenol (hydroquinone monomethyl ether) (p-methoxyphenol);4-methoxyphenol methoxyhydroquinone methoxyphenol, 4 - phenol, 4-methoxy- 4-methoxy-phenol p-methoxy-phenol p-methoxyphenol p-hydroxyanisole mequinol phenol, p…	YES (Step 1)	NO	7	NO	NO	1	TRUE	6	10	High		TRUE	143	21.5	YES	YES	TRUE	TRUE	658	326		JOINT	REPR					6	6	6	6	6	6	3	6	6	6	6	6		COc1ccc(O)cc1	C7H8O2	124.13	1.58	7.447	-5.867	0.0935
2687-91-4	2-pyrrolidinone, 1-ethyl-;1-ethylpyrrolidin-2-one;2-pyrrolidinone, 1-ethyl- 1-ethylpyrrolidin-2-one	YES (Step 1)	NO	7	NO	NO	1	TRUE	6	10	High		TRUE	143	21.5	YES	YES	TRUE	TRUE	658	326		HARMON	REPR					3	3	3	3	3	3	3	3	6	3	6	3		CCN1CCCC1=O	C6H11NO	113.15	-0.04	5.726	-5.766	0.0133
288-88-0	1h-[1,2,4]triazole;1h-1,2,4-triazole;1,2,4-triazole;1,2,4triazole;1-h-1,2,4-triazole;4h-[1,2,4]triazole;1h-[1,2,4]triazole 1h-1,2,4-triazole 1,2,4-triazole 1,2,4triazole 1-h-1,2,4-triazole 4h-[1,2,4]triazole	YES (Step 1)	NO	7	NO	NO	1	TRUE	6	10	High		TRUE	143	21.5	YES	YES	TRUE	TRUE	658	326		HARMON	REPR					1	1	3	3	3	3	3	3	6	3	6	3		C1NC=NN=1	C2H3N3	69.065	-0.58	4	-4.58	0.0918
60-24-2	2-mercaptoethanol;2-mercapto-ethanol;ethanol, 2-mercapto-;b-mercaptoethanol;2-sulfanylethanol;beta-mercaptoethanol;bme;2-hydroxyethyl mercaptan;thioglycol;2-mercaptoethanol 2-mercapto-ethanol ethanol, 2-mercapto- b-mercaptoethanol 2-sulfanylethanol beta-mercaptoethanol bme 2-hydroxyethyl mercaptan thioglycol	YES (Step 1)	NO	7	NO	NO	1	TRUE	6	10	High		TRUE	143	21.5	YES	YES	TRUE	TRUE	658	326		JOINT	STOT RE					3	3	3	3	3	3	3	3	6	3	6	3		OCCS	C2H6OS	78.13	-0.2	4.933	-5.133	0.0154
6117-80-2	2-butene-1,4-diol (cis);(z)-2-butene-1,4-diol;(2z)-but-2-ene-1,4-diol;2-butene-1,4-diol, (z)-;2-butene-1,4-diol (cis) (z)-2-butene-1,4-diol (2z)-but-2-ene-1,4-diol 2-butene-1,4-diol, (z)-	YES (Step 1)	NO	7	NO	NO	1	TRUE	6	10	High		TRUE	143	21.5	YES	YES	TRUE	TRUE	658	326		JOINT	STOT RE					1	1	3	3	3	1	3	3	6	3	6	3		OCC=CCO	C4H8O2	88.101	-0.81	4.271	-5.081	0.0129
84-74-2	1,2-benzenedicarboxylic acid, dibutyl ester;di-n-butylorthophthalate;di-n-butyl phthalate;phthalic acid, di-n-butylester;dibutyl phthalate (dbp);1,2-benzenedicarboxylic acid, 1,2-dibutyl ester;dibutyl phthalate;di-n-butyl phthalate (dbup);dibutylphthatlate (dbp);phthalic acid, dibutyl ester;dbp;dibutylphthalate;dibutyl-phtalate;1,2-benzenedicarboxylic acid, dibutyl ester di-n-butylorthophthalate …	YES (Step 1)	NO	7	NO	NO	1	TRUE	6	10	High		TRUE	143	21.5	YES	YES	TRUE	TRUE	658	326		HARMON	REPR					6	6	3	3	3	3	3	3	6	3	6	3		CCCCOC(=O)c1ccccc1C(=O)OCCCC	C16H22O4	278.33	4.5	8.631	-4.131	0.0896
85-68-7	butylbenzylphthalate;butyl benzyl phthalate;phthalic acid, benzylbutylester;benzyl butyl phthalate;1,2-benzenedicarboxylic acid, 1-butyl 2-(phenylmethyl) ester;1,2-benzenedicarboxylic acid, butyl phenylmethyl ester;benzyl butyl phthalate (bbp);phthalic acid, benzyl butyl ester;phthalic acid, benzyl butyl ester ;butyl;butylbenzyl phthalate;butyl-benzyl phthalate;butyl benzyl phthalate (1,2-benzene…	YES (Step 1)	NO	7	NO	NO	1	TRUE	6	10	High		TRUE	143	21.5	YES	YES	TRUE	TRUE	658	326		HARMON	REPR					6	6	3	3	3	3	3	3	6	3	6	3		CCCCOC(=O)c1ccccc1C(=O)OCc1ccccc1	C19H20O4	312.34	4.73	9.018	-4.288	0.0354
88-12-0	n-vinylpyrrolidone-2;n-vinyl-2-pyrrolidinone;2-pyrrolidinone, 1-ethenyl-;1-vinyl-2-pyrrolidone;1-vinylpyrrolidin-2-one;1vinyl2pyrrolidone;2-pyrrolidinone, 1-vinyl-;1-vinyl-2-pyrrolidinone;1-vinyl-2-pyrrolidinone, monomer;1-vinylpyrrolidinone;1-vinylpyrrolidone;n-vinyl-2-pyrrolidone;n-vinylpyrrolidinone;n-vinylpyrrolidone;v-pyrol;vinyl-2-pyrrolidone;vinylbutyrolactam;vinylpyrrolidinone;vinylpyrrol…	YES (Step 1)	NO	7	NO	NO	1	TRUE	6	10	High		TRUE	143	21.5	YES	YES	TRUE	TRUE	658	326		HARMON	CARC-STOT RE					3	3	3	3	3	3	3	3	6	3	6	3		C=CN1CCCC1=O	C6H9NO	111.14	0.37	6.016	-5.646	0.0191
91-64-5	2h-1-benzopyran-2-one;coumarin;2h-chromen-2-one;coumarin ;coumarin (2h-1-benzopyran-2-one) (chromen-2-one);2h-1-benzopyran-2-one coumarin 2h-chromen-2-one coumarin coumarin (2h-1-benzopyran-2-one) (chromen-2-one)	YES (Toxicity Score of 10 confirmed)	NO	7	NO	NO	1	TRUE	6	10	Low		TRUE	143	21.5	YES	YES	TRUE	TRUE	658	326		OTH-YES	CARC-STOT RE					3	6	6	6	6	6	3	3	6	6	6	6		O=C1C=Cc2ccccc2O1	C9H6O2	146.14	1.39	6.782	-5.392	0.122
26401-35-4	diisotridecyl adipate;bis(11-methyldodecyl) hexanedioate;hexanedioic acid, diisotridecyl ester;diisotridecyl adipate (dita);diisotridecyl adipate bis(11-methyldodecyl) hexanedioate hexanedioic acid, diisotridecyl ester diisotridecyl adipate (dita)	NO	NO	7	NO	NO	6	TRUE	10	1	High		FALSE	143	7.1	YES	YES	TRUE	TRUE	658	765		not classified	not applicable			x		6	6	3	3	3	3	10	10	1	10	1	10		CC(C)CCCCCCCCCCOC(=O)CCCCC(=O)OCCCCCCCCCCC(C)C	C32H62O4	510.81	12	12	0	6.51
27253-26-5	diisotridecyl phthalate;bis(11-methyldodecyl) benzene-1,2-dicarboxylate;1,2-benzenedicarboxylic acid, diisotridecyl ester (9ci);diisotridecyl phthalate bis(11-methyldodecyl) benzene-1,2-dicarboxylate 1,2-benzenedicarboxylic acid, diisotridecyl ester (9ci)	NO	NO	7	NO	NO	6	TRUE	10	1	High		FALSE	143	7.1	YES	YES	TRUE	TRUE	658	765		not classified	not applicable			x		6	6	3	6	3	6	10	10	1	10	3	10		CC(C)CCCCCCCCCCOC(=O)c1ccccc1C(=O)OCCCCCCCCCCC(C)C	C34H58O4	530.79	12	12	0	24.5
28472-97-1	nonanedioic acid, diisodecyl ester;diisodecyl azelate;bis(8-methylnonyl) nonanedioate;c9-11 branched alcohols , c10 rich diesters with nonanedioic acid;nonanedioic acid, diisodecyl ester diisodecyl azelate bis(8-methylnonyl) nonanedioate c9-11 branched alcohols , c10 rich diesters with nonanedioic acid	NO	NO	7	NO	NO	6	TRUE	10	1	High		FALSE	143	7.1	YES	YES	TRUE	TRUE	658	765		not classified	not applicable			x		6	6	3	3	3	3	6	6	3	10	3	10		CC(C)CCCCCCCOC(=O)CCCCCCCC(=O)OCCCCCCCC(C)C	C29H56O4	468.73	11.55	12	-0.45	2.49
110-88-3	s-trioxane;1,3,5-trioxane;trioxymethylene(1,3,5trioxan);trioxane;[1,3,5]trioxane ;1,3,5-trioxane ;s-trioxane 1,3,5-trioxane trioxymethylene(1,3,5trioxan) trioxane [1,3,5]trioxane 1,3,5-trioxane	YES (Step 1)	NO	6.5	NO	NO	1	TRUE	6	10	High		TRUE	142.5	21.25	YES	YES	TRUE	TRUE	672	337		HARMON	REPR					3	3	3	3	3	3	3	3	6	3	6	3		C1OCOCO1	C3H6O3	90.074	-0.43	4.664	-5.094	0.022
116-14-3	tetrafluoroethylene;ethene, tetrafluoro-;tetrafluoroethene;ethylene, tetrafluoro-;polytef;tetrafluoroethylene ethene, tetrafluoro- tetrafluoroethene ethylene, tetrafluoro- polytef	NO	NO	3.3	NO	NO	10	TRUE	3	10	High		FALSE	142	21	YES	YES	TRUE	TRUE	673	338		IARC	CARC					1	1	1	1	1	1	1	3	3	3	3	3		FC(F)=C(F)F	C2F4	100.01	1.21	4	-2.79	0.482
116-15-4	hexafluoropropene;1-propene, 1,1,2,3,3,3-hexafluoro-;1,1,2,3,3,3-hexafluoroprop-1-ene;propene, hexafluoro-;hexafluoropropene 1-propene, 1,1,2,3,3,3-hexafluoro- 1,1,2,3,3,3-hexafluoroprop-1-ene propene, hexafluoro-	NO	NO	3.3	NO	NO	10	TRUE	3	10	High		FALSE	142	21	YES	YES	TRUE	TRUE	673	338		JOINT	CARC-STOT RE					1	1	1	1	1	1	1	1	3	1	3	1		FC(F)=C(F)C(F)(F)F	C3F6	150.02	2.12	4	-1.88	1.58
16219-75-3	5-ethylidene-2-norbornene;ethylidene norbornene;bicyclo[2.2.1]hept-2-ene, 5-ethylidene-;ethylidenenorbornene;5-ethylidene-8,9,10-trinorborn-2-ene;5-ethylidenebicyclo[2.2.1]hept-2-ene;bicyclo 2.2.1 hept-2-ene, 5-ethylidene-;2-norbornene, 5-ethylidene-;bicycloХ2.2.1еhept-2-ene, 5-ethylidene-;(5e)-5-ethylidenebicyclo[2.2.1]hept-2-ene;enb;5-ethylidene-2-norbornene (ethylidenenorbornene) (bicyclo[2.2.…	NO	NO	3.3	NO	NO	10	TRUE	3	10	High		FALSE	142	21	YES	YES	TRUE	TRUE	673	338		JOINT	STOT RE					1	1	1	1	1	1	3	1	1	1	1	1		CC=C1CC2CC1C=C2	C9H12	120.18	3.82	4	-0.18	5.44
3048-64-4	5-vinyl-2-norbornene;vinylnorbornene;5-vinylnorborn-2-ene;bicyclo[2.2.1]hept-2-ene, 5-ethenyl-;5-ethenylbicyclo[2.2.1]hept-2-ene;bicyclo 2.2.1 hept-2-ene, 5-ethenyl-;2-norbornene, 5-vinyl-;bicycloХ2.2.1еhept-2-ene, 5-ethenyl-;5-vinylbicyclo[2.2.1]hept-2-ene;bicyclo(2.2.1)hept-2-ene, 5-ethenyl-;5-vinyl-2-norbornene vinylnorbornene 5-vinylnorborn-2-ene bicyclo[2.2.1]hept-2-ene, 5-ethenyl- 5-ethenyl…	NO	NO	3.3	NO	NO	10	TRUE	3	10	High		FALSE	142	21	YES	YES	TRUE	TRUE	673	338		JOINT	STOT RE					1	1	1	1	1	1	3	1	1	1	1	1		C=CC1CC2CC1C=C2	C9H12	120.18	3.62	4	-0.38	4.37
105-75-9	dibutyl fumarate;2-butenedioic acid (2e)-, dibutyl ester;dibutyl (2e)-but-2-enedioate;2-butenedioic acid, (e)-, dibutyl ester;dibutyl fumerate;(2e)-2-butenedioic acid 1,4-dibutyl ester;dibutyl but-2-enedioate;dibutyl fumarate 2-butenedioic acid (2e)-, dibutyl ester dibutyl (2e)-but-2-enedioate 2-butenedioic acid, (e)-, dibutyl ester dibutyl fumerate (2e)-2-butenedioic acid 1,4-dibutyl ester dibut…	YES (Step 1)	NO	6	NO	NO	1	TRUE	6	10	High		TRUE	142	21	YES	YES	TRUE	TRUE	673	338		JOINT	STOT RE					6	6	3	3	3	3	3	3	6	3	6	3		CCCCOC(=O)C=CC(=O)OCCCC	C12H20O4	228.27	4.16	8.976	-4.816	0.0344
110-65-6	2-butyn-1,4-diol;but-2-yne-1,4-diol;2-butyne-1,4-diol;bis(hydroxymethyl)acetylene;but-2-in-1,4-diol;2-butin-1,4-diol;1,4-butinodiol;butindiol;2-butynediol;butynediol;butynediol-1,4;1,4-dihydroxy-2-butyne;2-butyn-1,4-diol but-2-yne-1,4-diol 2-butyne-1,4-diol bis(hydroxymethyl)acetylene but-2-in-1,4-diol 2-butin-1,4-diol 1,4-butinodiol butindiol 2-butynediol butynediol butynediol-1,4 1,4-dihydroxy-…	YES (Step 1)	NO	6	NO	NO	1	TRUE	6	10	High		TRUE	142	21	YES	YES	TRUE	TRUE	673	338		HARMON	STOT RE					3	3	3	3	6	3	3	3	6	3	6	3		OCC#CCO	C4H6O2	86.085	-0.93	5.3	-6.23	0.0076
110-80-5	2-ethoxyethanol;ethoxyethanol, 2-;ethanol, 2-ethoxy-;cellosolve;2ethoxyethanolanditsacetate(2ethoxyethylacetate);monoethyleneglycol ethyl ether;ethylene glycol monoethyl ether;eemeg,;ethylglycol;2-ethoxyethanol (ethylene glycol monoethyl ether) (egmee);2-ethoxyethanol ethoxyethanol, 2- ethanol, 2-ethoxy- cellosolve 2ethoxyethanolanditsacetate(2ethoxyethylacetate) monoethyleneglycol ethyl ether et…	YES (Step 1)	NO	6	NO	NO	1	TRUE	6	10	High		TRUE	142	21	YES	YES	TRUE	TRUE	673	338		HARMON	REPR					3	1	3	3	3	1	1	3	6	3	3	3		CCOCCO	C4H10O2	90.117	-0.32	4.396	-4.716	0.0232
111-96-6	bis(2-methoxyethyl) ether;ethane, 1,1'-oxybis[2-methoxy-;2-methoxyethylether;2-methoxyethyl ether;diethylene glycol dimethyl ether;ethane, 1,1’-oxybis[2-methoxy-;1-methoxy-2-(2-methoxyethoxy)ethane;bis(2methoxyethyl)ether (dimethoxydiglycol);ethane, 1,1'-oxybis 2-methoxy-;ether, bis(2-methoxyethyl);ethane, 1,1'-oxybisХ2-methoxy-;bis(2-methoxyethyl)ether;1,1'-oxybis[2-methoxyethane];bis(2-methoxye…	YES (Step 1)	NO	6	NO	NO	1	TRUE	6	10	High		TRUE	142	21	YES	YES	TRUE	TRUE	673	338		HARMON	REPR					3	3	3	3	3	3	3	3	6	3	6	3		COCCOCCOC	C6H14O3	134.17	-0.36	4.31	-4.67	0.0354
151-56-4	ethyleneimine;aziridine;ethylenimine	YES (Step 1)	NO	6	NO	NO	1	TRUE	6	10	High		TRUE	142	21	YES	YES	TRUE	TRUE	673	338		HARMON	CARC-MUTA					1	1	1	1	3	1	1	1	6	3	3	3		C1CN1	C2H5N	43.067	-0.28	4	-4.28	0.0731
2235-00-9	1-vinylhexahydro-2h-azepin-2-one;1-ethenylazepan-2-one;2h-azepin-2-one, 1-ethenylhexahydro-;2h-azepin-2-one, hexahydro-1-vinyl-;1-vinylazepan-2-one;1-vinylhexahydro-2h-azepin-2-one 1-ethenylazepan-2-one 2h-azepin-2-one, 1-ethenylhexahydro- 2h-azepin-2-one, hexahydro-1-vinyl- 1-vinylazepan-2-one	YES (Step 1)	NO	6	NO	NO	1	TRUE	6	10	High		TRUE	142	21	YES	YES	TRUE	TRUE	673	338		JOINT	STOT RE					3	3	3	3	3	3	3	3	6	3	6	3		C=CN1CCCCCC1=O	C8H13NO	139.19	1.23	6.63	-5.4	0.0464
288-32-4	imidazole;1h-imidazole;imidazole:;imidazole (solid);imidazol;imidazole (1h-imidazole);imadazole;imidazole 1h-imidazole imidazole: imidazole (solid) imidazol imidazole (1h-imidazole) imadazole	YES (Step 1)	NO	6	NO	NO	1	TRUE	6	10	High		TRUE	142	21	YES	YES	TRUE	TRUE	673	338		HARMON	REPR					1	1	1	3	3	1	1	3	6	3	3	3		C1=CNC=N1	C3H4N2	68.076	-0.08	4	-4.08	0.116
68814-89-1	extracts (petroleum), heavy paraffinic distillates, solvent-deasphalted;extracts, petroleum, heavy paraffinic distillates, solvent deasphalted;extracts(petroleum),heavy paraffinic distillates,solventdeasphalted,iftheycontain>3%w/wdmsoextract;extracts, petroleum, heavy paraffinic distillates, solvent-deasphalted;extracts (petroleum), heavy paraffinic distillates, solvent-deasphalted extracts, petr…	Excluded (petroleum product)	NO	6	NO	NO	1	TRUE	6	10	High		TRUE	142	21	YES	YES	TRUE	TRUE	673	338		HARMON	CARC					3	1	3	3	3	3	6	6	1	6	1	6		CCCCCCCCCCCCCCCCCCCCCC	C22H46	310.58	11.15	7.337	3.813	136
70969-70-9	2-ethylhexyl 3,5,5-trimethylhexanoate;hexanoic acid, 3,5,5-trimethyl-, 2-ethylhexyl ester	YES (Step 1)	NO	6	NO	NO	1	TRUE	6	10	High		TRUE	142	21	YES	YES	TRUE	TRUE	673	338		JOINT	STOT RE					3	3	6	6	6	6	6	6	1	6	1	6		CCCCC(CC)COC(=O)CC(C)CC(C)(C)C	C17H34O2	270.44	6.99	7.412	-0.422	1.41
75-12-7	formamide	YES (Step 1)	NO	6	NO	NO	1	TRUE	6	10	High		TRUE	142	21	YES	YES	TRUE	TRUE	673	338		HARMON	REPR					3	3	3	3	6	3	3	3	6	3	6	3		NC=O	CH3NO	45.04	-1.51	5.735	-7.245	0.00194
84-69-5	isophthalic acid, di-n-butyl ester;diisobutyl phthalate;1,2-benzenedicarboxylic acid, 1,2-bis(2-methylpropyl) ester;di-l-butyl phthalate (dibp);di-isobutylphthalate;1,2-benzenedicarboxylic acid, bis(2-methylpropyl) ester;bis(2-methylpropyl) benzene-1,2-dicarboxylate;phthalic acid, diisobutyl ester;diisobutyl phthalate (di-l-butyl phthalate) (dibp);isophthalic acid, di-n-butyl ester diisobutyl pht…	YES (Step 1)	NO	6	NO	NO	1	TRUE	6	10	High		TRUE	142	21	YES	YES	TRUE	TRUE	673	338		HARMON	REPR					6	6	3	3	3	3	3	3	6	3	6	3		CC(C)COC(=O)c1ccccc1C(=O)OCC(C)C	C16H22O4	278.33	4.11	8.412	-4.302	0.0596
13162-05-5	n-vinylformamide;n-ethenylformamide;formamide, n-ethenyl-;formamide, n-vinyl-;n-vinylformamide n-ethenylformamide formamide, n-ethenyl- formamide, n-vinyl-	YES (Step 1)	NO	5.3	YES	NO	1	TRUE	6	10	High		TRUE	141.3	20.65	YES	YES	TRUE	TRUE	688	353		JOINT	REPR-STOT RE					3	3	3	3	3	3	3	3	6	3	6	3		C=CNC=O	C3H5NO	71.076	0.28	5.898	-5.618	0.0117
79-16-3	n-methylacetamide;acetamide, n-methyl-;nmethylacetamide;n-methylacetamide acetamide, n-methyl- nmethylacetamide	YES (Step 1)	NO	5.3	YES	NO	1	TRUE	6	10	High		TRUE	141.3	20.65	YES	YES	TRUE	TRUE	688	353		HARMON	REPR					1	1	3	3	3	3	3	3	6	3	6	3		CC(=O)NC	C3H7NO	73.091	-1.05	4.712	-5.762	0.00704
79-39-0	2-methylprop-2-enamide;methacrylamide;2-propenamide, 2-methyl-;2-methyl-2-propenamide;methacrylamide (2-propenamide, 2-methyl-);methacryamide;2-methylprop-2-enamide methacrylamide 2-propenamide, 2-methyl- 2-methyl-2-propenamide methacrylamide (2-propenamide, 2-methyl-) methacryamide	NO (evaluated)	NO	4.5	NO	NO	1	FALSE	6	10	High		FALSE	140.5	20.25	YES	YES	TRUE	TRUE	690	355		JOINT	STOT RE					3	3	3	3	6	3	3	3	6	3	6	3		CC(=C)C(N)=O	C4H7NO	85.101	-1.11	5.313	-6.423	0.00564
79-06-1	acrylamide monomer;acrylamide;2-propenamide;acrylamide,unlessregulatedelsewhereinthisregulation;acrylamide ;prop-2-enamide;acrylamide monomer acrylamide 2-propenamide acrylamide,unlessregulatedelsewhereinthisregulation acrylamide prop-2-enamide	NO (evaluated)	NO	4.3	NO	NO	1	FALSE	6	10	High		FALSE	140.3	20.15	YES	YES	TRUE	TRUE	691	356		HARMON	CARC-MUTA-REPR-STOT RE					3	3	6	6	6	3	3	3	6	3	6	3		C=CC(N)=O	C3H5NO	71.076	-0.67	6.488	-7.158	0.00597
131-17-9	diallylphthalate;phthalic acid, diallylester;diallyl phthalate;1,2-benzenedicarboxylic acid, 1,2-di-2-propen-1-yl ester;diallyl phtalate;1,2-benzenedicarboxylic acid, di-2-propenyl ester;phthalic acid diallylester;phthalic acid, diallyl ester;diallyl phthalate (1,2-benzenedicarboxylic acid, di-2-propenyl ester);diallylphthalate phthalic acid, diallylester diallyl phthalate 1,2-benzenedicarboxylic…	NO (evaluated)	NO	3.5	NO	NO	1	FALSE	6	10	High		FALSE	139.5	19.75	YES	YES	TRUE	TRUE	692	357		JOINT	MUTA					6	6	3	3	3	3	3	3	6	3	6	3		C=CCOC(=O)c1ccccc1C(=O)OCC=C	C14H14O4	246.25	3.23	8.032	-4.802	0.0382
605-50-5	isoamyl phthalate;diisopentyl phthalate;bis(3-methylbutyl) benzene-1,2-dicarboxylate;diisopentylphthalate[4];bis(3-methylbutyl) phthalate;1,2-benzenedicarboxylic acid, bis(3-methylbutyl) ester;isoamyl phthalate diisopentyl phthalate bis(3-methylbutyl) benzene-1,2-dicarboxylate diisopentylphthalate[4] bis(3-methylbutyl) phthalate 1,2-benzenedicarboxylic acid, bis(3-methylbutyl) ester	NO (evaluated)	NO	3.5	NO	NO	1	FALSE	6	10	High		FALSE	139.5	19.75	YES	YES	TRUE	TRUE	692	357		INDIV	REPR					6	6	6	3	3	3	6	6	6	6	6	3		CC(C)CCOC(=O)c1ccccc1C(=O)OCCC(C)C	C18H26O4	306.38	5.45	9.504	-4.054	0.145
101-37-1	1,3,5-triazine, 2,4,6-tris(2-propenyloxy)-;2,4,6-triallyloxy-1,3,5-triazine;2,4,6-tris(allyloxy)-1,3,5-triazine;2,4,6-tris(prop-2-en-1-yloxy)-1,3,5-triazine;s-triazine, 2,4,6-tris(allyloxy)-;cyanuric acid, tri-2-propenyl ester;cyanuric acid triallyl ester;s-triazine, 2,4,6-tris(2-propenyloxy)-;triallyl cyanaurate;triallylcyanurat;2,4,6-tris(allyloxy)-1,3,5-triazine (1,3,5-triazine, 2,4,6-tris(2-p…	NO	NO	3.75	NO	NO	10	TRUE	10	1	High		FALSE	138.5	6.875	YES	YES	TRUE	TRUE	694	769		not classified	not applicable			x		6	6	6	6	6	6	6	6	10	6	10	6		C=CCOc1nc(OCC=C)nc(OCC=C)n1	C12H15N3O3	249.26	5.27	10.026	-4.756	1.53
1477-55-0	1,3-benzenedimethanamine;m-phenylenebis(methylamine);n,n'-dimethylbenzene-1,3-diamine;1,3-benzenedimethanamine m-phenylenebis(methylamine) n,n'-dimethylbenzene-1,3-diamine	NO	NO	3.75	NO	NO	10	TRUE	10	1	Low		FALSE	138.5	6.875	YES	YES	TRUE	TRUE	694	769		OTH-NO	CARC-STOT RE			x	x	6	6	6	6	10	6	6	6	10	6	10	6		CNc1cccc(NC)c1	C8H12N2	136.19	0.7	7.578	-6.878	0.0759
15520-11-3	peroxydicarbonic acid, bis[4-(1,1-dimethylethyl)cyclohexyl] ester;1-tert-butyl-4-{[({[(4-tert-butylcyclohexyl)oxy]carbonyl}peroxy)carbonyl]oxy}cyclohexane;peroxydicarbonic acid, bis[4-(1,1-dimethylethyl)cyclohexyl]ester;bis(4-tert-butylcyclohexyl) peroxydicarbonate;peroxydicarbonic acid, bis 4-(1,1-dimethylethyl)cyclohexyl ester;peroxydicarbonic acid, bis 4-(1,1-dimethylethyl)cyclohexyl ester;per…	NO	NO	3.75	NO	NO	10	TRUE	10	1	High		FALSE	138.5	6.875	YES	YES	TRUE	TRUE	694	769		not classified	not applicable			x	x	6	6	6	10	10	10	10	10	1	10	1	10		CC(C)(C)C1CCC(OC(=O)OOC(=O)OC2CCC(C(C)(C)C)CC2)CC1	C22H38O6	398.51	8.34	8.171	0.169	50
17796-82-6	n-cyclohexylthiophthalimide;n-(cyclohexylthio)phthalimide;1h-isoindole-1,3(2h)-dione, 2-(cyclohexylthio)-;2-(cyclohexylsulfanyl)-1h-isoindole-1,3(2h)-dione;phthalimide, n-(cyclohexylthio)-;2-cyclohexylsulfanylisoindole-1,3-dione;1h-isoindole-1,3-(2h)-dione,2-(cyclohexylthio)-;n-cyclohexylsulfenylphthalimide;n-(cyclohexylthio)phthalimide (1h-isoindole-1,3(2h)-dione, 2-(cyclohexylthio)- );n-cyclohe…	NO	NO	3.75	NO	NO	10	TRUE	10	1	High		FALSE	138.5	6.875	YES	YES	TRUE	TRUE	694	769		not classified	not applicable		x	x	x	6	10	10	10	10	10	6	6	10	10	10	10		O=C1c2ccccc2C(=O)N1SC1CCCCC1	C14H15NO2S	261.33	3.66	9.242	-5.582	3.52
25155-25-3	bis(tert-butyldioxyisopropyl)benzene;peroxide, [1,3(or 1,4)-phenylenebis(1-methylethylidene)]bis[(1,1-dimethylethyl);[1,3(or 1,4)-phenylenebis(1-methylethylidene)]bis[tert-butyl] peroxide;1,4-bis[2-(tert-butylperoxy)propan-2-yl]benzene;peroxide, [1,3(or 1,4)-phenylenebis(1-methylethylidene)]bis[(1,1-dimethylethyl)-;1,4-bis(alpha-(t-butyldioxy)isopropyl)benzene;reaction mass of 1,3-bis[2-(terbutyl…	NO	NO	3.75	NO	NO	10	TRUE	10	1	High		FALSE	138.5	6.875	YES	YES	TRUE	TRUE	694	769		not classified	not applicable		x	x	x	10	10	10	10	10	10	10	10	6	10	6	10		CC(C)(C)OOC(C)(C)c1ccc(C(C)(C)OOC(C)(C)C)cc1	C20H34O4	338.46	7.34	9.737	-2.397	55.6
37353-75-6	poly[oxy(methyl-1,2-ethanediyl)], .alpha.,.alpha.'-[(1-methylethylidene)di-4,1-phenylene]bis[.omega.-hydroxy-;phenol, 4,4'-(1-methylethylidene)bis-, polymer with methyloxirane;4,4'-isopropylidenediphenol, propoxylated;4,4'-propane-2,2-diyldiphenol, polymer with 2-methyloxirane;poly[oxy(methyl-1,2-ethanediyl)], α,α'-[(1-methylethylidene)di-4,1-phenylene]bis[ω-hydroxy-;bpa-3po;bp-3p;poly[oxy(methyl…	NO	NO	3.75	NO	NO	10	TRUE	10	1	High		FALSE	138.5	6.875	YES	YES	TRUE	TRUE	694	769		not classified	not applicable		x	x	x	10	10	10	10	10	10	10	10	10	10	10	10		CC(CO)OC(C)COCC(C)OC(C)COc1ccc(C(C)(C)c2ccc(OC(C)COCC(C)OC(C)COCC(C)O)cc2)cc1	C39H64O10	692.89	4.92	12	-7.08	0.958
6731-36-8	1,1-bis(tert-butyldioxy)-3,3,5-trimethyl cycloh;peroxide, 1,1'-(3,3,5-trimethylcyclohexylidene)bis[2-(1,1-dimethylethyl);1,1-bis(tert-butylperoxy)-3,3,5-trimethylcyclohexane;peroxide, (3,3,5-trimethylcyclohexylidene)bis[(1,1-dimethylethyl);di-tert-butylperoxy-3,3,5-trimethylcyclohexane p;1,1-bis(tert-butyldioxy)-3,3,5-trimethylcyclohexane;di-tert-butyl 3,3,5-trimethylcyclohexylidene diperoxide;pe…	NO	NO	3.75	NO	NO	10	TRUE	10	1	High		FALSE	138.5	6.875	YES	YES	TRUE	TRUE	694	769		not classified	not applicable				x	6	6	6	10	6	10	6	6	3	6	3	6		CC1CC(C)(C)CC(OOC(C)(C)C)(OOC(C)(C)C)C1	C17H34O4	302.43	6.53	7.739	-1.209	10.2
78-63-7	2,5-bis(tert-butylperoxy)-2,5-dimethylhexane;2,5-dimethyl-2,5-bis(tert-butylperoxy)hexane;varox;peroxide, (1,1,4,4-tetramethyl-1,4-butanediyl)bis[(1,1-dimethylethyl);di-tert-butyl 1,1,4,4-tetramethyltetramethylene diperoxide;peroxide, (1,1,4,4-tetramethyl-1,4-butanediyl)bis (1,1-dimethylethyl);peroxide, (1,1,4,4-tetramethyltetramethylene)bis(tert-butyl;peroxide, (1,1,4,4-tetramethyl-1,4-butanediy…	NO	NO	3.75	NO	NO	10	TRUE	10	1	High		FALSE	138.5	6.875	YES	YES	TRUE	TRUE	694	769		not classified	not applicable				x	6	6	6	10	6	10	6	6	3	6	3	6		CC(C)(C)OOC(C)(C)CCC(C)(C)OOC(C)(C)C	C16H34O4	290.42	6.55	7.529	-0.979	10.9
98-29-3	p-tert-butylcatechol;4-tert-butyl catechol;1,2-benzenediol, 4-(1,1-dimethylethyl)-;4-tert-butylpyrocatechol;4-tert-butylbenzene-1,2-diol;4tertbutylpyrocatechol;pyrocatechol, 4-tert-butyl-;p-tert-butyl catechol;tbupyroc4;p-tert-butylcatechol 4-tert-butyl catechol 1,2-benzenediol, 4-(1,1-dimethylethyl)- 4-tert-butylpyrocatechol 4-tert-butylbenzene-1,2-diol 4tertbutylpyrocatechol pyrocatechol, 4-ter…	NO	NO	3.75	NO	NO	10	TRUE	10	1	Low		FALSE	138.5	6.875	YES	YES	TRUE	TRUE	694	769		OTH-NO	CARC-REPR		x	x	x	10	10	10	10	10	10	10	10	10	10	10	10		CC(C)(C)c1ccc(O)c(O)c1	C10H14O2	166.21	2.94	11.149	-8.209	0.0636
105-76-0	dibutyl maleate;dibutylmaleate;2-butenedioic acid (2e)-, dibutyl ester;maleic acid, dibutylester;2-butenedioic acid (z)-, dibutyl ester;2-butenedioic acid (2z)-, dibutyl ester;dibutyl (2z)-but-2-enedioate;2-butenedioic acid, (z)-, dibutyl ester;maleic acid, dibutyl ester;dibutyl but-2-enedioate;dibutyl maleate dibutylmaleate 2-butenedioic acid (2e)-, dibutyl ester maleic acid, dibutylester 2-bute…	NO (evaluated)	NO	2.3	NO	NO	1	FALSE	6	10	High		FALSE	138.3	19.15	YES	YES	TRUE	TRUE	703	359		JOINT	STOT RE					6	6	3	3	3	3	3	3	6	3	6	3		CCCCOC(=O)C=CC(=O)OCCCC	C12H20O4	228.27	4.16	8.976	-4.816	0.0344
62-56-6	thiourea;urea, thio-;pseudourea, 2-thio-;urea, thio- (8ci);thiourea urea, thio- pseudourea, 2-thio- urea, thio- (8ci)	NO (evaluated)	NO	1.3	NO	NO	1	FALSE	6	10	High		FALSE	137.3	18.65	YES	YES	TRUE	TRUE	704	360		HARMON	CARC-REPR					3	3	3	3	6	3	3	3	6	3	6	3		NC(N)=S	CH4N2S	76.12	-1.08	6.012	-7.092	0.00219
79-07-2	2-chloroacetamide;chloroacetamide;acetamide, 2-chloro-;2-chloroacetamide chloroacetamide acetamide, 2-chloro-	NO (evaluated)	NO	1.3	NO	NO	1	FALSE	6	10	High		FALSE	137.3	18.65	YES	YES	TRUE	TRUE	704	360		HARMON	REPR					3	3	6	6	6	3	3	3	6	3	6	3		NC(=O)CCl	C2H4ClNO	93.511	-0.53	6.263	-6.793	0.00708
556-52-5	glycidol;2-oxiranemethanol;oxiranemethanol;2,3-epoxypropan-1-ol;oxiran-2-ylmethanol;2,3epoxypropan1ol(glycidol);1-propanol, 2,3-epoxy-;glycidol 2-oxiranemethanol oxiranemethanol 2,3-epoxypropan-1-ol oxiran-2-ylmethanol 2,3epoxypropan1ol(glycidol) 1-propanol, 2,3-epoxy-	NO (evaluated)	NO	1.25	NO	NO	1	FALSE	6	10	High		FALSE	137.25	18.625	YES	YES	TRUE	TRUE	706	362		HARMON	CARC-MUTA-REPR					3	3	6	3	6	3	3	3	6	3	6	3		OCC1CO1	C3H6O2	74.075	-0.95	5.672	-6.622	0.0107
60-35-5	acetamide;carbamoylmethane;acetamide carbamoylmethane	NO (evaluated)	NO	1.25	NO	NO	1	FALSE	6	10	High		FALSE	137.25	18.625	YES	YES	TRUE	TRUE	706	362		HARMON	CARC					1	1	3	3	3	3	3	3	6	3	6	3		CC(N)=O	C2H5NO	59.066	-1.26	5.079	-6.339	0.00375
82428-30-6	7-oxabicyclo[4.1.0]hept-3-ylmethyl 2-methylprop-2-enoate	NO (evaluated)	NO	1.125	NO	NO	1	FALSE	6	10	High		FALSE	137.125	18.5625	YES	YES	TRUE	TRUE	708	364		INDIV	MUTA					6	6	6	6	6	6	3	3	6	6	6	6		CC(=C)C(=O)OCC1CCC2C(C1)O2	C11H16O3	196.23	2.52	7.275	-4.755	0.246
139504-68-0	2-butanol, 1-[[2-(1,1-dimethylethyl)cyclohexyl]oxy];2-butanol, 1-[[2-(1,1-dimethylethyl)cyclohexyl]oxy]-;2-butanol, 1-[[2-(1,1-dimethylethyl)cyclohexyl]oxy] 2-butanol, 1-[[2-(1,1-dimethylethyl)cyclohexyl]oxy]-	NO	NO	10	YES	NO	10	TRUE	6	1	High		FALSE	137	6.8	YES	YES	TRUE	TRUE	709	778		not classified	not applicable					6	6	6	6	6	6	6	6	6	6	6	6		CCC(O)COC1CCCCC1C(C)(C)C	C14H28O2	228.36	4.05	8.819	-4.769	0.971
6297-03-6	dioctadecyl ether;1,1'-oxydioctadecane;dioctadecyl ether 1,1'-oxydioctadecane	NO	NO	6	NO	NO	6	TRUE	10	1	High		FALSE	137	6.8	YES	YES	TRUE	TRUE	709	778		not classified	not applicable		x	x		10	10	6	6	6	6	10	10	3	10	3	10		CCCCCCCCCCCCCCCCCCOCCCCCCCCCCCCCCCCCC	C36H74O	522.94	12	12	0	4280
10094-45-8	stearyl erucamide;13-docosenamide, n-octadecyl-, (z)-;(z)-n-octadecyldocos-13-enamide;(13z)-n-octadecyldocos-13-enamide;13-docosenamide, n-octadecyl-, (13z)-;n-octadecyldocos-13-enamide;stearyl erucamide 13-docosenamide, n-octadecyl-, (z)- (z)-n-octadecyldocos-13-enamide (13z)-n-octadecyldocos-13-enamide 13-docosenamide, n-octadecyl-, (13z)- n-octadecyldocos-13-enamide	NO	NO	6	NO	NO	6	TRUE	10	1	High		FALSE	137	6.8	YES	YES	TRUE	TRUE	709	778		not classified	not applicable		x	x		10	10	6	6	6	6	10	10	3	10	3	10		CCCCCCCCCCCCCCCCCCNC(=O)CCCCCCCCCCCC=CCCCCCCCC	C40H79NO	590.03	12	12	0	1830
105-62-4	9-octadecenoic acid (z)-, 1-methyl-1,2-ethanediyl ester;1-methyl-1,2-ethanediyl dioleate;9-octadecenoic acid (9z)-, 1-methyl-1,2-ethanediyl ester;propane-1,2-diyl (9z,9'z)bis-octadec-9-enoate;9-octadecenoic acid, 1-methyl-1,2-ethanediyl ester, (z)-;oleic acid, propylene ester;1-methyl-1,2-ethanediyl 9-octadecenoate;9-octadecenoic acid (z)-, 1-methyl-1,2-ethanediyl ester 1-methyl-1,2-ethanediyl di…	NO	NO	6	NO	NO	6	TRUE	10	1	High		FALSE	137	6.8	YES	YES	TRUE	TRUE	709	778		not classified	not applicable			x		6	6	6	6	6	6	10	10	3	10	3	10		CCCCCCCCC=CCCCCCCCC(=O)OCC(C)OC(=O)CCCCCCCC=CCCCCCCCC	C39H72O4	604.95	12	12	0	112
107-75-5	3,7-dimethyl-7-hydroxy-octanal;hydroxycitronellal;octanal, 7-hydroxy-3,7-dimethyl-;7-hydroxycitronellal;7-hydroxy-3,7-dimethyloctanal;3,7-dimethyl-7-hydroxy-octanal hydroxycitronellal octanal, 7-hydroxy-3,7-dimethyl- 7-hydroxycitronellal 7-hydroxy-3,7-dimethyloctanal	NO	NO	6	NO	NO	6	TRUE	10	1	High		FALSE	137	6.8	YES	YES	TRUE	TRUE	709	778		not classified	not applicable			x		6	6	6	6	6	6	6	6	10	6	10	6		CC(CCCC(C)(C)O)CC=O	C10H20O2	172.26	2.11	8.12	-6.01	0.182
110-30-5	1,2-bis(stearoylamino)ethane;octadecanamide, n,n'-1,2-ethanediylbis-;ethylenebisoctadecanamide;n-(2-octadecanoylaminoethyl)octadecanamide;octadecanamide, n,n’-1,2-ethanediylbis-;n,n'-ethylenedi(stearamide);n,n'-ethane-1,2-diyldioctadecanamide;octadecanamide, n,n'-ethylenebis-;n,n'-1,2-ethanediylbis-octadecanamide;1,2-bis(stearoylamino)ethane octadecanamide, n,n'-1,2-ethanediylbis- ethylenebisocta…	NO	NO	6	NO	NO	6	TRUE	10	1	High		FALSE	137	6.8	YES	YES	TRUE	TRUE	709	778		not classified	not applicable			x		6	6	3	6	6	6	10	10	3	10	3	10		CCCCCCCCCCCCCCCCCC(=O)NCCNC(=O)CCCCCCCCCCCCCCCCC	C38H76N2O2	592.99	12	12	0	26.9
110-31-6	9-octadecenamide, n,n’-1,2-ethanediylbis-, (z,z)-;n,n'-ethane-1,2-diylbisoleamide;(9z,9'z)-n,n'-ethane-1,2-diylbisoctadec-9-enamide;9-octadecenamide, n,n'-1,2-ethanediylbis-, (z,z)-;9-octadecenamide, n,n'-1,2-ethanediylbis-, (9z,9'z)-;oleamide, n,n'-ethylenebis-;n,n'-ethane-1,2-diylbisoctadec-9-enamide;amides, c16-c18 (even numbered, c18 unsaturated) n,n'-ethylenebis;amides, c16-c20 (even numbere…	NO	NO	6	NO	NO	6	TRUE	10	1	High		FALSE	137	6.8	YES	YES	TRUE	TRUE	709	778		not classified	not applicable			x		6	6	3	6	6	6	10	10	3	10	3	10		CCCCCCCCC=CCCCCCCCC(=O)NCCNC(=O)CCCCCCCC=CCCCCCCCC	C38H72N2O2	588.96	12	12	0	40.4
122-32-7	9-octadecenoic acid (z)-, 1,2,3-propanetriyl est;9-octadecenoic acid (z)-, 1,2,3-propanetriyl ester;1,2,3-propanetriyl trioleate;triolein c18:1;propane-1,2,3-triyl (9z,9'z,9''z)tris-octadec-9-enoate;9-octadecenoic acid, 1,2,3-propanetriyl ester, (z)-;9-octadecenoic acid (9z)-, 1,2,3-propanetriyl ester;olein, tri-;glyceryl trioleate;propane-1,2,3-triyl trisoctadec-9-enoate;9-octadecenoic acid (z)-…	NO	NO	6	NO	NO	6	TRUE	10	1	High		FALSE	137	6.8	YES	YES	TRUE	TRUE	709	778		not classified	not applicable		x	x		10	10	6	6	6	6	10	10	3	10	3	10		CCCCCCCCC=CCCCCCCCC(=O)OCC(COC(=O)CCCCCCCC=CCCCCCCCC)OC(=O)CCCCCCCC=CCCCCCCCC	C57H104O6	885.39	12	12	0	2360
123-26-2	octadecanamide, n,n’-1,2-ethanediylbis[12-hydroxy-;n,n'-ethane-1,2-diylbis(12-hydroxyoctadecanamide);octadecanamide, n,n'-1,2-ethanediylbis[12-hydroxy-;n,n'-ethane-1,2-diylbis(12-hydroxyoctadecan-1-amide);octadecanamide, n,n'-1,2-ethanediylbis 12-hydroxy-;octadecanamide, n,n'-ethylenebisХ12-hydroxy-;octadecanamide, n,n'-1,2-ethanediylbisХ12-hydroxy-;1,2-ethylene bis(12-hydroxystearamide);bisamide…	NO	NO	6	NO	NO	6	TRUE	10	1	High		FALSE	137	6.8	YES	YES	TRUE	TRUE	709	778		not classified	not applicable			x		6	6	3	3	3	3	6	6	1	10	3	6		CCCCCCC(O)CCCCCCCCCCC(=O)NCCNC(=O)CCCCCCCCCCC(O)CCCCCC	C38H76N2O4	624.99	11.31	12	-0.69	0.94
13276-08-9	octadecanamide, n-octadecyl-;n-octadecylstearamide;n-octadecyloctadecanamide;octadecanamide, n-octadecyl- n-octadecylstearamide n-octadecyloctadecanamide	NO	NO	6	NO	NO	6	TRUE	10	1	High		FALSE	137	6.8	YES	YES	TRUE	TRUE	709	778		not classified	not applicable		x	x		10	6	6	6	6	6	10	10	3	10	3	10		CCCCCCCCCCCCCCCCCCNC(=O)CCCCCCCCCCCCCCCCC	C36H73NO	535.94	12	12	0	414
16260-09-6	hexadecanamide, n-9-octadecenyl-, (z)-;n-[(9e)-octadec-9-en-1-yl]hexadecanamide;hexadecanamide, n-(9z)-9-octadecenyl-;(z)-n-octadec-9-enylhexadecan-1-amide;n-octadec-9-en-1-ylhexadecanamide;hexadecanamide, n-9-octadecenyl-, (z)- n-[(9e)-octadec-9-en-1-yl]hexadecanamide hexadecanamide, n-(9z)-9-octadecenyl- (z)-n-octadec-9-enylhexadecan-1-amide n-octadec-9-en-1-ylhexadecanamide	NO	NO	6	NO	NO	6	TRUE	10	1	High		FALSE	137	6.8	YES	YES	TRUE	TRUE	709	778		not classified	not applicable		x	x		10	6	3	6	6	6	10	10	3	10	3	10		CCCCCCCCCCCCCCCC(=O)NCCCCCCCCC=CCCCCCCCC	C34H67NO	505.88	12	12	0	267
16613-04-0	2-(4-benzoyl-3-hydroxyphenoxy)ethyl (2-methyl)-2-propenoat;uls-611;2-(4-benzoyl-3-hydroxyphenoxy)ethyl (2-methyl)-2-propenoat uls-611	NO	NO	6	NO	YES	6	TRUE	10	1	High		FALSE	137	6.8	YES	YES	TRUE	TRUE	709	778		not classified	not applicable		x	x	x	10	10	10	10	10	10	10	10	10	6	10	6		CC(=C)C(=O)OCCOc1ccc(C(=O)c2ccccc2)c(O)c1	C19H18O5	326.33	4.46	12	-7.54	0.0476
17671-27-1	docosanoic acid, docosyl ester;docosyl docosanoate;fatty acids c-20-22 (even numbered), c18-22 (even numbered)-alkyl esters;docosanoic acid, docosyl ester docosyl docosanoate fatty acids c-20-22 (even numbered), c18-22 (even numbered)-alkyl esters	NO	NO	6	NO	NO	6	TRUE	10	1	High		FALSE	137	6.8	YES	YES	TRUE	TRUE	709	778		not classified	not applicable		x	x		10	10	6	6	6	6	10	10	3	10	3	10		CCCCCCCCCCCCCCCCCCCCCCOC(=O)CCCCCCCCCCCCCCCCCCCCC	C44H88O2	649.13	12	12	0	7780
17673-56-2	13-docosenoic acid, (9z)-9-octadecenyl ester, (13z)-;(z)-octadec-9-enyl (z)-docos-13-enoate;(9z)-octadec-9-en-1-yl (13z)-docos-13-enoate;13-docosenoic acid, 9-octadecenyl ester, (z,z)-;octadec-9-en-1-yl docos-13-enoate;oleyl erucate;13-docosenoic acid, (9z)-9-octadecenyl ester, (13z)- (z)-octadec-9-enyl (z)-docos-13-enoate (9z)-octadec-9-en-1-yl (13z)-docos-13-enoate 13-docosenoic acid, 9-octadec…	NO	NO	6	NO	NO	6	TRUE	10	1	High		FALSE	137	6.8	YES	YES	TRUE	TRUE	709	778		not classified	not applicable		x	x		10	10	6	6	6	6	10	10	3	10	3	10		CCCCCCCCC=CCCCCCCCCCCCC(=O)OCCCCCCCCC=CCCCCCCCC	C40H76O2	589	12	12	0	3240
18835-33-1	1-hexacosene;hexacos-1-ene;1-hexacosene hexacos-1-ene	NO	NO	6	NO	NO	6	TRUE	10	1	High		FALSE	137	6.8	YES	YES	TRUE	TRUE	709	778		not classified	not applicable			x		6	3	6	6	6	6	10	10	1	10	1	10		CCCCCCCCCCCCCCCCCCCCCCCCC=C	C26H52	364.67	12	9.341	2.659	444
18835-34-2	octacos-1-ene;1-octacosene;octacos-1-ene 1-octacosene	NO	NO	6	NO	NO	6	TRUE	10	1	High		FALSE	137	6.8	YES	YES	TRUE	TRUE	709	778		not classified	not applicable			x		6	6	3	6	6	6	10	10	1	10	1	10		CCCCCCCCCCCCCCCCCCCCCCCCCCC=C	C28H56	392.72	12	10.086	1.914	842
25151-96-6	9-octadecenoic acid (z)-, 2,2-bis(hydroxymethyl)-1,3-propanediyl ester;2,2-bis(hydroxymethyl)-1,3-propanediyl dioleate;2,2-bis(hydroxymethyl)propane-1,3-diyl (9z,9'z)bis-octadec-9-enoate;9-octadecenoic acid, 2,2-bis(hydroxymethyl)-1,3-propanediylester, (z)-;9-octadecenoic acid (9z)-, 2,2-bis(hydroxymethyl)-1,3-propanediyl ester;fatty acid c18 unsat ester with pentaerytritol;9-octadecenoic acid (z…	NO	NO	6	NO	NO	6	TRUE	10	1	High		FALSE	137	6.8	YES	YES	TRUE	TRUE	709	778		not classified	not applicable			x		6	6	3	3	3	3	10	10	1	10	3	10		CCCCCCCCC=CCCCCCCCC(=O)OCC(CO)(CO)COC(=O)CCCCCCCC=CCCCCCCCC	C41H76O6	665	12	12	0	10.2
28473-19-0	bis(8-methylnonyl) decanedioate;diisodecyl sebacate;decanedioic acid, diisodecyl ester;bis(8-methylnonyl) sebacate;bis(8-methylnonyl) decanedioate diisodecyl sebacate decanedioic acid, diisodecyl ester bis(8-methylnonyl) sebacate	NO	NO	6	NO	NO	6	TRUE	10	1	High		FALSE	137	6.8	YES	YES	TRUE	TRUE	709	778		not classified	not applicable			x		6	6	3	3	3	3	6	6	1	10	1	10		CC(C)CCCCCCCOC(=O)CCCCCCCCC(=O)OCCCCCCCC(C)C	C30H58O4	482.75	12	12	0	3.43
3061-75-4	docosanamide;behenamide;docosanamide behenamide	NO	NO	6	NO	NO	6	TRUE	10	1	High		FALSE	137	6.8	YES	YES	TRUE	TRUE	709	778		not classified	not applicable		x	x	x	10	10	10	10	6	10	6	6	6	10	6	10		CCCCCCCCCCCCCCCCCCCCCC(N)=O	C22H45NO	339.58	8.66	12	-3.34	2.64
42222-50-4	9-octadecenoic acid (z)-, 2,2-dimethyl-1,3-propanediyl ester;2,2-dimethyl-1,3-propanediyl dioleate;9-octadecenoic acid (9z)-, 2,2-dimethyl-1,3-propanediyl ester;2,2-dimethylpropane-1,3-diyl (9z,9'z)bis-octadec-9-enoate;9-octadecenoic acid (z)-, 2,2-dimethyl-1,3-propanediyl ester 2,2-dimethyl-1,3-propanediyl dioleate 9-octadecenoic acid (9z)-, 2,2-dimethyl-1,3-propanediyl ester 2,2-dimethylpropane…	NO	NO	6	NO	NO	6	TRUE	10	1	High		FALSE	137	6.8	YES	YES	TRUE	TRUE	709	778		not classified	not applicable		x	x		10	6	6	6	6	6	10	10	3	10	3	10		CCCCCCCCC=CCCCCCCCC(=O)OCC(C)(C)COC(=O)CCCCCCCC=CCCCCCCCC	C41H76O4	633.01	12	12	0	270
555-43-1	tristearin;octadecanoic acid, 1,2,3-propanetriyl ester;glycerol tristearate;propane-1,2,3-triyl trioctadecanoate;tristearin octadecanoic acid, 1,2,3-propanetriyl ester glycerol tristearate propane-1,2,3-triyl trioctadecanoate	NO	NO	6	NO	NO	6	TRUE	10	1	High		FALSE	137	6.8	YES	YES	TRUE	TRUE	709	778		not classified	not applicable		x	x		10	10	6	6	6	6	10	10	3	10	3	10		CCCCCCCCCCCCCCCCCC(=O)OCC(COC(=O)CCCCCCCCCCCCCCCCC)OC(=O)CCCCCCCCCCCCCCCCC	C57H110O6	891.43	12	12	0	1280
58958-60-4	isostearyl neopentanoate;propanoic acid, 2,2-dimethyl-, isooctadecyl ester;16-methylheptadecyl 2,2-dimethylpropanoate;isooctadecyl pivalate	NO	NO	6	NO	NO	6	TRUE	10	1	High		FALSE	137	6.8	YES	YES	TRUE	TRUE	709	778		not classified	not applicable			x		6	6	6	6	3	6	10	10	1	10	1	6		CC(C)CCCCCCCCCCCCCCCOC(=O)C(C)(C)C	C23H46O2	354.59	10.01	9.693	0.317	9.3
59231-34-4	8-methylnonyl (9e)-octadec-9-enoate;9-octadecenoic acid, isodecyl ester, (z)-;9-octadecenoic acid (9z)-, isodecyl ester;isodecyl oleate;8-methylnonyl (9e)-octadec-9-enoate 9-octadecenoic acid, isodecyl ester, (z)- 9-octadecenoic acid (9z)-, isodecyl ester isodecyl oleate	NO	NO	6	NO	NO	6	TRUE	10	1	High		FALSE	137	6.8	YES	YES	TRUE	TRUE	709	778		not classified	not applicable			x		6	6	3	6	3	6	10	10	1	10	1	10		CCCCCCCCC=CCCCCCCCC(=O)OCCCCCCCC(C)C	C28H54O2	422.7	12	11.484	0.516	50.3
61791-12-6	castor oil, ethoxylated;ethoxylated caster oil;castor oil, ethoxylated ethoxylated caster oil	NO	NO	6	NO	NO	6	TRUE	10	1	High		FALSE	137	6.8	YES	YES	TRUE	TRUE	709	778		not classified	not applicable			x		6	6	3	3	3	3	6	6	1	10	1	10		CCCCCCC(CC=CCCCCCCCC(=O)OCC(C(=O)OCCCCCCCC=CCC(O)CCCCCC)OC(=O)CCCCCCC=CCC(O)CCCCCC)OCCOCCOCCOCCOCCO	C65H120O14	1125.6	12	12	0	1.14
64147-40-6	castor oil, dehydrated	NO	NO	6	NO	NO	6	TRUE	10	1	High		FALSE	137	6.8	YES	YES	TRUE	TRUE	709	778		not classified	not applicable		x	x		10	10	6	6	6	6	10	10	3	10	3	10		CCCCCC=CCC=CCCCCCCCC(=O)OCC(COC(=O)CCCCCCCC=CCC=CCCCCC)OC(=O)CCCCCCCC=CCC=CCCCCC	C57H98O6	879.34	12	12	0	4340
66455-14-9	alcohols, c12-13, ethoxylated;c12-13 alcohols, ethoxylated;alcohols, c12-13, ethoxylates, 1-2.5 eo;alcohols, c12-13, ethoxylated c12-13 alcohols, ethoxylated alcohols, c12-13, ethoxylates, 1-2.5 eo	NO	NO	6	NO	NO	6	TRUE	10	1	High		FALSE	137	6.8	YES	YES	TRUE	TRUE	709	778		not classified	not applicable		x	x	x	10	10	10	10	10	10	10	10	10	10	10	10		CCCCCCCCCCCCOCCOCCOCCOCCOCCO	C22H46O6	406.58	3.4	12	-8.6	0.139
67762-55-4	alkenes, c15-18 ?-, sulfurized;alkenes, c15-18 .alpha.-, sulfurized;alkenes, c15-18 alpha-, sulfurized;alkenes, c15-18 α-, sulfurized;alkenes, c15-18 ?-, sulfurized alkenes, c15-18 .alpha.-, sulfurized alkenes, c15-18 alpha-, sulfurized alkenes, c15-18 α-, sulfurized	NO	NO	6	NO	NO	6	TRUE	10	1	High		FALSE	137	6.8	YES	YES	TRUE	TRUE	709	778		not classified	not applicable		x	x		10	10	3	6	6	6	10	10	3	10	3	10		CCCCCCCCCCCCCCCSSCCCCCCCCCCCCCCC	C30H62S2	486.92	12	12	0	1790
68213-23-0	alcohols, c12-18, ethoxylated;alcohols, c12-18(even numbered), ethoxylated;alcohols, c12-18, ethoxylated alcohols, c12-18(even numbered), ethoxylated	NO	NO	6	NO	NO	6	TRUE	10	1	High		FALSE	137	6.8	YES	YES	TRUE	TRUE	709	778		not classified	not applicable		x	x	x	10	10	10	10	10	10	10	10	10	10	10	10		CCCCCCCCCCCCCCOCCOCCOCCOCCOCCO	C24H50O6	434.63	4.38	12	-7.62	0.264
68258-72-0	2,2-bis(hydroxymethyl)propane-1,3-diyl didocosanoate;docosanoic acid, 2,2-bis(hydroxymethyl)-1,3-propanediyl ester	NO	NO	6	NO	NO	6	TRUE	10	1	High		FALSE	137	6.8	YES	YES	TRUE	TRUE	709	778		not classified	not applicable			x		6	6	6	6	6	6	10	10	3	10	3	10		CCCCCCCCCCCCCCCCCCCCCC(=O)OCC(CO)(CO)COC(=O)CCCCCCCCCCCCCCCCCCCCC	C49H96O6	781.24	12	12	0	88
68915-97-9	gas oils (petroleum), straight-run, high-boiling;gas oils, petroleum, straight-run, high-boiling;gas oils, petroleum, straight run, high boiling;gas oils (petroleum), straight-run, high-boiling gas oils, petroleum, straight-run, high-boiling gas oils, petroleum, straight run, high boiling	NO	NO	6	NO	NO	6	TRUE	10	1	High		FALSE	137	6.8	YES	YES	TRUE	TRUE	709	778		not classified	not applicable		x	x		10	10	6	6	6	6	10	10	3	10	3	10		CCCCCCCCCCCCCCCCCCCCCCCCCCCCCCCCCCCC	C36H74	506.94	12	12	0	12100
72684-95-8	benzonitrile, 4-hydroxy-3,5-dimethoxy-;4-hydroxy-3,5-dimethoxybenzonitrile;syringonitrile;benzonitrile, 4-hydroxy-3,5-dimethoxy- 4-hydroxy-3,5-dimethoxybenzonitrile syringonitrile	NO	NO	6	NO	YES	6	TRUE	10	1	High		FALSE	137	6.8	YES	YES	TRUE	TRUE	709	778		not classified	not applicable		x	x	x	10	10	10	10	10	10	10	10	10	10	10	10		COc1cc(C#N)cc(OC)c1O	C9H9NO3	179.17	1.26	10.37	-9.11	0.0338
922165-31-9	1,4-cyclohexanedicarboxylic acid, 1,4-bis[2-(2-ethoxyethoxy)ethyl] ester;bis[2-(2-ethoxyethoxy)ethyl] cyclohexane-1,4-dicarboxylate;bis-ethoxydiglycol cyclohexane 1,4-dicarboxylate;1,4-cyclohexanedicarboxylic acid, 1,4-bis[2-(2-ethoxyethoxy)ethyl] ester bis[2-(2-ethoxyethoxy)ethyl] cyclohexane-1,4-dicarboxylate bis-ethoxydiglycol cyclohexane 1,4-dicarboxylate	NO	NO	6	NO	YES	6	TRUE	10	1	High		FALSE	137	6.8	YES	YES	TRUE	TRUE	709	778		not classified	not applicable		x	x	x	10	10	10	10	10	10	10	10	10	10	10	10		CCOCCOCCOC(=O)C1CCC(C(=O)OCCOCCOCC)CC1	C20H36O8	404.48	1.99	12	-10.01	0.00411
93803-87-3	2-octyldodecyl 16-methylheptadecanoate;isooctadecanoic acid, 2-octyldodecyl ester;2-octyldodecyl isooctadecanoate;2-octyldodecyl 16-methylheptadecanoate isooctadecanoic acid, 2-octyldodecyl ester 2-octyldodecyl isooctadecanoate	NO	NO	6	NO	NO	6	TRUE	10	1	High		FALSE	137	6.8	YES	YES	TRUE	TRUE	709	778		not classified	not applicable		x	x		10	6	6	6	6	6	10	10	3	10	3	10		CCCCCCCCCCC(CCCCCCCC)COC(=O)CCCCCCCCCCCCCCC(C)C	C38H76O2	564.98	12	12	0	1050
93924-11-9	alkenes, c24-28 ±-;alkenes, c24-28 .alpha.-;alkenes, c24-28 ?-;alkenes, c24-28 α-;alkenes, c24-28 ±- alkenes, c24-28 .alpha.- alkenes, c24-28 ?- alkenes, c24-28 α-	NO	NO	6	NO	NO	6	TRUE	10	1	High		FALSE	137	6.8	YES	YES	TRUE	TRUE	709	778		not classified	not applicable			x		6	3	6	6	6	6	10	10	1	10	1	10		CCCCCCCCCCCCCCCCCCCCCCCCC=C	C26H52	364.67	12	9.341	2.659	444
10508-09-5	di-tert-pentyl peroxide;2,2'-dioxybis(2-methylbutane);peroxide, bis(1,1-dimethylpropyl);tert-pentyl peroxide;di-tert-amyl peroxide;di-tert-pentyl peroxide 2,2'-dioxybis(2-methylbutane) peroxide, bis(1,1-dimethylpropyl) tert-pentyl peroxide di-tert-amyl peroxide	NO	NO	2.75	NO	NO	10	TRUE	3	10	High		FALSE	136.5	18.25	YES	YES	TRUE	TRUE	743	365		JOINT	MUTA					1	1	3	3	3	3	3	3	1	1	1	1		CCC(C)(C)OOC(C)(C)CC	C10H22O2	174.27	4.43	4.494	-0.064	1.99
26762-92-5	cyclohexane, 1-methyl-4-(1-methylethyl)-, monohydroperoxy deriv.;menthane, monohydroperoxy derivative;1-methyl-4-(propan-2-yl)cyclohexyl hydroperoxide;cyclohexane, 1-methyl-4-(1-methylethyl)-, monohydroperoxy derivative;cyclohexane, 1-methyl-4-(1-methylethyl)-, monohydroperoxy deriv. menthane, monohydroperoxy derivative 1-methyl-4-(propan-2-yl)cyclohexyl hydroperoxide cyclohexane, 1-methyl-4-(1-m…	NO	NO	2.75	NO	NO	10	TRUE	3	10	High		FALSE	136.5	18.25	YES	YES	TRUE	TRUE	743	365		JOINT	STOT RE					3	3	3	3	3	3	3	3	3	3	3	3		CC(C)C1CCC(C)(OO)CC1	C10H20O2	172.26	3.63	6.433	-2.803	0.601
[truncated: 1,591 more rows]
[truncated: 8 more columns]

## Sheet: 212_substances
CAS No.	Name	Final priority substance	Listed in	Score A	Default Tonnage Score	Default ERC Score	Score B	Score A > 5 OR Score B > 5	Score C	Final Tox Score	Reliability of Tox Score	Total Score and Ranking ->	Pivot Table selection	Total Score (WS1)	Total Score (WS2)	Priority WS1	Priority WS2	Priority WS1 AND WS2	Priority WS1 OR WS2	Ranking WS 1	Ranking WS 2	Toxicity classification ->	Basis	Endpoint for basis of scoring (including OTH-NO)	Scores in food/ feed items (block C) ->	Score C 10 in FISH	Score C 10 in F&V	Score C 10 in M&M	Fish 1	Fish 2	Beef Cattle	Dairy cattle	Milk	Dairy Products	Apple	Grain	Potato	Lettuce	Carrot	Grass	Physico-chemical properties ->	SMILES	Molecular formula	MW	log Kow	log Koa	log Kaw	Biotransformation half-life [d]	Additional use information ->
[truncated: 212 more rows]
[truncated: 9 more columns]

[truncated: 2 more sheets: 517_substances, 74_substances]
